# Supplementary material for: The Lon protease temporally restricts polar cell differentiation events during the Caulobacter cell cycle
Source: eLife. 2021 Oct 25;10:e73875. doi: 10.7554/eLife.73875 (PMC8545394; doi:10.7554/eLife.73875)
Supplement: Figure 1—source data 1. [file elife-73875-fig1-data1.xlsx]

## Sheet: Replicate 1
Replicate 1			WT 0 min	WT 15 min	WT 30 min	Dlon 0 min	Dlon 15 min	Dlon 30 min	gluc	xyl 1h lon overexpression	Lon depletion (no van)	lon expression (+ van)	Dlon 0/WT 0	Lon depletion (no van)/lon expression (+ van)	gluc/+ xyl 1h lon overexpression	WT 0/WT 30	Dlon 0/Dlon 30	(WT 0/WT 30)/(Dlon 0/Dlon 30)
Accession	Description	Gene	126/(126+127_N+127_C+128_N+128_C+129_N+129_C+130_N+130_C+131)	127_N/(126+127_N+127_C+128_N+128_C+129_N+129_C+130_N+130_C+131)	127_C/(126+127_N+127_C+128_N+128_C+129_N+129_C+130_N+130_C+131)	128_N/(126+127_N+127_C+128_N+128_C+129_N+129_C+130_N+130_C+131)	128_C/(126+127_N+127_C+128_N+128_C+129_N+129_C+130_N+130_C+131)	129_N/(126+127_N+127_C+128_N+128_C+129_N+129_C+130_N+130_C+131)	129_C/(126+127_N+127_C+128_N+128_C+129_N+129_C+130_N+130_C+131)	130_N/(126+127_N+127_C+128_N+128_C+129_N+129_C+130_N+130_C+131)	130_C/(126+127_N+127_C+128_N+128_C+129_N+129_C+130_N+130_C+131)	131/(126+127_N+127_C+128_N+128_C+129_N+129_C+130_N+130_C+131)
A0A0H3C2I0	Dephospho-CoA kinase OS=Caulobacter crescentus (strain NA1000 / CB15N) GN=coaE PE=3 SV=1 - [A0A0H3C2I0_CAUCN]	coaE	1.0553	1.06105	1.07086	0.840626	0.907769	0.832538	0.96903	0.984137	1.14197	1.1046	0.796578	1.03382	0.98465	0.985462	1.00971	0.975981
A0A0H3C2I6	DNA mismatch repair protein MutS OS=Caulobacter crescentus (strain NA1000 / CB15N) GN=mutS PE=3 SV=1 - [A0A0H3C2I6_CAUCN]	mutS	1.03062	1.0672	1.02851	0.96439	0.978032	0.877453	1.01896	1.06493	0.972958	1.02394	0.935737	0.950213	0.956831	1.00205	1.09908	0.911722
A0A0H3C2J6	Uroporphyrin-III C-methyltransferase/Precorrin-2 dehydrogenase/Sirohydrochlorin ferrochelatase OS=Caulobacter crescentus (strain NA1000 / CB15N) GN=CCNA_00024 PE=4 SV=1 - [A0A0H3C2J6_CAUCN]	CCNA_00024	1.00161	0.938417	1.01541	1.0423	1.03497	0.986798	1.00104	0.958528	0.988187	1.03475	1.04063	0.955002	1.04435	0.986403	1.05625	0.933876
A0A0H3C2L2	RNA-binding protein, YlxR family OS=Caulobacter crescentus (strain NA1000 / CB15N) GN=CCNA_00042 PE=4 SV=1 - [A0A0H3C2L2_CAUCN]	CCNA_00042	0.973746	0.994569	0.983745	0.940062	0.912952	0.942199	1.07777	1.17363	1.00604	1.06266	0.965407	0.946721	0.918322	0.989836	0.997732	0.992086
A0A0H3C2M1	Ferric uptake regulation protein OS=Caulobacter crescentus (strain NA1000 / CB15N) GN=CCNA_00055 PE=3 SV=1 - [A0A0H3C2M1_CAUCN]	CCNA_00055	0.847971	0.883735	0.95555	1.16883	1.27689	1.24148	0.899384	0.83706	1.02406	0.915196	1.37838	1.11895	1.07446	0.887417	0.94148	0.942577
A0A0H3C2M5	Cytochrome p450 OS=Caulobacter crescentus (strain NA1000 / CB15N) GN=CCNA_00061 PE=3 SV=1 - [A0A0H3C2M5_CAUCN]	CCNA_00061	0.939727	1.0917	1.14612	0.736093	0.787228	0.789552	1.12833	1.6682	1.08316	0.948526	0.783305	1.14194	0.676379	0.819921	0.932292	0.879467
A0A0H3C2N3	Uncharacterized protein OS=Caulobacter crescentus (strain NA1000 / CB15N) GN=CCNA_00072 PE=4 SV=1 - [A0A0H3C2N3_CAUCN]	CCNA_00072	1.01036	0.959611	0.995602	1.16868	1.14384	1.10598	0.893246	0.905578	0.903765	0.943581	1.15669	0.957803	0.986382	1.01482	1.05669	0.960382
A0A0H3C2N9	Acyl-CoA dehydrogenase, long-chain specific OS=Caulobacter crescentus (strain NA1000 / CB15N) GN=CCNA_00077 PE=3 SV=1 - [A0A0H3C2N9_CAUCN]	CCNA_00077	0.962654	0.92146	0.963073	0.865771	0.920475	0.906285	1.10459	1.15372	1.07216	1.24518	0.899359	0.861043	0.95741	0.999564	0.955297	1.04634
A0A0H3C2P3	Phosphoglucomutase/phosphomannomutase OS=Caulobacter crescentus (strain NA1000 / CB15N) GN=CCNA_00083 PE=3 SV=1 - [A0A0H3C2P3_CAUCN]	CCNA_00083	0.998946	1.0074	1.02082	0.942862	0.971757	0.971276	1.07391	1.03191	1.01799	1.06413	0.943857	0.956635	1.0407	0.978576	0.970746	1.00807
A0A0H3C2P9	HerA helicase-related ATPase OS=Caulobacter crescentus (strain NA1000 / CB15N) GN=CCNA_00088 PE=4 SV=1 - [A0A0H3C2P9_CAUCN]	CCNA_00088	1.06405	1.0669	1.12011	0.927681	0.912167	0.845049	0.846316	0.933986	1.00413	1.13499	0.871842	0.884702	0.906134	0.949947	1.09778	0.865333
A0A0H3C2R0	Uncharacterized protein OS=Caulobacter crescentus (strain NA1000 / CB15N) GN=CCNA_00098 PE=4 SV=1 - [A0A0H3C2R0_CAUCN]	CCNA_00098	1.15381	0.785711	0.732468	0.898654	0.884777	1.19421	0.906295	1.20921	1.24988	1.07727	0.778855	1.16022	0.749495	1.57524	0.752511	2.09332
A0A0H3C2R7	Gamma-glutamyltranspeptidase OS=Caulobacter crescentus (strain NA1000 / CB15N) GN=CCNA_00103 PE=4 SV=1 - [A0A0H3C2R7_CAUCN]	CCNA_00103	1.08782	1.07074	1.05797	1.05356	0.948676	0.9812	0.86365	0.921427	0.987737	0.991042	0.968498	0.996666	0.937296	1.02822	1.07374	0.957603
A0A0H3C2S2	DNA-binding protein OS=Caulobacter crescentus (strain NA1000 / CB15N) GN=CCNA_00110 PE=4 SV=1 - [A0A0H3C2S2_CAUCN]	CCNA_00110	0.992136	1.10595	1.04667	0.923786	0.939062	0.929268	0.992566	1.02075	1.0113	1.12701	0.931108	0.897325	0.972385	0.9479	0.9941	0.953525
A0A0H3C2S9	TolB protein OS=Caulobacter crescentus (strain NA1000 / CB15N) GN=CCNA_00115 PE=4 SV=1 - [A0A0H3C2S9_CAUCN]	CCNA_00115	1.0795	1.03447	1.00474	1.03807	1.05306	1.09247	0.9494	0.970377	0.925885	0.906992	0.961625	1.02083	0.978383	1.0744	0.950202	1.13071
A0A0H3C2U8	Surface protein OS=Caulobacter crescentus (strain NA1000 / CB15N) GN=CCNA_00134 PE=4 SV=1 - [A0A0H3C2U8_CAUCN]	CCNA_00134	0.983117	0.967802	0.989286	1.11226	1.02154	1.07264	0.987303	0.941871	0.983079	0.967421	1.13137	1.01619	1.04824	0.993764	1.03694	0.958358
A0A0H3C2V8	Non-canonical purine NTP pyrophosphatase OS=Caulobacter crescentus (strain NA1000 / CB15N) GN=CCNA_00145 PE=3 SV=1 - [A0A0H3C2V8_CAUCN]	CCNA_00145	0.929975	0.949062	0.931927	1.07966	1.13186	1.18762	0.934047	1.00294	0.993417	0.927234	1.16096	1.07138	0.931309	0.997906	0.909095	1.09769
A0A0H3C2W3	PDZ domain family protein OS=Caulobacter crescentus (strain NA1000 / CB15N) GN=CCNA_00150 PE=4 SV=1 - [A0A0H3C2W3_CAUCN]	CCNA_00150	0.785021	0.860333	0.867525	1.12043	1.04105	1.1448	0.890751	0.875734	1.37283	1.00728	1.42727	1.36291	1.01715	0.904897	0.978718	0.924574
A0A0H3C2Z8	N-acetylglutamate synthase domain protein OS=Caulobacter crescentus (strain NA1000 / CB15N) GN=CCNA_00191 PE=4 SV=1 - [A0A0H3C2Z8_CAUCN]	CCNA_00191											#DIV/0!	#DIV/0!	#DIV/0!	#DIV/0!	#DIV/0!	#DIV/0!
A0A0H3C302	tRNA (guanine-N(1)-)-methyltransferase OS=Caulobacter crescentus (strain NA1000 / CB15N) GN=trmD PE=3 SV=1 - [A0A0H3C302_CAUCN]	trmD	0.906977	0.967661	1.03385	1.11281	1.17786	1.10007	0.94544	0.917395	0.910671	0.843895	1.22694	1.07913	1.03057	0.87728	1.01158	0.86724
A0A0H3C318	Ribosomal-protein-alanine acetyltransferase OS=Caulobacter crescentus (strain NA1000 / CB15N) GN=CCNA_00213 PE=4 SV=1 - [A0A0H3C318_CAUCN]	CCNA_00213	0.811085	1.04459	0.89569	0.903716	0.959318	0.992927	1.30616	1.00895	1.04806	1.1965	1.11421	0.875938	1.29457	0.905541	0.910154	0.994932
A0A0H3C324	Uncharacterized protein OS=Caulobacter crescentus (strain NA1000 / CB15N) GN=CCNA_00218 PE=4 SV=1 - [A0A0H3C324_CAUCN]	CCNA_00218	0.992134	1.02694	1.01916	0.794808	0.789143	0.740116	1.12957	1.21223	1.0631	1.36811	0.801109	0.777057	0.931814	0.973482	1.0739	0.906495
A0A0H3C339	Uncharacterized protein OS=Caulobacter crescentus (strain NA1000 / CB15N) GN=CCNA_00236 PE=4 SV=1 - [A0A0H3C339_CAUCN]	CCNA_00236	0.935596	0.76029	0.774546	1.02624	0.933215	0.885655	0.950822	1.08315	0.877558	1.59945	1.09688	0.548661	0.87783	1.20793	1.15873	1.04246
A0A0H3C356	Aspartate-semialdehyde dehydrogenase OS=Caulobacter crescentus (strain NA1000 / CB15N) GN=asd PE=3 SV=1 - [A0A0H3C356_CAUCN]	asd	0.963338	0.949348	0.935967	0.945662	0.923977	0.945247	1.07214	1.09426	1.02001	1.17307	0.981651	0.869517	0.97979	1.02924	1.00044	1.02879
A0A0H3C369	C4-dicarboxylate transport protein OS=Caulobacter crescentus (strain NA1000 / CB15N) GN=CCNA_00264 PE=4 SV=1 - [A0A0H3C369_CAUCN]	CCNA_00264	1.02924	0.995742	1.06033	0.977501	0.95754	0.951867	1.09892	1.10419	0.906292	1.04943	0.949734	0.863605	0.995224	0.970672	1.02693	0.945217
A0A0H3C372	Uncharacterized protein OS=Caulobacter crescentus (strain NA1000 / CB15N) GN=CCNA_00271 PE=4 SV=1 - [A0A0H3C372_CAUCN]	CCNA_00271	1.10838	1.19174	1.06061	0.988543	1.0355	0.985878	0.792236	0.88147	0.912488	0.978297	0.891877	0.932732	0.898767	1.04504	1.0027	1.04222
A0A0H3C379	Photosensory histidine protein kinase LovK OS=Caulobacter crescentus (strain NA1000 / CB15N) GN=lovK PE=4 SV=1 - [A0A0H3C379_CAUCN]	lovK	1.02619	0.997816	1.00877	1.04122	1.01695	0.979174	1.02429	0.972731	0.981813	0.926919	1.01465	1.05922	1.053	1.01727	1.06337	0.956648
A0A0H3C383	Phosphate transport system permease protein OS=Caulobacter crescentus (strain NA1000 / CB15N) GN=pstC PE=3 SV=1 - [A0A0H3C383_CAUCN]	pstC	1.11047	1.08081	1.1739	0.87491	0.899406	0.903264	1.04155	0.971097	0.928367	0.987023	0.787873	0.940573	1.07255	0.945964	0.96861	0.97662
A0A0H3C388	Phosphoribosylamine--glycine ligase OS=Caulobacter crescentus (strain NA1000 / CB15N) GN=purD PE=3 SV=1 - [A0A0H3C388_CAUCN]	purD	0.999965	0.886764	1.02102	1.1683	1.03436	1.0999	0.970943	0.968379	0.964723	0.939741	1.16834	1.02658	1.00265	0.979377	1.06219	0.922035
A0A0H3C394	Cobalt-zinc-cadmium resistance protein czcD OS=Caulobacter crescentus (strain NA1000 / CB15N) GN=czcD PE=4 SV=1 - [A0A0H3C394_CAUCN]	czcD	0.900246	0.930071	0.941607	0.952623	1.09355	0.992868	1.05473	1.05583	1.14881	1.04896	1.05818	1.09519	0.998957	0.956074	0.959467	0.996464
A0A0H3C399	3'-phosphoadenosine-5'-phosphosulfate (PAPS) 3'-phosphatase family protein OS=Caulobacter crescentus (strain NA1000 / CB15N) GN=CCNA_00310 PE=4 SV=1 - [A0A0H3C399_CAUCN]	CCNA_00310	0.988727	0.952945	1.04756	0.950342	0.953456	1.05472	1.1935	1.05929	1.07557	1.05179	0.961177	1.0226	1.1267	0.943837	0.901038	1.0475
A0A0H3C3A6	3-polyprenyl-4-hydroxybenzoate decarboxylase OS=Caulobacter crescentus (strain NA1000 / CB15N) GN=CCNA_00315 PE=3 SV=1 - [A0A0H3C3A6_CAUCN]	CCNA_00315	0.962809	0.940331	0.999731	1.02396	1.05753	0.998023	1.02768	1.01651	0.995316	1.04332	1.06351	0.953991	1.01099	0.963068	1.02599	0.938675
A0A0H3C3B1	Low-affinity zinc transport protein OS=Caulobacter crescentus (strain NA1000 / CB15N) GN=CCNA_00323 PE=4 SV=1 - [A0A0H3C3B1_CAUCN]	CCNA_00323	0.895381	0.892919	0.895812	1.05751	1.0637	1.09247	0.983552	0.975269	1.15967	1.08121	1.18108	1.07257	1.00849	0.999519	0.968	1.03256
A0A0H3C3B5	Molybdenum-pterin binding protein mopB OS=Caulobacter crescentus (strain NA1000 / CB15N) GN=mopB PE=4 SV=1 - [A0A0H3C3B5_CAUCN]	mopB	1.06466	1.03057	0.990831	0.99639	1.02903	1.08063	0.885902	1.06177	0.969873	0.935163	0.935874	1.03712	0.834361	1.07452	0.922043	1.16536
A0A0H3C3C4	Succinyl-CoA synthetase alpha chain OS=Caulobacter crescentus (strain NA1000 / CB15N) GN=sucD PE=4 SV=1 - [A0A0H3C3C4_CAUCN]	sucD	1.00588	0.975407	1.00661	1.01096	1.01974	1.01308	0.908447	0.969166	1.03095	1.07153	1.00505	0.962125	0.937349	0.999269	0.997909	1.00136
A0A0H3C3C8	Dihydrolipoyl dehydrogenase OS=Caulobacter crescentus (strain NA1000 / CB15N) GN=CCNA_00346 PE=4 SV=1 - [A0A0H3C3C8_CAUCN]	CCNA_00346	0.980446	0.95892	0.976713	1.0539	1.03934	1.04052	1.00663	0.977459	1.00951	1.04844	1.07492	0.962872	1.02984	1.00382	1.01286	0.991077
A0A0H3C3D4	Primosomal protein N' OS=Caulobacter crescentus (strain NA1000 / CB15N) GN=priA PE=3 SV=1 - [A0A0H3C3D4_CAUCN]	priA	0.98565	0.979022	0.992824	0.919766	0.996002	1.0194	1.07541	1.04667	1.04912	1.03159	0.933156	1.01699	1.02746	0.992774	0.902266	1.10031
A0A0H3C3D8	Outer membrane protein OS=Caulobacter crescentus (strain NA1000 / CB15N) GN=CCNA_00356 PE=4 SV=1 - [A0A0H3C3D8_CAUCN]	CCNA_00356	0.985346	0.90579	0.868059	0.832478	0.903334	0.93542	1.16328	1.21475	1.13209	1.18284	0.844858	0.957094	0.957627	1.13511	0.889951	1.27548
A0A0H3C3E4	Hot dog superfamily thioesterase OS=Caulobacter crescentus (strain NA1000 / CB15N) GN=CCNA_00361 PE=4 SV=1 - [A0A0H3C3E4_CAUCN]	CCNA_00361	1.01739	0.990137	1.00564	0.94925	1.00439	0.959637	0.967545	0.939067	1.07967	1.0851	0.933028	0.994999	1.03033	1.01168	0.989177	1.02275
A0A0H3C3F1	Phosphonates import ATP-binding protein PhnC OS=Caulobacter crescentus (strain NA1000 / CB15N) GN=phnC PE=3 SV=1 - [A0A0H3C3F1_CAUCN]	phnC	0.935487	0.91859	0.91452	1.18203	1.21594	1.2464	0.886892	0.904067	0.97451	0.917003	1.26354	1.06271	0.981002	1.02293	0.948351	1.07864
A0A0H3C3F7	ATP synthase subunit b OS=Caulobacter crescentus (strain NA1000 / CB15N) GN=atpF PE=3 SV=1 - [A0A0H3C3F7_CAUCN]	atpF	1.04387	1.04367	1.02852	0.954118	0.920619	0.944406	1.03585	1.06016	0.969296	1.02357	0.914021	0.946979	0.977077	1.01492	1.01028	1.00459
A0A0H3C3H4	Aminomethyltransferase family protein OS=Caulobacter crescentus (strain NA1000 / CB15N) GN=CCNA_00389 PE=3 SV=1 - [A0A0H3C3H4_CAUCN]	CCNA_00389	0.807968	0.847656	0.824548	1.07519	1.06559	1.17497	0.91326	0.942908	1.22036	1.13844	1.33073	1.07197	0.968557	0.979892	0.915081	1.07083
A0A0H3C3I1	YCII-related domain protein OS=Caulobacter crescentus (strain NA1000 / CB15N) GN=CCNA_00394 PE=4 SV=1 - [A0A0H3C3I1_CAUCN]	CCNA_00394	1.02264	0.999232	1.04591	0.933835	0.984994	0.925009	1.06689	1.1422	0.980019	1.02503	0.913157	0.956092	0.934066	0.977754	1.00954	0.968512
A0A0H3C3I8	Zinc metallohydrolase, glyoxalase II family OS=Caulobacter crescentus (strain NA1000 / CB15N) GN=CCNA_00399 PE=4 SV=1 - [A0A0H3C3I8_CAUCN]	CCNA_00399	1.0666	1.02872	1.09201	0.952649	0.990942	0.9422	0.901915	0.943603	0.974622	1.01451	0.893161	0.960685	0.95582	0.976735	1.01109	0.966022
A0A0H3C3K6	DNA polymerase III, epsilon chain OS=Caulobacter crescentus (strain NA1000 / CB15N) GN=dnaQ PE=4 SV=1 - [A0A0H3C3K6_CAUCN]	dnaQ	0.908778	0.96239	0.842162	1.2687	1.21695	1.09978	0.942978	0.825752	1.02051	0.935608	1.39605	1.09075	1.14196	1.0791	1.15359	0.935426
A0A0H3C3K7	Type 1 glutamine amidotransferase (GATase1) domain protein OS=Caulobacter crescentus (strain NA1000 / CB15N) GN=CCNA_00414 PE=4 SV=1 - [A0A0H3C3K7_CAUCN]	CCNA_00414											#DIV/0!	#DIV/0!	#DIV/0!	#DIV/0!	#DIV/0!	#DIV/0!
A0A0H3C3L0	Molybdenum cofactor biosynthesis protein B OS=Caulobacter crescentus (strain NA1000 / CB15N) GN=moaB PE=3 SV=1 - [A0A0H3C3L0_CAUCN]	moaB	1.01158	0.962733	1.00234	0.97488	0.978187	0.985495	1.0371	0.99658	1.07256	1.03366	0.96372	1.03764	1.04066	1.00922	0.989228	1.02021
A0A0H3C3L3	Uncharacterized protein OS=Caulobacter crescentus (strain NA1000 / CB15N) GN=CCNA_00020 PE=4 SV=1 - [A0A0H3C3L3_CAUCN]	CCNA_00020	0.837087	1.14684	0.967813	0.931828	0.962661	1.05396	1.11352	1.16196	1.03683	0.973937	1.11318	1.06458	0.958312	0.864926	0.88412	0.978291
A0A0H3C3L7	Major facilitator superfamily transporter OS=Caulobacter crescentus (strain NA1000 / CB15N) GN=CCNA_00025 PE=4 SV=1 - [A0A0H3C3L7_CAUCN]	CCNA_00025	1.02675	1.05335	1.11669	0.978125	1.01728	1.0863	1.05313	0.940977	0.881075	0.851085	0.952639	1.03524	1.11919	0.919457	0.90042	1.02114
A0A0H3C3L9	Ribonuclease T2 OS=Caulobacter crescentus (strain NA1000 / CB15N) GN=CCNA_00030 PE=3 SV=1 - [A0A0H3C3L9_CAUCN]	CCNA_00030	0.983691	0.893807	0.933346	1.07587	1.17236	1.17351	0.873178	1.08606	1.00736	0.914978	1.09371	1.10097	0.803986	1.05394	0.916796	1.14959
A0A0H3C3M3	Uncharacterized protein OS=Caulobacter crescentus (strain NA1000 / CB15N) GN=CCNA_00038 PE=4 SV=1 - [A0A0H3C3M3_CAUCN]	CCNA_00038	1.01944	0.936313	1.02009	0.891684	0.924189	0.903111	1.01397	0.983763	1.09061	1.22612	0.874678	0.889481	1.0307	0.999361	0.987347	1.01217
A0A0H3C3M7	Transcription termination/antitermination protein NusA OS=Caulobacter crescentus (strain NA1000 / CB15N) GN=nusA PE=3 SV=1 - [A0A0H3C3M7_CAUCN]	nusA	1.02113	1.00334	1.03445	0.926633	0.943135	0.926208	1.05399	1.09416	1.02966	1.07031	0.907461	0.962025	0.963279	0.987117	1.00046	0.986664
A0A0H3C3N0	Apolipoprotein N-acyltransferase OS=Caulobacter crescentus (strain NA1000 / CB15N) GN=lnt PE=3 SV=1 - [A0A0H3C3N0_CAUCN]	lnt	0.923172	0.947555	0.997175	1.03121	1.15047	0.993954	1.08997	1.0187	0.978562	0.977332	1.11703	1.00126	1.06996	0.925788	1.03748	0.892343
A0A0H3C3N4	Ribosomal-protein-S18-alanine acetyltransferase OS=Caulobacter crescentus (strain NA1000 / CB15N) GN=CCNA_00056 PE=4 SV=1 - [A0A0H3C3N4_CAUCN]	CCNA_00056	1.07541	1.0486	0.953828	0.902988	0.836126	0.81946	1.177	1.09902	1.02349	1.16234	0.839668	0.880537	1.07095	1.12747	1.10193	1.02318
A0A0H3C3N8	Tryptophan--tRNA ligase OS=Caulobacter crescentus (strain NA1000 / CB15N) GN=trpS PE=3 SV=1 - [A0A0H3C3N8_CAUCN]	trpS	1.04814	1.04932	1.05003	0.884315	0.965613	0.853568	1.06523	1.05125	1.01562	1.06619	0.843702	0.952568	1.0133	0.998193	1.03602	0.963487
A0A0H3C3P6	Uncharacterized protein OS=Caulobacter crescentus (strain NA1000 / CB15N) GN=CCNA_00425 PE=4 SV=1 - [A0A0H3C3P6_CAUCN]	CCNA_00425											#DIV/0!	#DIV/0!	#DIV/0!	#DIV/0!	#DIV/0!	#DIV/0!
A0A0H3C3P8	HemY domain membrane protein OS=Caulobacter crescentus (strain NA1000 / CB15N) GN=CCNA_00073 PE=4 SV=1 - [A0A0H3C3P8_CAUCN]	CCNA_00073	1.0033	1.00869	0.979763	1.06827	1.02556	1.04125	0.996527	0.91444	1.04186	0.937624	1.06475	1.11117	1.08977	1.02403	1.02594	0.99813
A0A0H3C3Q3	Acyl-CoA dehydrogenase OS=Caulobacter crescentus (strain NA1000 / CB15N) GN=CCNA_00078 PE=3 SV=1 - [A0A0H3C3Q3_CAUCN]	CCNA_00078	1.0645	1.04914	1.00464	0.823731	0.81473	0.82423	1.09813	1.34141	1.01146	1.12825	0.773822	0.896485	0.818637	1.05958	0.999394	1.06022
A0A0H3C3Q5	Amino acid transporter OS=Caulobacter crescentus (strain NA1000 / CB15N) GN=CCNA_00435 PE=4 SV=1 - [A0A0H3C3Q5_CAUCN]	CCNA_00435	0.955473	0.978793	0.965598	1.04055	1.07289	1.09746	1.10979	0.927077	0.998868	0.945126	1.08904	1.05686	1.19709	0.989514	0.948138	1.04364
A0A0H3C3Q7	Bifunctional purine biosynthesis protein PurH OS=Caulobacter crescentus (strain NA1000 / CB15N) GN=purH PE=3 SV=1 - [A0A0H3C3Q7_CAUCN]	purH	1.04598	1.02388	1.03499	1.04678	1.07039	1.05716	1.14791	1.06255	0.885301	0.797142	1.00077	1.11059	1.08034	1.01061	0.990183	1.02063
A0A0H3C3R0	STAS domain protein OS=Caulobacter crescentus (strain NA1000 / CB15N) GN=CCNA_00440 PE=4 SV=1 - [A0A0H3C3R0_CAUCN]	CCNA_00440	0.980595	0.961569	1.00614	0.958054	1.0288	0.969813	1.05586	1.05263	0.954792	0.972677	0.977013	0.981613	1.00306	0.974614	0.987876	0.986576
A0A0H3C3R5	Chemotaxis response regulator protein-glutamate methylesterase OS=Caulobacter crescentus (strain NA1000 / CB15N) GN=cheB PE=3 SV=1 - [A0A0H3C3R5_CAUCN]	cheB	1.04714	1.06956	1.09932	0.955715	0.949085	0.872588	1.02339	1.03793	0.963954	0.968364	0.912687	0.995446	0.985992	0.95254	1.09526	0.869689
A0A0H3C3R6	WecG/TagA-family glycosyltransferase HfsJ OS=Caulobacter crescentus (strain NA1000 / CB15N) GN=hfsJ PE=3 SV=1 - [A0A0H3C3R6_CAUCN]	hfsJ	1.23561	1.0565	1.02818	0.768731	0.850731	0.679265	1.28189	1.25899	0.882175	1.11698	0.622146	0.789783	1.01819	1.20175	1.13171	1.06189
A0A0H3C3S0	TonB-dependent receptor OS=Caulobacter crescentus (strain NA1000 / CB15N) GN=CCNA_00451 PE=4 SV=1 - [A0A0H3C3S0_CAUCN]	CCNA_00451	1.0841	1.05384	1.11175	0.949965	0.999764	0.99294	0.899017	0.957	0.972472	0.949904	0.876274	1.02376	0.939412	0.975126	0.956719	1.01924
A0A0H3C3S1	FtsZ-binding protein FzlC OS=Caulobacter crescentus (strain NA1000 / CB15N) GN=fzlC PE=4 SV=1 - [A0A0H3C3S1_CAUCN]	fzlC	1.0727	0.912241	0.955161	1.0933	1.05997	1.01464	0.996667	0.968757	0.957418	1.01118	1.01921	0.946836	1.02881	1.12305	1.07753	1.04225
A0A0H3C3S4	Beta-N-acetylhexosaminidase OS=Caulobacter crescentus (strain NA1000 / CB15N) GN=CCNA_00456 PE=4 SV=1 - [A0A0H3C3S4_CAUCN]	CCNA_00456	1.00214	1.05232	1.00956	0.923759	0.855454	0.935403	1.04594	1.37799	0.932598	1.03604	0.921784	0.900155	0.75903	0.992653	0.987552	1.00517
A0A0H3C3T1	Uncharacterized protein OS=Caulobacter crescentus (strain NA1000 / CB15N) GN=CCNA_00111 PE=4 SV=1 - [A0A0H3C3T1_CAUCN]	CCNA_00111	1.05956	1.10818	1.05442	0.941901	0.963641	0.988237	1.02557	1.08183	0.994614	0.87819	0.888956	1.13257	0.947999	1.00487	0.953112	1.05431
A0A0H3C3T2	GT1-family glycosyltransferase OS=Caulobacter crescentus (strain NA1000 / CB15N) GN=CCNA_00469 PE=4 SV=1 - [A0A0H3C3T2_CAUCN]	CCNA_00469	0.956648	0.935539	0.929888	1.12357	1.0988	1.09852	1.08882	0.991165	0.921264	0.952654	1.17448	0.96705	1.09852	1.02878	1.0228	1.00585
A0A0H3C3T5	Glutamine--fructose-6-phosphate aminotransferase [isomerizing] OS=Caulobacter crescentus (strain NA1000 / CB15N) GN=glmS PE=3 SV=1 - [A0A0H3C3T5_CAUCN]	glmS	1.09263	1.02019	1.10694	0.955341	0.905624	0.940215	0.958894	1.00508	0.983174	0.998156	0.874353	0.984991	0.954049	0.987065	1.01609	0.971437
A0A0H3C3U5	Trypsin-like peptidase OS=Caulobacter crescentus (strain NA1000 / CB15N) GN=CCNA_00135 PE=4 SV=1 - [A0A0H3C3U5_CAUCN]	CCNA_00135	1.10329	1.02339	1.0176	1.00837	1.02428	1.02097	0.993247	0.955854	0.924903	0.967926	0.913966	0.955551	1.03912	1.08421	0.987657	1.09776
A0A0H3C3V4	Glutathione synthetase OS=Caulobacter crescentus (strain NA1000 / CB15N) GN=gshB PE=3 SV=1 - [A0A0H3C3V4_CAUCN]	gshB	0.834621	0.871932	0.899181	1.10063	1.10784	1.12886	0.934683	0.879452	1.20747	1.07039	1.31872	1.12806	1.0628	0.928202	0.974992	0.95201
A0A0H3C3W1	Glutathione S-transferase OS=Caulobacter crescentus (strain NA1000 / CB15N) GN=CCNA_00146 PE=4 SV=1 - [A0A0H3C3W1_CAUCN]	CCNA_00146	0.942507	1.00701	0.899257	1.23046	1.08768	1.27597	0.887464	0.89666	0.910765	0.911553	1.30552	0.999135	0.989744	1.0481	0.964333	1.08686
A0A0H3C3X1	Uncharacterized protein OS=Caulobacter crescentus (strain NA1000 / CB15N) GN=CCNA_00162 PE=4 SV=1 - [A0A0H3C3X1_CAUCN]	CCNA_00162	0.89256	0.937379	0.89978	1.02313	1.02377	1.03394	1.08847	1.09237	1.05214	1.04427	1.14628	1.00753	0.996426	0.991976	0.989545	1.00246
A0A0H3C3X4	Pirin OS=Caulobacter crescentus (strain NA1000 / CB15N) GN=CCNA_00514 PE=3 SV=1 - [A0A0H3C3X4_CAUCN]	CCNA_00514	0.746651	0.851294	1.05296	0.951448	0.986089	1.2091	0.928566	1.11536	1.26451	1.02836	1.27429	1.22964	0.832528	0.709098	0.786903	0.901125
A0A0H3C3X6	Metallophosphatase family protein OS=Caulobacter crescentus (strain NA1000 / CB15N) GN=CCNA_00167 PE=4 SV=1 - [A0A0H3C3X6_CAUCN]	CCNA_00167	0.952991	1.02437	0.997303	1.07824	1.13174	1.04227	0.938453	0.967282	0.978077	0.94461	1.13143	1.03543	0.970196	0.955569	1.03451	0.923693
A0A0H3C3Y1	Type II secretion pathway protein D OS=Caulobacter crescentus (strain NA1000 / CB15N) GN=pulD PE=3 SV=1 - [A0A0H3C3Y1_CAUCN]	pulD	1.07159	1.14457	1.17073	0.861222	0.970755	0.807587	0.937265	1.13156	1.03483	0.962191	0.803686	1.0755	0.828298	0.915316	1.06641	0.858312
A0A0H3C3Z8	Long-chain-fatty-acid--CoA ligase OS=Caulobacter crescentus (strain NA1000 / CB15N) GN=CCNA_00192 PE=4 SV=1 - [A0A0H3C3Z8_CAUCN]	CCNA_00192	0.971349	1.04479	0.953854	1.10251	1.1157	1.11898	0.937249	0.945811	0.996947	0.876564	1.13503	1.13734	0.990948	1.01834	0.985281	1.03355
A0A0H3C403	Cupin superfamily protein OS=Caulobacter crescentus (strain NA1000 / CB15N) GN=CCNA_00552 PE=4 SV=1 - [A0A0H3C403_CAUCN]	CCNA_00552	0.984318	1.06491	0.787177	1.07401	1.00578	1.22371	1.12819	1.06104	0.96746	0.835658	1.09113	1.15772	1.06329	1.25044	0.877668	1.42473
A0A0H3C404	TadG/vWA-family protein OS=Caulobacter crescentus (strain NA1000 / CB15N) GN=CCNA_00199 PE=4 SV=1 - [A0A0H3C404_CAUCN]	CCNA_00199	1.13731	0.94867	1.10778	0.920241	1.01561	0.887723	1.17652	1.00694	0.933527	1.01046	0.809135	0.923865	1.16841	1.02667	1.03663	0.990386
A0A0H3C408	Endonuclease/exonuclease/phosphatase family protein OS=Caulobacter crescentus (strain NA1000 / CB15N) GN=CCNA_00557 PE=4 SV=1 - [A0A0H3C408_CAUCN]	CCNA_00557	0.933486	0.855308	0.946464	1.07805	1.08507	1.08336	1.09061	1.19711	1.0056	0.926739	1.15487	1.08509	0.911042	0.986289	0.995106	0.99114
A0A0H3C409	Glutathione-regulated potassium-efflux system protein kefB OS=Caulobacter crescentus (strain NA1000 / CB15N) GN=kefB PE=3 SV=1 - [A0A0H3C409_CAUCN]	kefB	0.938485	0.962658	1.08775	1.0035	1.00116	0.917981	1.00878	1.05023	0.920371	1.1495	1.06927	0.800672	0.960529	0.862773	1.09315	0.78925
A0A0H3C414	SNARE-associated family membrane protein OS=Caulobacter crescentus (strain NA1000 / CB15N) GN=CCNA_00563 PE=4 SV=1 - [A0A0H3C414_CAUCN]	CCNA_00563	0.850921	0.845569	1.06652	1.0797	0.944255	1.05098	1.07588	1.16467	1.08161	1.00052	1.26886	1.08104	0.923769	0.797851	1.02733	0.776628
A0A0H3C421	TonB-dependent receptor OS=Caulobacter crescentus (strain NA1000 / CB15N) GN=CCNA_00214 PE=3 SV=1 - [A0A0H3C421_CAUCN]	CCNA_00214	1.29127	1.36903	1.27445	0.872454	0.921971	0.855857	1.16889	1.12841	0.652718	0.61363	0.675654	1.0637	1.03588	1.0132	1.01939	0.993927
A0A0H3C423	TonB-dependent receptor OS=Caulobacter crescentus (strain NA1000 / CB15N) GN=CCNA_00573 PE=4 SV=1 - [A0A0H3C423_CAUCN]	CCNA_00573	1.01586	1.09208	0.97056	0.913355	1.07391	0.990953	0.955797	0.958331	1.05218	1.0551	0.899098	0.997235	0.997356	1.04667	0.921694	1.1356
A0A0H3C425	Thiol-disulfide isomerase and thioredoxin OS=Caulobacter crescentus (strain NA1000 / CB15N) GN=CCNA_00220 PE=4 SV=1 - [A0A0H3C425_CAUCN]	CCNA_00220	1.12556	1.11834	1.06678	1.20796	1.121	1.07112	0.816641	0.75518	0.825017	0.833439	1.07321	0.989895	1.08139	1.0551	1.12776	0.935575
A0A0H3C429	Methyltransferase OS=Caulobacter crescentus (strain NA1000 / CB15N) GN=CCNA_00227 PE=4 SV=1 - [A0A0H3C429_CAUCN]	CCNA_00227	0.950467	0.862658	0.97336	1.09803	1.16323	1.12579	0.992684	1.02813	1.00708	0.929664	1.15525	1.08327	0.965527	0.97648	0.975338	1.00117
A0A0H3C432	LytR/AlgR-family transcriptional regulator OS=Caulobacter crescentus (strain NA1000 / CB15N) GN=CCNA_00586 PE=4 SV=1 - [A0A0H3C432_CAUCN]	CCNA_00586	0.860939	0.771025	0.812474	1.37446	1.2918	1.41465	1.01542	0.887163	0.838718	0.879512	1.59647	0.953617	1.14457	1.05965	0.971595	1.09063
A0A0H3C433	Uncharacterized protein OS=Caulobacter crescentus (strain NA1000 / CB15N) GN=CCNA_00232 PE=4 SV=1 - [A0A0H3C433_CAUCN]	CCNA_00232	1.07932	1.14092	0.966292	0.862074	0.894813	0.85744	1.10951	1.12977	1.04363	1.01765	0.798723	1.02553	0.982067	1.11697	1.0054	1.11096
A0A0H3C437	Two-component response regulator chvI OS=Caulobacter crescentus (strain NA1000 / CB15N) GN=chvI PE=4 SV=1 - [A0A0H3C437_CAUCN]	chvI	0.97622	0.944652	0.967934	0.910277	0.915919	0.954478	1.0583	0.937111	1.03475	1.2464	0.932451	0.830195	1.12933	1.00856	0.953691	1.05753
A0A0H3C440	RpoE-family sigma factor OS=Caulobacter crescentus (strain NA1000 / CB15N) GN=CCNA_00596 PE=3 SV=1 - [A0A0H3C440_CAUCN]	CCNA_00596	0.971811	0.911268	1.06987	0.940813	0.923818	0.924479	1.1281	1.21909	1.01539	1.06247	0.968103	0.955691	0.925359	0.908342	1.01767	0.892572
A0A0H3C446	SCO1/SenC family protein OS=Caulobacter crescentus (strain NA1000 / CB15N) GN=CCNA_00249 PE=4 SV=1 - [A0A0H3C446_CAUCN]	CCNA_00249	0.992608	0.959314	1.0512	0.903487	0.961397	0.982998	1.04592	1.13655	0.985003	1.09765	0.910216	0.897371	0.920266	0.944258	0.919114	1.02736
A0A0H3C456	Glutathione S-transferase OS=Caulobacter crescentus (strain NA1000 / CB15N) GN=CCNA_00260 PE=4 SV=1 - [A0A0H3C456_CAUCN]	CCNA_00260	0.879075	0.916894	0.866912	1.26605	1.27583	1.38129	0.934905	0.915612	0.955914	0.784986	1.44021	1.21775	1.02107	1.01403	0.916575	1.10632
A0A0H3C461	AMP nucleosidase OS=Caulobacter crescentus (strain NA1000 / CB15N) GN=amn PE=3 SV=1 - [A0A0H3C461_CAUCN]	amn	0.988911	0.981744	1.02528	0.903096	0.963785	0.942832	1.1267	1.10068	0.959762	1.03718	0.913223	0.925356	1.02364	0.964525	0.957854	1.00696
A0A0H3C465	RmuC family protein OS=Caulobacter crescentus (strain NA1000 / CB15N) GN=CCNA_00272 PE=4 SV=1 - [A0A0H3C465_CAUCN]	CCNA_00272	0.923589	0.907578	0.976701	1.05465	1.06654	1.0845	1.00138	1.06604	1.01717	1.05215	1.14191	0.966753	0.939346	0.945621	0.972475	0.972385
A0A0H3C471	Conserved cell surface protein OS=Caulobacter crescentus (strain NA1000 / CB15N) GN=CCNA_00282 PE=4 SV=1 - [A0A0H3C471_CAUCN]	CCNA_00282											#DIV/0!	#DIV/0!	#DIV/0!	#DIV/0!	#DIV/0!	#DIV/0!
A0A0H3C475	ABC-type sulfate transport system, periplasmic component OS=Caulobacter crescentus (strain NA1000 / CB15N) GN=CCNA_00288 PE=4 SV=1 - [A0A0H3C475_CAUCN]	CCNA_00288	0.903475	0.957053	0.955233	0.990711	1.06885	1.12027	0.983742	1.01257	1.04989	1.0046	1.09656	1.04509	0.971526	0.945816	0.884351	1.0695
A0A0H3C480	Phosphate transport system permease protein PstA OS=Caulobacter crescentus (strain NA1000 / CB15N) GN=pstA PE=3 SV=1 - [A0A0H3C480_CAUCN]	pstA	1.1039	1.11337	1.14291	0.866783	0.889201	0.856392	1.0302	0.927867	0.995583	1.07574	0.785202	0.925483	1.11029	0.96587	1.01213	0.954291
A0A0H3C483	Heme:hemopexin-binding protein OS=Caulobacter crescentus (strain NA1000 / CB15N) GN=CCNA_00638 PE=4 SV=1 - [A0A0H3C483_CAUCN]	CCNA_00638	1.08818	1.10743	1.06293	0.954163	1.03095	0.967611	0.961886	1.08512	0.9232	0.821553	0.876844	1.12372	0.886435	1.02375	0.986101	1.03818
A0A0H3C490	Enoyl-CoA hydratase OS=Caulobacter crescentus (strain NA1000 / CB15N) GN=CCNA_00006 PE=3 SV=1 - [A0A0H3C490_CAUCN]	CCNA_00006	0.975986	0.967355	0.976577	1.1468	1.14636	1.16767	0.881753	0.844045	0.956284	0.927141	1.17502	1.03143	1.04467	0.999395	0.982128	1.01758
A0A0H3C491	Lysophospholipid acyltransferase OS=Caulobacter crescentus (strain NA1000 / CB15N) GN=CCNA_00306 PE=4 SV=1 - [A0A0H3C491_CAUCN]	CCNA_00306	1.05061	1.06498	1.05122	0.879416	0.966987	0.909316	0.953537	0.969218	1.04326	1.12045	0.837052	0.931103	0.983822	0.999421	0.967118	1.0334
A0A0H3C495	Zn-dependent protease family protein OS=Caulobacter crescentus (strain NA1000 / CB15N) GN=CCNA_00311 PE=4 SV=1 - [A0A0H3C495_CAUCN]	CCNA_00311	0.985309	1.02679	0.986762	0.926573	0.971366	0.940633	1.03028	1.08534	1.03779	1.11136	0.940388	0.933798	0.949273	0.998528	0.985053	1.01368
A0A0H3C499	Uncharacterized protein OS=Caulobacter crescentus (strain NA1000 / CB15N) GN=CCNA_00318 PE=4 SV=1 - [A0A0H3C499_CAUCN]	CCNA_00318	1.11999	0.934556	0.927359	0.995169	0.906437	0.912935	1.12021	1.09365	0.978624	1.05045	0.888548	0.931626	1.02428	1.20772	1.09008	1.10793
A0A0H3C4A2	Putative aerobic-type carbon monoxide dehydrogenase, large subunit CoxL OS=Caulobacter crescentus (strain NA1000 / CB15N) GN=CCNA_00021 PE=4 SV=1 - [A0A0H3C4A2_CAUCN]	CCNA_00021	0.952782	0.884654	0.93734	0.973592	1.03645	0.988215	0.980995	0.959044	1.25096	1.03567	1.02184	1.20787	1.02289	1.01647	0.985203	1.03174
A0A0H3C4A4	ExbD-family protein OS=Caulobacter crescentus (strain NA1000 / CB15N) GN=CCNA_00324 PE=3 SV=1 - [A0A0H3C4A4_CAUCN]	CCNA_00324	1.06861	1.07373	1.09253	0.960577	0.959661	0.983978	1.00314	0.981462	0.943894	0.97276	0.898907	0.970325	1.02209	0.978098	0.976218	1.00193
A0A0H3C4A5	5-methylcytosine-specific restriction enzyme MRR OS=Caulobacter crescentus (strain NA1000 / CB15N) GN=CCNA_00658 PE=4 SV=1 - [A0A0H3C4A5_CAUCN]	CCNA_00658	1.03702	1.04423	1.08136	0.937626	0.949857	0.973701	1.0236	0.995213	0.996886	0.960813	0.904152	1.03754	1.02853	0.959003	0.96295	0.995901
A0A0H3C4B5	2-oxoglutarate dehydrogenase E1 component OS=Caulobacter crescentus (strain NA1000 / CB15N) GN=odhA PE=4 SV=1 - [A0A0H3C4B5_CAUCN]	odhA	0.955483	0.95233	0.961259	1.05393	1.03738	1.03983	0.966047	0.966085	1.00819	1.09559	1.10303	0.920219	0.999961	0.993991	1.01356	0.980694
A0A0H3C4C1	Glycosyltransferase family 99 protein WbsX OS=Caulobacter crescentus (strain NA1000 / CB15N) GN=CCNA_00669 PE=4 SV=1 - [A0A0H3C4C1_CAUCN]	CCNA_00669	0.935622	0.961384	0.944364	1.01121	1.02469	1.00588	1.01586	0.990551	1.03044	1.04761	1.08078	0.983608	1.02555	0.990743	1.0053	0.985523
A0A0H3C4C3	Uncharacterized protein OS=Caulobacter crescentus (strain NA1000 / CB15N) GN=CCNA_00039 PE=4 SV=1 - [A0A0H3C4C3_CAUCN]	CCNA_00039	1.03383	0.92612	1.09322	0.863392	1.00716	0.874472	1.06335	1.05108	1.0364	1.0971	0.835138	0.944671	1.01167	0.945675	0.987329	0.957811
A0A0H3C4C4	Integral membrane protein OS=Caulobacter crescentus (strain NA1000 / CB15N) GN=CCNA_00352 PE=4 SV=1 - [A0A0H3C4C4_CAUCN]	CCNA_00352	0.954305	0.97291	1.031	0.953828	1.01097	0.990055	1.12351	1.0637	1.03002	1.00108	0.9995	1.02891	1.05622	0.92561	0.963409	0.960765
A0A0H3C4C5	NAD(FAD)-utilizing dehydrogenase OS=Caulobacter crescentus (strain NA1000 / CB15N) GN=CCNA_00674 PE=4 SV=1 - [A0A0H3C4C5_CAUCN]	CCNA_00674	1.01851	1.02396	0.973954	0.977403	0.8824	0.965087	1.05958	1.1382	0.938607	1.031	0.959643	0.910381	0.930929	1.04574	1.01276	1.03257
A0A0H3C4C7	Secretory tripeptidyl aminopeptidase OS=Caulobacter crescentus (strain NA1000 / CB15N) GN=CCNA_00357 PE=4 SV=1 - [A0A0H3C4C7_CAUCN]	CCNA_00357	1.0246	0.979582	0.987311	0.975186	0.9808	0.962136	1.01624	1.00835	1.08277	1.07973	0.951769	1.00281	1.00783	1.03777	1.01356	1.02388
A0A0H3C4C9	Inorganic pyrophosphatase OS=Caulobacter crescentus (strain NA1000 / CB15N) GN=ppa PE=3 SV=1 - [A0A0H3C4C9_CAUCN]	ppa	0.985499	0.980743	1.0126	1.00941	1.02296	1.04235	0.969927	1.02232	0.956217	1.04276	1.02426	0.917008	0.948754	0.973241	0.968395	1.005
A0A0H3C4D3	Zinc uptake regulation protein OS=Caulobacter crescentus (strain NA1000 / CB15N) GN=CCNA_00362 PE=3 SV=1 - [A0A0H3C4D3_CAUCN]	CCNA_00362	0.909799	0.952458	0.939377	1.05911	1.05637	1.08783	0.841541	0.820993	1.26676	1.09279	1.16411	1.1592	1.02503	0.968513	0.973592	0.994783
A0A0H3C4D4	Magnesium and cobalt efflux protein CorC OS=Caulobacter crescentus (strain NA1000 / CB15N) GN=corC PE=4 SV=1 - [A0A0H3C4D4_CAUCN]	corC	1.04424	0.97576	1.00111	0.89815	0.889645	0.948114	1.08616	1.14929	1.04423	1.11639	0.860096	0.935362	0.945069	1.04308	0.947302	1.10111
A0A0H3C4D5	Peptidase family S41 protein OS=Caulobacter crescentus (strain NA1000 / CB15N) GN=CCNA_00686 PE=4 SV=1 - [A0A0H3C4D5_CAUCN]	CCNA_00686	0.835526	1.18061	0.928131	0.994788	1.01864	1.11541	1.16371	0.73621	0.991416	1.08116	1.19061	0.916996	1.58068	0.900224	0.891856	1.00938
A0A0H3C4D8	Phosphonates-binding protein OS=Caulobacter crescentus (strain NA1000 / CB15N) GN=CCNA_00367 PE=4 SV=1 - [A0A0H3C4D8_CAUCN]	CCNA_00367	0.928455	0.90672	0.919119	1.16161	1.16861	1.15638	0.928567	0.890311	0.990097	0.947175	1.25112	1.04532	1.04297	1.01016	1.00452	1.00561
A0A0H3C4D9	Glycoprotease family protein OS=Caulobacter crescentus (strain NA1000 / CB15N) GN=CCNA_00057 PE=4 SV=1 - [A0A0H3C4D9_CAUCN]	CCNA_00057	0.978705	1.00414	1.04462	0.833333	1.03957	0.961793	1.04035	1.10208	1.00809	1.1081	0.851465	0.909742	0.943988	0.936903	0.866436	1.08133
A0A0H3C4E0	Ferredoxin OS=Caulobacter crescentus (strain NA1000 / CB15N) GN=CCNA_00691 PE=4 SV=1 - [A0A0H3C4E0_CAUCN]	CCNA_00691											#DIV/0!	#DIV/0!	#DIV/0!	#DIV/0!	#DIV/0!	#DIV/0!
A0A0H3C4E3	ATP synthase C chain OS=Caulobacter crescentus (strain NA1000 / CB15N) GN=CCNA_00372 PE=4 SV=1 - [A0A0H3C4E3_CAUCN]	CCNA_00372	1.00196	0.957591	0.971454	1.04088	1.15195	1.07188	0.943678	1.03825	0.949102	0.971465	1.03884	0.976981	0.908913	1.0314	0.971077	1.06212
A0A0H3C4E4	Putative lipid II flippase MurJ OS=Caulobacter crescentus (strain NA1000 / CB15N) GN=mviN PE=3 SV=1 - [A0A0H3C4E4_CAUCN]	mviN	1.0191	0.953413	1.07835	1.05418	0.996951	0.995546	1.05257	1.07756	0.931899	1.03023	1.03442	0.904556	0.976816	0.945058	1.0589	0.892493
A0A0H3C4E5	O6-methylguanine-DNA methyltransferase OS=Caulobacter crescentus (strain NA1000 / CB15N) GN=CCNA_00696 PE=4 SV=1 - [A0A0H3C4E5_CAUCN]	CCNA_00696											#DIV/0!	#DIV/0!	#DIV/0!	#DIV/0!	#DIV/0!	#DIV/0!
A0A0H3C4E8	Glycerol-3-phosphate dehydrogenase [NAD(P)+] OS=Caulobacter crescentus (strain NA1000 / CB15N) GN=gpsA PE=3 SV=1 - [A0A0H3C4E8_CAUCN]	gpsA	0.982209	0.994983	0.993234	1.06733	0.971575	0.961255	0.94273	1.01188	1.10902	1.04613	1.08666	1.06011	0.931658	0.9889	1.11035	0.890624
A0A0H3C4F0	Thiol:disulfide interchange protein dsbA OS=Caulobacter crescentus (strain NA1000 / CB15N) GN=CCNA_00378 PE=4 SV=1 - [A0A0H3C4F0_CAUCN]	CCNA_00378	1.04853	1.0851	1.06715	0.917971	0.878526	0.862315	0.958029	1.09032	1.00779	1.10364	0.875487	0.913157	0.878664	0.982549	1.06454	0.922978
A0A0H3C4F3	Multifunctional fatty acid oxidation complex subunit alpha FadJ OS=Caulobacter crescentus (strain NA1000 / CB15N) GN=CCNA_00074 PE=4 SV=1 - [A0A0H3C4F3_CAUCN]	CCNA_00074	1.02066	0.934203	0.99123	0.917047	0.880616	0.870874	1.10222	1.23168	0.997948	1.16253	0.898486	0.858424	0.894891	1.02969	1.05302	0.977845
A0A0H3C4F7	MerR-family transcriptional regulator OS=Caulobacter crescentus (strain NA1000 / CB15N) GN=CCNA_00079 PE=4 SV=1 - [A0A0H3C4F7_CAUCN]	CCNA_00079	0.952582	1.06213	0.89442	1.07522	0.989249	1.03617	0.901656	0.841436	1.11179	0.849201	1.12874	1.30922	1.07157	1.06503	1.03768	1.02635
A0A0H3C4G2	Dienelactone hydrolase-related protein OS=Caulobacter crescentus (strain NA1000 / CB15N) GN=CCNA_00085 PE=4 SV=1 - [A0A0H3C4G2_CAUCN]	CCNA_00085											#DIV/0!	#DIV/0!	#DIV/0!	#DIV/0!	#DIV/0!	#DIV/0!
A0A0H3C4G4	ADP-heptose--LPS heptosyltransferase OS=Caulobacter crescentus (strain NA1000 / CB15N) GN=CCNA_00390 PE=4 SV=1 - [A0A0H3C4G4_CAUCN]	CCNA_00390	0.883013	0.912834	0.868852	1.21863	1.15354	1.19843	0.917237	0.919821	0.989509	0.930852	1.38008	1.06301	0.997191	1.0163	1.01686	0.999449
A0A0H3C4G6	UDP-glucose 4-epimerase OS=Caulobacter crescentus (strain NA1000 / CB15N) GN=CCNA_00090 PE=4 SV=1 - [A0A0H3C4G6_CAUCN]	CCNA_00090	0.991433	0.985695	0.990234	1.04456	1.08993	0.9998	1.05947	1.03528	0.983547	0.958131	1.05359	1.02653	1.02336	1.00121	1.04477	0.958308
A0A0H3C4G8	GumN superfamily protein OS=Caulobacter crescentus (strain NA1000 / CB15N) GN=CCNA_00732 PE=4 SV=1 - [A0A0H3C4G8_CAUCN]	CCNA_00732	0.942592	1.03866	1.01095	0.963958	1.05304	1.00884	1.01625	1.0073	1.02501	0.909929	1.02267	1.12647	1.00889	0.932378	0.955513	0.975788
A0A0H3C4G9	Feruloyl-CoA synthetase OS=Caulobacter crescentus (strain NA1000 / CB15N) GN=CCNA_00395 PE=4 SV=1 - [A0A0H3C4G9_CAUCN]	CCNA_00395	0.965192	0.979194	0.95011	1.01708	0.987198	1.07092	1.04248	1.01141	1.05324	1.09888	1.05376	0.958461	1.03073	1.01587	0.94972	1.06966
A0A0H3C4H1	Quinone oxidoreductase OS=Caulobacter crescentus (strain NA1000 / CB15N) GN=CCNA_00095 PE=4 SV=1 - [A0A0H3C4H1_CAUCN]	CCNA_00095	0.942131	0.896324	0.991432	1.10063	1.05796	1.05329	0.849963	0.901359	1.09596	1.12506	1.16824	0.974135	0.942979	0.950274	1.04495	0.909398
A0A0H3C4H2	Isoleucine--tRNA ligase OS=Caulobacter crescentus (strain NA1000 / CB15N) GN=ileS PE=3 SV=1 - [A0A0H3C4H2_CAUCN]	ileS	1.03211	1.0074	1.04579	0.924714	0.913904	0.927202	1.03473	1.06307	1.00397	1.10225	0.895943	0.910837	0.973343	0.986918	0.997317	0.989574
A0A0H3C4H5	Ribulose-phosphate 3-epimerase OS=Caulobacter crescentus (strain NA1000 / CB15N) GN=CCNA_00100 PE=3 SV=1 - [A0A0H3C4H5_CAUCN]	CCNA_00100	0.95397	0.94477	1.02648	0.943748	0.951176	0.973227	0.985177	0.971977	1.16469	1.12302	0.989285	1.03711	1.01358	0.929359	0.969711	0.958387
A0A0H3C4H9	2-polyprenyl-6-methoxyphenol hydroxylase OS=Caulobacter crescentus (strain NA1000 / CB15N) GN=CCNA_00106 PE=4 SV=1 - [A0A0H3C4H9_CAUCN]	CCNA_00106	0.995158	0.990403	0.983856	1.01157	0.985112	0.962893	1.04139	1.00396	1.04548	1.02187	1.01649	1.0231	1.03728	1.01149	1.05055	0.962818
A0A0H3C4I2	Short chain dehydrogenase OS=Caulobacter crescentus (strain NA1000 / CB15N) GN=CCNA_00405 PE=4 SV=1 - [A0A0H3C4I2_CAUCN]	CCNA_00405	1.02645	1.13198	0.99204	1.02767	1.09681	1.04774	0.869056	1.10794	0.89955	0.896138	1.00119	1.00381	0.784387	1.03468	0.980836	1.0549
A0A0H3C4I3	Ferrous iron transport protein A OS=Caulobacter crescentus (strain NA1000 / CB15N) GN=CCNA_00748 PE=4 SV=1 - [A0A0H3C4I3_CAUCN]	CCNA_00748	0.961251	1.03363	0.994621	0.979402	1.01414	1.0167	0.980554	1.0312	0.948543	1.00416	1.01888	0.944616	0.950882	0.96645	0.963317	1.00325
A0A0H3C4I7	Lysine 2,3-aminomutase OS=Caulobacter crescentus (strain NA1000 / CB15N) GN=CCNA_00753 PE=4 SV=1 - [A0A0H3C4I7_CAUCN]	CCNA_00753	0.961479	1.05772	0.968765	0.999632	0.935512	1.00275	1.13816	1.0642	0.964116	1.01508	1.03968	0.949789	1.0695	0.99248	0.996892	0.995574
A0A0H3C4I8	Acetyltransferase OS=Caulobacter crescentus (strain NA1000 / CB15N) GN=CCNA_00410 PE=4 SV=1 - [A0A0H3C4I8_CAUCN]	CCNA_00410											#DIV/0!	#DIV/0!	#DIV/0!	#DIV/0!	#DIV/0!	#DIV/0!
A0A0H3C4J0	3-hydroxyacyl CoA dehydrogenase OS=Caulobacter crescentus (strain NA1000 / CB15N) GN=CCNA_00123 PE=3 SV=1 - [A0A0H3C4J0_CAUCN]	CCNA_00123	1.03775	1.02406	1.05957	1.03479	1.04108	1.02787	0.829398	0.910797	1.00784	0.957228	0.997146	1.05287	0.910629	0.979413	1.00673	0.972866
A0A0H3C4J4	Uncharacterized protein OS=Caulobacter crescentus (strain NA1000 / CB15N) GN=CCNA_00415 PE=4 SV=1 - [A0A0H3C4J4_CAUCN]	CCNA_00415	0.834251	0.852747	0.857196	1.40756	1.41026	1.42971	0.867603	0.771337	0.968803	0.701102	1.68721	1.38183	1.1248	0.973232	0.984508	0.988546
A0A0H3C4J9	AmpG protein OS=Caulobacter crescentus (strain NA1000 / CB15N) GN=CCNA_00136 PE=4 SV=1 - [A0A0H3C4J9_CAUCN]	CCNA_00136	1.00858	1.09621	1.11777	0.999406	0.986022	0.966662	0.923285	0.971015	1.0301	0.921812	0.990908	1.11747	0.950846	0.902314	1.03387	0.872752
A0A0H3C4K0	Electron transfer flavoprotein beta subunit OS=Caulobacter crescentus (strain NA1000 / CB15N) GN=CCNA_00764 PE=4 SV=1 - [A0A0H3C4K0_CAUCN]	CCNA_00764	0.93184	0.91828	0.977795	1.08296	1.06285	1.08924	0.87026	0.923026	1.02816	1.07884	1.16217	0.953025	0.942834	0.953002	0.994236	0.958526
A0A0H3C4K3	Tetratricopeptide repeat family protein OS=Caulobacter crescentus (strain NA1000 / CB15N) GN=CCNA_00141 PE=4 SV=1 - [A0A0H3C4K3_CAUCN]	CCNA_00141	0.916337	0.977974	0.923772	1.09602	1.14366	1.12437	0.98715	1.03788	1.03654	0.918629	1.19609	1.12836	0.951123	0.991952	0.974788	1.01761
A0A0H3C4K4	TetR family transcriptional regulator OS=Caulobacter crescentus (strain NA1000 / CB15N) GN=CCNA_00769 PE=4 SV=1 - [A0A0H3C4K4_CAUCN]	CCNA_00769	0.96679	0.948706	0.919636	0.978478	0.952034	0.974532	1.00556	1.15481	1.05768	1.09157	1.01209	0.968954	0.870754	1.05128	1.00405	1.04704
A0A0H3C4K9	Aspartate aminotransferase OS=Caulobacter crescentus (strain NA1000 / CB15N) GN=CCNA_00775 PE=4 SV=1 - [A0A0H3C4K9_CAUCN]	CCNA_00775	0.963573	0.959687	1.09452	1.33552	0.953471	1.03396	0.956419	0.855639	0.877825	0.959129	1.386	0.915232	1.11778	0.880363	1.29165	0.681578
A0A0H3C4L3	N-formylglutamate deformylase OS=Caulobacter crescentus (strain NA1000 / CB15N) GN=CCNA_00780 PE=4 SV=1 - [A0A0H3C4L3_CAUCN]	CCNA_00780	0.994822	0.9503	1.06973	1.04292	1.13399	1.02382	0.838485	1.01056	1.00099	0.948747	1.04835	1.05507	0.829725	0.929972	1.01866	0.91294
A0A0H3C4L4	Exopolysaccharide transport family protein OS=Caulobacter crescentus (strain NA1000 / CB15N) GN=CCNA_00163 PE=4 SV=1 - [A0A0H3C4L4_CAUCN]	CCNA_00163	0.95725	0.97918	0.976242	0.99941	0.995367	0.97817	1.14581	1.09839	0.976906	1.0234	1.04404	0.954565	1.04317	0.980545	1.02171	0.959706
A0A0H3C4L6	tRNA 5-methylaminomethyl-2-thiouridine biosynthesis bifunctional protein MnmC OS=Caulobacter crescentus (strain NA1000 / CB15N) GN=mnmC PE=3 SV=1 - [A0A0H3C4L6_CAUCN]	mnmC	1.04597	0.985193	1.03589	0.918277	0.908513	0.952718	1.03839	1.00274	1.03805	1.10533	0.877919	0.939133	1.03556	1.00973	0.963849	1.04761
A0A0H3C4L8	Polysaccharide export protein OS=Caulobacter crescentus (strain NA1000 / CB15N) GN=CCNA_00168 PE=4 SV=1 - [A0A0H3C4L8_CAUCN]	CCNA_00168	1.17763	1.1158	0.997946	0.979864	0.941348	0.904055	1.04666	1.00866	0.917924	0.946389	0.832066	0.969922	1.03768	1.18005	1.08385	1.08875
A0A0H3C4M2	Type II secretion pathway protein E OS=Caulobacter crescentus (strain NA1000 / CB15N) GN=pulE PE=4 SV=1 - [A0A0H3C4M2_CAUCN]	pulE	0.87862	1.25976	1.0313	1.03869	0.98033	1.00841	0.945526	0.858285	0.980785	1.02197	1.18218	0.959698	1.10165	0.851957	1.03003	0.82712
A0A0H3C4M3	7,8-dihydroneopterin aldolase OS=Caulobacter crescentus (strain NA1000 / CB15N) GN=CCNA_00421 PE=3 SV=1 - [A0A0H3C4M3_CAUCN]	CCNA_00421	1.07085	1.10559	1.05897	0.894739	1.0027	0.956052	0.990231	0.969239	0.955765	0.988059	0.835539	0.967316	1.02166	1.01122	0.935868	1.08052
A0A0H3C4M4	ABC transporter, ATP-binding protein cydC OS=Caulobacter crescentus (strain NA1000 / CB15N) GN=cydC PE=4 SV=1 - [A0A0H3C4M4_CAUCN]	cydC	0.727058	1.1021	1.07528	1.08265	1.32398	1.29539	0.783327	0.726035	1.05046	0.85524	1.48909	1.22827	1.07891	0.676159	0.835774	0.809021
A0A0H3C4M8	Chemotaxis protein cheW OS=Caulobacter crescentus (strain NA1000 / CB15N) GN=CCNA_00803 PE=4 SV=1 - [A0A0H3C4M8_CAUCN]	CCNA_00803	1.04382	0.957282	0.885106	1.02635	0.980622	1.0261	1.10147	1.10876	0.964931	1.02855	0.983261	0.938147	0.993418	1.17932	1.00024	1.17904
A0A0H3C4N4	ABC transporter ATP-binding protein OS=Caulobacter crescentus (strain NA1000 / CB15N) GN=CCNA_00188 PE=4 SV=1 - [A0A0H3C4N4_CAUCN]	CCNA_00188	0.830199	0.839806	0.835581	1.1105	1.07989	1.06647	0.886184	0.864979	1.22233	1.0998	1.33763	1.11141	1.02451	0.993558	1.04129	0.954159
A0A0H3C4N5	L-sorbosone dehydrogenase OS=Caulobacter crescentus (strain NA1000 / CB15N) GN=CCNA_00817 PE=4 SV=1 - [A0A0H3C4N5_CAUCN]	CCNA_00817	1.16502	0.993537	1.13273	0.971678	0.900401	0.90997	0.853228	1.0275	1.01655	1.00869	0.834044	1.00779	0.83039	1.02851	1.06781	0.96319
A0A0H3C4N6	Acyl-CoA dehydrogenase, short-chain specific OS=Caulobacter crescentus (strain NA1000 / CB15N) GN=CCNA_00436 PE=3 SV=1 - [A0A0H3C4N6_CAUCN]	CCNA_00436	0.981126	0.879964	1.04061	0.968739	0.997211	1.0373	0.90932	1.0384	1.13656	1.05986	0.987375	1.07236	0.875694	0.942834	0.933909	1.00956
A0A0H3C4N8	3-isopropylmalate dehydrogenase OS=Caulobacter crescentus (strain NA1000 / CB15N) GN=leuB PE=3 SV=1 - [A0A0H3C4N8_CAUCN]	leuB	0.871544	0.874508	0.897342	1.20266	1.09453	1.20484	0.92585	0.908004	1.03786	0.969769	1.37992	1.07021	1.01965	0.97125	0.998188	0.973013
A0A0H3C4N9	Chemotaxis receiver domain protein cheYI OS=Caulobacter crescentus (strain NA1000 / CB15N) GN=cheYI PE=4 SV=1 - [A0A0H3C4N9_CAUCN]	cheYI	1.10163	1.10705	0.98988	1.00906	1.01866	1.01454	0.983031	0.893127	0.935859	0.965389	0.91597	0.969411	1.10066	1.11289	0.994596	1.11894
A0A0H3C4P2	2OG-Fe(II) oxygenase superfamily protein OS=Caulobacter crescentus (strain NA1000 / CB15N) GN=CCNA_00200 PE=3 SV=1 - [A0A0H3C4P2_CAUCN]	CCNA_00200	1.04497	1.05976	1.02662	0.990455	0.969792	0.972951	0.971328	0.981064	0.985049	1.00086	0.947829	0.984204	0.990076	1.01788	1.01799	0.999891
A0A0H3C4P3	Chemotaxis receiver domain protein cheYII OS=Caulobacter crescentus (strain NA1000 / CB15N) GN=CCNA_00446 PE=4 SV=1 - [A0A0H3C4P3_CAUCN]	CCNA_00446	1.10594	1.06651	1.109	0.887718	0.88101	0.847015	1.04339	1.05202	0.994384	1.02515	0.80268	0.969985	0.991792	0.997242	1.04805	0.951517
A0A0H3C4P7	NAD(P)H-quinone reductase OS=Caulobacter crescentus (strain NA1000 / CB15N) GN=CCNA_00205 PE=4 SV=1 - [A0A0H3C4P7_CAUCN]	CCNA_00205											#DIV/0!	#DIV/0!	#DIV/0!	#DIV/0!	#DIV/0!	#DIV/0!
A0A0H3C4P8	N-acetylglucosamine-6-phosphate deacetylase OS=Caulobacter crescentus (strain NA1000 / CB15N) GN=CCNA_00452 PE=3 SV=1 - [A0A0H3C4P8_CAUCN]	CCNA_00452	0.983849	1.01559	1.02127	0.953672	0.994996	0.98888	0.91812	1.02564	1.03657	1.05897	0.969327	0.978855	0.895168	0.963362	0.964396	0.998929
A0A0H3C4Q0	Flagellin OS=Caulobacter crescentus (strain NA1000 / CB15N) GN=fljN PE=3 SV=1 - [A0A0H3C4Q0_CAUCN]	fljN	1.16395	0.788991	0.627272	0.338285	0.288783	0.295918	0.66738	1.10616	2.50805	1.88162	0.290635	1.33292	0.60333	1.85557	1.14317	1.62318
A0A0H3C4Q2	TonB-dependent receptor OS=Caulobacter crescentus (strain NA1000 / CB15N) GN=CCNA_00210 PE=3 SV=1 - [A0A0H3C4Q2_CAUCN]	CCNA_00210	0.992317	1.01639	1.00662	1.08248	1.09782	1.09337	0.918452	0.962052	0.95646	0.897402	1.09086	1.06581	0.95468	0.985795	0.990034	0.995719
A0A0H3C4Q4	Phosphoenolpyruvate-protein phosphotransferase/phosphocarrier protein HPr/PTS system, glucose-specific IIA subunit OS=Caulobacter crescentus (strain NA1000 / CB15N) GN=CCNA_00457 PE=3 SV=1 - [A0A0H3C4Q4_CAUCN]	CCNA_00457	1.02092	1.02437	1.13254	0.943533	1.03927	0.92617	0.984414	0.951191	1.06577	0.981153	0.924196	1.08624	1.03493	0.901449	1.01875	0.884861
A0A0H3C4Q6	Sialic acid-specific 9-O-acetylesterase OS=Caulobacter crescentus (strain NA1000 / CB15N) GN=CCNA_00840 PE=4 SV=1 - [A0A0H3C4Q6_CAUCN]	CCNA_00840	0.936822	1.01952	0.985281	1.05716	0.987628	0.990062	1.00581	0.99556	1.00511	1.07847	1.12846	0.931982	1.01029	0.950817	1.06777	0.890466
A0A0H3C4Q7	SapC surface layer protein OS=Caulobacter crescentus (strain NA1000 / CB15N) GN=CCNA_00215 PE=4 SV=1 - [A0A0H3C4Q7_CAUCN]	CCNA_00215	1.02432	1.03164	1.035	1.0668	1.04527	1.07913	0.952837	0.864571	0.979037	0.903282	1.04147	1.08387	1.10209	0.989683	0.988568	1.00113
A0A0H3C4Q9	UDP-galactopyranose mutase OS=Caulobacter crescentus (strain NA1000 / CB15N) GN=CCNA_00465 PE=4 SV=1 - [A0A0H3C4Q9_CAUCN]	CCNA_00465	0.951173	0.956069	0.974288	1.06989	1.08421	1.08218	1.05036	1.00129	0.962952	0.954211	1.12481	1.00916	1.049	0.976275	0.988649	0.987484
A0A0H3C4R2	Uncharacterized protein OS=Caulobacter crescentus (strain NA1000 / CB15N) GN=CCNA_00221 PE=4 SV=1 - [A0A0H3C4R2_CAUCN]	CCNA_00221											#DIV/0!	#DIV/0!	#DIV/0!	#DIV/0!	#DIV/0!	#DIV/0!
A0A0H3C4R5	Cation/multidrug efflux pump acrB2 OS=Caulobacter crescentus (strain NA1000 / CB15N) GN=acrB2 PE=3 SV=1 - [A0A0H3C4R5_CAUCN]	acrB2	0.792555	0.791204	0.840665	1.00259	0.986974	1.00129	1.09551	1.1501	1.21039	1.2492	1.26501	0.968932	0.952537	0.942771	1.00129	0.941553
A0A0H3C4S3	UDP-N-acetylglucosamine 4,6-dehydratase OS=Caulobacter crescentus (strain NA1000 / CB15N) GN=CCNA_00233 PE=4 SV=1 - [A0A0H3C4S3_CAUCN]	CCNA_00233	1.06716	1.05399	1.08312	1.06664	0.988486	0.965389	0.953886	0.895708	0.945837	0.923915	0.999516	1.02373	1.06495	0.985266	1.10489	0.891736
A0A0H3C4S8	Two-component sensor histidine kinase chvG OS=Caulobacter crescentus (strain NA1000 / CB15N) GN=chvG PE=4 SV=1 - [A0A0H3C4S8_CAUCN]	chvG	0.905323	1.16273	0.905646	0.966945	0.937873	0.95744	1.01048	0.955835	1.01448	1.11198	1.06807	0.912322	1.05717	0.999644	1.00993	0.989817
A0A0H3C4T0	Pseudouridine synthase OS=Caulobacter crescentus (strain NA1000 / CB15N) GN=CCNA_00485 PE=3 SV=1 - [A0A0H3C4T0_CAUCN]	CCNA_00485	1.04175	1.20836	1.0019	0.8407	0.888452	0.87979	1.04934	0.96072	0.971934	1.17872	0.807009	0.824571	1.09224	1.03977	0.955569	1.08812
A0A0H3C4T2	Fumarylacetoacetate hydrolase family protein OS=Caulobacter crescentus (strain NA1000 / CB15N) GN=xylX PE=4 SV=1 - [A0A0H3C4T2_CAUCN]	xylX	0.670671	0.672863	0.637057	0.676876	0.694366	0.735456	0.714066	5.51144	0.662808	0.898939	1.00925	0.737322	0.129561	1.05277	0.920349	1.14388
A0A0H3C4T6	GTP cyclohydrolase 1 OS=Caulobacter crescentus (strain NA1000 / CB15N) GN=folE PE=3 SV=1 - [A0A0H3C4T6_CAUCN]	folE	0.936176	0.891488	0.859053	1.06581	0.961267	0.920388	1.18384	1.05118	1.09404	1.16048	1.13847	0.942748	1.1262	1.08978	1.158	0.941083
A0A0H3C4T7	Glutaredoxin OS=Caulobacter crescentus (strain NA1000 / CB15N) GN=CCNA_00872 PE=4 SV=1 - [A0A0H3C4T7_CAUCN]	CCNA_00872	0.864219	0.764861	0.874117	1.29886	1.25256	1.23667	0.922619	0.841665	1.05699	0.940587	1.50293	1.12376	1.09618	0.988676	1.05029	0.941339
A0A0H3C4T8	Poly(3-hydroxyalkanoate) depolymerase OS=Caulobacter crescentus (strain NA1000 / CB15N) GN=CCNA_00250 PE=4 SV=1 - [A0A0H3C4T8_CAUCN]	CCNA_00250	0.944425	0.917041	0.969889	1.05275	0.967849	1.13783	0.983688	1.01311	1.05353	0.891047	1.1147	1.18235	0.970957	0.973745	0.925231	1.05244
A0A0H3C4U1	Uncharacterized protein OS=Caulobacter crescentus (strain NA1000 / CB15N) GN=CCNA_00499 PE=4 SV=1 - [A0A0H3C4U1_CAUCN]	CCNA_00499	0.979843	0.918564	0.885365	1.0943	1.07754	1.10956	1.00471	1.07017	1.00621	0.97321	1.11681	1.03391	0.938833	1.10671	0.986248	1.12214
A0A0H3C4U2	Uncharacterized protein OS=Caulobacter crescentus (strain NA1000 / CB15N) GN=CCNA_00877 PE=4 SV=1 - [A0A0H3C4U2_CAUCN]	CCNA_00877	1.02069	1.22831	1.06946	0.946173	0.952586	0.883085	1.01523	0.93108	0.979051	0.986593	0.926998	0.992355	1.09037	0.954396	1.07144	0.89076
A0A0H3C4U3	Esterase OS=Caulobacter crescentus (strain NA1000 / CB15N) GN=CCNA_00255 PE=4 SV=1 - [A0A0H3C4U3_CAUCN]	CCNA_00255	1.02612	1.02047	1.06518	0.965607	1.01805	0.999814	0.959715	1.02228	0.924737	1.07789	0.941027	0.857911	0.938799	0.963332	0.965786	0.997458
A0A0H3C4U6	tRNA (cytidine(34)-2'-O)-methyltransferase OS=Caulobacter crescentus (strain NA1000 / CB15N) GN=trmL PE=3 SV=1 - [A0A0H3C4U6_CAUCN]	trmL	1.04399	1.12383	1.01477	1.0067	1.01896	1.00796	0.849935	0.820551	1.02121	0.938843	0.964281	1.08773	1.03581	1.0288	0.998758	1.03008
A0A0H3C4U9	Ribonucleoside-diphosphate reductase subunit beta OS=Caulobacter crescentus (strain NA1000 / CB15N) GN=CCNA_00261 PE=3 SV=1 - [A0A0H3C4U9_CAUCN]	CCNA_00261	0.905908	0.889196	0.915873	1.30109	1.27302	1.31463	0.950589	0.836547	0.880487	0.819915	1.43623	1.07388	1.13632	0.98912	0.989705	0.999409
A0A0H3C4V1	Phosphoglycerate mutase family OS=Caulobacter crescentus (strain NA1000 / CB15N) GN=CCNA_00509 PE=4 SV=1 - [A0A0H3C4V1_CAUCN]	CCNA_00509	0.992168	0.999916	0.9597	1.1117	1.07111	1.07545	0.873979	0.975561	0.925491	1.05115	1.12047	0.880452	0.895873	1.03383	1.0337	1.00013
A0A0H3C4V2	MCP-signal associated domain protein OS=Caulobacter crescentus (strain NA1000 / CB15N) GN=CCNA_00888 PE=4 SV=1 - [A0A0H3C4V2_CAUCN]	CCNA_00888	1.04955	1.10368	1.12447	1.03396	1.12995	1.06875	0.884352	0.867605	0.888144	0.861697	0.985139	1.03069	1.0193	0.933374	0.967442	0.964785
A0A0H3C4V6	5-methyltetrahydropteroyltriglutamate--homocysteine methyltransferase OS=Caulobacter crescentus (strain NA1000 / CB15N) GN=metE PE=3 SV=1 - [A0A0H3C4V6_CAUCN]	metE	1.15149	1.10198	1.14844	1.09096	1.06658	1.05689	0.953091	0.946371	0.78072	0.748385	0.947434	1.04321	1.0071	1.00266	1.03224	0.971347
A0A0H3C4V7	Helix-turn-helix DNA-binding protein OS=Caulobacter crescentus (strain NA1000 / CB15N) GN=CCNA_00893 PE=4 SV=1 - [A0A0H3C4V7_CAUCN]	CCNA_00893	1.02099	1.03905	0.980746	0.995384	0.973155	0.917557	1.03013	1.0041	0.975872	1.00774	0.974917	0.968373	1.02593	1.04104	1.08482	0.959641
A0A0H3C4W1	Laccase domain protein OS=Caulobacter crescentus (strain NA1000 / CB15N) GN=CCNA_00523 PE=3 SV=1 - [A0A0H3C4W1_CAUCN]	CCNA_00523	0.939546	0.989579	1.14818	0.978242	0.961558	1.05176	1.00721	1.02267	1.05015	1.00226	1.04119	1.04778	0.984881	0.818289	0.930098	0.879788
A0A0H3C4W2	Ribosomal large subunit pseudouridine synthase F OS=Caulobacter crescentus (strain NA1000 / CB15N) GN=CCNA_00898 PE=3 SV=1 - [A0A0H3C4W2_CAUCN]	CCNA_00898	1.02102	1.02465	0.994286	0.985298	0.967119	0.983295	1.0366	1.03732	0.951752	1.01389	0.965009	0.938712	0.999306	1.02689	1.00204	1.0248
A0A0H3C4W5	Uncharacterized protein OS=Caulobacter crescentus (strain NA1000 / CB15N) GN=CCNA_00529 PE=4 SV=1 - [A0A0H3C4W5_CAUCN]	CCNA_00529	0.899114	0.927583	0.890002	1.00608	0.908496	0.966077	0.983223	0.877706	1.35369	1.16238	1.11896	1.16459	1.12022	1.01024	1.0414	0.970073
A0A0H3C4W6	Inositol transport ATP-binding protein IatA OS=Caulobacter crescentus (strain NA1000 / CB15N) GN=iatA PE=4 SV=1 - [A0A0H3C4W6_CAUCN]	iatA	1.15038	1.07123	1.24578	0.884365	0.904652	0.943641	1.14076	1.08589	0.862547	0.827621	0.768758	1.0422	1.05052	0.923419	0.937184	0.985313
A0A0H3C4W8	DNA-directed RNA polymerase subunit beta' OS=Caulobacter crescentus (strain NA1000 / CB15N) GN=rpoC PE=3 SV=1 - [A0A0H3C4W8_CAUCN]	rpoC	1.02058	0.978149	1.02251	0.970232	0.962555	0.964423	1.06471	1.09065	0.972148	1.04655	0.95067	0.928906	0.976219	0.998105	1.00602	0.992129
A0A0H3C4X3	Methyl-accepting chemotaxis protein OS=Caulobacter crescentus (strain NA1000 / CB15N) GN=CCNA_00543 PE=4 SV=1 - [A0A0H3C4X3_CAUCN]	CCNA_00543	1.21722	1.07836	1.09283	0.960936	0.909978	0.904029	0.955954	0.951324	0.968132	0.985953	0.789454	0.981925	1.00487	1.11382	1.06295	1.04786
A0A0H3C4X9	Release factor glutamine methyltransferase OS=Caulobacter crescentus (strain NA1000 / CB15N) GN=prmC PE=3 SV=1 - [A0A0H3C4X9_CAUCN]	prmC	1.01344	1.01723	0.98038	0.965919	0.959679	0.923882	1.03803	1.11139	1.00429	1.06243	0.953107	0.945281	0.933989	1.03372	1.0455	0.988736
A0A0H3C4Y5	2,3,4,5-tetrahydropyridine-2,6-dicarboxylate N-succinyltransferase OS=Caulobacter crescentus (strain NA1000 / CB15N) GN=dapD PE=3 SV=1 - [A0A0H3C4Y5_CAUCN]	dapD	0.95248	0.948593	0.940107	1.07438	1.05164	1.05109	1.02728	1.03762	0.959627	1.0251	1.12798	0.93613	0.990027	1.01316	1.02216	0.991198
A0A0H3C4Y8	GntR family transcriptional regulator OS=Caulobacter crescentus (strain NA1000 / CB15N) GN=CCNA_00928 PE=4 SV=1 - [A0A0H3C4Y8_CAUCN]	CCNA_00928	1.15517	0.818349	1.01619	0.805924	1.03154	0.89268	1.49658	0.999513	0.940502	1.03256	0.69767	0.910848	1.49731	1.13676	0.902814	1.25913
A0A0H3C4Z2	M28 Zn-Peptidase OS=Caulobacter crescentus (strain NA1000 / CB15N) GN=CCNA_00933 PE=4 SV=1 - [A0A0H3C4Z2_CAUCN]	CCNA_00933	1.05416	1.06573	1.00314	1.07719	1.07997	1.07809	0.908662	0.887355	0.921324	0.939677	1.02185	0.980469	1.02401	1.05086	0.999172	1.05173
A0A0H3C4Z4	Phosphate regulon response regulator PhoB OS=Caulobacter crescentus (strain NA1000 / CB15N) GN=phoB PE=4 SV=1 - [A0A0H3C4Z4_CAUCN]	phoB	1.0486	1.13793	1.08134	0.982487	0.958593	0.962766	0.969902	0.928438	0.963802	0.961383	0.936953	1.00252	1.04466	0.969717	1.02048	0.950252
A0A0H3C4Z7	Acetyl-CoA acetyltransferase OS=Caulobacter crescentus (strain NA1000 / CB15N) GN=CCNA_00938 PE=3 SV=1 - [A0A0H3C4Z7_CAUCN]	CCNA_00938	0.992589	0.956942	0.982679	1.05441	1.07131	1.09291	0.998489	0.965622	0.944756	0.994469	1.06228	0.95001	1.03404	1.01008	0.964764	1.04698
A0A0H3C4Z8	Hydroxyacylglutathione hydrolase OS=Caulobacter crescentus (strain NA1000 / CB15N) GN=gloB PE=3 SV=1 - [A0A0H3C4Z8_CAUCN]	gloB	0.820779	1.05319	0.96891	0.901665	0.955236	0.977677	0.884791	1.7989	0.859931	0.861507	1.09855	0.998171	0.49185	0.847115	0.922252	0.91853
A0A0H3C4Z9	Phosphotransferase family protein OS=Caulobacter crescentus (strain NA1000 / CB15N) GN=CCNA_00301 PE=4 SV=1 - [A0A0H3C4Z9_CAUCN]	CCNA_00301	0.980274	1.10162	0.917594	0.940855	0.913064	0.932692	0.939421	1.23517	1.05116	1.10008	0.959788	0.955524	0.760562	1.06831	1.00875	1.05904
A0A0H3C502	Methyltransferase OS=Caulobacter crescentus (strain NA1000 / CB15N) GN=CCNA_00558 PE=4 SV=1 - [A0A0H3C502_CAUCN]	CCNA_00558	1.05839	0.952159	1.14739	0.950247	0.962199	1.08543	1.12098	0.87329	0.974682	0.865689	0.897824	1.1259	1.28363	0.922429	0.875456	1.05366
A0A0H3C504	Phospholipid-lipopolysaccharide ABC transporter OS=Caulobacter crescentus (strain NA1000 / CB15N) GN=CCNA_00307 PE=4 SV=1 - [A0A0H3C504_CAUCN]	CCNA_00307	0.917254	0.949146	1.03386	0.962992	0.933068	0.959996	0.968196	1.11943	1.06502	1.17594	1.04986	0.905679	0.864901	0.887209	1.00312	0.884449
A0A0H3C507	CtrA inhibitory protein SciP OS=Caulobacter crescentus (strain NA1000 / CB15N) GN=sciP PE=4 SV=1 - [A0A0H3C507_CAUCN]	sciP	1.1878	0.823768	0.768879	1.09453	0.970442	0.927219	1.06458	0.926657	1.17051	0.952639	0.921474	1.2287	1.14884	1.54485	1.18044	1.3087
A0A0H3C508	Putative membrane spanning protein OS=Caulobacter crescentus (strain NA1000 / CB15N) GN=CCNA_00312 PE=4 SV=1 - [A0A0H3C508_CAUCN]	CCNA_00312	0.952895	0.981469	1.03182	1.06463	1.02188	1.12423	0.96789	0.998887	0.94474	0.993036	1.11725	0.951366	0.968969	0.923505	0.946985	0.975206
A0A0H3C509	Sensory transduction protein kinase CenK OS=Caulobacter crescentus (strain NA1000 / CB15N) GN=cenK PE=4 SV=1 - [A0A0H3C509_CAUCN]	cenK	1.0016	1.08257	1.02156	1.06814	0.988496	1.02557	0.971743	0.9754	0.933984	1.02232	1.06643	0.913594	0.996251	0.980467	1.0415	0.941396
A0A0H3C512	Acetyltransferase, GNAT family OS=Caulobacter crescentus (strain NA1000 / CB15N) GN=CCNA_00319 PE=4 SV=1 - [A0A0H3C512_CAUCN]	CCNA_00319											#DIV/0!	#DIV/0!	#DIV/0!	#DIV/0!	#DIV/0!	#DIV/0!
A0A0H3C514	Flagellar motor switch protein FliN OS=Caulobacter crescentus (strain NA1000 / CB15N) GN=fliN PE=3 SV=1 - [A0A0H3C514_CAUCN]	fliN	1.13236	1.17473	1.01346	0.985324	0.923892	0.92468	0.874861	0.851589	1.03626	0.909421	0.870148	1.13947	1.02733	1.11732	1.06558	1.04855
A0A0H3C517	Vegetatible incompatibility protein HET-E-1 OS=Caulobacter crescentus (strain NA1000 / CB15N) GN=CCNA_00326 PE=4 SV=1 - [A0A0H3C517_CAUCN]	CCNA_00326	0.97643	0.942141	0.963881	1.05502	1.03498	1.01283	1.00869	0.990514	0.949513	1.03291	1.08049	0.919262	1.01835	1.01302	1.04165	0.972511
A0A0H3C519	TetR-family transcriptional regulator OS=Caulobacter crescentus (strain NA1000 / CB15N) GN=CCNA_00959 PE=4 SV=1 - [A0A0H3C519_CAUCN]	CCNA_00959	0.933294	0.891263	1.11795	1.20431	1.18147	1.16312	0.928781	0.904497	0.950803	0.79367	1.29039	1.19798	1.02685	0.834823	1.03541	0.806271
A0A0H3C520	Putative pyruvate, phosphate dikinase regulatory protein OS=Caulobacter crescentus (strain NA1000 / CB15N) GN=CCNA_00001 PE=3 SV=1 - [A0A0H3C520_CAUCN]	CCNA_00001	1.02511	1.00292	0.982511	0.933012	0.91422	0.908616	1.02734	0.929722	1.05567	1.068	0.910161	0.988454	1.105	1.04335	1.02685	1.01607
A0A0H3C524	TetR-family transcriptional regulator OS=Caulobacter crescentus (strain NA1000 / CB15N) GN=CCNA_00337 PE=4 SV=1 - [A0A0H3C524_CAUCN]	CCNA_00337	0.987961	1.08986	1.05474	1.04319	1.04351	0.899519	1.00245	0.97316	1.01994	0.958583	1.05591	1.06401	1.03009	0.936691	1.15972	0.807684
A0A0H3C527	Chaperone protein DnaK OS=Caulobacter crescentus (strain NA1000 / CB15N) GN=dnaK PE=2 SV=1 - [A0A0H3C527_CAUCN]	dnaK	0.904545	0.895785	0.911597	0.967939	0.934321	0.940051	1.00572	0.943726	1.33998	1.15167	1.07008	1.16351	1.0657	0.992264	1.02967	0.963675
A0A0H3C529	Dihydrolipoyllysine-residue succinyltransferase component of 2-oxoglutarate dehydrogenase complex OS=Caulobacter crescentus (strain NA1000 / CB15N) GN=odhB PE=3 SV=1 - [A0A0H3C529_CAUCN]	odhB	0.948769	0.912348	0.935381	1.04755	1.04162	1.05526	0.959913	0.997702	1.04428	1.14025	1.10412	0.915837	0.962124	1.01431	0.992693	1.02178
A0A0H3C530	Hydroxyacylglutathione hydrolase OS=Caulobacter crescentus (strain NA1000 / CB15N) GN=CCNA_00971 PE=4 SV=1 - [A0A0H3C530_CAUCN]	CCNA_00971	1.01862	1.00953	1.02959	1.02378	1.02358	0.921642	0.955303	0.944967	1.01897	0.952709	1.00507	1.06955	1.01094	0.989343	1.11083	0.890637
A0A0H3C533	Molybdopterin synthase sulfur carrier subunit OS=Caulobacter crescentus (strain NA1000 / CB15N) GN=moaD PE=3 SV=1 - [A0A0H3C533_CAUCN]	moaD	0.903983	1.00637	0.974161	0.932639	1.06346	1.06279	0.967406	1.0435	1.05236	1.09138	1.0317	0.964242	0.92708	0.92796	0.877538	1.05746
A0A0H3C535	Methyl-accepting chemotaxis protein OS=Caulobacter crescentus (strain NA1000 / CB15N) GN=CCNA_00348 PE=4 SV=1 - [A0A0H3C535_CAUCN]	CCNA_00348	1.04725	0.962746	0.879256	1.19428	1.09962	1.07465	1.00618	0.912279	0.959056	0.931912	1.1404	1.02913	1.10293	1.19106	1.11133	1.07175
A0A0H3C541	Delta 3,5-delta2,4-dienoyl-CoA isomerase OS=Caulobacter crescentus (strain NA1000 / CB15N) GN=CCNA_00358 PE=4 SV=1 - [A0A0H3C541_CAUCN]	CCNA_00358	1.07563	1.00666	0.979923	1.10469	0.922988	1.0912	0.895521	0.791101	1.01848	0.852766	1.02701	1.19433	1.13199	1.09767	1.01236	1.08427
A0A0H3C542	TonB-dependent receptor OS=Caulobacter crescentus (strain NA1000 / CB15N) GN=CCNA_00597 PE=3 SV=1 - [A0A0H3C542_CAUCN]	CCNA_00597	0.840238	1.84266	0.88407	0.965132	0.824246	0.823671	0.771592	0.992046	0.882322	1.13666	1.14864	0.776241	0.777778	0.95042	1.17174	0.811116
A0A0H3C548	Acid phosphatase OS=Caulobacter crescentus (strain NA1000 / CB15N) GN=CCNA_00363 PE=3 SV=1 - [A0A0H3C548_CAUCN]	CCNA_00363	1.04183	1.12867	1.13751	1.0619	0.93883	0.995766	0.821593	0.857832	0.964428	0.985849	1.01926	0.978271	0.957754	0.915889	1.06641	0.85885
A0A0H3C549	PurR-family transcriptional regulator OS=Caulobacter crescentus (strain NA1000 / CB15N) GN=CCNA_00609 PE=4 SV=1 - [A0A0H3C549_CAUCN]	CCNA_00609	0.920043	1.15907	0.954693	1.19185	1.01287	1.00389	1.01956	0.971065	0.957259	0.845249	1.29543	1.13252	1.04994	0.963705	1.18723	0.811726
A0A0H3C553	Phosphonates transport system permease protein phnE OS=Caulobacter crescentus (strain NA1000 / CB15N) GN=CCNA_00368 PE=3 SV=1 - [A0A0H3C553_CAUCN]	CCNA_00368	0.938043	0.937209	1.01065	1.26082	1.08298	1.53642	0.777147	0.982435	0.755565	0.819086	1.3441	0.922448	0.791041	0.928157	0.820625	1.13104
A0A0H3C556	Phosphate starvation-inducible protein PhoH OS=Caulobacter crescentus (strain NA1000 / CB15N) GN=phoH PE=4 SV=1 - [A0A0H3C556_CAUCN]	phoH	0.9233	0.858331	0.982173	0.903369	0.982072	0.9611	1.06502	1.06469	1.1701	1.19334	0.978413	0.980527	1.00032	0.940059	0.939932	1.00013
A0A0H3C558	Uncharacterized protein OS=Caulobacter crescentus (strain NA1000 / CB15N) GN=CCNA_00058 PE=4 SV=1 - [A0A0H3C558_CAUCN]	CCNA_00058	1.10798	1.09896	1.02765	0.990406	0.890229	0.945255	0.935348	1.09238	1.00315	0.922639	0.893883	1.08726	0.85625	1.07817	1.04777	1.02902
A0A0H3C562	Thiol:disulfide interchange protein dsbA OS=Caulobacter crescentus (strain NA1000 / CB15N) GN=CCNA_00379 PE=4 SV=1 - [A0A0H3C562_CAUCN]	CCNA_00379	0.993948	0.971999	0.990983	0.982432	0.969544	1.00177	1.02157	1.04498	1.04831	1.11242	0.988414	0.942375	0.977594	1.00299	0.980696	1.02273
A0A0H3C563	tRNA N6-adenosine threonylcarbamoyltransferase OS=Caulobacter crescentus (strain NA1000 / CB15N) GN=tsaD PE=3 SV=1 - [A0A0H3C563_CAUCN]	tsaD	0.919677	0.951606	0.946895	1.00265	0.979767	0.985133	0.917251	1.08884	1.12323	1.04744	1.09022	1.07236	0.842409	0.971256	1.01779	0.954283
A0A0H3C565	3-ketoacyl-CoA thiolase OS=Caulobacter crescentus (strain NA1000 / CB15N) GN=CCNA_00075 PE=3 SV=1 - [A0A0H3C565_CAUCN]	CCNA_00075	0.999763	1.00299	0.998853	0.937917	0.903029	0.91123	1.0695	1.1723	1.00009	1.11374	0.938139	0.897955	0.912315	1.00091	1.02929	0.972431
A0A0H3C566	DNA-3-methyladenine glycosylase OS=Caulobacter crescentus (strain NA1000 / CB15N) GN=CCNA_00386 PE=4 SV=1 - [A0A0H3C566_CAUCN]	CCNA_00386	0.850953	0.81805	0.92604	1.06225	1.11011	1.10036	0.985634	1.01033	1.07472	1.16132	1.24831	0.925429	0.975557	0.918915	0.965365	0.951883
A0A0H3C567	LexA-related transcriptional repressor OS=Caulobacter crescentus (strain NA1000 / CB15N) GN=CCNA_00080 PE=4 SV=1 - [A0A0H3C567_CAUCN]	CCNA_00080	1.08	1.05962	1.05668	0.920706	0.965621	0.860836	1.09896	1.02253	0.973878	1.02748	0.852507	0.947833	1.07475	1.02206	1.06955	0.955601
A0A0H3C569	ROS/MUCR transcriptional regulator OS=Caulobacter crescentus (strain NA1000 / CB15N) GN=CCNA_00982 PE=4 SV=1 - [A0A0H3C569_CAUCN]	CCNA_00982	1.06484	1.09573	1.07993	0.826311	0.749683	0.756138	1.17391	1.20043	1.05882	1.1002	0.775994	0.962385	0.977913	0.986033	1.0928	0.902297
A0A0H3C571	NAD-specific glutamate dehydrogenase GdhZ OS=Caulobacter crescentus (strain NA1000 / CB15N) GN=gdhZ PE=4 SV=1 - [A0A0H3C571_CAUCN]	gdhZ	1.12628	1.08381	1.11972	0.9652	0.953246	0.933393	0.913817	0.943389	0.963342	0.931233	0.856983	1.03448	0.968654	1.00585	1.03408	0.972704
A0A0H3C573	Uncharacterized protein OS=Caulobacter crescentus (strain NA1000 / CB15N) GN=CCNA_00391 PE=4 SV=1 - [A0A0H3C573_CAUCN]	CCNA_00391	0.922384	0.999033	0.983058	1.11897	1.0559	1.25882	0.949865	1.02406	0.932473	0.862924	1.21312	1.0806	0.92755	0.93828	0.888897	1.05556
A0A0H3C574	Stress response protein CsbD OS=Caulobacter crescentus (strain NA1000 / CB15N) GN=CCNA_00987 PE=3 SV=1 - [A0A0H3C574_CAUCN]	CCNA_00987	0.711736	0.822505	0.842366	1.39319	1.22917	1.24562	1.17273	0.852085	0.956624	0.928459	1.95745	1.03033	1.3763	0.844925	1.11847	0.755429
A0A0H3C578	L-asparaginase OS=Caulobacter crescentus (strain NA1000 / CB15N) GN=CCNA_00096 PE=4 SV=1 - [A0A0H3C578_CAUCN]	CCNA_00096	0.93613	1.00952	1.04593	0.930819	1.06959	1.04699	0.988473	0.99343	0.999618	0.976626	0.994326	1.02354	0.99501	0.895021	0.889043	1.00672
A0A0H3C582	16S rRNA m5C methyltransferase RsmB OS=Caulobacter crescentus (strain NA1000 / CB15N) GN=rsmB PE=3 SV=1 - [A0A0H3C582_CAUCN]	rsmB	1.01892	1.01539	1.01583	1.03549	0.966088	1.00548	0.936823	0.987658	1.01097	1.03108	1.01627	0.980493	0.94853	1.00304	1.02985	0.97397
A0A0H3C583	Heme:hemopexin-binding protein OS=Caulobacter crescentus (strain NA1000 / CB15N) GN=CCNA_00639 PE=4 SV=1 - [A0A0H3C583_CAUCN]	CCNA_00639	1.00417	1.08229	1.06512	0.991166	0.920989	0.980033	1.02578	1.08208	0.965397	0.912053	0.987046	1.05849	0.947966	0.942779	1.01136	0.932189
A0A0H3C584	Uncharacterized protein OS=Caulobacter crescentus (strain NA1000 / CB15N) GN=CCNA_00997 PE=4 SV=1 - [A0A0H3C584_CAUCN]	CCNA_00997	1.12391	1.08162	1.01802	0.952037	0.961673	0.90845	1.01759	1.05737	0.989358	0.988553	0.847078	1.00081	0.962378	1.10401	1.04798	1.05346
A0A0H3C585	Enoyl-CoA hydratase OS=Caulobacter crescentus (strain NA1000 / CB15N) GN=CCNA_00401 PE=4 SV=1 - [A0A0H3C585_CAUCN]	CCNA_00401	0.776317	1.08521	0.823746	1.13732	1.02055	0.986879	1.09104	0.978679	1.00322	1.01491	1.46502	0.988485	1.1148	0.942423	1.15244	0.817765
A0A0H3C586	Lon endopeptidase-related protein OS=Caulobacter crescentus (strain NA1000 / CB15N) GN=CCNA_00108 PE=4 SV=1 - [A0A0H3C586_CAUCN]	CCNA_00108	0.863419	0.841375	0.912144	1.0446	1.23119	1.17327	0.943059	1.01698	1.11346	1.0331	1.20984	1.07778	0.927317	0.946582	0.890331	1.06318
A0A0H3C588	Flagellar biosynthetic protein FliP OS=Caulobacter crescentus (strain NA1000 / CB15N) GN=fliP PE=3 SV=1 - [A0A0H3C588_CAUCN]	fliP	1.11719	1.04234	1.06733	0.841529	0.86448	0.831808	1.14396	1.0432	1.00002	1.11106	0.753257	0.900055	1.09659	1.04671	1.01169	1.03462
A0A0H3C592	Uncharacterized protein OS=Caulobacter crescentus (strain NA1000 / CB15N) GN=CCNA_00119 PE=4 SV=1 - [A0A0H3C592_CAUCN]	CCNA_00119	1.02766	1.09863	1.04231	1.12576	0.964544	0.938855	0.869976	0.995345	0.995309	0.913483	1.09546	1.08958	0.874045	0.985946	1.19908	0.822251
A0A0H3C596	Uncharacterized protein OS=Caulobacter crescentus (strain NA1000 / CB15N) GN=CCNA_00411 PE=4 SV=1 - [A0A0H3C596_CAUCN]	CCNA_00411	0.935383	1.12021	0.985701	0.937153	0.933327	0.937452	0.896658	1.15478	1.04653	1.09888	1.00189	0.952361	0.776478	0.948952	0.999681	0.949255
A0A0H3C597	Uncharacterized protein OS=Caulobacter crescentus (strain NA1000 / CB15N) GN=CCNA_00124 PE=4 SV=1 - [A0A0H3C597_CAUCN]	CCNA_00124	0.974454	0.992626	0.977274	1.0179	1.01421	0.994887	0.914587	0.933167	1.07064	1.11316	1.04459	0.961806	0.980089	0.997114	1.02313	0.974568
A0A0H3C598	Multicopper oxidase PcoA OS=Caulobacter crescentus (strain NA1000 / CB15N) GN=CCNA_01015 PE=4 SV=1 - [A0A0H3C598_CAUCN]	CCNA_01015	0.835879	0.816196	0.819239	1.10783	1.10375	1.16904	0.842937	0.863607	1.27526	1.05405	1.32535	1.20987	0.976066	1.02031	0.947642	1.07668
A0A0H3C5A0	Rrf2 family protein OS=Caulobacter crescentus (strain NA1000 / CB15N) GN=CCNA_00131 PE=4 SV=1 - [A0A0H3C5A0_CAUCN]	CCNA_00131	0.819421	0.80925	0.888512	1.05375	1.06311	1.16293	1.00126	0.984825	1.3084	1.03672	1.28597	1.26205	1.01669	0.922239	0.906111	1.0178
A0A0H3C5A3	Hybrid two-component histidine kinase/receiver protein ShkA OS=Caulobacter crescentus (strain NA1000 / CB15N) GN=shkA PE=4 SV=1 - [A0A0H3C5A3_CAUCN]	shkA	1.00595	0.888846	1.00317	0.997775	1.05973	0.950302	1.06446	0.976564	1.05125	1.06992	0.991873	0.982548	1.09	1.00277	1.04996	0.955061
A0A0H3C5A4	LacI-family transcriptional regulator OS=Caulobacter crescentus (strain NA1000 / CB15N) GN=CCNA_01020 PE=4 SV=1 - [A0A0H3C5A4_CAUCN]	CCNA_01020	1.01403	0.957089	0.984364	0.97383	0.962744	0.967411	1.60439	0.980801	0.867542	0.91223	0.960358	0.951012	1.6358	1.03014	1.00664	1.02334
A0A0H3C5A5	Type I restriction-modification system restriction subunit OS=Caulobacter crescentus (strain NA1000 / CB15N) GN=CCNA_00659 PE=4 SV=1 - [A0A0H3C5A5_CAUCN]	CCNA_00659	0.983359	0.969277	0.872823	1.19913	1.20012	1.24707	0.777291	0.729331	1.12491	0.813451	1.21942	1.38289	1.06576	1.12664	0.961561	1.17168
A0A0H3C5A7	Ribosomal RNA small subunit methyltransferase I OS=Caulobacter crescentus (strain NA1000 / CB15N) GN=rsmI PE=3 SV=1 - [A0A0H3C5A7_CAUCN]	rsmI	0.961958	0.975698	0.95151	0.994528	1.06119	1.02016	1.04289	1.09726	0.954868	0.98457	1.03386	0.969833	0.950448	1.01098	0.974872	1.03704
A0A0H3C5A8	Uncharacterized protein OS=Caulobacter crescentus (strain NA1000 / CB15N) GN=CCNA_01025 PE=4 SV=1 - [A0A0H3C5A8_CAUCN]	CCNA_01025	1.04127	1.10395	0.998115	1.04137	0.910074	0.926477	1.0671	0.970212	0.979576	0.993178	1.00009	0.986305	1.09986	1.04324	1.12401	0.928142
A0A0H3C5B2	Glyoxalase family protein OS=Caulobacter crescentus (strain NA1000 / CB15N) GN=CCNA_00157 PE=4 SV=1 - [A0A0H3C5B2_CAUCN]	CCNA_00157	0.985024	0.922409	0.960454	1.22967	1.14859	1.22596	0.839639	0.846104	1.03901	0.802911	1.24837	1.29405	0.99236	1.02558	1.00303	1.02248
A0A0H3C5B3	Peptidyl-prolyl cis-trans isomerase OS=Caulobacter crescentus (strain NA1000 / CB15N) GN=CCNA_01030 PE=4 SV=1 - [A0A0H3C5B3_CAUCN]	CCNA_01030	0.988571	0.991388	1.00079	1.02852	1.02751	1.08468	1.00505	1.07752	0.905936	1.00116	1.04041	0.904882	0.932745	0.987789	0.948231	1.04172
A0A0H3C5B4	ABC-type polysaccharide/polyol phosphate transport system, ATPase component OS=Caulobacter crescentus (strain NA1000 / CB15N) GN=CCNA_00670 PE=4 SV=1 - [A0A0H3C5B4_CAUCN]	CCNA_00670	0.981322	1.00505	1.0474	0.973258	1.06179	1.01592	1.0203	0.990597	1.00239	1.00406	0.991783	0.998329	1.02998	0.936908	0.958005	0.977979
A0A0H3C5B6	O-antigen polymerase OS=Caulobacter crescentus (strain NA1000 / CB15N) GN=CCNA_00164 PE=4 SV=1 - [A0A0H3C5B6_CAUCN]	CCNA_00164	0.871269	0.950679	0.952027	0.944727	1.04076	0.977928	1.19067	1.13806	1.07261	1.06532	1.08431	1.00685	1.04623	0.915172	0.96605	0.947334
A0A0H3C5B7	Gamma-glutamyltranspeptidase OS=Caulobacter crescentus (strain NA1000 / CB15N) GN=CCNA_01035 PE=4 SV=1 - [A0A0H3C5B7_CAUCN]	CCNA_01035	1.12535	1.15791	1.07876	0.829989	0.9021	0.854135	1.08571	1.09946	0.899777	1.02282	0.737538	0.8797	0.987493	1.04319	0.971731	1.07354
A0A0H3C5C5	Conserved hypothetical cytosolic protein OS=Caulobacter crescentus (strain NA1000 / CB15N) GN=CCNA_01045 PE=4 SV=1 - [A0A0H3C5C5_CAUCN]	CCNA_01045											#DIV/0!	#DIV/0!	#DIV/0!	#DIV/0!	#DIV/0!	#DIV/0!
A0A0H3C5C8	ABC transporter ATP-binding protein OS=Caulobacter crescentus (strain NA1000 / CB15N) GN=CCNA_01050 PE=4 SV=1 - [A0A0H3C5C8_CAUCN]	CCNA_01050	0.990164	0.994777	0.952909	0.963273	0.958258	0.956901	1.04346	1.05538	1.03006	1.05505	0.972842	0.976307	0.988701	1.0391	1.00666	1.03222
A0A0H3C5C9	Zinc-finger domain protein OS=Caulobacter crescentus (strain NA1000 / CB15N) GN=CCNA_00189 PE=4 SV=1 - [A0A0H3C5C9_CAUCN]	CCNA_00189	0.967118	0.993085	1.01558	1.06999	1.00977	1.06625	1.05454	0.892398	1.0571	0.925644	1.10637	1.14202	1.18169	0.952278	1.00351	0.948947
A0A0H3C5D1	GT1 family glyscosyl transferase OS=Caulobacter crescentus (strain NA1000 / CB15N) GN=CCNA_01055 PE=4 SV=1 - [A0A0H3C5D1_CAUCN]	CCNA_01055	0.995568	0.997078	1.03697	1.00626	1.01285	1.02783	0.9766	0.951639	1.02104	0.996963	1.01074	1.02415	1.02623	0.960073	0.97901	0.980657
A0A0H3C5D2	Antibiotic biosynthesis monooxygenase family protein OS=Caulobacter crescentus (strain NA1000 / CB15N) GN=CCNA_00194 PE=4 SV=1 - [A0A0H3C5D2_CAUCN]	CCNA_00194											#DIV/0!	#DIV/0!	#DIV/0!	#DIV/0!	#DIV/0!	#DIV/0!
A0A0H3C5D3	Uncharacterized protein OS=Caulobacter crescentus (strain NA1000 / CB15N) GN=CCNA_00698 PE=4 SV=1 - [A0A0H3C5D3_CAUCN]	CCNA_00698	0.900872	0.942744	0.879055	1.16419	1.07507	1.00601	1.00031	0.887275	1.0821	1.04865	1.2923	1.0319	1.12739	1.02482	1.15723	0.885576
A0A0H3C5D4	Outer membrane protein OS=Caulobacter crescentus (strain NA1000 / CB15N) GN=CCNA_00201 PE=3 SV=1 - [A0A0H3C5D4_CAUCN]	CCNA_00201	0.959827	0.978084	0.973178	0.969602	0.976914	0.964999	1.16003	1.03447	0.976617	1.01497	1.01018	0.962213	1.12137	0.986281	1.00477	0.981599
A0A0H3C5D6	SDR pteridine reductase OS=Caulobacter crescentus (strain NA1000 / CB15N) GN=CCNA_00422 PE=4 SV=1 - [A0A0H3C5D6_CAUCN]	CCNA_00422	0.948277	1.05165	0.99401	0.974503	1.04861	1.0386	0.976356	0.997082	1.08549	1.04005	1.02766	1.04369	0.979213	0.953992	0.938288	1.01674
A0A0H3C5D7	Succinyl-CoA:3-ketoacid-coenzyme A transferase subunit A OS=Caulobacter crescentus (strain NA1000 / CB15N) GN=CCNA_00206 PE=4 SV=1 - [A0A0H3C5D7_CAUCN]	CCNA_00206	1.10207	1.07049	1.15717	0.971796	1.01228	0.981064	0.786009	0.937937	0.980249	0.951432	0.88179	1.03029	0.838019	0.952389	0.990553	0.961472
A0A0H3C5D9	Uncharacterized protein OS=Caulobacter crescentus (strain NA1000 / CB15N) GN=CCNA_00711 PE=4 SV=1 - [A0A0H3C5D9_CAUCN]	CCNA_00711	1.0056	0.963381	1.01872	0.825156	0.830107	0.767633	1.38269	1.24264	1.10717	1.05624	0.820563	1.04822	1.1127	0.987115	1.07494	0.918302
A0A0H3C5E1	Porphyromonas-type peptidyl-arginine deiminase OS=Caulobacter crescentus (strain NA1000 / CB15N) GN=CCNA_00211 PE=4 SV=1 - [A0A0H3C5E1_CAUCN]	CCNA_00211	0.960357	0.950145	0.955818	0.999064	0.979731	0.965018	1.00636	0.985706	1.15375	1.10095	1.0403	1.04796	1.02096	1.00475	1.03528	0.97051
A0A0H3C5E6	Hot dog superfamily protein OS=Caulobacter crescentus (strain NA1000 / CB15N) GN=CCNA_00216 PE=4 SV=1 - [A0A0H3C5E6_CAUCN]	CCNA_00216	0.940516	0.949362	0.878698	1.23109	1.23264	1.28075	0.884783	0.871012	0.927332	0.75019	1.30895	1.23613	1.01581	1.07035	0.961225	1.11353
A0A0H3C5E8	Acyl-CoA dehydrogenase OS=Caulobacter crescentus (strain NA1000 / CB15N) GN=CCNA_00726 PE=3 SV=1 - [A0A0H3C5E8_CAUCN]	CCNA_00726	0.927025	0.891418	0.923101	1.0327	1.01199	1.04091	0.886348	0.902053	1.21744	1.15919	1.11399	1.05025	0.982591	1.00425	0.992108	1.01224
A0A0H3C5E9	Chemotaxis histidine kinase protein cheAI OS=Caulobacter crescentus (strain NA1000 / CB15N) GN=cheAI PE=4 SV=1 - [A0A0H3C5E9_CAUCN]	cheAI	1.10878	1.02004	0.966483	0.996539	0.949096	0.97511	1.0462	0.996976	0.994193	0.982163	0.89877	1.01225	1.04937	1.14723	1.02198	1.12256
A0A0H3C5F2	GumN superfamily protein OS=Caulobacter crescentus (strain NA1000 / CB15N) GN=CCNA_00733 PE=4 SV=1 - [A0A0H3C5F2_CAUCN]	CCNA_00733	0.898898	1.00638	0.918457	0.896792	0.957641	0.906667	1.03813	1.13006	1.04365	1.26937	0.997657	0.822181	0.918645	0.978705	0.989108	0.989482
A0A0H3C5F3	CheU protein OS=Caulobacter crescentus (strain NA1000 / CB15N) GN=cheU PE=4 SV=1 - [A0A0H3C5F3_CAUCN]	cheU	1.20443	0.946009	0.970882	1.12934	0.977512	0.959514	0.911652	0.891758	1.00604	0.955791	0.937657	1.05258	1.02231	1.24056	1.177	1.054
A0A0H3C5F5	DegQ-family trypsin-like serine prototease OS=Caulobacter crescentus (strain NA1000 / CB15N) GN=CCNA_00738 PE=4 SV=1 - [A0A0H3C5F5_CAUCN]	CCNA_00738	1.04626	0.937964	0.87663	1.05619	0.911037	1.14831	1.13333	0.947684	1.09347	0.926926	1.00949	1.17968	1.1959	1.1935	0.919776	1.2976
A0A0H3C5F7	Type I protein secretion ATP-binding protein RsaD OS=Caulobacter crescentus (strain NA1000 / CB15N) GN=rsaD PE=4 SV=1 - [A0A0H3C5F7_CAUCN]	rsaD	1.01042	1.02812	1.03087	0.982155	0.969919	0.948676	0.989151	1.00048	1.04372	0.982058	0.972031	1.06279	0.988673	0.980159	1.03529	0.946748
A0A0H3C5F8	Glucosamine-6-phosphate deaminase OS=Caulobacter crescentus (strain NA1000 / CB15N) GN=CCNA_00453 PE=4 SV=1 - [A0A0H3C5F8_CAUCN]	CCNA_00453	1.03297	1.03775	1.05307	0.970906	0.983984	1.01685	1.0391	1.04604	0.91026	0.991488	0.939917	0.918075	0.993364	0.980918	0.954815	1.02734
A0A0H3C5G2	Glycosyltransferase OS=Caulobacter crescentus (strain NA1000 / CB15N) GN=CCNA_01065 PE=4 SV=1 - [A0A0H3C5G2_CAUCN]	CCNA_01065	0.91644	0.945177	0.980978	0.991975	1.03817	0.986661	1.02228	1.03442	1.04304	1.06336	1.08242	0.980898	0.988267	0.93421	1.00539	0.929206
A0A0H3C5G4	WecE-family cell wall biogenesis enzyme OS=Caulobacter crescentus (strain NA1000 / CB15N) GN=CCNA_00234 PE=3 SV=1 - [A0A0H3C5G4_CAUCN]	CCNA_00234	1.08326	0.86727	0.902447	1.15444	1.03517	1.02663	1.0392	1.0003	0.96802	0.991426	1.06571	0.976392	1.03888	1.20036	1.12449	1.06747
A0A0H3C5G5	Ferrous iron transport protein B OS=Caulobacter crescentus (strain NA1000 / CB15N) GN=CCNA_00749 PE=3 SV=1 - [A0A0H3C5G5_CAUCN]	CCNA_00749	1.04753	0.992916	1.06223	0.97354	0.991314	0.999633	0.974088	0.995486	0.929959	1.08406	0.929367	0.857845	0.978505	0.986159	0.973897	1.01259
A0A0H3C5G8	Uncharacterized protein OS=Caulobacter crescentus (strain NA1000 / CB15N) GN=CCNA_01070 PE=4 SV=1 - [A0A0H3C5G8_CAUCN]	CCNA_01070	0.914937	0.877202	0.963317	1.16095	1.13049	1.11839	1.03716	0.994217	0.999645	0.927009	1.26888	1.07835	1.04319	0.949778	1.03805	0.914962
A0A0H3C5G9	Glycosyltransferase OS=Caulobacter crescentus (strain NA1000 / CB15N) GN=CCNA_00466 PE=4 SV=1 - [A0A0H3C5G9_CAUCN]	CCNA_00466	0.903466	0.906699	0.900251	1.05793	1.01034	1.03242	1.16918	1.10307	0.988089	1.05409	1.17097	0.937383	1.05993	1.00357	1.02471	0.979372
A0A0H3C5H2	Cyclohexanol dehydrogenase OS=Caulobacter crescentus (strain NA1000 / CB15N) GN=CCNA_00246 PE=4 SV=1 - [A0A0H3C5H2_CAUCN]	CCNA_00246	0.957825	0.992373	1.03746	1.02877	1.10304	1.07379	0.848019	0.879422	1.12473	0.942921	1.07407	1.19282	0.964291	0.923239	0.958082	0.963633
A0A0H3C5H3	GDP-L-fucose synthase OS=Caulobacter crescentus (strain NA1000 / CB15N) GN=fcl PE=3 SV=1 - [A0A0H3C5H3_CAUCN]	fcl	1.03266	0.973488	0.941198	1.08428	1.07464	1.07976	1.16122	1.0696	0.862103	0.869378	1.04999	0.991632	1.08566	1.09718	1.00419	1.0926
A0A0H3C5H4	Beta/gamma crystallin family protein OS=Caulobacter crescentus (strain NA1000 / CB15N) GN=CCNA_01075 PE=4 SV=1 - [A0A0H3C5H4_CAUCN]	CCNA_01075	0.843803	0.876449	0.876284	1.07631	1.10977	1.12473	1.07158	1.03403	1.1093	1.01412	1.27555	1.09386	1.03631	0.962934	0.956952	1.00625
A0A0H3C5H6	Two component sensor histidine kinase OS=Caulobacter crescentus (strain NA1000 / CB15N) GN=CCNA_00760 PE=4 SV=1 - [A0A0H3C5H6_CAUCN]	CCNA_00760											#DIV/0!	#DIV/0!	#DIV/0!	#DIV/0!	#DIV/0!	#DIV/0!
A0A0H3C5H9	Uncharacterized protein OS=Caulobacter crescentus (strain NA1000 / CB15N) GN=CCNA_01080 PE=4 SV=1 - [A0A0H3C5H9_CAUCN]	CCNA_01080	0.999167	1.06695	0.945905	0.937831	0.80525	0.935623	1.00446	1.22168	1.04732	1.1408	0.938613	0.918054	0.822195	1.05631	1.00236	1.05382
A0A0H3C5I0	Pyridoxal kinase OS=Caulobacter crescentus (strain NA1000 / CB15N) GN=CCNA_00256 PE=3 SV=1 - [A0A0H3C5I0_CAUCN]	CCNA_00256	0.944053	1.01187	0.989436	1.03743	1.05721	1.02375	1.04018	1.05171	0.9605	1.04808	1.09891	0.916439	0.989045	0.954133	1.01337	0.941548
A0A0H3C5I2	HipB transcriptional regulator OS=Caulobacter crescentus (strain NA1000 / CB15N) GN=CCNA_00481 PE=4 SV=1 - [A0A0H3C5I2_CAUCN]	CCNA_00481	0.950255	1.0004	0.939833	1.00915	0.992956	1.01207	0.979863	1.07139	1.15628	0.971816	1.06197	1.18981	0.914571	1.01109	0.997108	1.01402
A0A0H3C5I3	Cytosine-specific methyltransferase OS=Caulobacter crescentus (strain NA1000 / CB15N) GN=CCNA_01085 PE=3 SV=1 - [A0A0H3C5I3_CAUCN]	CCNA_01085	0.973871	0.81193	0.814133	1.07791	1.11582	1.0353	1.05006	1.03189	1.18576	0.965264	1.10683	1.22843	1.01761	1.19621	1.04115	1.14892
A0A0H3C5I4	Uncharacterized protein OS=Caulobacter crescentus (strain NA1000 / CB15N) GN=CCNA_00765 PE=4 SV=1 - [A0A0H3C5I4_CAUCN]	CCNA_00765	0.956487	0.992223	0.945645	1.01051	1.04843	0.955908	1.06998	1.02397	1.01355	1.06821	1.05648	0.948831	1.04493	1.01147	1.05712	0.956813
A0A0H3C5I7	2-dehydropantoate 2-reductase OS=Caulobacter crescentus (strain NA1000 / CB15N) GN=CCNA_00262 PE=3 SV=1 - [A0A0H3C5I7_CAUCN]	CCNA_00262	0.969659	0.93673	0.998539	1.09239	1.06141	1.04694	1.02523	1.03055	0.987963	0.896907	1.12657	1.10152	0.994835	0.971079	1.04341	0.93068
A0A0H3C5I8	Peptide methionine sulfoxide reductase MsrA OS=Caulobacter crescentus (strain NA1000 / CB15N) GN=msrA PE=3 SV=1 - [A0A0H3C5I8_CAUCN]	msrA	0.860724	0.995716	0.898521	1.27494	0.969367	0.570752	0.877149	1.08463	1.14731	1.29781	1.48124	0.884033	0.80871	0.957934	2.23379	0.428838
A0A0H3C5I9	TetR family transcriptional regulator OS=Caulobacter crescentus (strain NA1000 / CB15N) GN=CCNA_00770 PE=4 SV=1 - [A0A0H3C5I9_CAUCN]	CCNA_00770	0.984113	1.0259	1.10662	0.927619	0.903765	0.938348	1.04487	1.1965	0.889905	1.00551	0.942594	0.885026	0.873268	0.889298	0.988566	0.899584
A0A0H3C5J0	Putative polyketide cyclase-dehydrase/lipid transport protein OS=Caulobacter crescentus (strain NA1000 / CB15N) GN=CCNA_00493 PE=4 SV=1 - [A0A0H3C5J0_CAUCN]	CCNA_00493											#DIV/0!	#DIV/0!	#DIV/0!	#DIV/0!	#DIV/0!	#DIV/0!
A0A0H3C5J2	MutT-like protein OS=Caulobacter crescentus (strain NA1000 / CB15N) GN=CCNA_00267 PE=3 SV=1 - [A0A0H3C5J2_CAUCN]	CCNA_00267	0.93125	0.928792	0.89994	1.16385	1.16988	1.11917	0.951776	0.96341	1.02928	0.985102	1.24977	1.04485	0.987924	1.03479	1.03992	0.995067
A0A0H3C5J6	Hydroxymethylglutaryl-CoA lyase OS=Caulobacter crescentus (strain NA1000 / CB15N) GN=CCNA_00500 PE=4 SV=1 - [A0A0H3C5J6_CAUCN]	CCNA_00500	0.949028	0.913952	0.947211	1.03599	1.02971	1.05794	0.995632	1.07783	1.05259	0.976726	1.09164	1.07767	0.923737	1.00192	0.979255	1.02314
A0A0H3C5J8	Alpha/beta hydrolase family protein OS=Caulobacter crescentus (strain NA1000 / CB15N) GN=CCNA_01105 PE=4 SV=1 - [A0A0H3C5J8_CAUCN]	CCNA_01105	1.01613	1.01848	0.95587	1.01766	1.07235	1.04411	1.0312	0.9615	1.0109	0.967179	1.00151	1.0452	1.07249	1.06304	0.974667	1.09067
A0A0H3C5J9	Two-component receiver protein CpdR OS=Caulobacter crescentus (strain NA1000 / CB15N) GN=cpdR PE=4 SV=1 - [A0A0H3C5J9_CAUCN]	cpdR	1.08368	1.01365	1.0155	1.04244	1.00993	1.0006	1.00634	0.952718	0.971979	0.875289	0.961949	1.11047	1.05628	1.06714	1.04182	1.0243
A0A0H3C5K1	Ubiquinol-cytochrome c reductase iron-sulfur subunit OS=Caulobacter crescentus (strain NA1000 / CB15N) GN=CCNA_00505 PE=4 SV=1 - [A0A0H3C5K1_CAUCN]	CCNA_00505	1.06658	1.06548	1.06204	1.03709	1.00946	1.02447	0.984376	1.02073	0.896094	0.931377	0.97235	0.962118	0.964382	1.00428	1.01232	0.992057
A0A0H3C5K2	Pyrimidine 5'-nucleotidase family protein OS=Caulobacter crescentus (strain NA1000 / CB15N) GN=CCNA_00284 PE=4 SV=1 - [A0A0H3C5K2_CAUCN]	CCNA_00284	1.00573	0.980762	1.02955	1.08753	1.06679	1.0406	0.89665	0.89073	1.02743	0.967347	1.08134	1.06211	1.00665	0.976856	1.0451	0.934705
A0A0H3C5K3	2-dehydro-3-deoxygluconokinase OS=Caulobacter crescentus (strain NA1000 / CB15N) GN=CCNA_01110 PE=4 SV=1 - [A0A0H3C5K3_CAUCN]	CCNA_01110	0.984261	0.940218	0.952013	1.10814	1.08205	1.1193	1.00962	0.986672	0.931419	0.93393	1.12586	0.997311	1.02325	1.03387	0.990037	1.04428
A0A0H3C5K4	Chemotaxis motA protein OS=Caulobacter crescentus (strain NA1000 / CB15N) GN=motA PE=4 SV=1 - [A0A0H3C5K4_CAUCN]	motA	0.997862	1.01669	1.07915	1.06152	1.01409	1.02552	1.0652	1.02014	0.903297	0.957479	1.0638	0.943412	1.04417	0.924676	1.03511	0.893311
A0A0H3C5K6	Carboxymethylenebutenolidase OS=Caulobacter crescentus (strain NA1000 / CB15N) GN=CCNA_00510 PE=4 SV=1 - [A0A0H3C5K6_CAUCN]	CCNA_00510	0.851884	0.975111	1.03354	1.31603	1.43254	1.36003	0.871069	0.848671	0.828802	0.602944	1.54484	1.37459	1.02639	0.824236	0.967646	0.851795
A0A0H3C5K7	Autotransporter protein OS=Caulobacter crescentus (strain NA1000 / CB15N) GN=CCNA_00290 PE=4 SV=1 - [A0A0H3C5K7_CAUCN]	CCNA_00290	1.00259	1.01223	0.974652	0.977485	0.981043	0.979315	1.00997	0.985006	1.03933	1.07682	0.974955	0.965185	1.02534	1.02867	0.998131	1.0306
A0A0H3C5L3	Imidazolonepropionase-related amidohydrolase OS=Caulobacter crescentus (strain NA1000 / CB15N) GN=CCNA_00302 PE=4 SV=1 - [A0A0H3C5L3_CAUCN]	CCNA_00302	1.01386	1.06116	1.04028	1.03647	1.04755	1.03934	0.961058	0.951719	0.953592	0.857509	1.0223	1.11205	1.00981	0.974604	0.997243	0.977299
A0A0H3C5L5	Protein tyrosine phosphatase CtpA OS=Caulobacter crescentus (strain NA1000 / CB15N) GN=ctpA PE=4 SV=1 - [A0A0H3C5L5_CAUCN]	ctpA	0.959816	1.06709	0.936047	0.966917	1.00073	0.978123	1.04099	0.997441	1.08488	1.03471	1.0074	1.04849	1.04366	1.02539	0.988543	1.03728
A0A0H3C5L6	ASC-1 homology domain protein OS=Caulobacter crescentus (strain NA1000 / CB15N) GN=CCNA_00804 PE=4 SV=1 - [A0A0H3C5L6_CAUCN]	CCNA_00804	1.04362	1.07272	1.07486	0.980505	0.956308	0.96746	1.0651	1.01617	0.992297	0.917984	0.939526	1.08095	1.04815	0.97093	1.01348	0.958012
A0A0H3C5L8	Peptidase, M14 family OS=Caulobacter crescentus (strain NA1000 / CB15N) GN=CCNA_00313 PE=4 SV=1 - [A0A0H3C5L8_CAUCN]	CCNA_00313	1.00354	1.00528	1.00877	1.00491	0.981527	0.974477	0.985566	0.99733	1.00094	1.01333	1.00136	0.987767	0.988204	0.994815	1.03123	0.964691
A0A0H3C5L9	Flavin-binding monooxygenase-related protein OS=Caulobacter crescentus (strain NA1000 / CB15N) GN=CCNA_00813 PE=4 SV=1 - [A0A0H3C5L9_CAUCN]	CCNA_00813	1.09186	1.1565	0.945131	0.846351	0.859855	0.940344	0.857996	1.00207	1.08888	1.18228	0.775146	0.920997	0.856223	1.15525	0.900044	1.28355
A0A0H3C5M1	50S ribosomal protein L21 OS=Caulobacter crescentus (strain NA1000 / CB15N) GN=rplU PE=3 SV=1 - [A0A0H3C5M1_CAUCN]	rplU	0.985669	1.00364	0.994622	0.95671	0.97737	0.987726	1.02636	1.06501	1.032	1.04454	0.970621	0.988	0.963708	0.990998	0.968599	1.02313
A0A0H3C5M4	FMN-binding nitroreductase family enzyme OS=Caulobacter crescentus (strain NA1000 / CB15N) GN=CCNA_00327 PE=4 SV=1 - [A0A0H3C5M4_CAUCN]	CCNA_00327	0.93779	1.0172	1.03284	0.990519	0.966859	1.02277	1.05127	1.17002	1.00553	0.959035	1.05623	1.04848	0.898507	0.907975	0.96847	0.937535
A0A0H3C5M5	GntR-family transcriptional regulator OS=Caulobacter crescentus (strain NA1000 / CB15N) GN=CCNA_00824 PE=4 SV=1 - [A0A0H3C5M5_CAUCN]	CCNA_00824	0.965521	1.0568	1.04943	1.0437	1.00581	0.977765	0.9785	1.10315	0.960002	0.93146	1.08097	1.03064	0.887003	0.92004	1.06744	0.861915
A0A0H3C5M8	Histidine protein kinase DivJ OS=Caulobacter crescentus (strain NA1000 / CB15N) GN=divJ PE=4 SV=1 - [A0A0H3C5M8_CAUCN]	divJ	1.0134	0.981421	0.978869	1.21694	1.14649	1.23162	0.832732	0.818117	0.876541	0.825103	1.20086	1.06234	1.01786	1.03527	0.988085	1.04776
A0A0H3C5M9	Integral membrane protein OS=Caulobacter crescentus (strain NA1000 / CB15N) GN=CCNA_00516 PE=4 SV=1 - [A0A0H3C5M9_CAUCN]	CCNA_00516	1.00376	0.963128	1.01721	0.943037	0.947157	0.95371	1.08275	1.1413	0.999687	1.06824	0.939508	0.935823	0.948699	0.986772	0.988809	0.99794
A0A0H3C5N1	TonB-dependent receptor OS=Caulobacter crescentus (strain NA1000 / CB15N) GN=CCNA_00338 PE=4 SV=1 - [A0A0H3C5N1_CAUCN]	CCNA_00338	1.23156	1.26558	1.29021	0.820669	0.883709	0.868978	0.81518	0.957309	0.971929	0.817441	0.666368	1.18899	0.851533	0.95454	0.944407	1.01073
A0A0H3C5N3	MA superfamily peptidase OS=Caulobacter crescentus (strain NA1000 / CB15N) GN=CCNA_01121 PE=4 SV=1 - [A0A0H3C5N3_CAUCN]	CCNA_01121	1.26483	1.27885	1.09677	0.759725	0.781806	0.718567	1.29514	1.28249	0.850299	0.795816	0.600652	1.06846	1.00986	1.15324	1.05728	1.09076
A0A0H3C5N4	Uncharacterized protein OS=Caulobacter crescentus (strain NA1000 / CB15N) GN=CCNA_00344 PE=4 SV=1 - [A0A0H3C5N4_CAUCN]	CCNA_00344	0.977282	0.877586	0.914326	1.21929	1.15757	1.20187	0.890286	0.886865	1.00666	0.934063	1.24763	1.07773	1.00386	1.06885	1.01449	1.05359
A0A0H3C5N6	Tyrosine recombinase XerC OS=Caulobacter crescentus (strain NA1000 / CB15N) GN=xerC PE=3 SV=1 - [A0A0H3C5N6_CAUCN]	xerC	0.983684	0.946146	0.970791	1.14089	1.10448	1.12241	0.815296	0.891605	1.04409	0.899038	1.15981	1.16134	0.914414	1.01328	1.01646	0.996872
A0A0H3C5P1	Uncharacterized protein OS=Caulobacter crescentus (strain NA1000 / CB15N) GN=CCNA_00532 PE=4 SV=1 - [A0A0H3C5P1_CAUCN]	CCNA_00532	0.860488	0.871435	0.69986	1.31136	1.36401	1.55923	0.842255	1.00086	0.99562	0.670345	1.52398	1.48524	0.841529	1.22952	0.841031	1.46191
A0A0H3C5P3	SH3 domain-containing cell surface protein OS=Caulobacter crescentus (strain NA1000 / CB15N) GN=CCNA_00359 PE=4 SV=1 - [A0A0H3C5P3_CAUCN]	CCNA_00359	1.03728	1.04716	1.03983	1.01615	1.00999	1.00426	1.01081	1.02731	1.01949	1.06012	0.979629	0.961672	0.983933	0.997548	1.01184	0.98588
A0A0H3C5P6	Methyl-accepting chemotaxis protein OS=Caulobacter crescentus (strain NA1000 / CB15N) GN=CCNA_00538 PE=4 SV=1 - [A0A0H3C5P6_CAUCN]	CCNA_00538	1.03361	0.977779	1.0422	1.0026	1.06559	1.00921	0.887668	1.25519	0.997321	0.872853	0.969998	1.1426	0.707197	0.991759	0.99345	0.998298
A0A0H3C5P8	Deoxyhypusine synthase-like protein OS=Caulobacter crescentus (strain NA1000 / CB15N) GN=CCNA_00364 PE=3 SV=1 - [A0A0H3C5P8_CAUCN]	CCNA_00364	1.06376	1.02599	1.05935	0.953569	0.915096	0.91935	1.06884	1.01338	0.970173	1.07438	0.896413	0.903011	1.05473	1.00416	1.03722	0.968129
A0A0H3C5P9	Uncharacterized protein OS=Caulobacter crescentus (strain NA1000 / CB15N) GN=CCNA_01138 PE=4 SV=1 - [A0A0H3C5P9_CAUCN]	CCNA_01138	0.959487	1.04633	0.924522	1.12397	1.00019	1.07845	0.927855	1.06974	0.994163	0.957992	1.17143	1.03776	0.867362	1.03782	1.0422	0.995792
A0A0H3C5Q0	Acetyl-CoA acetyltransferase OS=Caulobacter crescentus (strain NA1000 / CB15N) GN=CCNA_00544 PE=3 SV=1 - [A0A0H3C5Q0_CAUCN]	CCNA_00544	1.10236	1.06833	1.11932	1.08228	1.02724	1.07906	0.887378	0.883768	0.885862	0.92394	0.981786	0.958787	1.00408	0.984844	1.00299	0.98191
A0A0H3C5Q1	Bifunctional protein PutA OS=Caulobacter crescentus (strain NA1000 / CB15N) GN=CCNA_00846 PE=3 SV=1 - [A0A0H3C5Q1_CAUCN]	CCNA_00846	1.07972	1.07607	1.12256	1.02592	1.00992	1.00333	0.971395	0.959619	0.819633	0.897419	0.950167	0.913322	1.01227	0.96184	1.02252	0.940659
A0A0H3C5Q3	Magnesium and cobalt efflux protein corC-like protein OS=Caulobacter crescentus (strain NA1000 / CB15N) GN=CCNA_00369 PE=4 SV=1 - [A0A0H3C5Q3_CAUCN]	CCNA_00369	1.08727	1.09735	1.06554	0.931464	0.883797	1.01304	1.02241	1.13619	0.887506	0.97391	0.856701	0.911281	0.899859	1.02039	0.91947	1.10976
A0A0H3C5Q4	Cytochrome c oxidase polypeptide II OS=Caulobacter crescentus (strain NA1000 / CB15N) GN=CCNA_01144 PE=4 SV=1 - [A0A0H3C5Q4_CAUCN]	CCNA_01144	1.00865	0.951193	0.937583	1.08164	1.09601	1.1114	0.943654	0.964023	1.04285	0.906586	1.07237	1.15031	0.978871	1.07579	0.973222	1.10539
A0A0H3C5Q6	DeoR-family transcriptional regulator OS=Caulobacter crescentus (strain NA1000 / CB15N) GN=CCNA_01151 PE=4 SV=1 - [A0A0H3C5Q6_CAUCN]	CCNA_01151	0.98957	0.885443	0.939531	1.10621	0.97855	1.08093	0.927034	1.12774	1.07187	0.986134	1.11787	1.08694	0.82203	1.05326	1.02339	1.02919
A0A0H3C5Q7	Periplasmic multidrug efflux lipoprotein OS=Caulobacter crescentus (strain NA1000 / CB15N) GN=CCNA_00851 PE=3 SV=1 - [A0A0H3C5Q7_CAUCN]	CCNA_00851	0.812673	0.794578	0.800978	0.935776	0.929326	0.95299	1.10576	1.18089	1.25657	1.34482	1.15148	0.93438	0.93638	1.0146	0.981936	1.03327
A0A0H3C5Q9	Maf-like protein CCNA_00002 OS=Caulobacter crescentus (strain NA1000 / CB15N) GN=CCNA_00002 PE=3 SV=1 - [A0A0H3C5Q9_CAUCN]	CCNA_00002	1.08267	1.13926	1.13199	0.889601	0.868585	0.900891	0.974854	0.955228	1.00279	1.03598	0.82167	0.967958	1.02055	0.956432	0.987467	0.96857
A0A0H3C5R0	Methyltransferase OS=Caulobacter crescentus (strain NA1000 / CB15N) GN=CCNA_00554 PE=4 SV=1 - [A0A0H3C5R0_CAUCN]	CCNA_00554	0.904608	0.920731	0.983457	1.18605	1.17243	1.22805	0.982997	0.916848	0.920474	0.873382	1.31112	1.05392	1.07215	0.919825	0.965802	0.952395
A0A0H3C5R1	Sulfotransferase family protein OS=Caulobacter crescentus (strain NA1000 / CB15N) GN=CCNA_01156 PE=4 SV=1 - [A0A0H3C5R1_CAUCN]	CCNA_01156	1.07741	1.02163	1.02129	0.914279	1.01545	1.01579	0.989144	1.0404	1.0087	1.05513	0.848593	0.956002	0.950735	1.05495	0.900071	1.17207
A0A0H3C5R2	Conserved hypothetical cytosolic protein OS=Caulobacter crescentus (strain NA1000 / CB15N) GN=CCNA_00380 PE=4 SV=1 - [A0A0H3C5R2_CAUCN]	CCNA_00380	0.989674	1.10409	0.937029	1.04178	1.12207	1.14009	0.987102	0.82604	0.957758	0.904494	1.05265	1.05889	1.19498	1.05618	0.913778	1.15584
A0A0H3C5R3	Chaperone protein DnaJ OS=Caulobacter crescentus (strain NA1000 / CB15N) GN=dnaJ PE=3 SV=1 - [A0A0H3C5R3_CAUCN]	dnaJ	0.836521	0.85838	0.831088	1.00852	0.978196	0.976355	1.00373	0.857103	1.38087	1.21425	1.20561	1.13722	1.17107	1.00654	1.03294	0.974436
A0A0H3C5R5	Phosphohistidine phosphatase SixA OS=Caulobacter crescentus (strain NA1000 / CB15N) GN=sixA PE=4 SV=1 - [A0A0H3C5R5_CAUCN]	sixA	0.971716	1.04797	1.01436	1.02283	0.940792	0.999567	1.0149	1.0569	1.01113	0.991253	1.05261	1.02005	0.960265	0.957958	1.02328	0.936167
A0A0H3C5R6	Beta-D-glucoside glucohydrolase OS=Caulobacter crescentus (strain NA1000 / CB15N) GN=CCNA_01162 PE=3 SV=1 - [A0A0H3C5R6_CAUCN]	CCNA_01162	1.02585	0.991825	0.979486	1.0717	1.08895	1.09882	0.97624	0.949336	0.967404	0.944838	1.04469	1.02388	1.02834	1.04734	0.975319	1.07384
A0A0H3C5R8	Cyclic pyranopterin monophosphate synthase OS=Caulobacter crescentus (strain NA1000 / CB15N) GN=moaA PE=3 SV=1 - [A0A0H3C5R8_CAUCN]	moaA	1.02125	1.07716	1.02166	0.956286	1.03889	0.989589	0.896128	0.959538	1.06654	0.98947	0.936391	1.07789	0.933917	0.999594	0.966346	1.03441
A0A0H3C5S0	Gamma-glutamyltranspeptidase OS=Caulobacter crescentus (strain NA1000 / CB15N) GN=CCNA_00565 PE=4 SV=1 - [A0A0H3C5S0_CAUCN]	CCNA_00565	1.0588	1.0345	1.0394	0.920913	0.978694	0.969489	0.998051	1.02431	0.93409	1.12186	0.869771	0.832624	0.97436	1.01866	0.949896	1.07239
A0A0H3C5S1	Dihydroorotase OS=Caulobacter crescentus (strain NA1000 / CB15N) GN=CCNA_00392 PE=3 SV=1 - [A0A0H3C5S1_CAUCN]	CCNA_00392	0.935523	0.951171	0.923696	1.05444	1.03352	1.07912	0.93044	0.955335	1.03922	1.0931	1.12711	0.950714	0.973941	1.0128	0.977125	1.03651
A0A0H3C5S3	Putative periplasmic protein OS=Caulobacter crescentus (strain NA1000 / CB15N) GN=CCNA_00023 PE=4 SV=1 - [A0A0H3C5S3_CAUCN]	CCNA_00023	1.009	0.95793	1.07761	1.07272	1.0968	1.05638	1.04023	0.985983	0.870463	0.915704	1.06315	0.950595	1.05501	0.936331	1.01547	0.922071
A0A0H3C5S4	Uncharacterized protein OS=Caulobacter crescentus (strain NA1000 / CB15N) GN=CCNA_00867 PE=4 SV=1 - [A0A0H3C5S4_CAUCN]	CCNA_00867	0.939578	0.94793	0.989558	0.910135	0.987065	1.01509	1.04158	1.07118	1.03389	1.15923	0.968664	0.891872	0.972368	0.949492	0.896603	1.05899
A0A0H3C5S6	Acetolactate synthase OS=Caulobacter crescentus (strain NA1000 / CB15N) GN=CCNA_00397 PE=4 SV=1 - [A0A0H3C5S6_CAUCN]	CCNA_00397	1.02557	1.02646	1.06692	1.16151	1.06411	1.07288	0.935021	0.892184	0.903883	0.869352	1.13255	1.03972	1.04801	0.961252	1.08262	0.887897
A0A0H3C5S7	TonB-dependent receptor OS=Caulobacter crescentus (strain NA1000 / CB15N) GN=CCNA_00028 PE=3 SV=1 - [A0A0H3C5S7_CAUCN]	CCNA_00028	1.15049	1.13786	1.13323	0.844664	0.86009	0.850993	0.890659	0.898959	0.915721	1.16557	0.73418	0.78564	0.990766	1.01523	0.992562	1.02283
A0A0H3C5S8	AIM24 family protein OS=Caulobacter crescentus (strain NA1000 / CB15N) GN=CCNA_01172 PE=4 SV=1 - [A0A0H3C5S8_CAUCN]	CCNA_01172	1.0041	0.919385	0.939541	1.01458	1.0232	1.04284	0.975668	1.07189	0.942762	1.04581	1.01043	0.901465	0.910229	1.06872	0.972903	1.09848
A0A0H3C5T2	tRNA pseudouridine synthase B OS=Caulobacter crescentus (strain NA1000 / CB15N) GN=truB PE=3 SV=1 - [A0A0H3C5T2_CAUCN]	truB	1.03288	1.04558	1.00028	0.939945	0.926255	0.902901	1.09419	1.05208	1.0293	1.08237	0.910025	0.950973	1.04002	1.03258	1.04103	0.991889
A0A0H3C5T3	Sulfite reductase, beta subunit OS=Caulobacter crescentus (strain NA1000 / CB15N) GN=cysI PE=4 SV=1 - [A0A0H3C5T3_CAUCN]	cysI	0.98224	0.992878	1.00932	0.912267	0.907408	0.888881	1.20982	1.15371	0.966355	1.09565	0.928762	0.881996	1.04864	0.973173	1.02631	0.948226
A0A0H3C5T4	Acetyltransferase OS=Caulobacter crescentus (strain NA1000 / CB15N) GN=CCNA_00407 PE=4 SV=1 - [A0A0H3C5T4_CAUCN]	CCNA_00407	0.833321	0.892732	0.893668	1.34676	1.24551	1.278	0.87222	0.903118	0.946081	0.870713	1.61613	1.08656	0.965787	0.932473	1.0538	0.884869
A0A0H3C5T5	Uncharacterized protein OS=Caulobacter crescentus (strain NA1000 / CB15N) GN=CCNA_00582 PE=4 SV=1 - [A0A0H3C5T5_CAUCN]	CCNA_00582	0.894765	1.10218	1.03136	0.920556	0.956645	0.8338	1.38467	1.41011	0.920579	0.881744	1.02882	1.04404	0.981959	0.867559	1.10405	0.785798
A0A0H3C5T6	ATP-dependent RNA helicase OS=Caulobacter crescentus (strain NA1000 / CB15N) GN=CCNA_00878 PE=4 SV=1 - [A0A0H3C5T6_CAUCN]	CCNA_00878	1.10946	1.00402	1.03948	0.91666	1.03408	1.03833	1.08358	1.04322	0.89679	0.899345	0.826219	0.99716	1.03869	1.06733	0.882821	1.209
A0A0H3C5T7	Glutathione S-transferase OS=Caulobacter crescentus (strain NA1000 / CB15N) GN=CCNA_01182 PE=3 SV=1 - [A0A0H3C5T7_CAUCN]	CCNA_01182	1.05505	1.0679	1.05045	1.0199	0.918641	0.95086	1.03238	0.977087	0.92472	1.03549	0.966685	0.893027	1.05659	1.00438	1.0726	0.936393
A0A0H3C5T8	Translation initiation factor IF-2 OS=Caulobacter crescentus (strain NA1000 / CB15N) GN=infB PE=3 SV=1 - [A0A0H3C5T8_CAUCN]	infB	0.984526	0.927049	0.978427	0.94543	0.96604	0.946007	1.10989	1.12977	1.03816	1.08676	0.96029	0.955282	0.9824	1.00623	0.99939	1.00685
A0A0H3C5T9	CoA pyrophosphatase OS=Caulobacter crescentus (strain NA1000 / CB15N) GN=CCNA_00412 PE=4 SV=1 - [A0A0H3C5T9_CAUCN]	CCNA_00412											#DIV/0!	#DIV/0!	#DIV/0!	#DIV/0!	#DIV/0!	#DIV/0!
A0A0H3C5U2	S-adenosylmethionine synthetase OS=Caulobacter crescentus (strain NA1000 / CB15N) GN=metK PE=3 SV=1 - [A0A0H3C5U2_CAUCN]	metK	1.16369	1.11154	1.15142	0.924384	0.928426	0.894393	1.0121	1.00644	0.9313	0.909786	0.794352	1.02365	1.00563	1.01066	1.03353	0.977874
A0A0H3C5U4	Conserved hypothetical membrane protein OS=Caulobacter crescentus (strain NA1000 / CB15N) GN=CCNA_00417 PE=4 SV=1 - [A0A0H3C5U4_CAUCN]	CCNA_00417	1.16242	1.08832	1.13012	1.00275	1.05437	0.905605	1.11611	1.0962	0.790486	0.785003	0.862642	1.00698	1.01817	1.02858	1.10727	0.928928
A0A0H3C5U5	Lumazine-binding domain protein OS=Caulobacter crescentus (strain NA1000 / CB15N) GN=CCNA_00889 PE=4 SV=1 - [A0A0H3C5U5_CAUCN]	CCNA_00889	0.820893	0.880955	0.832959	1.08965	1.03818	1.06511	0.934287	0.945102	1.17336	1.22522	1.3274	0.957669	0.988557	0.985514	1.02304	0.96332
A0A0H3C5U7	tRNA-2-methylthio-N(6)-dimethylallyladenosine synthase OS=Caulobacter crescentus (strain NA1000 / CB15N) GN=miaB PE=3 SV=1 - [A0A0H3C5U7_CAUCN]	miaB	1.05082	1.02831	0.970618	0.904356	0.928463	0.904756	1.08198	1.01349	0.990648	1.05345	0.860618	0.940383	1.06759	1.08263	0.999558	1.08311
A0A0H3C5U8	4-hydroxy-3-methylbut-2-en-1-yl diphosphate synthase (flavodoxin) OS=Caulobacter crescentus (strain NA1000 / CB15N) GN=ispG PE=3 SV=1 - [A0A0H3C5U8_CAUCN]	ispG	0.913406	0.905288	0.949965	1.11267	1.06933	1.08627	0.962443	0.955607	1.04197	1.02826	1.21816	1.01333	1.00715	0.961515	1.02431	0.9387
A0A0H3C5V0	Alpha-1,2-mannosidase OS=Caulobacter crescentus (strain NA1000 / CB15N) GN=CCNA_00610 PE=4 SV=1 - [A0A0H3C5V0_CAUCN]	CCNA_00610	1.02595	0.973857	1.02042	1.07157	0.966696	1.04499	0.976224	0.987951	0.975109	0.995697	1.04446	0.979323	0.98813	1.00542	1.02544	0.98048
A0A0H3C5V1	Mitochondrial-type Fe-S cluster assembly protein NFU OS=Caulobacter crescentus (strain NA1000 / CB15N) GN=CCNA_00060 PE=4 SV=1 - [A0A0H3C5V1_CAUCN]	CCNA_00060	0.819853	0.798209	0.797033	1.11656	1.10343	1.14609	0.926866	0.780563	1.43625	1.06708	1.3619	1.34597	1.18743	1.02863	0.974232	1.05584
A0A0H3C5V2	TonB-dependent receptor OS=Caulobacter crescentus (strain NA1000 / CB15N) GN=CCNA_00615 PE=3 SV=1 - [A0A0H3C5V2_CAUCN]	CCNA_00615	1.18967	1.31913	1.19388	0.911344	0.964415	0.92882	0.89699	0.958565	0.800916	0.880757	0.76605	0.909349	0.935764	0.996466	0.981184	1.01557
A0A0H3C5V3	Peptide chain release factor 1 OS=Caulobacter crescentus (strain NA1000 / CB15N) GN=prfA PE=3 SV=1 - [A0A0H3C5V3_CAUCN]	prfA	1.04295	1.02655	1.00709	0.94442	0.959123	0.977979	1.02217	1.0677	0.982778	1.02723	0.905532	0.956727	0.957354	1.0356	0.965686	1.0724
A0A0H3C5V4	S-adenosylmethionine-dependent methyltransferase OS=Caulobacter crescentus (strain NA1000 / CB15N) GN=CCNA_00065 PE=4 SV=1 - [A0A0H3C5V4_CAUCN]	CCNA_00065	1.07252	1.02356	1.05927	0.916089	0.886923	1.0302	1.12959	0.972609	1.05247	1.06477	0.854143	0.988448	1.1614	1.01251	0.889236	1.13863
A0A0H3C5V7	Inositol ABC transport system, permease protein IatP OS=Caulobacter crescentus (strain NA1000 / CB15N) GN=iatP PE=3 SV=1 - [A0A0H3C5V7_CAUCN]	iatP	1.37704	1.06328	1.33416	0.915534	0.873269	0.847037	0.984217	1.02885	0.82335	0.756253	0.664854	1.08872	0.956619	1.03214	1.08087	0.954919
A0A0H3C5V9	Uncharacterized protein OS=Caulobacter crescentus (strain NA1000 / CB15N) GN=CCNA_00428 PE=4 SV=1 - [A0A0H3C5V9_CAUCN]	CCNA_00428	1.02924	0.966612	0.954796	1.1007	1.14784	1.1479	0.917219	0.809186	0.972207	0.947994	1.06943	1.02554	1.13351	1.07797	0.958885	1.12419
A0A0H3C5W1	Two-component receiver domain protein OS=Caulobacter crescentus (strain NA1000 / CB15N) GN=CCNA_00625 PE=4 SV=1 - [A0A0H3C5W1_CAUCN]	CCNA_00625	0.84423	1.53883	1.2519	1.05221	1.08386	1.0983	0.817006	0.678572	0.873939	0.710659	1.24635	1.22976	1.20401	0.674361	0.958037	0.703899
A0A0H3C5W3	Uncharacterized protein OS=Caulobacter crescentus (strain NA1000 / CB15N) GN=CCNA_00909 PE=4 SV=1 - [A0A0H3C5W3_CAUCN]	CCNA_00909	1.07878	1.10896	1.03532	0.991765	1.04233	0.999704	0.934963	0.928958	1.01788	0.894828	0.91934	1.13751	1.00646	1.04197	0.992058	1.05031
A0A0H3C5W5	Uncharacterized protein OS=Caulobacter crescentus (strain NA1000 / CB15N) GN=CCNA_00438 PE=4 SV=1 - [A0A0H3C5W5_CAUCN]	CCNA_00438	1.39666	1.31941	1.25037	1.02574	0.830847	0.691403	0.943894	1.00314	0.735369	0.779529	0.734424	0.94335	0.940937	1.117	1.48356	0.752917
A0A0H3C5W7	Sugar kinase OS=Caulobacter crescentus (strain NA1000 / CB15N) GN=CCNA_01192 PE=4 SV=1 - [A0A0H3C5W7_CAUCN]	CCNA_01192											#DIV/0!	#DIV/0!	#DIV/0!	#DIV/0!	#DIV/0!	#DIV/0!
A0A0H3C5W8	Acetyltransferase OS=Caulobacter crescentus (strain NA1000 / CB15N) GN=CCNA_00914 PE=4 SV=1 - [A0A0H3C5W8_CAUCN]	CCNA_00914	1.07703	1.02564	1.07776	1.01301	1.12061	1.07841	0.919533	0.909082	0.866165	0.91729	0.940565	0.944265	1.0115	0.999315	0.939361	1.06382
A0A0H3C5W9	Uncharacterized protein OS=Caulobacter crescentus (strain NA1000 / CB15N) GN=CCNA_00081 PE=4 SV=1 - [A0A0H3C5W9_CAUCN]	CCNA_00081	1.03093	0.811621	0.92928	1.08738	1.24647	1.08636	0.929468	0.938005	1.1065	0.893658	1.05476	1.23817	0.990899	1.10938	1.00094	1.10834
A0A0H3C5X0	Chemotaxis protein cheW OS=Caulobacter crescentus (strain NA1000 / CB15N) GN=CCNA_00443 PE=4 SV=1 - [A0A0H3C5X0_CAUCN]	CCNA_00443	1.10174	0.977349	0.896264	1.23376	1.04108	1.06239	1.01623	0.989432	0.88992	0.919965	1.11983	0.967342	1.02709	1.22926	1.1613	1.05852
A0A0H3C5X1	CHASE2 membrane receptor OS=Caulobacter crescentus (strain NA1000 / CB15N) GN=CCNA_00635 PE=4 SV=1 - [A0A0H3C5X1_CAUCN]	CCNA_00635	1.06525	1.05523	1.06948	0.928133	1.0254	1.00745	1.07753	1.13507	0.921916	0.844841	0.871286	1.09123	0.949308	0.996044	0.921272	1.08116
A0A0H3C5X2	CheYIII OS=Caulobacter crescentus (strain NA1000 / CB15N) GN=cheYIII PE=4 SV=1 - [A0A0H3C5X2_CAUCN]	cheYIII											#DIV/0!	#DIV/0!	#DIV/0!	#DIV/0!	#DIV/0!	#DIV/0!
A0A0H3C5X4	Conserved membrane spanning protein OS=Caulobacter crescentus (strain NA1000 / CB15N) GN=CCNA_00087 PE=4 SV=1 - [A0A0H3C5X4_CAUCN]	CCNA_00087	0.980364	0.916703	1.09564	1.10913	0.977374	0.996268	1.01245	1.09185	1.00438	0.916236	1.13134	1.0962	0.927283	0.894789	1.11328	0.803739
A0A0H3C5X5	GntR-family transcriptional regulator OS=Caulobacter crescentus (strain NA1000 / CB15N) GN=CCNA_00454 PE=4 SV=1 - [A0A0H3C5X5_CAUCN]	CCNA_00454	0.98053	1.11027	0.933805	1.08481	1.09744	0.9847	0.957632	0.865649	1.06315	0.930875	1.10635	1.1421	1.10626	1.05004	1.10167	0.953133
A0A0H3C5Y0	Membrane alanine aminopeptidase OS=Caulobacter crescentus (strain NA1000 / CB15N) GN=CCNA_01202 PE=4 SV=1 - [A0A0H3C5Y0_CAUCN]	CCNA_01202	1.07463	1.06238	1.06837	1.05603	1.04085	1.04794	0.98076	1.00008	0.846785	0.825562	0.982697	1.02571	0.980678	1.00586	1.00773	0.998149
A0A0H3C5Y2	Oligosaccharide translocase/flippase OS=Caulobacter crescentus (strain NA1000 / CB15N) GN=CCNA_00467 PE=4 SV=1 - [A0A0H3C5Y2_CAUCN]	CCNA_00467	0.990458	0.994986	0.911407	0.983426	1.04619	1.01513	1.10742	1.21846	0.986567	0.942133	0.9929	1.04716	0.908867	1.08674	0.968766	1.12177
A0A0H3C5Y3	MarR/EmrR family transcriptional regulator OS=Caulobacter crescentus (strain NA1000 / CB15N) GN=CCNA_00924 PE=4 SV=1 - [A0A0H3C5Y3_CAUCN]	CCNA_00924	0.94919	1.03625	0.904086	1.18986	1.11754	1.07222	0.908083	0.928901	0.998598	0.895946	1.25355	1.11457	0.977589	1.04989	1.10972	0.946086
A0A0H3C5Y5	GDP-mannose 4,6-dehydratase OS=Caulobacter crescentus (strain NA1000 / CB15N) GN=gmd PE=3 SV=1 - [A0A0H3C5Y5_CAUCN]	gmd	0.956176	0.992171	0.972164	1.03105	1.04215	1.00899	1.16028	1.16069	0.830334	0.913442	1.0783	0.909017	0.999642	0.983555	1.02186	0.96251
A0A0H3C5Y7	Riboflavin-specific deaminase family protein OS=Caulobacter crescentus (strain NA1000 / CB15N) GN=CCNA_00929 PE=4 SV=1 - [A0A0H3C5Y7_CAUCN]	CCNA_00929	0.469588	0.534808	0.376264	0.632332	0.529966	0.579636	3.57235	4.17183	0.543353	0.664188	1.34657	0.818072	0.856303	1.24803	1.09091	1.14402
A0A0H3C5Z1	Toxin protein module HipA OS=Caulobacter crescentus (strain NA1000 / CB15N) GN=CCNA_00482 PE=4 SV=1 - [A0A0H3C5Z1_CAUCN]	CCNA_00482	0.955722	1.03374	0.988203	0.984621	0.93005	1.01869	1.02115	1.02027	1.14439	0.971254	1.03024	1.17826	1.00086	0.967131	0.966555	1.0006
A0A0H3C5Z3	Uncharacterized protein OS=Caulobacter crescentus (strain NA1000 / CB15N) GN=CCNA_00102 PE=4 SV=1 - [A0A0H3C5Z3_CAUCN]	CCNA_00102	0.815019	0.999228	0.839094	1.14856	1.11061	1.12793	0.892373	0.808069	1.17715	1.07695	1.40925	1.09304	1.10433	0.971309	1.01829	0.953864
A0A0H3C5Z4	YjgP/YjgQ family membrane permease OS=Caulobacter crescentus (strain NA1000 / CB15N) GN=CCNA_01213 PE=4 SV=1 - [A0A0H3C5Z4_CAUCN]	CCNA_01213	0.965943	1.012	1.03475	1.03029	0.990498	0.948833	1.0438	1.04477	0.968693	1.04197	1.06662	0.929673	0.999071	0.933506	1.08585	0.8597
A0A0H3C5Z5	Alkaline phosphatase OS=Caulobacter crescentus (strain NA1000 / CB15N) GN=CCNA_00487 PE=4 SV=1 - [A0A0H3C5Z5_CAUCN]	CCNA_00487	1.07031	0.928446	0.953508	0.958431	0.890838	0.965175	0.911313	0.978363	1.0885	1.03503	0.895473	1.05165	0.931466	1.12249	0.993013	1.13039
A0A0H3C5Z6	Uncharacterized protein OS=Caulobacter crescentus (strain NA1000 / CB15N) GN=CCNA_00934 PE=4 SV=1 - [A0A0H3C5Z6_CAUCN]	CCNA_00934	1.0147	1.07785	0.926738	1.15714	1.05905	0.928594	0.910343	1.24658	0.886957	0.92641	1.14037	0.957413	0.730271	1.09492	1.24612	0.878662
A0A0H3C5Z7	Thioredoxin OS=Caulobacter crescentus (strain NA1000 / CB15N) GN=CCNA_00109 PE=4 SV=1 - [A0A0H3C5Z7_CAUCN]	CCNA_00109	0.794546	0.815494	0.820528	1.10039	1.13647	1.14043	0.936711	0.820375	1.36925	1.1239	1.38493	1.21831	1.14181	0.968335	0.96489	1.00357
A0A0H3C5Z9	Transport protein OS=Caulobacter crescentus (strain NA1000 / CB15N) GN=CCNA_00494 PE=4 SV=1 - [A0A0H3C5Z9_CAUCN]	CCNA_00494	1.02384	1.04141	0.97817	0.915605	0.934456	0.908404	1.02282	1.0378	1.05731	1.12309	0.894288	0.941424	0.985566	1.04669	1.00793	1.03845
A0A0H3C600	Sphingosine kinase/diacylglycerol kinase-related protein OS=Caulobacter crescentus (strain NA1000 / CB15N) GN=CCNA_01218 PE=4 SV=1 - [A0A0H3C600_CAUCN]	CCNA_01218	0.942449	0.926946	0.952328	0.96397	1.00681	1.02385	1.01485	0.993795	1.10175	1.00606	1.02284	1.09511	1.02119	0.989626	0.941512	1.0511
A0A0H3C601	MarR-family transcriptional regulator OS=Caulobacter crescentus (strain NA1000 / CB15N) GN=CCNA_00939 PE=4 SV=1 - [A0A0H3C601_CAUCN]	CCNA_00939	1.01448	1.09023	0.9589	0.933059	1.09522	1.04134	1.03413	0.956712	1.0322	0.914178	0.919741	1.12911	1.08092	1.05796	0.896014	1.18074
A0A0H3C602	Glucosyltransferase OS=Caulobacter crescentus (strain NA1000 / CB15N) GN=CCNA_00501 PE=4 SV=1 - [A0A0H3C602_CAUCN]	CCNA_00501	0.953789	0.900376	0.999911	1.09964	1.09186	1.10429	1.00284	1.1185	0.918009	0.955917	1.15292	0.960344	0.896589	0.953874	0.995788	0.957909
A0A0H3C605	Acyl-CoA synthetase OS=Caulobacter crescentus (strain NA1000 / CB15N) GN=CCNA_01223 PE=4 SV=1 - [A0A0H3C605_CAUCN]	CCNA_01223	0.951562	0.990383	0.980492	1.07295	1.00621	1.04286	1.00063	1.02893	0.926062	0.998292	1.12756	0.927647	0.97249	0.970495	1.02885	0.943282
A0A0H3C606	Flagellar hook length determination protein OS=Caulobacter crescentus (strain NA1000 / CB15N) GN=CCNA_00944 PE=4 SV=1 - [A0A0H3C606_CAUCN]	CCNA_00944	1.04041	0.753933	0.69964	1.31569	1.44214	1.20569	0.702793	0.745691	1.36104	0.680909	1.26459	1.99886	0.942471	1.48707	1.09123	1.36274
A0A0H3C607	Cytochrome b OS=Caulobacter crescentus (strain NA1000 / CB15N) GN=CCNA_00506 PE=3 SV=1 - [A0A0H3C607_CAUCN]	CCNA_00506	1.02721	0.954946	1.04748	1.06583	1.03504	1.0429	0.980995	0.977234	0.960815	0.956285	1.0376	1.00474	1.00385	0.980646	1.02199	0.959544
A0A0H3C608	Putative acetyltransferase OS=Caulobacter crescentus (strain NA1000 / CB15N) GN=CCNA_00120 PE=4 SV=1 - [A0A0H3C608_CAUCN]	CCNA_00120	1.02815	1.00569	1.08664	0.957534	1.08317	1.02644	0.958602	0.957139	1.03235	0.90386	0.931315	1.14216	1.00153	0.946177	0.932867	1.01427
A0A0H3C611	Carboxymethylenebutenolidase OS=Caulobacter crescentus (strain NA1000 / CB15N) GN=CCNA_00511 PE=4 SV=1 - [A0A0H3C611_CAUCN]	CCNA_00511	0.944113	0.987556	1.05047	1.05991	0.996474	1.04514	1.05557	0.954733	0.915252	0.961855	1.12265	0.951549	1.10562	0.898757	1.01413	0.886238
A0A0H3C614	Amino acid efflux permease OS=Caulobacter crescentus (strain NA1000 / CB15N) GN=CCNA_00125 PE=4 SV=1 - [A0A0H3C614_CAUCN]	CCNA_00125											#DIV/0!	#DIV/0!	#DIV/0!	#DIV/0!	#DIV/0!	#DIV/0!
A0A0H3C615	Uncharacterized protein OS=Caulobacter crescentus (strain NA1000 / CB15N) GN=CCNA_00519 PE=4 SV=1 - [A0A0H3C615_CAUCN]	CCNA_00519	1.02944	1.02763	0.967297	1.04496	0.94084	0.951694	0.978918	1.01236	1.03094	1.05887	1.01508	0.973628	0.966963	1.06424	1.098	0.969253
A0A0H3C617	AAA-family response regulator flbD OS=Caulobacter crescentus (strain NA1000 / CB15N) GN=flbD PE=4 SV=1 - [A0A0H3C617_CAUCN]	flbD	1.09609	0.951114	0.999086	1.04792	0.996666	0.927724	1.09258	0.923719	0.938083	0.914134	0.956056	1.0262	1.1828	1.09709	1.12956	0.971253
A0A0H3C618	BMFP membrane fusogenic protein OS=Caulobacter crescentus (strain NA1000 / CB15N) GN=CCNA_00526 PE=4 SV=1 - [A0A0H3C618_CAUCN]	CCNA_00526	0.973961	0.995427	0.936495	0.98679	1.00904	0.974368	0.975974	0.896964	1.14122	1.09865	1.01317	1.03875	1.08809	1.04001	1.01275	1.02692
A0A0H3C620	Ketoacyl reductase hetN OS=Caulobacter crescentus (strain NA1000 / CB15N) GN=hetN PE=3 SV=1 - [A0A0H3C620_CAUCN]	hetN	1.00193	1.01198	1.00593	1.09372	1.09312	1.06548	0.900149	0.936816	0.986147	0.87213	1.09162	1.13073	0.96086	0.996022	1.0265	0.970306
A0A0H3C621	Two-component sensor histidine kinase OS=Caulobacter crescentus (strain NA1000 / CB15N) GN=CCNA_01239 PE=4 SV=1 - [A0A0H3C621_CAUCN]	CCNA_01239	0.973067	1.01834	1.04539	0.953784	0.950061	0.997378	1.03122	1.00565	1.02741	1.03543	0.980184	0.992255	1.02543	0.930817	0.956291	0.973361
A0A0H3C624	Heat shock protein 15 OS=Caulobacter crescentus (strain NA1000 / CB15N) GN=CCNA_00693 PE=4 SV=1 - [A0A0H3C624_CAUCN]	CCNA_00693	0.91094	0.9727	0.981852	1.08285	0.961793	1.08653	0.954109	0.979643	1.07144	1.04752	1.18872	1.02283	0.973936	0.927778	0.996619	0.930925
A0A0H3C625	TonB-dependent receptor OS=Caulobacter crescentus (strain NA1000 / CB15N) GN=CCNA_00138 PE=3 SV=1 - [A0A0H3C625_CAUCN]	CCNA_00138	1.025	1.00659	0.987102	0.89007	0.949677	1.00542	0.91999	0.915192	1.11528	1.09952	0.86836	1.01434	1.00524	1.03839	0.885269	1.17297
A0A0H3C629	Acetoacetyl-CoA reductase OS=Caulobacter crescentus (strain NA1000 / CB15N) GN=CCNA_00545 PE=4 SV=1 - [A0A0H3C629_CAUCN]	CCNA_00545	1.14964	1.14533	1.13116	1.11186	1.06519	1.0675	0.753068	0.869133	0.842721	0.816065	0.96714	1.03266	0.866459	1.01634	1.04156	0.975787
A0A0H3C631	Oxygen-independent coproporphyrinogen-III oxidase OS=Caulobacter crescentus (strain NA1000 / CB15N) GN=CCNA_00144 PE=4 SV=1 - [A0A0H3C631_CAUCN]	CCNA_00144	0.869525	0.831369	0.953182	0.963706	1.03054	0.939556	1.01418	0.950167	1.30961	1.17397	1.10831	1.11554	1.06737	0.912234	1.0257	0.889374
A0A0H3C632	TonB-dependent receptor OS=Caulobacter crescentus (strain NA1000 / CB15N) GN=CCNA_00700 PE=4 SV=1 - [A0A0H3C632_CAUCN]	CCNA_00700	1.0657	1.15706	1.01175	1.00746	0.969863	1.0608	0.963233	1.01254	0.887958	0.925704	0.945353	0.959224	0.951301	1.05333	0.94972	1.10909
A0A0H3C636	Cro/CI-family transcriptional regulator OS=Caulobacter crescentus (strain NA1000 / CB15N) GN=CCNA_00149 PE=4 SV=1 - [A0A0H3C636_CAUCN]	CCNA_00149	1.03489	0.934004	1.05281	0.990491	1.05945	0.888873	0.917927	1.0259	1.144	0.981993	0.957093	1.16498	0.894753	0.982986	1.11432	0.882138
A0A0H3C637	Nitrogen regulatory protein P-II OS=Caulobacter crescentus (strain NA1000 / CB15N) GN=glnC PE=3 SV=1 - [A0A0H3C637_CAUCN]	glnC	0.895166	0.963557	0.947406	1.17061	1.14597	1.21994	0.906479	0.846883	1.05915	0.917035	1.3077	1.15497	1.07037	0.94486	0.959561	0.984679
A0A0H3C640	Conserved hypothetical cytosolic protein OS=Caulobacter crescentus (strain NA1000 / CB15N) GN=CCNA_00561 PE=4 SV=1 - [A0A0H3C640_CAUCN]	CCNA_00561	1.07489	0.997143	0.989058	1.13678	0.973757	0.977154	0.97559	1.04447	0.921659	0.965485	1.05758	0.954607	0.934048	1.08678	1.16336	0.934175
A0A0H3C642	Uncharacterized protein OS=Caulobacter crescentus (strain NA1000 / CB15N) GN=CCNA_00712 PE=4 SV=1 - [A0A0H3C642_CAUCN]	CCNA_00712	1.03158	0.993178	0.916203	1.0179	1.04153	1.03813	1.04778	0.921121	1.08597	0.956336	0.986737	1.13555	1.13751	1.12593	0.980505	1.14831
A0A0H3C643	Mannonate dehydratase OS=Caulobacter crescentus (strain NA1000 / CB15N) GN=CCNA_00566 PE=4 SV=1 - [A0A0H3C643_CAUCN]	CCNA_00566	1.04016	0.879153	0.938296	1.02375	1.11049	1.10594	0.95096	1.06547	1.00069	0.976228	0.984228	1.02506	0.89253	1.10856	0.925685	1.19756
A0A0H3C649	TonB-dependent receptor OS=Caulobacter crescentus (strain NA1000 / CB15N) GN=CCNA_00170 PE=4 SV=1 - [A0A0H3C649_CAUCN]	CCNA_00170	1.16974	1.11387	1.09634	0.92927	0.961914	1.03207	0.951459	0.937785	0.992933	0.82619	0.794421	1.20182	1.01458	1.06696	0.900393	1.18499
A0A0H3C651	FAD-linked oxidoreductase OS=Caulobacter crescentus (strain NA1000 / CB15N) GN=CCNA_01277 PE=4 SV=1 - [A0A0H3C651_CAUCN]	CCNA_01277	1.05151	1.19076	1.04548	1.07879	1.00714	1.02473	0.915681	0.822868	0.889135	0.869789	1.02594	1.02224	1.11279	1.00577	1.05275	0.955368
A0A0H3C652	Ribosomal-protein-alanine acetyltransferase OS=Caulobacter crescentus (strain NA1000 / CB15N) GN=CCNA_00727 PE=4 SV=1 - [A0A0H3C652_CAUCN]	CCNA_00727	0.944662	0.957963	1.03857	0.893245	1.00028	1.0271	0.970334	0.995658	1.09311	1.00305	0.945571	1.08979	0.974565	0.909578	0.86968	1.04588
A0A0H3C655	GumN superfamily protein OS=Caulobacter crescentus (strain NA1000 / CB15N) GN=CCNA_00734 PE=4 SV=1 - [A0A0H3C655_CAUCN]	CCNA_00734											#DIV/0!	#DIV/0!	#DIV/0!	#DIV/0!	#DIV/0!	#DIV/0!
A0A0H3C657	Type II secretion pathway protein L OS=Caulobacter crescentus (strain NA1000 / CB15N) GN=CCNA_00180 PE=4 SV=1 - [A0A0H3C657_CAUCN]	CCNA_00180											#DIV/0!	#DIV/0!	#DIV/0!	#DIV/0!	#DIV/0!	#DIV/0!
A0A0H3C659	Riboflavin biosynthesis protein OS=Caulobacter crescentus (strain NA1000 / CB15N) GN=CCNA_00740 PE=3 SV=1 - [A0A0H3C659_CAUCN]	CCNA_00740	0.958906	0.957478	0.937904	0.986942	0.925272	0.961677	0.930782	0.953681	1.23162	1.14581	1.02924	1.07489	0.975989	1.02239	1.02627	0.99622
A0A0H3C662	TonB-dependent receptor OS=Caulobacter crescentus (strain NA1000 / CB15N) GN=CCNA_00185 PE=3 SV=1 - [A0A0H3C662_CAUCN]	CCNA_00185	0.697259	0.760967	0.824703	1.16581	1.16805	1.35046	1.13857	1.02951	1.10259	0.911133	1.67199	1.21014	1.10594	0.845467	0.863268	0.979379
A0A0H3C665	Uncharacterized protein OS=Caulobacter crescentus (strain NA1000 / CB15N) GN=CCNA_00600 PE=4 SV=1 - [A0A0H3C665_CAUCN]	CCNA_00600	1.11873	1.11907	1.1698	0.762241	0.708567	0.792676	1.50218	1.77069	0.839282	0.676809	0.681344	1.24006	0.848358	0.956342	0.961605	0.994526
A0A0H3C666	Acyl-CoA hydrolase OS=Caulobacter crescentus (strain NA1000 / CB15N) GN=CCNA_00190 PE=4 SV=1 - [A0A0H3C666_CAUCN]	CCNA_00190											#DIV/0!	#DIV/0!	#DIV/0!	#DIV/0!	#DIV/0!	#DIV/0!
A0A0H3C669	Conserved hypothetical membrane protein OS=Caulobacter crescentus (strain NA1000 / CB15N) GN=CCNA_00605 PE=4 SV=1 - [A0A0H3C669_CAUCN]	CCNA_00605											#DIV/0!	#DIV/0!	#DIV/0!	#DIV/0!	#DIV/0!	#DIV/0!
A0A0H3C670	FeaR-family transcriptional regulator OS=Caulobacter crescentus (strain NA1000 / CB15N) GN=CCNA_00750 PE=4 SV=1 - [A0A0H3C670_CAUCN]	CCNA_00750	0.967211	0.914314	1.00229	1.15803	1.08325	1.15834	0.985517	0.955456	1.01684	0.822727	1.19729	1.23594	1.03146	0.965005	0.999733	0.965262
A0A0H3C671	50S ribosomal protein L19 OS=Caulobacter crescentus (strain NA1000 / CB15N) GN=rplS PE=3 SV=1 - [A0A0H3C671_CAUCN]	rplS	0.989346	1.02069	1.00735	0.906159	0.939088	0.935277	1.05837	1.10107	1.04275	1.05914	0.915916	0.984529	0.96122	0.982127	0.968866	1.01369
A0A0H3C672	Beta-lactamase OS=Caulobacter crescentus (strain NA1000 / CB15N) GN=CCNA_00611 PE=3 SV=1 - [A0A0H3C672_CAUCN]	CCNA_00611	0.952821	0.981223	1.04678	1.00531	0.933501	0.973424	1.04455	1.03195	1.01417	1.08582	1.05509	0.93402	1.01222	0.910244	1.03276	0.881374
A0A0H3C674	23S rRNA Gm2251 methyltransferase OS=Caulobacter crescentus (strain NA1000 / CB15N) GN=CCNA_01297 PE=3 SV=1 - [A0A0H3C674_CAUCN]	CCNA_01297	1.01786	1.00413	1.00203	1.05392	1.02253	1.0342	0.893416	0.946184	1.03901	0.992462	1.03543	1.0469	0.944231	1.01579	1.01907	0.996786
A0A0H3C676	Lrp-family transcriptional regulator OS=Caulobacter crescentus (strain NA1000 / CB15N) GN=CCNA_00616 PE=4 SV=1 - [A0A0H3C676_CAUCN]	CCNA_00616											#DIV/0!	#DIV/0!	#DIV/0!	#DIV/0!	#DIV/0!	#DIV/0!
A0A0H3C677	DesA-family fatty acid desaturase OS=Caulobacter crescentus (strain NA1000 / CB15N) GN=CCNA_00202 PE=4 SV=1 - [A0A0H3C677_CAUCN]	CCNA_00202	0.890087	0.97239	0.93095	1.01866	1.0121	1.01673	0.939756	0.902913	1.14836	1.08287	1.14444	1.06048	1.0408	0.956107	1.0019	0.954295
A0A0H3C680	Acetyltransferase domain protein OS=Caulobacter crescentus (strain NA1000 / CB15N) GN=CCNA_01302 PE=4 SV=1 - [A0A0H3C680_CAUCN]	CCNA_01302	1.00889	1.01425	1.01209	0.97506	0.965978	0.921744	1.16163	1.01578	0.993248	1.03055	0.966469	0.963799	1.14359	0.99684	1.05784	0.942333
A0A0H3C682	Succinyl-CoA:3-ketoacid-coenzyme A transferase subunit B OS=Caulobacter crescentus (strain NA1000 / CB15N) GN=CCNA_00207 PE=4 SV=1 - [A0A0H3C682_CAUCN]	CCNA_00207	1.11106	1.15556	1.05835	1.01544	0.95753	0.98002	0.788863	0.86779	1.05042	0.943588	0.913938	1.11322	0.909048	1.0498	1.03614	1.01319
A0A0H3C684	ROS/MUCR transcriptional regulator OS=Caulobacter crescentus (strain NA1000 / CB15N) GN=CCNA_00998 PE=4 SV=1 - [A0A0H3C684_CAUCN]	CCNA_00998	0.94311	0.917625	0.954494	1.10056	1.09166	1.13481	1.12703	0.962867	0.943924	0.866426	1.16694	1.08945	1.17049	0.988074	0.969812	1.01883
A0A0H3C685	Cobalamin adenosyltransferase family protein OS=Caulobacter crescentus (strain NA1000 / CB15N) GN=CCNA_00766 PE=4 SV=1 - [A0A0H3C685_CAUCN]	CCNA_00766	0.988288	1.0603	1.01219	0.969195	1.01382	1.05262	0.902124	0.892431	1.11397	0.985192	0.980681	1.13071	1.01086	0.976385	0.920748	1.06043
A0A0H3C686	30S ribosomal protein S14 OS=Caulobacter crescentus (strain NA1000 / CB15N) GN=rpsN PE=3 SV=1 - [A0A0H3C686_CAUCN]	rpsN	1.0322	0.981708	1.00331	0.946772	0.893043	0.929346	1.05467	1.08234	1.11132	1.07501	0.91724	1.03378	0.974438	1.02879	1.01875	1.00986
A0A0H3C688	Flagellar biosynthesis protein FliO OS=Caulobacter crescentus (strain NA1000 / CB15N) GN=fliO PE=4 SV=1 - [A0A0H3C688_CAUCN]	fliO	1.14149	1.18648	1.20869	0.754646	0.863555	0.714854	1.04219	0.982847	1.06717	1.01685	0.661104	1.04949	1.06038	0.944406	1.05566	0.894608
A0A0H3C689	N-carbamoylputrescine amidase OS=Caulobacter crescentus (strain NA1000 / CB15N) GN=CCNA_00212 PE=4 SV=1 - [A0A0H3C689_CAUCN]	CCNA_00212	0.898311	0.996033	0.938245	1.02035	1.02371	1.014	0.94394	1.02044	1.05982	1.07849	1.13586	0.982687	0.92503	0.957437	1.00627	0.951472
A0A0H3C692	Uncharacterized protein OS=Caulobacter crescentus (strain NA1000 / CB15N) GN=CCNA_00636 PE=4 SV=1 - [A0A0H3C692_CAUCN]	CCNA_00636	1.09408	1.0144	1.02009	1.06497	0.991549	1.03064	0.996794	1.05895	0.902434	0.872596	0.973388	1.03419	0.941305	1.07254	1.03331	1.03797
A0A0H3C693	Thiol:disulfide interchange protein DsbD OS=Caulobacter crescentus (strain NA1000 / CB15N) GN=CCNA_00217 PE=4 SV=1 - [A0A0H3C693_CAUCN]	CCNA_00217	0.93608	0.957426	0.945682	1.06691	0.980691	1.01487	0.936952	0.968274	1.06086	1.09044	1.13977	0.972872	0.967652	0.989847	1.05128	0.94156
A0A0H3C694	N-formylglutamate deformylase OS=Caulobacter crescentus (strain NA1000 / CB15N) GN=CCNA_01009 PE=4 SV=1 - [A0A0H3C694_CAUCN]	CCNA_01009	1.03736	0.831124	1.15882	0.973813	0.975646	1.06975	0.910273	0.975275	1.0829	0.969946	0.938739	1.11645	0.93335	0.895189	0.910317	0.983382
A0A0H3C696	DegP/HtrA-family serine protease OS=Caulobacter crescentus (strain NA1000 / CB15N) GN=CCNA_01341 PE=4 SV=1 - [A0A0H3C696_CAUCN]	CCNA_01341	0.875476	0.806188	0.824632	1.0451	1.06001	1.03266	0.949886	0.874347	1.2913	1.13648	1.19375	1.13623	1.0864	1.06166	1.01204	1.04902
A0A0H3C698	TonB-dependent receptor protein OS=Caulobacter crescentus (strain NA1000 / CB15N) GN=CCNA_00224 PE=4 SV=1 - [A0A0H3C698_CAUCN]	CCNA_00224	1.02967	0.992722	1.03788	0.878101	0.977671	0.907001	1.23703	1.13477	1.04656	0.954495	0.852795	1.09645	1.09011	0.992099	0.968137	1.02475
A0A0H3C699	Copper resistance protein B OS=Caulobacter crescentus (strain NA1000 / CB15N) GN=CCNA_01016 PE=4 SV=1 - [A0A0H3C699_CAUCN]	CCNA_01016	0.828743	0.82575	0.835364	1.1456	1.13074	1.19848	0.832111	0.856282	1.31234	1.10268	1.38233	1.19015	0.971772	0.992074	0.955873	1.03787
A0A0H3C6A0	Aminobenzoyl-glutamate transport protein OS=Caulobacter crescentus (strain NA1000 / CB15N) GN=CCNA_00782 PE=4 SV=1 - [A0A0H3C6A0_CAUCN]	CCNA_00782	0.989338	0.972182	1.10205	0.978919	0.862538	0.877172	0.971523	1.00259	1.0512	1.19843	0.989469	0.877147	0.969012	0.897726	1.11599	0.804418
A0A0H3C6A3	Pseudouridine synthase OS=Caulobacter crescentus (strain NA1000 / CB15N) GN=CCNA_00230 PE=3 SV=1 - [A0A0H3C6A3_CAUCN]	CCNA_00230	1.03044	0.952709	1.00716	0.940349	0.977366	0.941449	1.00634	1.07553	1.02191	1.08171	0.912568	0.944723	0.935676	1.02311	0.998832	1.02431
A0A0H3C6A4	TonB-dependent receptor OS=Caulobacter crescentus (strain NA1000 / CB15N) GN=CCNA_01021 PE=4 SV=1 - [A0A0H3C6A4_CAUCN]	CCNA_01021	0.98727	1.04023	1.00827	0.760072	0.789655	0.705799	2.55213	1.39637	0.712612	0.598712	0.769873	1.19024	1.82769	0.97917	1.0769	0.909252
A0A0H3C6A7	Two-component response regulator protein OS=Caulobacter crescentus (strain NA1000 / CB15N) GN=CCNA_01351 PE=4 SV=1 - [A0A0H3C6A7_CAUCN]	CCNA_01351	0.939108	0.95021	0.869441	1.07017	1.07526	1.06532	0.97597	0.995608	1.1457	0.991544	1.13956	1.15547	0.980276	1.08013	1.00455	1.07524
A0A0H3C6A8	Uncharacterized protein OS=Caulobacter crescentus (strain NA1000 / CB15N) GN=CCNA_01026 PE=4 SV=1 - [A0A0H3C6A8_CAUCN]	CCNA_01026	1.06477	1.00332	1.0038	1.06664	1.00708	1.03099	0.959158	1.03144	0.843391	0.930663	1.00175	0.906226	0.929924	1.06073	1.03457	1.02529
A0A0H3C6A9	Type I restriction-modification system methylation subunit OS=Caulobacter crescentus (strain NA1000 / CB15N) GN=CCNA_00656 PE=4 SV=1 - [A0A0H3C6A9_CAUCN]	CCNA_00656	1.06845	1.065	1.08967	0.94981	0.938397	0.970826	1.00518	1.03865	0.95002	0.933144	0.888963	1.01809	0.967775	0.980522	0.978352	1.00222
A0A0H3C6B3	Transposase OS=Caulobacter crescentus (strain NA1000 / CB15N) GN=CCNA_00661 PE=4 SV=1 - [A0A0H3C6B3_CAUCN]	CCNA_00661	1.11444	1.08454	1.08088	1.00678	0.998772	0.98789	0.990366	0.931408	0.911231	0.883272	0.903394	1.03165	1.0633	1.03106	1.01912	1.01171
A0A0H3C6B4	5-dehydro-2-deoxygluconokinase IolC OS=Caulobacter crescentus (strain NA1000 / CB15N) GN=iolC PE=4 SV=1 - [A0A0H3C6B4_CAUCN]	iolC	1.5865	1.49856	1.44295	0.699983	0.783138	0.671926	0.682242	0.680953	0.87114	0.689337	0.441211	1.26374	1.00189	1.09948	1.04176	1.05541
A0A0H3C6B5	PTS system, IIA component OS=Caulobacter crescentus (strain NA1000 / CB15N) GN=CCNA_00240 PE=4 SV=1 - [A0A0H3C6B5_CAUCN]	CCNA_00240	1.00577	0.995774	1.02854	0.999497	0.970237	1.07735	0.952054	1.00856	0.973548	0.981318	0.99376	0.992082	0.943972	0.977869	0.927736	1.05404
A0A0H3C6B6	Cytochrome bd-type quinol oxidase, subunit 1 cydA OS=Caulobacter crescentus (strain NA1000 / CB15N) GN=cydA PE=4 SV=1 - [A0A0H3C6B6_CAUCN]	cydA	0.785594	1.28489	1.3361	1.05469	1.39241	1.27145	0.721908	0.642198	0.808767	0.658392	1.34254	1.2284	1.12412	0.587977	0.829516	0.70882
A0A0H3C6B7	Lipopolysaccharide biosynthesis protein OS=Caulobacter crescentus (strain NA1000 / CB15N) GN=CCNA_00667 PE=4 SV=1 - [A0A0H3C6B7_CAUCN]	CCNA_00667	0.89509	1.11364	0.889745	1.10971	1.06209	0.927875	1.04094	0.886476	1.10412	1.00276	1.23977	1.10109	1.17425	1.00601	1.19597	0.841167
A0A0H3C6B8	M14 peptidase-family protein OS=Caulobacter crescentus (strain NA1000 / CB15N) GN=CCNA_01036 PE=4 SV=1 - [A0A0H3C6B8_CAUCN]	CCNA_01036	1.10419	1.14564	1.11095	0.924218	0.91721	0.934213	0.959082	1.06041	0.863986	0.976149	0.837011	0.885096	0.90444	0.993914	0.989301	1.00466
A0A0H3C6B9	Two-component receiver protein SpdR OS=Caulobacter crescentus (strain NA1000 / CB15N) GN=spdR PE=4 SV=1 - [A0A0H3C6B9_CAUCN]	spdR	1.08376	1.11271	1.06964	0.965966	0.941743	0.980849	0.970942	0.988412	0.912333	0.926382	0.891308	0.984834	0.982326	1.0132	0.984827	1.02881
A0A0H3C6C0	PepSY superfamily protein OS=Caulobacter crescentus (strain NA1000 / CB15N) GN=CCNA_01361 PE=4 SV=1 - [A0A0H3C6C0_CAUCN]	CCNA_01361	1.05854	1.46229	0.958986	1.01245	0.731619	0.866624	0.898727	1.14514	0.949047	0.942492	0.956465	1.00695	0.784818	1.10381	1.16827	0.94482
A0A0H3C6C3	Quinone oxidoreductase OS=Caulobacter crescentus (strain NA1000 / CB15N) GN=CCNA_00809 PE=4 SV=1 - [A0A0H3C6C3_CAUCN]	CCNA_00809	1.02559	1.06221	1.06111	1.11875	1.0143	1.00864	0.899137	0.941226	0.950554	0.918709	1.09083	1.03466	0.955283	0.966521	1.10917	0.871393
A0A0H3C6C5	Multimodular transpeptidase-transglycosylase PbpX OS=Caulobacter crescentus (strain NA1000 / CB15N) GN=pbpX PE=4 SV=1 - [A0A0H3C6C5_CAUCN]	pbpX	1.04906	0.99874	1.00299	0.967967	0.966042	0.98683	1.02646	1.03044	0.961539	1.03737	0.9227	0.926904	0.996131	1.04594	0.980886	1.06632
A0A0H3C6C6	Uncharacterized protein OS=Caulobacter crescentus (strain NA1000 / CB15N) GN=CCNA_01366 PE=4 SV=1 - [A0A0H3C6C6_CAUCN]	CCNA_01366											#DIV/0!	#DIV/0!	#DIV/0!	#DIV/0!	#DIV/0!	#DIV/0!
A0A0H3C6C7	Peptide methionine sulfoxide reductase MsrA OS=Caulobacter crescentus (strain NA1000 / CB15N) GN=msrA PE=3 SV=1 - [A0A0H3C6C7_CAUCN]	msrA	0.795461	0.765915	0.721909	1.15772	1.11489	1.30705	0.88305	0.762422	1.18715	1.06406	1.4554	1.11568	1.15822	1.10188	0.885746	1.24402
A0A0H3C6D1	Adenosylhomocysteinase OS=Caulobacter crescentus (strain NA1000 / CB15N) GN=ahcY PE=3 SV=1 - [A0A0H3C6D1_CAUCN]	ahcY	1.0984	1.05232	1.07483	1.07383	1.05468	1.04961	1.01818	0.977263	0.857672	0.804045	0.977639	1.0667	1.04187	1.02192	1.02308	0.998866
A0A0H3C6D2	Cytokinin riboside 5'-monophosphate phosphoribohydrolase OS=Caulobacter crescentus (strain NA1000 / CB15N) GN=CCNA_01372 PE=3 SV=1 - [A0A0H3C6D2_CAUCN]	CCNA_01372	0.873759	1.01895	1.02363	1.08417	1.10259	1.14571	0.933089	0.952814	1.03116	0.884268	1.24081	1.16612	0.979298	0.85359	0.946286	0.902042
A0A0H3C6D5	Methyltransferase OS=Caulobacter crescentus (strain NA1000 / CB15N) GN=CCNA_01056 PE=4 SV=1 - [A0A0H3C6D5_CAUCN]	CCNA_01056	1.01172	1.03296	0.994803	1.01397	1.03301	1.03649	1.03024	0.996331	0.983115	0.92651	1.00223	1.06109	1.03404	1.017	0.978273	1.03959
A0A0H3C6D7	Uncharacterized protein OS=Caulobacter crescentus (strain NA1000 / CB15N) GN=CCNA_00263 PE=4 SV=1 - [A0A0H3C6D7_CAUCN]	CCNA_00263	0.798574	0.843579	0.944601	1.1323	1.26256	1.26806	0.82024	0.87174	1.1056	0.990252	1.41791	1.11648	0.940924	0.845409	0.892938	0.946772
A0A0H3C6D8	ATP-dependent DNA helicase OS=Caulobacter crescentus (strain NA1000 / CB15N) GN=CCNA_00694 PE=4 SV=1 - [A0A0H3C6D8_CAUCN]	CCNA_00694	0.855664	0.87923	0.899726	1.15119	1.05835	1.02974	0.961343	0.869083	1.18837	0.983793	1.34538	1.20795	1.10616	0.951027	1.11794	0.850696
A0A0H3C6D9	Long-chain-fatty-acid--CoA ligase OS=Caulobacter crescentus (strain NA1000 / CB15N) GN=CCNA_01382 PE=4 SV=1 - [A0A0H3C6D9_CAUCN]	CCNA_01382	1.04254	1.06582	1.07944	0.920662	0.932795	0.874774	0.873049	1.01154	1.11242	1.03626	0.883093	1.07349	0.863088	0.965813	1.05246	0.917674
A0A0H3C6E1	Type I secretion adaptor protein RsaE OS=Caulobacter crescentus (strain NA1000 / CB15N) GN=rsaE PE=4 SV=1 - [A0A0H3C6E1_CAUCN]	rsaE	1.04424	1.00434	1.03901	0.9448	0.958891	0.910767	1.0427	1.04844	1.04109	1.06956	0.904775	0.973377	0.99452	1.00503	1.03737	0.968829
A0A0H3C6E2	DNA polymerase III subunit gamma/tau OS=Caulobacter crescentus (strain NA1000 / CB15N) GN=dnaX PE=4 SV=1 - [A0A0H3C6E2_CAUCN]	dnaX	0.953037	0.923756	0.94068	1.11909	1.0963	1.11001	0.992001	0.945764	0.948144	0.952256	1.17424	0.995681	1.04889	1.01314	1.00818	1.00492
A0A0H3C6E4	tRNA (Uracil-5-)-methyltransferase related protein OS=Caulobacter crescentus (strain NA1000 / CB15N) GN=CCNA_01387 PE=3 SV=1 - [A0A0H3C6E4_CAUCN]	CCNA_01387	1.0122	0.982182	0.983498	1.01046	1.03987	0.995951	1.0476	0.990137	1.01891	1.03341	0.998282	0.985973	1.05803	1.02918	1.01457	1.01441
A0A0H3C6E5	Alpha-glucosidase OS=Caulobacter crescentus (strain NA1000 / CB15N) GN=CCNA_00831 PE=3 SV=1 - [A0A0H3C6E5_CAUCN]	CCNA_00831	1.12221	0.81339	0.976967	0.994954	1.03724	0.824664	0.854731	1.38387	1.02203	1.10009	0.886602	0.929043	0.617637	1.14867	1.2065	0.952069
A0A0H3C6E6	Glycosyltransferase OS=Caulobacter crescentus (strain NA1000 / CB15N) GN=CCNA_01066 PE=4 SV=1 - [A0A0H3C6E6_CAUCN]	CCNA_01066	0.964113	1.01621	1.00716	0.979845	0.994172	0.992147	1.01193	1.03237	1.03769	1.04106	1.01632	0.99676	0.980203	0.957263	0.987601	0.969281
A0A0H3C6E7	Conserved hypothetical membrane protein OS=Caulobacter crescentus (strain NA1000 / CB15N) GN=CCNA_00707 PE=4 SV=1 - [A0A0H3C6E7_CAUCN]	CCNA_00707	1.02515	1.02408	1.0019	0.965342	0.972228	0.958895	1.02359	1.03491	0.989667	1.06833	0.941656	0.926373	0.989061	1.02321	1.00672	1.01638
A0A0H3C6E9	Glycosyltransferase involved in cell wall biogenesis OS=Caulobacter crescentus (strain NA1000 / CB15N) GN=CCNA_01392 PE=4 SV=1 - [A0A0H3C6E9_CAUCN]	CCNA_01392	1.00943	1.00041	1.0691	0.920109	0.972727	0.904122	0.977192	1.00739	1.10056	1.06509	0.911515	1.0333	0.970028	0.94419	1.01768	0.927785
A0A0H3C6F0	Alpha-ketoglutarate permease OS=Caulobacter crescentus (strain NA1000 / CB15N) GN=CCNA_01071 PE=4 SV=1 - [A0A0H3C6F0_CAUCN]	CCNA_01071	0.928812	0.959869	0.937954	1.01215	0.995897	1.03721	1.03447	1.18421	1.02955	1.03608	1.08972	0.993699	0.873553	0.990253	0.975838	1.01477
A0A0H3C6F1	Alpha-L-fucosidase OS=Caulobacter crescentus (strain NA1000 / CB15N) GN=CCNA_00837 PE=4 SV=1 - [A0A0H3C6F1_CAUCN]	CCNA_00837											#DIV/0!	#DIV/0!	#DIV/0!	#DIV/0!	#DIV/0!	#DIV/0!
A0A0H3C6F3	Beta/gamma crystallin family protein OS=Caulobacter crescentus (strain NA1000 / CB15N) GN=CCNA_01076 PE=4 SV=1 - [A0A0H3C6F3_CAUCN]	CCNA_01076	0.862248	0.907732	0.865208	1.15215	1.13431	1.09936	1.07616	1.01684	1.0181	0.961086	1.33622	1.05932	1.05834	0.996578	1.04802	0.950916
A0A0H3C6F6	Peptidyl-prolyl cis-trans isomerase OS=Caulobacter crescentus (strain NA1000 / CB15N) GN=CCNA_01398 PE=3 SV=1 - [A0A0H3C6F6_CAUCN]	CCNA_01398	1.11281	1.2092	1.03355	0.927847	0.998627	0.878667	1.00593	1.04538	0.896396	0.933179	0.833788	0.960584	0.962264	1.07668	1.05597	1.01961
A0A0H3C6G0	Phosphate regulon sensor protein phoR OS=Caulobacter crescentus (strain NA1000 / CB15N) GN=phoR PE=4 SV=1 - [A0A0H3C6G0_CAUCN]	phoR	1.10725	1.09923	1.03686	0.931337	0.948271	0.935307	0.986483	1.00349	1.03065	1.01183	0.841125	1.01859	0.983053	1.06789	0.995755	1.07244
A0A0H3C6G1	Metal-dependent hydrolase OS=Caulobacter crescentus (strain NA1000 / CB15N) GN=CCNA_01406 PE=4 SV=1 - [A0A0H3C6G1_CAUCN]	CCNA_01406	1.13397	1.04747	1.00775	0.874157	0.842258	0.814724	1.1317	1.16032	0.914137	1.03215	0.770885	0.885663	0.975329	1.12525	1.07295	1.04874
A0A0H3C6G2	Leucine-responsive regulatory protein OS=Caulobacter crescentus (strain NA1000 / CB15N) GN=CCNA_00847 PE=4 SV=1 - [A0A0H3C6G2_CAUCN]	CCNA_00847	0.98359	1.13419	1.02817	0.996881	0.966091	0.964432	0.992299	0.912082	1.01788	1.00355	1.01351	1.01428	1.08795	0.956637	1.03365	0.925498
A0A0H3C6G3	Uncharacterized protein OS=Caulobacter crescentus (strain NA1000 / CB15N) GN=CCNA_01087 PE=4 SV=1 - [A0A0H3C6G3_CAUCN]	CCNA_01087	1.03652	1.06297	1.04046	0.868724	0.839692	0.869168	0.961375	0.945403	1.10387	1.15261	0.83812	0.957717	1.01689	0.996212	0.999489	0.996721
A0A0H3C6G4	Beta-barrel assembly machine (BAM) protein BamF OS=Caulobacter crescentus (strain NA1000 / CB15N) GN=bamF PE=4 SV=1 - [A0A0H3C6G4_CAUCN]	bamF	1.00072	1.02344	1.01304	0.954158	0.986894	1.01143	1.04218	1.07024	0.986702	1.0565	0.953475	0.933935	0.973789	0.987837	0.943375	1.04713
A0A0H3C6G7	3-hydroxybutyryl-CoA dehydratase OS=Caulobacter crescentus (strain NA1000 / CB15N) GN=CCNA_00741 PE=4 SV=1 - [A0A0H3C6G7_CAUCN]	CCNA_00741	0.999808	0.961682	0.883767	0.793237	0.808705	0.822962	1.35554	1.39369	0.97759	1.14704	0.79339	0.852274	0.972622	1.1313	0.963881	1.1737
A0A0H3C6G8	Acyl-CoA dehydrogenase, short-chain specific OS=Caulobacter crescentus (strain NA1000 / CB15N) GN=CCNA_01412 PE=3 SV=1 - [A0A0H3C6G8_CAUCN]	CCNA_01412	1.09761	1.08621	1.08581	0.908327	0.949833	0.947236	0.965094	0.964082	1.0005	0.962962	0.827548	1.03898	1.00105	1.01087	0.958924	1.05417
A0A0H3C6G9	TetR family transcriptional regulator OS=Caulobacter crescentus (strain NA1000 / CB15N) GN=CCNA_00852 PE=4 SV=1 - [A0A0H3C6G9_CAUCN]	CCNA_00852	0.949853	0.99346	1.09998	0.996825	0.961421	0.971939	1.07635	0.868838	1.1386	0.947845	1.04945	1.20125	1.23884	0.863522	1.0256	0.841965
A0A0H3C6H0	Acylamino-acid-releasing enzyme OS=Caulobacter crescentus (strain NA1000 / CB15N) GN=CCNA_01100 PE=4 SV=1 - [A0A0H3C6H0_CAUCN]	CCNA_01100	1.18898	1.1284	1.23577	0.866943	0.940017	0.877994	1.04343	1.0574	0.88707	0.874433	0.729151	1.01445	0.986791	0.962136	0.987413	0.974401
A0A0H3C6H2	3-deoxy-D-manno-octulosonic-acid transferase OS=Caulobacter crescentus (strain NA1000 / CB15N) GN=CCNA_00304 PE=4 SV=1 - [A0A0H3C6H2_CAUCN]	CCNA_00304	1.01738	1.01019	0.968335	1.01513	1.02223	1.02168	1.06203	0.973724	1.00839	0.969156	0.997793	1.04049	1.09069	1.05065	0.993588	1.05743
A0A0H3C6H3	Glucose/fructose transport protein OS=Caulobacter crescentus (strain NA1000 / CB15N) GN=CCNA_00857 PE=3 SV=1 - [A0A0H3C6H3_CAUCN]	CCNA_00857	0.948799	0.950527	0.943138	0.953435	0.904936	0.905258	1.11609	1.85075	0.891778	0.935053	1.00489	0.953719	0.603047	1.006	1.05322	0.955169
A0A0H3C6H4	5-aminolevulinate synthase OS=Caulobacter crescentus (strain NA1000 / CB15N) GN=CCNA_01417 PE=3 SV=1 - [A0A0H3C6H4_CAUCN]	CCNA_01417	1.03177	1.03451	0.755774	1.03887	1.12443	0.841427	1.07795	0.978896	1.12348	1.01956	1.00688	1.10192	1.10119	1.36518	1.23465	1.10572
A0A0H3C6H5	Antitoxin protein parD-2 OS=Caulobacter crescentus (strain NA1000 / CB15N) GN=parD-2 PE=4 SV=1 - [A0A0H3C6H5_CAUCN]	parD-2	0.977294	0.963577	0.982794	1.14904	1.23812	1.29255	0.880544	0.740411	0.956529	0.812397	1.17573	1.17742	1.18926	0.994403	0.888965	1.11861
A0A0H3C6H6	Xylonate dehydratase xylD OS=Caulobacter crescentus (strain NA1000 / CB15N) GN=xylD PE=3 SV=1 - [A0A0H3C6H6_CAUCN]	xylD	0.832406	0.82359	0.802414	0.928031	0.849256	0.946319	0.861724	2.56869	0.998857	0.988349	1.11488	1.01063	0.335472	1.03738	0.980675	1.05782
A0A0H3C6H7	Uncharacterized protein OS=Caulobacter crescentus (strain NA1000 / CB15N) GN=CCNA_00309 PE=4 SV=1 - [A0A0H3C6H7_CAUCN]	CCNA_00309	1.01477	1.15266	0.983166	0.975829	0.968623	0.949274	0.981601	0.935631	1.081	1.10522	0.961629	0.978086	1.04913	1.03214	1.02797	1.00405
A0A0H3C6H8	Uncharacterized protein OS=Caulobacter crescentus (strain NA1000 / CB15N) GN=CCNA_01424 PE=4 SV=1 - [A0A0H3C6H8_CAUCN]	CCNA_01424	0.999929	1.05959	1.03024	0.821572	0.849765	0.82341	1.20752	1.3854	0.958255	1.08637	0.82163	0.882071	0.871603	0.970577	0.997768	0.972749
A0A0H3C6H9	DNA modification methyltransferase-related protein OS=Caulobacter crescentus (strain NA1000 / CB15N) GN=CCNA_00869 PE=4 SV=1 - [A0A0H3C6H9_CAUCN]	CCNA_00869	0.936893	0.941289	0.912735	1.14463	1.15059	1.11336	0.988756	0.984683	0.947946	0.945995	1.22173	1.00206	1.00414	1.02647	1.02808	0.99843
A0A0H3C6I3	Uncharacterized protein OS=Caulobacter crescentus (strain NA1000 / CB15N) GN=CCNA_01117 PE=4 SV=1 - [A0A0H3C6I3_CAUCN]	CCNA_01117	0.961912	1.08367	1.07801	0.897919	1.02292	0.969792	1.10108	1.07293	0.952892	0.984184	0.933473	0.968205	1.02624	0.892308	0.925888	0.963732
A0A0H3C6I4	Biotin synthesis protein bioC OS=Caulobacter crescentus (strain NA1000 / CB15N) GN=bioC PE=4 SV=1 - [A0A0H3C6I4_CAUCN]	bioC	0.93914	0.950184	0.960457	0.956459	1.04391	1.04136	1.04333	1.0268	1.10866	1.01266	1.01844	1.0948	1.01611	0.977805	0.91847	1.0646
A0A0H3C6I6	MA superfamily peptidase OS=Caulobacter crescentus (strain NA1000 / CB15N) GN=CCNA_01122 PE=4 SV=1 - [A0A0H3C6I6_CAUCN]	CCNA_01122	1.08022	1.10208	1.11145	0.829449	0.911182	0.864303	1.12871	1.16686	0.921053	1.03387	0.767851	0.890878	0.967309	0.971901	0.959674	1.01274
A0A0H3C6I8	PAS-family sensor histidine kinase OS=Caulobacter crescentus (strain NA1000 / CB15N) GN=CCNA_00879 PE=4 SV=1 - [A0A0H3C6I8_CAUCN]	CCNA_00879	0.952932	1.14069	1.01358	1.02667	0.929001	1.02658	1.01397	1.12719	0.962326	0.927869	1.07738	1.03714	0.899556	0.940168	1.00009	0.940087
A0A0H3C6I9	Conserved hypothetical membrane protein OS=Caulobacter crescentus (strain NA1000 / CB15N) GN=CCNA_00751 PE=4 SV=1 - [A0A0H3C6I9_CAUCN]	CCNA_00751	1.00468	1.06777	1.1049	1.14727	1.06433	1.1021	1.03234	0.845746	0.870958	0.806184	1.14193	1.08035	1.22063	0.909296	1.04098	0.873496
A0A0H3C6J1	Ribosomal-protein-alanine acetyltransferase OS=Caulobacter crescentus (strain NA1000 / CB15N) GN=CCNA_00329 PE=4 SV=1 - [A0A0H3C6J1_CAUCN]	CCNA_00329	1.00792	1.00219	1.02176	1.0729	1.20256	1.13843	0.900472	0.944674	0.881462	0.899015	1.06447	0.980475	0.953209	0.986455	0.942435	1.04671
A0A0H3C6J5	Uncharacterized protein OS=Caulobacter crescentus (strain NA1000 / CB15N) GN=CCNA_01445 PE=4 SV=1 - [A0A0H3C6J5_CAUCN]	CCNA_01445	0.908508	0.967356	1.03609	0.979342	1.00888	1.02556	1.0531	1.04591	1.0629	0.980773	1.07797	1.08374	1.00687	0.876865	0.954936	0.918245
A0A0H3C6J6	Carboxypeptidase S OS=Caulobacter crescentus (strain NA1000 / CB15N) GN=CCNA_00773 PE=4 SV=1 - [A0A0H3C6J6_CAUCN]	CCNA_00773	1.05859	1.07715	1.11823	0.989643	0.998925	0.997702	0.947543	1.0277	0.986485	0.92354	0.934872	1.06816	0.922007	0.946663	0.991922	0.954372
A0A0H3C6J8	GTP-binding protein TypA/BipA OS=Caulobacter crescentus (strain NA1000 / CB15N) GN=CCNA_00778 PE=4 SV=1 - [A0A0H3C6J8_CAUCN]	CCNA_00778	1.00974	0.993429	1.01547	1.00633	1.04324	1.0386	0.991476	1.02134	0.957661	0.968432	0.996619	0.988878	0.970757	0.994361	0.968927	1.02625
A0A0H3C6K3	Secreted protease sapA OS=Caulobacter crescentus (strain NA1000 / CB15N) GN=sapA PE=4 SV=1 - [A0A0H3C6K3_CAUCN]	sapA	1.03853	1.15729	0.993782	0.955763	1.00653	0.972299	0.922244	0.988216	1.07713	0.940919	0.920306	1.14476	0.933242	1.04502	0.982993	1.0631
A0A0H3C6K4	Conserved hypothetical cytosolic protein OS=Caulobacter crescentus (strain NA1000 / CB15N) GN=CCNA_01139 PE=4 SV=1 - [A0A0H3C6K4_CAUCN]	CCNA_01139	1.0597	1.07853	1.06403	0.961065	0.938602	0.950587	0.969603	1.02315	1.00466	0.955968	0.906923	1.05093	0.947664	0.995932	1.01102	0.985074
A0A0H3C6K5	Uncharacterized protein OS=Caulobacter crescentus (strain NA1000 / CB15N) GN=CCNA_00895 PE=4 SV=1 - [A0A0H3C6K5_CAUCN]	CCNA_00895	0.927409	0.904221	0.864979	1.13832	1.10192	1.0414	0.995599	0.917723	1.14508	0.983469	1.22742	1.16433	1.08486	1.07217	1.09307	0.98088
A0A0H3C6K6	Hypoxia transcriptional regulator FixK OS=Caulobacter crescentus (strain NA1000 / CB15N) GN=fixK PE=4 SV=1 - [A0A0H3C6K6_CAUCN]	fixK	0.921338	0.686879	0.647985	0.618276	1.86932	1.49662	0.778303	0.585951	1.47885	0.960075	0.671064	1.54035	1.32827	1.42185	0.413114	3.44179
A0A0H3C6K7	Alpha/beta family hydrolase OS=Caulobacter crescentus (strain NA1000 / CB15N) GN=CCNA_00345 PE=4 SV=1 - [A0A0H3C6K7_CAUCN]	CCNA_00345	1.01908	1.21208	1.03664	1.01555	0.992523	0.897524	1.01164	0.89931	0.923979	0.996094	0.996536	0.927603	1.12491	0.983059	1.1315	0.868811
A0A0H3C6K9	Two-component response regulator FixJ OS=Caulobacter crescentus (strain NA1000 / CB15N) GN=fixJ PE=4 SV=1 - [A0A0H3C6K9_CAUCN]	fixJ	0.974936	1.06039	0.963335	1.10495	1.08526	1.1411	0.862094	0.884311	0.909798	0.903713	1.13335	1.00673	0.974877	1.01204	0.968321	1.04515
A0A0H3C6L2	Uncharacterized protein OS=Caulobacter crescentus (strain NA1000 / CB15N) GN=CCNA_00350 PE=4 SV=1 - [A0A0H3C6L2_CAUCN]	CCNA_00350	1.00583	0.936897	0.964316	1.14256	1.12749	1.10113	1.01995	0.827707	0.985718	0.886646	1.13593	1.11174	1.23226	1.04305	1.03762	1.00524
A0A0H3C6L3	Ribosomal RNA large subunit methyltransferase J OS=Caulobacter crescentus (strain NA1000 / CB15N) GN=rlmJ PE=3 SV=1 - [A0A0H3C6L3_CAUCN]	rlmJ	1.04797	1.07663	0.990298	0.940227	1.00761	0.946269	1.01016	1.08014	0.959168	1.08308	0.897188	0.885594	0.935216	1.05824	0.993615	1.06504
A0A0H3C6L4	Single-stranded-DNA-specific exonuclease recJ OS=Caulobacter crescentus (strain NA1000 / CB15N) GN=recJ PE=4 SV=1 - [A0A0H3C6L4_CAUCN]	recJ	0.967714	1.00078	0.965341	1.04817	1.09332	1.08492	0.987336	1.05773	0.917785	0.811025	1.08314	1.13164	0.933444	1.00246	0.966125	1.03761
A0A0H3C6L6	Acetyl esterase OS=Caulobacter crescentus (strain NA1000 / CB15N) GN=CCNA_00810 PE=4 SV=1 - [A0A0H3C6L6_CAUCN]	CCNA_00810	1.02895	1.03143	0.966962	0.962701	0.961031	1.00267	1.05628	1.07876	1.0064	0.937915	0.935614	1.07302	0.97916	1.06411	0.96014	1.10828
A0A0H3C6L7	Protoporphyrinogen oxidase OS=Caulobacter crescentus (strain NA1000 / CB15N) GN=CCNA_01157 PE=4 SV=1 - [A0A0H3C6L7_CAUCN]	CCNA_01157	0.915493	0.775786	0.864303	1.36296	1.19202	1.11973	1.00514	0.958802	0.937642	0.933357	1.48877	1.00459	1.04833	1.05923	1.21723	0.870196
A0A0H3C6M6	LysR-family transcriptional regulator OS=Caulobacter crescentus (strain NA1000 / CB15N) GN=CCNA_00832 PE=4 SV=1 - [A0A0H3C6M6_CAUCN]	CCNA_00832											#DIV/0!	#DIV/0!	#DIV/0!	#DIV/0!	#DIV/0!	#DIV/0!
A0A0H3C6M7	Phospho-2-dehydro-3-deoxyheptonate aldolase OS=Caulobacter crescentus (strain NA1000 / CB15N) GN=CCNA_01463 PE=3 SV=1 - [A0A0H3C6M7_CAUCN]	CCNA_01463											#DIV/0!	#DIV/0!	#DIV/0!	#DIV/0!	#DIV/0!	#DIV/0!
A0A0H3C6M9	3-ketoacyl-CoA thiolase OS=Caulobacter crescentus (strain NA1000 / CB15N) GN=CCNA_01168 PE=3 SV=1 - [A0A0H3C6M9_CAUCN]	CCNA_01168	0.755621	0.704853	0.762878	0.770208	0.788302	0.780985	0.720247	0.825571	0.986942	2.60287	1.01931	0.379175	0.872423	0.990487	0.986202	1.00435
A0A0H3C6N0	Molybdenum cofactor sulfurase related protein OS=Caulobacter crescentus (strain NA1000 / CB15N) GN=CCNA_00915 PE=4 SV=1 - [A0A0H3C6N0_CAUCN]	CCNA_00915	0.900416	0.943242	0.979357	1.1141	1.20011	1.2319	0.909657	0.995244	0.916682	0.918852	1.23731	0.997638	0.914004	0.919395	0.904373	1.01661
A0A0H3C6N1	Ornithine decarboxylase OS=Caulobacter crescentus (strain NA1000 / CB15N) GN=CCNA_00365 PE=3 SV=1 - [A0A0H3C6N1_CAUCN]	CCNA_00365	1.05528	1.02548	0.758912	0.927865	0.840822	0.786605	1.18142	1.30536	1.11898	1.143	0.879262	0.978984	0.905056	1.39051	1.17958	1.17882
A0A0H3C6N3	Cytochrome cbb3 oxidase, cytochrome c subunit ccoO OS=Caulobacter crescentus (strain NA1000 / CB15N) GN=ccoO PE=4 SV=1 - [A0A0H3C6N3_CAUCN]	ccoO	0.49541	1.13423	1.0299	1.4974	1.75294	1.8711	0.577411	0.512163	0.779721	0.433553	3.02254	1.79844	1.1274	0.481028	0.800275	0.601078
A0A0H3C6N4	Chorismate mutase OS=Caulobacter crescentus (strain NA1000 / CB15N) GN=CCNA_01173 PE=4 SV=1 - [A0A0H3C6N4_CAUCN]	CCNA_01173	0.925275	0.93179	0.934205	1.17478	1.04766	1.10431	1.09192	1.00968	0.948852	0.931583	1.26966	1.01854	1.08145	0.99044	1.06382	0.931026
A0A0H3C6N5	Uncharacterized protein OS=Caulobacter crescentus (strain NA1000 / CB15N) GN=CCNA_00920 PE=4 SV=1 - [A0A0H3C6N5_CAUCN]	CCNA_00920	1.00636	1.01059	1.00524	0.891422	0.926061	0.903824	1.06829	1.07362	1.08581	1.10151	0.885788	0.985742	0.995037	1.00111	0.986278	1.01504
A0A0H3C6N6	ATP synthase subunit b OS=Caulobacter crescentus (strain NA1000 / CB15N) GN=atpF PE=3 SV=1 - [A0A0H3C6N6_CAUCN]	atpF	0.974953	0.993887	0.988619	0.954414	0.985353	1.00484	0.97676	0.994349	1.07138	1.08723	0.978933	0.985417	0.98231	0.986177	0.949816	1.03828
A0A0H3C6N8	Uncharacterized protein OS=Caulobacter crescentus (strain NA1000 / CB15N) GN=CCNA_01178 PE=4 SV=1 - [A0A0H3C6N8_CAUCN]	CCNA_01178	0.985116	0.976278	0.964447	0.854901	0.905184	0.914539	1.24272	1.14424	1.09703	1.07216	0.867817	1.0232	1.08607	1.02143	0.934788	1.09269
A0A0H3C6P0	E1-E2 cation pump ATPase fixI OS=Caulobacter crescentus (strain NA1000 / CB15N) GN=fixI PE=3 SV=1 - [A0A0H3C6P0_CAUCN]	fixI	0.78389	1.01335	0.95635	1.37609	1.28301	1.44118	0.750178	0.735794	0.887166	0.794827	1.75546	1.11617	1.01955	0.819668	0.954838	0.858437
A0A0H3C6P1	Cytokinin riboside 5'-monophosphate phosphoribohydrolase OS=Caulobacter crescentus (strain NA1000 / CB15N) GN=CCNA_00853 PE=3 SV=1 - [A0A0H3C6P1_CAUCN]	CCNA_00853	0.796147	1.04973	0.936401	1.05944	1.11063	1.19196	0.780398	0.889029	1.09952	1.04663	1.33071	1.05053	0.877809	0.85022	0.888825	0.956566
A0A0H3C6P2	Uncharacterized protein OS=Caulobacter crescentus (strain NA1000 / CB15N) GN=CCNA_00375 PE=4 SV=1 - [A0A0H3C6P2_CAUCN]	CCNA_00375	0.960832	0.878642	0.837074	1.2274	1.13897	1.28081	0.898714	0.818257	1.11228	0.851318	1.27743	1.30654	1.09833	1.14785	0.958297	1.1978
A0A0H3C6P3	TonB-dependent receptor OS=Caulobacter crescentus (strain NA1000 / CB15N) GN=CCNA_00858 PE=4 SV=1 - [A0A0H3C6P3_CAUCN]	CCNA_00858	0.938589	0.967248	0.946717	0.925443	0.942045	0.905522	1.13649	1.13673	1.17089	1.01078	0.985994	1.15841	0.999784	0.991415	1.022	0.970073
A0A0H3C6P4	Riboflavin synthase alpha chain OS=Caulobacter crescentus (strain NA1000 / CB15N) GN=CCNA_00930 PE=4 SV=1 - [A0A0H3C6P4_CAUCN]	CCNA_00930	0.743469	0.707177	0.885304	0.773506	0.953079	0.97364	1.88631	1.84193	0.920209	0.843135	1.0404	1.09141	1.0241	0.839789	0.794447	1.05707
A0A0H3C6P5	Zinc dependent phospholipase C/S1-P1 nuclease-family protein OS=Caulobacter crescentus (strain NA1000 / CB15N) GN=CCNA_01183 PE=4 SV=1 - [A0A0H3C6P5_CAUCN]	CCNA_01183	1.00838	0.994062	0.996629	1.05136	1.03942	1.05745	0.983743	1.00654	0.949203	0.955129	1.04263	0.993796	0.977355	1.01179	0.994241	1.01765
A0A0H3C6P6	A/G-specific adenine DNA glycosylase OS=Caulobacter crescentus (strain NA1000 / CB15N) GN=CCNA_00381 PE=4 SV=1 - [A0A0H3C6P6_CAUCN]	CCNA_00381	1.002	0.961886	1.00401	1.00963	1.01569	1.15455	0.97389	0.911013	1.05545	0.954692	1.00761	1.10554	1.06902	0.998	0.874478	1.14125
A0A0H3C6P7	CRP-family transcription regulator OS=Caulobacter crescentus (strain NA1000 / CB15N) GN=CCNA_01478 PE=4 SV=1 - [A0A0H3C6P7_CAUCN]	CCNA_01478	1.04191	1.1714	1.06422	1.05538	0.943761	0.98314	0.984603	0.950869	0.955007	0.869871	1.01292	1.09787	1.03548	0.979038	1.07347	0.912027
A0A0H3C6P8	Xylonolactonase xylC OS=Caulobacter crescentus (strain NA1000 / CB15N) GN=xylC PE=4 SV=1 - [A0A0H3C6P8_CAUCN]	xylC	1.03167	1.03193	1.06356	1.0144	1.00377	0.984485	0.940575	1.09645	0.886097	0.960254	0.983262	0.922773	0.857838	0.970017	1.03039	0.941411
A0A0H3C6Q0	FecR family protein OS=Caulobacter crescentus (strain NA1000 / CB15N) GN=CCNA_01188 PE=4 SV=1 - [A0A0H3C6Q0_CAUCN]	CCNA_01188	0.949291	1.18129	0.989187	1.08594	1.01372	0.941576	0.973637	0.98242	0.947943	1.00151	1.14395	0.946515	0.99106	0.959667	1.15332	0.832092
A0A0H3C6Q1	Uncharacterized protein OS=Caulobacter crescentus (strain NA1000 / CB15N) GN=CCNA_00870 PE=4 SV=1 - [A0A0H3C6Q1_CAUCN]	CCNA_00870	0.693996	0.628901	0.62849	1.4016	1.39478	1.5171	0.755365	0.52106	1.49687	0.897952	2.01961	1.66698	1.44967	1.10423	0.923867	1.19522
A0A0H3C6Q2	Esterase lipase Family protein OS=Caulobacter crescentus (strain NA1000 / CB15N) GN=CCNA_00388 PE=4 SV=1 - [A0A0H3C6Q2_CAUCN]	CCNA_00388	1.16745	1.32189	1.16301	0.962766	1.03791	0.999729	0.710757	0.775727	0.907308	0.779248	0.824676	1.16434	0.916246	1.00382	0.963027	1.04235
A0A0H3C6Q6	Amylosucrase OS=Caulobacter crescentus (strain NA1000 / CB15N) GN=CCNA_01193 PE=4 SV=1 - [A0A0H3C6Q6_CAUCN]	CCNA_01193	0.87749	1.00833	0.956286	0.940601	0.965268	1.00937	0.950946	1.14215	1.12082	1.12137	1.07192	0.999515	0.832592	0.917602	0.931867	0.984692
A0A0H3C6Q9	Alpha-L-arabinofuranosidase OS=Caulobacter crescentus (strain NA1000 / CB15N) GN=abfA PE=4 SV=1 - [A0A0H3C6Q9_CAUCN]	abfA	1.10669	1.14182	1.12479	0.852807	0.870606	0.817993	0.921135	1.29157	0.97947	0.951557	0.770589	1.02933	0.71319	0.98391	1.04256	0.943744
A0A0H3C6R0	Uncharacterized protein OS=Caulobacter crescentus (strain NA1000 / CB15N) GN=CCNA_00398 PE=4 SV=1 - [A0A0H3C6R0_CAUCN]	CCNA_00398	1.03972	1.03942	1.02405	1.08837	1.0827	1.10234	0.823491	0.884425	0.952229	0.929774	1.0468	1.02415	0.931104	1.0153	0.987325	1.02834
A0A0H3C6R1	Aspartokinase OS=Caulobacter crescentus (strain NA1000 / CB15N) GN=CCNA_00886 PE=3 SV=1 - [A0A0H3C6R1_CAUCN]	CCNA_00886	0.983966	0.950699	0.9658	0.968218	1.01275	1.015	1.04173	1.02887	1.01526	1.05345	0.983995	0.963747	1.0125	1.01881	0.953912	1.06803
A0A0H3C6R2	dTDP-4-dehydrorhamnose reductase OS=Caulobacter crescentus (strain NA1000 / CB15N) GN=CCNA_01198 PE=4 SV=1 - [A0A0H3C6R2_CAUCN]	CCNA_01198	0.953745	1.10251	0.974152	0.989573	1.00556	0.990171	0.916436	1.03191	1.01219	1.06607	1.03756	0.949464	0.888097	0.979052	0.999395	0.979644
A0A0H3C6R3	Chemotaxis protein MotD OS=Caulobacter crescentus (strain NA1000 / CB15N) GN=CCNA_00945 PE=4 SV=1 - [A0A0H3C6R3_CAUCN]	CCNA_00945	1.05408	0.857851	0.822954	1.17219	1.14247	1.29299	0.913582	0.8674	1.094	0.819899	1.11205	1.33431	1.05324	1.28085	0.906572	1.41285
A0A0H3C6R5	Short chain dehydrogenase OS=Caulobacter crescentus (strain NA1000 / CB15N) GN=CCNA_00403 PE=4 SV=1 - [A0A0H3C6R5_CAUCN]	CCNA_00403											#DIV/0!	#DIV/0!	#DIV/0!	#DIV/0!	#DIV/0!	#DIV/0!
A0A0H3C6R6	Cyclopropane-fatty-acyl-phospholipid synthase OS=Caulobacter crescentus (strain NA1000 / CB15N) GN=CCNA_01494 PE=4 SV=1 - [A0A0H3C6R6_CAUCN]	CCNA_01494	0.925894	0.938873	0.956901	0.930781	0.963494	0.867361	1.24767	1.30531	0.991629	1.11239	1.00528	0.891437	0.955843	0.967596	1.07312	0.901668
A0A0H3C6R7	Flagellar M-ring protein OS=Caulobacter crescentus (strain NA1000 / CB15N) GN=fliF PE=3 SV=1 - [A0A0H3C6R7_CAUCN]	fliF	1.138	1.03367	0.997694	0.935253	0.919443	0.850443	1.00223	1.00022	1.02025	1.02004	0.821841	1.0002	1.00201	1.14063	1.09972	1.03719
A0A0H3C6R8	TonB-dependent receptor OS=Caulobacter crescentus (strain NA1000 / CB15N) GN=CCNA_01203 PE=3 SV=1 - [A0A0H3C6R8_CAUCN]	CCNA_01203	0.996958	1.00758	1.00229	0.891797	0.911207	0.905998	1.00967	1.03465	1.01807	1.08165	0.894518	0.941221	0.975856	0.99468	0.984325	1.01052
A0A0H3C6S1	Alpha/beta hydrolase family protein OS=Caulobacter crescentus (strain NA1000 / CB15N) GN=CCNA_00901 PE=4 SV=1 - [A0A0H3C6S1_CAUCN]	CCNA_00901	1.12598	1.46994	0.986777	1.04778	0.953418	0.841111	0.832056	0.83853	1.02627	0.786806	0.930557	1.30435	0.992279	1.14106	1.24572	0.915991
A0A0H3C6S2	Uncharacterized protein OS=Caulobacter crescentus (strain NA1000 / CB15N) GN=CCNA_01500 PE=4 SV=1 - [A0A0H3C6S2_CAUCN]	CCNA_01500	0.914718	0.841687	1.04348	1.13117	1.15928	1.15138	1.15789	1.01994	0.895023	0.86832	1.23663	1.03075	1.13525	0.876603	0.982444	0.892268
A0A0H3C6S3	Two-component response regulator OS=Caulobacter crescentus (strain NA1000 / CB15N) GN=CCNA_01208 PE=4 SV=1 - [A0A0H3C6S3_CAUCN]	CCNA_01208	1.04932	1.00511	0.994235	1.07194	1.10004	1.1409	0.9438	0.903566	0.948528	0.843973	1.02156	1.12388	1.04453	1.0554	0.939555	1.1233
A0A0H3C6S4	Flagellar biosynthesis protein FlhA OS=Caulobacter crescentus (strain NA1000 / CB15N) GN=flhA PE=4 SV=1 - [A0A0H3C6S4_CAUCN]	flhA	0.958348	1.02189	0.983849	1.0454	1.00829	1.11101	1.03792	0.966742	0.908888	1.0203	1.09083	0.890806	1.07363	0.97408	0.940943	1.03522
A0A0H3C6S5	Uncharacterized protein OS=Caulobacter crescentus (strain NA1000 / CB15N) GN=CCNA_00906 PE=4 SV=1 - [A0A0H3C6S5_CAUCN]	CCNA_00906	0.926315	0.893841	0.918663	1.03107	1.08686	1.15329	0.913879	0.957568	1.11859	1.04812	1.11308	1.06724	0.954375	1.00833	0.894017	1.12786
A0A0H3C6S6	Poly(A) polymerase/tRNA-nucleotidyltransferase OS=Caulobacter crescentus (strain NA1000 / CB15N) GN=CCNA_00413 PE=3 SV=1 - [A0A0H3C6S6_CAUCN]	CCNA_00413	0.980917	1.00968	1.00495	1.03856	0.99854	1.03848	1.01456	1.00066	0.984241	0.991765	1.05876	0.992414	1.01389	0.976088	1.00008	0.976011
A0A0H3C6S8	YjgP/YjgQ family membrane permease OS=Caulobacter crescentus (strain NA1000 / CB15N) GN=CCNA_01214 PE=4 SV=1 - [A0A0H3C6S8_CAUCN]	CCNA_01214	0.971315	0.962734	0.95087	1.0346	0.999157	1.03089	1.01392	1.01529	0.960671	1.0433	1.06515	0.920802	0.998647	1.0215	1.0036	1.01784
A0A0H3C6S9	Uncharacterized protein OS=Caulobacter crescentus (strain NA1000 / CB15N) GN=CCNA_01505 PE=4 SV=1 - [A0A0H3C6S9_CAUCN]	CCNA_01505	0.955738	0.905367	0.912928	1.01789	0.97321	1.11166	0.925383	1.08808	1.07357	1.11865	1.06503	0.959703	0.850477	1.04689	0.915644	1.14334
A0A0H3C6T1	MarR-family transcriptional regulator OS=Caulobacter crescentus (strain NA1000 / CB15N) GN=CCNA_00962 PE=4 SV=1 - [A0A0H3C6T1_CAUCN]	CCNA_00962											#DIV/0!	#DIV/0!	#DIV/0!	#DIV/0!	#DIV/0!	#DIV/0!
A0A0H3C6T2	Putative cytosolic protein OS=Caulobacter crescentus (strain NA1000 / CB15N) GN=CCNA_01219 PE=4 SV=1 - [A0A0H3C6T2_CAUCN]	CCNA_01219											#DIV/0!	#DIV/0!	#DIV/0!	#DIV/0!	#DIV/0!	#DIV/0!
A0A0H3C6T3	Gluconate kinase OS=Caulobacter crescentus (strain NA1000 / CB15N) GN=CCNA_00968 PE=4 SV=1 - [A0A0H3C6T3_CAUCN]	CCNA_00968	0.960575	0.975998	1.00662	1.09075	1.06245	1.09501	0.979445	0.970919	1.02578	0.961772	1.13551	1.06655	1.00878	0.954259	0.996109	0.957987
A0A0H3C6T5	Zinc metalloprotease OS=Caulobacter crescentus (strain NA1000 / CB15N) GN=CCNA_00921 PE=3 SV=1 - [A0A0H3C6T5_CAUCN]	CCNA_00921	1.00631	1.1397	1.02718	0.955984	0.95208	0.917866	0.956951	0.945129	1.06571	1.02576	0.949986	1.03895	1.01251	0.979682	1.04153	0.940619
A0A0H3C6T6	Putative phosphatase OS=Caulobacter crescentus (strain NA1000 / CB15N) GN=CCNA_00973 PE=4 SV=1 - [A0A0H3C6T6_CAUCN]	CCNA_00973	1.02434	1.07734	1.06414	0.993251	1.00116	1.05042	0.952978	0.929998	0.995785	0.971267	0.969649	1.02524	1.02471	0.962596	0.945576	1.018
A0A0H3C6T7	O-antigen membrane transport protein OS=Caulobacter crescentus (strain NA1000 / CB15N) GN=CCNA_01224 PE=4 SV=1 - [A0A0H3C6T7_CAUCN]	CCNA_01224	0.966604	1.04803	0.915308	0.995922	1.02387	1.13394	0.995136	1.04697	1.00555	0.977154	1.03033	1.02906	0.950491	1.05604	0.878284	1.20239
A0A0H3C6U0	Putative exported protein OS=Caulobacter crescentus (strain NA1000 / CB15N) GN=CCNA_01521 PE=4 SV=1 - [A0A0H3C6U0_CAUCN]	CCNA_01521	1.0699	1.01142	0.977758	0.92588	1.01593	0.996003	1.01185	1.00208	1.00963	0.974581	0.865385	1.03596	1.00975	1.09424	0.929596	1.17712
A0A0H3C6U1	Flagellin OS=Caulobacter crescentus (strain NA1000 / CB15N) GN=fljL PE=3 SV=1 - [A0A0H3C6U1_CAUCN]	fljL	1.13503	0.895934	0.992175	0.721933	0.731326	0.697754	0.897113	0.953332	1.51134	1.3233	0.636047	1.1421	0.94103	1.14398	1.03465	1.10567
A0A0H3C6U2	GTP cyclohydrolase-2 OS=Caulobacter crescentus (strain NA1000 / CB15N) GN=CCNA_00931 PE=3 SV=1 - [A0A0H3C6U2_CAUCN]	CCNA_00931	0.847199	0.858561	0.857556	0.85284	0.959532	0.847727	1.59847	1.77743	0.94044	0.914741	1.00666	1.02809	0.899316	0.987922	1.00603	0.982
A0A0H3C6U4	Regulatory protein flaY OS=Caulobacter crescentus (strain NA1000 / CB15N) GN=flaY PE=4 SV=1 - [A0A0H3C6U4_CAUCN]	flaY	0.859123	0.625379	0.608094	1.64294	1.33537	1.64344	0.665016	0.468689	1.10143	0.936781	1.91234	1.17576	1.41888	1.41281	0.999697	1.41324
A0A0H3C6U5	tRNA-specific 2-thiouridylase MnmA OS=Caulobacter crescentus (strain NA1000 / CB15N) GN=mnmA PE=3 SV=1 - [A0A0H3C6U5_CAUCN]	mnmA	0.892747	0.913915	0.887109	1.01246	1.0313	1.01726	0.968263	1.00885	1.18425	1.09797	1.1341	1.07858	0.959769	1.00636	0.995285	1.01112
A0A0H3C6U7	Fasciclin domain cell surface protein OS=Caulobacter crescentus (strain NA1000 / CB15N) GN=CCNA_00419 PE=4 SV=1 - [A0A0H3C6U7_CAUCN]	CCNA_00419	0.797447	0.687841	0.685362	0.720884	0.746056	0.758608	1.61383	1.74468	1.23414	1.47776	0.90399	0.835137	0.924998	1.16354	0.950272	1.22443
A0A0H3C6U9	Aldehyde dehydrogenase OS=Caulobacter crescentus (strain NA1000 / CB15N) GN=CCNA_00424 PE=4 SV=1 - [A0A0H3C6U9_CAUCN]	CCNA_00424	0.807338	0.781603	0.799946	1.22645	1.19265	1.1928	0.831529	0.836495	1.25204	1.09673	1.51913	1.14161	0.994063	1.00924	1.02821	0.981547
A0A0H3C6V1	Flagellar motor switch protein FliG OS=Caulobacter crescentus (strain NA1000 / CB15N) GN=fliG PE=3 SV=1 - [A0A0H3C6V1_CAUCN]	fliG	0.952551	1.09827	0.960509	0.938539	0.912118	0.900066	0.945125	0.961781	1.06994	1.07921	0.98529	0.991412	0.982682	0.991715	1.04274	0.951063
A0A0H3C6V4	AcrR-family transcriptional regulator OS=Caulobacter crescentus (strain NA1000 / CB15N) GN=CCNA_01235 PE=4 SV=1 - [A0A0H3C6V4_CAUCN]	CCNA_01235	1.03257	1.12298	1.09447	0.821435	0.948529	0.854781	1.10314	1.08638	0.945418	1.09148	0.795528	0.866178	1.01543	0.943442	0.960989	0.981741
A0A0H3C6V5	Porin O OS=Caulobacter crescentus (strain NA1000 / CB15N) GN=CCNA_00957 PE=4 SV=1 - [A0A0H3C6V5_CAUCN]	CCNA_00957	1.07733	1.06817	0.997298	0.981647	0.993179	0.897457	0.984583	0.9597	0.99741	1.05062	0.911187	0.949356	1.02593	1.08025	1.09381	0.9876
A0A0H3C6V6	Methyl-accepting chemotaxis protein OS=Caulobacter crescentus (strain NA1000 / CB15N) GN=CCNA_00439 PE=4 SV=1 - [A0A0H3C6V6_CAUCN]	CCNA_00439	1.12046	0.99242	0.943492	1.20354	1.0929	1.03331	0.951368	0.958952	0.889506	0.915656	1.07415	0.971441	0.992091	1.18757	1.16474	1.0196
A0A0H3C6V7	RND family efflux transporter, MFP subunit OS=Caulobacter crescentus (strain NA1000 / CB15N) GN=CCNA_00979 PE=3 SV=1 - [A0A0H3C6V7_CAUCN]	CCNA_00979	1.07295	0.986511	0.907077	0.910432	1.01095	1.05287	1.13076	1.16216	1.0459	0.891936	0.848531	1.17262	0.972984	1.18287	0.864712	1.36793
A0A0H3C6V8	Two-component response regulator OS=Caulobacter crescentus (strain NA1000 / CB15N) GN=CCNA_01240 PE=4 SV=1 - [A0A0H3C6V8_CAUCN]	CCNA_01240	1.00202	0.998346	1.0266	0.986634	0.927562	0.999124	0.926035	0.922946	1.03847	1.06488	0.984641	0.975192	1.00335	0.976065	0.987499	0.988421
A0A0H3C6V9	Organic hydroperoxide resistance protein OS=Caulobacter crescentus (strain NA1000 / CB15N) GN=CCNA_00963 PE=4 SV=1 - [A0A0H3C6V9_CAUCN]	CCNA_00963											#DIV/0!	#DIV/0!	#DIV/0!	#DIV/0!	#DIV/0!	#DIV/0!
A0A0H3C6W0	Chemotaxis protein methyltransferase OS=Caulobacter crescentus (strain NA1000 / CB15N) GN=CCNA_00444 PE=4 SV=1 - [A0A0H3C6W0_CAUCN]	CCNA_00444	1.16854	1.01976	1.09895	1.01882	0.982833	0.995942	0.970571	0.949822	0.884618	0.94698	0.871875	0.934147	1.02185	1.06332	1.02297	1.03944
A0A0H3C6W1	Phosphinothricin N-acetyltransferase OS=Caulobacter crescentus (strain NA1000 / CB15N) GN=CCNA_00984 PE=4 SV=1 - [A0A0H3C6W1_CAUCN]	CCNA_00984	0.916363	0.941653	0.935689	1.0606	1.01698	1.00934	0.934386	1.06392	1.23221	0.958236	1.1574	1.28592	0.878247	0.979346	1.05079	0.932012
A0A0H3C6W2	23S rRNA methyltransferase OS=Caulobacter crescentus (strain NA1000 / CB15N) GN=CCNA_01245 PE=3 SV=1 - [A0A0H3C6W2_CAUCN]	CCNA_01245	1.04036	1.0341	1.0053	0.890066	0.948194	0.922916	1.1319	0.979589	1.00388	1.10071	0.855535	0.912031	1.15549	1.03488	0.964406	1.07308
A0A0H3C6W3	Acyl esterase protein OS=Caulobacter crescentus (strain NA1000 / CB15N) GN=CCNA_00989 PE=4 SV=1 - [A0A0H3C6W3_CAUCN]	CCNA_00989	0.979499	1.08499	1.00656	0.958416	1.08843	0.972554	0.977386	1.03245	1.03954	0.9443	0.978476	1.10085	0.946662	0.973112	0.985463	0.987466
A0A0H3C6W4	CheE protein OS=Caulobacter crescentus (strain NA1000 / CB15N) GN=cheE PE=4 SV=1 - [A0A0H3C6W4_CAUCN]	cheE	1.01498	0.979994	0.967926	0.9763	0.966122	1.032	0.957581	1.11969	0.978998	1.06798	0.961889	0.916678	0.855217	1.04862	0.946027	1.10844
A0A0H3C6W8	N-acetyl-glucosamine/N-acetyl-chitin oligosaccharide outer membrane transporter nagA OS=Caulobacter crescentus (strain NA1000 / CB15N) GN=nagA PE=3 SV=1 - [A0A0H3C6W8_CAUCN]	nagA	1.08816	1.11149	1.05982	0.818854	0.856607	0.84836	0.928537	1.14897	1.07836	1.09187	0.75251	0.98763	0.808147	1.02674	0.965221	1.06374
A0A0H3C6W9	Uncharacterized protein OS=Caulobacter crescentus (strain NA1000 / CB15N) GN=CCNA_01256 PE=4 SV=1 - [A0A0H3C6W9_CAUCN]	CCNA_01256	0.913007	1.19262	0.877745	1.0158	0.919249	0.886432	1.04714	1.14621	1.00164	1.11126	1.11259	0.901356	0.913566	1.04017	1.14594	0.907703
A0A0H3C6X0	OAR protein OS=Caulobacter crescentus (strain NA1000 / CB15N) GN=CCNA_00974 PE=4 SV=1 - [A0A0H3C6X0_CAUCN]	CCNA_00974	1.20582	1.2106	1.18668	0.992165	0.999902	0.994091	0.927623	0.959401	0.7507	0.753337	0.822811	0.9965	0.966877	1.01613	0.998062	1.01811
A0A0H3C6X3	Periplasmic multidrug efflux lipoprotein OS=Caulobacter crescentus (strain NA1000 / CB15N) GN=CCNA_01261 PE=3 SV=1 - [A0A0H3C6X3_CAUCN]	CCNA_01261	0.960578	1.01458	1.00061	1.0061	1.02838	1.01569	1.01317	1.00886	1.02551	0.997656	1.04739	1.02792	1.00427	0.959995	0.990555	0.969149
A0A0H3C6X4	Chaperone protein dnaK OS=Caulobacter crescentus (strain NA1000 / CB15N) GN=CCNA_01543 PE=3 SV=1 - [A0A0H3C6X4_CAUCN]	CCNA_01543	1.00962	1.07332	1.02878	0.907744	0.937666	0.926636	1.079	1.14585	0.976537	1.00464	0.899092	0.972027	0.941653	0.981377	0.979612	1.0018
A0A0H3C6X6	Sulfate adenylyltransferase subunit 2 OS=Caulobacter crescentus (strain NA1000 / CB15N) GN=cysD PE=3 SV=1 - [A0A0H3C6X6_CAUCN]	cysD	0.967947	1.03251	0.979166	0.940677	0.958444	0.942456	1.17477	1.11393	1.02623	1.0826	0.971827	0.947931	1.05461	0.988543	0.998112	0.990412
A0A0H3C6Y1	N-formimino-L-glutamate deiminase OS=Caulobacter crescentus (strain NA1000 / CB15N) GN=CCNA_01012 PE=4 SV=1 - [A0A0H3C6Y1_CAUCN]	CCNA_01012	1.01561	1.04952	1.06835	0.955405	1.06153	0.89388	0.931731	1.05432	1.05634	0.989984	0.940717	1.06703	0.883728	0.950639	1.06883	0.889421
A0A0H3C6Y2	MarR-family transcriptional regulator OS=Caulobacter crescentus (strain NA1000 / CB15N) GN=CCNA_01271 PE=4 SV=1 - [A0A0H3C6Y2_CAUCN]	CCNA_01271	1.01766	0.964536	0.915506	1.00038	0.989972	1.05605	0.999239	1.13039	0.978603	1.05598	0.983015	0.926728	0.883976	1.11159	0.947289	1.17344
A0A0H3C6Y4	Uncharacterized protein OS=Caulobacter crescentus (strain NA1000 / CB15N) GN=CCNA_01278 PE=4 SV=1 - [A0A0H3C6Y4_CAUCN]	CCNA_01278	1.10762	1.08451	1.08532	0.900262	0.994562	0.981898	0.944464	0.8315	0.986874	0.92111	0.812792	1.0714	1.13586	1.02055	0.916859	1.11309
A0A0H3C6Y5	4-hydroxy-2-oxoglutarate aldolase/2-dehydro-3-deoxyphosphogluconate aldolase OS=Caulobacter crescentus (strain NA1000 / CB15N) GN=CCNA_01562 PE=4 SV=1 - [A0A0H3C6Y5_CAUCN]	CCNA_01562	0.957838	0.929968	0.939132	1.13708	1.12693	1.17099	1.05035	0.986481	0.955693	0.923016	1.18714	1.0354	1.06474	1.01992	0.971041	1.05033
A0A0H3C6Y7	Zn-dependent hydrolase, glyoxalase II family OS=Caulobacter crescentus (strain NA1000 / CB15N) GN=CCNA_00483 PE=4 SV=1 - [A0A0H3C6Y7_CAUCN]	CCNA_00483	1.01813	0.974368	1.08492	0.973653	0.960928	0.926062	0.990117	1.00476	0.938333	1.02058	0.956312	0.919415	0.985427	0.93844	1.05139	0.89257
A0A0H3C6Z4	Arsenic resistance protein arsH OS=Caulobacter crescentus (strain NA1000 / CB15N) GN=CCNA_01574 PE=4 SV=1 - [A0A0H3C6Z4_CAUCN]	CCNA_01574	1.07934	0.941907	1.06428	0.741962	0.657857	0.757108	1.14584	1.23186	1.083	1.38291	0.687422	0.78313	0.93017	1.01415	0.979995	1.03485
A0A0H3C6Z5	Putative rhamnosyl transferase OS=Caulobacter crescentus (strain NA1000 / CB15N) GN=CCNA_00497 PE=4 SV=1 - [A0A0H3C6Z5_CAUCN]	CCNA_00497	1.01927	1.01005	0.993746	0.965615	0.94363	0.968081	1.07024	1.00648	1.05956	1.04161	0.947361	1.01723	1.06336	1.02568	0.997454	1.0283
A0A0H3C6Z6	Cell wall degradation protein OS=Caulobacter crescentus (strain NA1000 / CB15N) GN=CCNA_01579 PE=4 SV=1 - [A0A0H3C6Z6_CAUCN]	CCNA_01579	0.992616	1.04568	1.03885	1.03569	1.03008	1.0674	0.98302	0.957636	0.977889	0.950845	1.0434	1.02844	1.02651	0.955496	0.970297	0.984746
A0A0H3C700	Glycosyl transferase family protein OS=Caulobacter crescentus (strain NA1000 / CB15N) GN=CCNA_00502 PE=4 SV=1 - [A0A0H3C700_CAUCN]	CCNA_00502	0.946787	1.09956	0.888512	1.05243	1.02952	1.11081	1.02581	0.881685	1.14302	0.842316	1.11158	1.35699	1.16347	1.06559	0.94744	1.1247
A0A0H3C701	Multimodular transpeptidase-transglycosylase PBP 1A OS=Caulobacter crescentus (strain NA1000 / CB15N) GN=CCNA_01584 PE=4 SV=1 - [A0A0H3C701_CAUCN]	CCNA_01584	1.02597	1.00525	0.994267	0.946251	0.915946	0.99381	1.0394	1.12379	1.00546	0.96703	0.922298	1.03974	0.924903	1.03189	0.952145	1.08375
A0A0H3C702	GntR-family transcriptional regulator OS=Caulobacter crescentus (strain NA1000 / CB15N) GN=CCNA_01037 PE=4 SV=1 - [A0A0H3C702_CAUCN]	CCNA_01037	1.04624	1.05875	1.01891	0.938313	1.0179	0.923965	1.00939	1.02268	1.02072	0.996636	0.896842	1.02416	0.987009	1.02682	1.01553	1.01112
A0A0H3C704	Cytochrome c1 OS=Caulobacter crescentus (strain NA1000 / CB15N) GN=CCNA_00507 PE=4 SV=1 - [A0A0H3C704_CAUCN]	CCNA_00507	1.04986	0.988454	1.0252	0.998454	1.00222	0.989399	0.990811	1.00339	1.00986	0.994418	0.951034	1.01553	0.987467	1.02405	1.00915	1.01477
A0A0H3C705	TonB-dependent receptor OS=Caulobacter crescentus (strain NA1000 / CB15N) GN=CCNA_01042 PE=3 SV=1 - [A0A0H3C705_CAUCN]	CCNA_01042	1.36198	1.33864	1.29246	0.825054	0.838813	0.854451	0.766956	0.886127	0.903896	0.747516	0.605775	1.2092	0.865515	1.05379	0.965596	1.09133
A0A0H3C707	Uncharacterized protein OS=Caulobacter crescentus (strain NA1000 / CB15N) GN=CCNA_01303 PE=4 SV=1 - [A0A0H3C707_CAUCN]	CCNA_01303	0.994078	1.02076	1.04449	0.962624	1.01457	0.987685	1.02177	1.11348	0.988864	0.958631	0.968359	1.03154	0.917633	0.951736	0.974627	0.976513
A0A0H3C709	Ribosome-binding ATPase YchF OS=Caulobacter crescentus (strain NA1000 / CB15N) GN=ychF PE=3 SV=1 - [A0A0H3C709_CAUCN]	ychF	0.963767	0.967828	1.00348	1.04654	1.01403	1.04462	0.976231	1.00024	1.01328	0.991859	1.08588	1.0216	0.975995	0.960423	1.00184	0.958658
A0A0H3C710	Protein translocase subunit SecY OS=Caulobacter crescentus (strain NA1000 / CB15N) GN=secY PE=3 SV=1 - [A0A0H3C710_CAUCN]	secY	1.04028	0.985114	1.03519	1.02897	0.968293	1.0298	0.970696	0.983534	0.972183	1.04414	0.98913	0.931083	0.986947	1.00492	0.999195	1.00573
A0A0H3C712	Antitoxin protein OS=Caulobacter crescentus (strain NA1000 / CB15N) GN=CCNA_00521 PE=4 SV=1 - [A0A0H3C712_CAUCN]	CCNA_00521	1.06882	0.999566	0.906232	1.13104	0.931613	0.983234	1.04845	0.946941	1.06274	0.947842	1.05821	1.12122	1.1072	1.17941	1.15032	1.02528
A0A0H3C715	TonB-dependent receptor OS=Caulobacter crescentus (strain NA1000 / CB15N) GN=CCNA_01047 PE=4 SV=1 - [A0A0H3C715_CAUCN]	CCNA_01047											#DIV/0!	#DIV/0!	#DIV/0!	#DIV/0!	#DIV/0!	#DIV/0!
A0A0H3C716	Uncharacterized protein OS=Caulobacter crescentus (strain NA1000 / CB15N) GN=CCNA_00527 PE=4 SV=1 - [A0A0H3C716_CAUCN]	CCNA_00527	0.882916	0.833987	0.777426	1.12684	1.18854	1.33494	0.936075	0.991606	1.02431	1.02922	1.27627	0.995233	0.943999	1.13569	0.844114	1.34542
A0A0H3C719	ATPase, AAA family OS=Caulobacter crescentus (strain NA1000 / CB15N) GN=CCNA_01342 PE=4 SV=1 - [A0A0H3C719_CAUCN]	CCNA_01342	0.92065	1.00425	0.997473	1.13848	1.11972	1.2987	0.912406	1.00087	0.810098	0.916603	1.2366	0.883805	0.911613	0.922982	0.876627	1.05288
A0A0H3C720	Uncharacterized protein OS=Caulobacter crescentus (strain NA1000 / CB15N) GN=CCNA_00534 PE=4 SV=1 - [A0A0H3C720_CAUCN]	CCNA_00534	0.910515	0.907317	0.990149	1.20275	1.14951	1.15456	0.918561	0.905649	1.00519	0.893287	1.32095	1.12527	1.01426	0.919574	1.04174	0.882731
A0A0H3C722	Uncharacterized protein OS=Caulobacter crescentus (strain NA1000 / CB15N) GN=CCNA_01057 PE=4 SV=1 - [A0A0H3C722_CAUCN]	CCNA_01057	1.17223	0.871431	0.757378	0.915981	0.732047	0.701583	1.10256	1.24271	1.09565	1.46458	0.781398	0.748094	0.887226	1.54775	1.30559	1.18548
A0A0H3C723	Uncharacterized protein OS=Caulobacter crescentus (strain NA1000 / CB15N) GN=CCNA_01347 PE=4 SV=1 - [A0A0H3C723_CAUCN]	CCNA_01347	1.06137	1.13731	1.05003	0.933442	0.974455	0.872489	0.898409	1.0169	0.973019	1.07752	0.879472	0.903014	0.883475	1.0108	1.06986	0.944796
A0A0H3C724	Protease II PtrB OS=Caulobacter crescentus (strain NA1000 / CB15N) GN=ptrB PE=4 SV=1 - [A0A0H3C724_CAUCN]	ptrB	1.07425	1.05743	1.04601	0.999775	0.983881	0.964359	0.951371	0.950363	0.968651	0.977615	0.930676	0.990831	1.00106	1.02699	1.03673	0.990613
A0A0H3C726	GDP-mannose 4,6-dehydratase OS=Caulobacter crescentus (strain NA1000 / CB15N) GN=gmd PE=3 SV=1 - [A0A0H3C726_CAUCN]	gmd	1.00453	0.956038	0.980014	0.985591	0.973773	0.990641	1.01837	1.01665	1.03879	1.07742	0.981148	0.964146	1.00169	1.02502	0.994902	1.03027
A0A0H3C727	Phosphohydrolase, MutT/nudix family OS=Caulobacter crescentus (strain NA1000 / CB15N) GN=CCNA_01623 PE=3 SV=1 - [A0A0H3C727_CAUCN]	CCNA_01623											#DIV/0!	#DIV/0!	#DIV/0!	#DIV/0!	#DIV/0!	#DIV/0!
A0A0H3C728	Two component sensor histidine kinase OS=Caulobacter crescentus (strain NA1000 / CB15N) GN=CCNA_01352 PE=4 SV=1 - [A0A0H3C728_CAUCN]	CCNA_01352	0.916264	0.989732	1.00179	0.977024	1.02703	1.05755	0.865138	0.933672	1.0841	1.02787	1.06631	1.0547	0.926597	0.91463	0.923859	0.990011
A0A0H3C731	Type I secretion outer membrane protein RsaFa OS=Caulobacter crescentus (strain NA1000 / CB15N) GN=rsaFa PE=4 SV=1 - [A0A0H3C731_CAUCN]	rsaFa	0.981199	1.02174	0.988581	0.905428	0.92725	0.926247	1.03603	1.06192	1.07906	1.06359	0.922778	1.01454	0.975618	0.992532	0.977524	1.01535
A0A0H3C732	Arylamine N-acetyltransferase OS=Caulobacter crescentus (strain NA1000 / CB15N) GN=CCNA_01634 PE=3 SV=1 - [A0A0H3C732_CAUCN]	CCNA_01634	0.983477	0.887739	1.03475	0.898441	1.01535	1.0057	1.06468	1.14621	1.09581	0.996746	0.913535	1.09938	0.928867	0.950451	0.893349	1.06392
A0A0H3C733	Cytochrome P450 CypX OS=Caulobacter crescentus (strain NA1000 / CB15N) GN=CCNA_00995 PE=3 SV=1 - [A0A0H3C733_CAUCN]	CCNA_00995	1.02583	1.09637	1.02582	1.07798	1.04479	1.04003	0.89584	0.851988	0.989886	0.926148	1.05084	1.06882	1.05147	1.00001	1.0365	0.9648
A0A0H3C735	Myo-inositol catabolism protein IolD OS=Caulobacter crescentus (strain NA1000 / CB15N) GN=iolD PE=3 SV=1 - [A0A0H3C735_CAUCN]	iolD	1.42421	1.34984	1.38835	0.86993	0.803397	0.768321	0.643876	0.701295	0.860646	0.753279	0.610818	1.14253	0.918125	1.02583	1.13225	0.906009
A0A0H3C737	Quinone oxidoreductase OS=Caulobacter crescentus (strain NA1000 / CB15N) GN=CCNA_01640 PE=4 SV=1 - [A0A0H3C737_CAUCN]	CCNA_01640	0.930411	0.939594	1.11794	1.03366	0.911828	1.04001	0.91169	0.847326	1.16338	1.05768	1.11098	1.09994	1.07596	0.832256	0.9939	0.837364
A0A0H3C740	Two-component response regulator OS=Caulobacter crescentus (strain NA1000 / CB15N) GN=CCNA_01362 PE=4 SV=1 - [A0A0H3C740_CAUCN]	CCNA_01362	0.999937	0.982422	1.12094	1.03714	0.920695	0.949907	1.15664	0.981836	1.02316	0.910904	1.0372	1.12324	1.17804	0.892053	1.09183	0.817025
A0A0H3C742	Adenosylmethionine-8-amino-7-oxononanoate OS=Caulobacter crescentus (strain NA1000 / CB15N) GN=CCNA_01648 PE=3 SV=1 - [A0A0H3C742_CAUCN]	CCNA_01648	1.00903	0.992959	1.05032	1.05529	1.0305	1.0909	0.963966	1.009	0.938338	0.936537	1.04585	1.00192	0.955369	0.960682	0.967359	0.993098
A0A0H3C744	Dihydroorotate dehydrogenase (quinone) OS=Caulobacter crescentus (strain NA1000 / CB15N) GN=CCNA_00562 PE=3 SV=1 - [A0A0H3C744_CAUCN]	CCNA_00562	0.959288	0.980942	0.990665	1.02459	1.03032	1.01348	1.02276	1.00423	0.967694	1.01407	1.06807	0.954264	1.01845	0.968328	1.01096	0.95783
A0A0H3C745	Nicotinate-nucleotide--dimethylbenzimidazole phosphoribosyltransferase OS=Caulobacter crescentus (strain NA1000 / CB15N) GN=CCNA_01367 PE=4 SV=1 - [A0A0H3C745_CAUCN]	CCNA_01367	0.961425	0.916412	0.90912	0.969708	0.990841	0.976138	1.05	0.963305	1.09147	1.12743	1.00862	0.968103	1.09	1.05753	0.993412	1.06455
A0A0H3C747	Cyclophilin-type peptidylprolyl cis-trans isomerase OS=Caulobacter crescentus (strain NA1000 / CB15N) GN=CCNA_01654 PE=4 SV=1 - [A0A0H3C747_CAUCN]	CCNA_01654	0.969864	1.00416	0.969564	0.915295	0.975994	0.921072	0.988331	1.07459	1.03153	1.17378	0.943736	0.878815	0.919727	1.00031	0.993728	1.00662
A0A0H3C748	Histidine utilization repressor OS=Caulobacter crescentus (strain NA1000 / CB15N) GN=CCNA_01013 PE=4 SV=1 - [A0A0H3C748_CAUCN]	CCNA_01013	1.03101	1.02275	1.01809	0.976653	0.990605	0.995912	0.947161	0.983443	1.00027	0.965737	0.947282	1.03576	0.963107	1.01269	0.980662	1.03266
A0A0H3C750	Uncharacterized protein OS=Caulobacter crescentus (strain NA1000 / CB15N) GN=CCNA_01373 PE=4 SV=1 - [A0A0H3C750_CAUCN]	CCNA_01373	0.969251	0.983732	0.903723	1.04945	1.10741	1.08489	0.987296	0.951979	1.0565	0.95513	1.08274	1.10614	1.0371	1.07251	0.967337	1.10872
A0A0H3C751	UPF0114 protein CCNA_01088 OS=Caulobacter crescentus (strain NA1000 / CB15N) GN=CCNA_01088 PE=3 SV=1 - [A0A0H3C751_CAUCN]	CCNA_01088											#DIV/0!	#DIV/0!	#DIV/0!	#DIV/0!	#DIV/0!	#DIV/0!
A0A0H3C753	D-galactose 1-dehydrogenase OS=Caulobacter crescentus (strain NA1000 / CB15N) GN=CCNA_01018 PE=4 SV=1 - [A0A0H3C753_CAUCN]	CCNA_01018	1.04339	1.08301	1.11939	0.950932	0.934976	0.981242	0.87417	0.941819	1.06905	1.01274	0.911389	1.05561	0.928172	0.9321	0.969111	0.961809
A0A0H3C756	Tryptophan halogenase superfamily protein OS=Caulobacter crescentus (strain NA1000 / CB15N) GN=CCNA_01023 PE=4 SV=1 - [A0A0H3C756_CAUCN]	CCNA_01023	1.26473	1.27708	1.05974	0.788428	0.833239	0.769807	1.68411	1.25373	0.708636	0.673526	0.623397	1.05213	1.34327	1.19343	1.02419	1.16524
A0A0H3C758	Circularly permuted ATP-grasp type 2 protein OS=Caulobacter crescentus (strain NA1000 / CB15N) GN=CCNA_01674 PE=4 SV=1 - [A0A0H3C758_CAUCN]	CCNA_01674	0.967428	0.99889	1.01406	0.971899	1.01653	1.02793	1.0395	1.02342	1.01766	0.966154	1.00462	1.05331	1.01572	0.954018	0.94549	1.00902
A0A0H3C759	Probable cytosol aminopeptidase OS=Caulobacter crescentus (strain NA1000 / CB15N) GN=pepA PE=3 SV=1 - [A0A0H3C759_CAUCN]	pepA	0.772697	0.801964	0.773613	1.10973	1.10934	1.11466	0.886734	0.816571	1.38939	1.18552	1.43617	1.17196	1.08592	0.998815	0.995574	1.00326
A0A0H3C761	N-succinylglutamate 5-semialdehyde dehydrogenase OS=Caulobacter crescentus (strain NA1000 / CB15N) GN=astD PE=3 SV=1 - [A0A0H3C761_CAUCN]	astD	1.01581	1.01635	1.00556	1.03959	1.01293	1.06255	0.983496	0.984263	0.954315	0.951429	1.02342	1.00303	0.99922	1.01019	0.978396	1.0325
A0A0H3C762	FecR family protein OS=Caulobacter crescentus (strain NA1000 / CB15N) GN=CCNA_01033 PE=4 SV=1 - [A0A0H3C762_CAUCN]	CCNA_01033	1.39109	1.1279	1.03596	0.69161	0.77348	0.736351	1.2593	1.48233	0.893293	0.840291	0.497171	1.06308	0.849544	1.3428	0.939239	1.42966
A0A0H3C764	Phenylalanine-4-hydroxylase OS=Caulobacter crescentus (strain NA1000 / CB15N) GN=CCNA_01684 PE=4 SV=1 - [A0A0H3C764_CAUCN]	CCNA_01684	1.01247	1.02376	1.01652	1.03161	1.03408	1.05185	0.999852	0.986912	0.946747	1.02207	1.0189	0.9263	1.01311	0.996022	0.980759	1.01556
A0A0H3C765	Glyoxalase family protein OS=Caulobacter crescentus (strain NA1000 / CB15N) GN=CCNA_01038 PE=4 SV=1 - [A0A0H3C765_CAUCN]	CCNA_01038	0.998621	0.982364	1.09205	1.04863	1.08274	1.1224	0.919406	0.92564	0.948461	0.856658	1.05008	1.10716	0.993265	0.914449	0.934269	0.978786
A0A0H3C766	Uncharacterized protein OS=Caulobacter crescentus (strain NA1000 / CB15N) GN=CCNA_01118 PE=4 SV=1 - [A0A0H3C766_CAUCN]	CCNA_01118	0.974895	1.06767	0.940441	1.05033	0.959171	0.997346	0.949611	1.10177	1.01135	1.02792	1.07737	0.983879	0.8619	1.03664	1.05312	0.984347
A0A0H3C768	Inosine-5'-monophosphate dehydrogenase OS=Caulobacter crescentus (strain NA1000 / CB15N) GN=guaB PE=3 SV=1 - [A0A0H3C768_CAUCN]	guaB	1.02579	0.999137	1.00801	0.942851	0.92931	0.908994	1.06813	1.13491	1.00179	1.03162	0.919142	0.971089	0.941153	1.01765	1.03725	0.981103
A0A0H3C769	Peptide chain release factor 3 OS=Caulobacter crescentus (strain NA1000 / CB15N) GN=prfC PE=3 SV=1 - [A0A0H3C769_CAUCN]	prfC	0.977791	0.929221	0.973968	0.958863	0.956248	0.976845	1.02018	1.04622	1.00708	1.07969	0.980642	0.932751	0.975108	1.00392	0.981592	1.02275
A0A0H3C774	Protein-L-isoaspartate O-methyltransferase OS=Caulobacter crescentus (strain NA1000 / CB15N) GN=CCNA_01378 PE=4 SV=1 - [A0A0H3C774_CAUCN]	CCNA_01378	1.00826	1.03005	1.01297	1.01235	1.00671	1.00986	0.918511	0.96833	1.03451	0.989733	1.00406	1.04524	0.948552	0.995354	1.00247	0.992899
A0A0H3C776	Uncharacterized protein OS=Caulobacter crescentus (strain NA1000 / CB15N) GN=CCNA_01135 PE=4 SV=1 - [A0A0H3C776_CAUCN]	CCNA_01135	0.995472	1.0336	0.963254	0.993731	0.927853	1.05079	0.952688	1.00316	0.978941	1.10515	0.998251	0.885799	0.949691	1.03345	0.945702	1.09278
A0A0H3C777	Helix-turn-helix transcriptional regulator OS=Caulobacter crescentus (strain NA1000 / CB15N) GN=CCNA_01058 PE=4 SV=1 - [A0A0H3C777_CAUCN]	CCNA_01058	1.3779	0.832978	0.872604	1.09462	0.868519	0.735894	1.09506	1.12541	1.03392	0.972179	0.794415	1.06351	0.973032	1.57906	1.48747	1.06158
A0A0H3C779	Uncharacterized protein OS=Caulobacter crescentus (strain NA1000 / CB15N) GN=CCNA_01705 PE=4 SV=1 - [A0A0H3C779_CAUCN]	CCNA_01705	1.02059	0.966605	1.13378	0.924109	0.964083	0.872706	1.21246	1.1682	0.981891	0.929099	0.905468	1.05682	1.03789	0.900163	1.0589	0.850093
A0A0H3C781	UDP-perosamine 4-acetyl transferase OS=Caulobacter crescentus (strain NA1000 / CB15N) GN=perB PE=4 SV=1 - [A0A0H3C781_CAUCN]	perB	0.982405	0.986811	1.00187	0.951661	1.00064	0.967446	1.02201	1.05045	1.06364	1.05508	0.968705	1.00811	0.97293	0.980571	0.983684	0.996836
A0A0H3C782	PAS-containing EAL phosphodiesterase OS=Caulobacter crescentus (strain NA1000 / CB15N) GN=CCNA_01140 PE=4 SV=1 - [A0A0H3C782_CAUCN]	CCNA_01140	1.04822	1.01965	1.05131	0.97835	1.00436	1.04905	0.985079	1.0434	0.928676	0.978345	0.933348	0.949231	0.944106	0.997058	0.932608	1.06911
A0A0H3C783	Family 67 glycosyl hydrolase protein OS=Caulobacter crescentus (strain NA1000 / CB15N) GN=CCNA_00578 PE=4 SV=1 - [A0A0H3C783_CAUCN]	CCNA_00578	1.03531	1.07905	1.12821	0.95821	0.998426	0.921818	1.00655	1.19675	0.903908	0.910296	0.925534	0.992982	0.841066	0.917656	1.03948	0.882803
A0A0H3C785	Acetyltransferase OS=Caulobacter crescentus (strain NA1000 / CB15N) GN=CCNA_01147 PE=4 SV=1 - [A0A0H3C785_CAUCN]	CCNA_01147	0.9004	0.834173	0.864005	1.00421	0.926401	1.1096	0.925881	1.11322	1.18125	1.22228	1.11529	0.966433	0.831717	1.04212	0.905016	1.1515
A0A0H3C787	Glycosyltransferase OS=Caulobacter crescentus (strain NA1000 / CB15N) GN=CCNA_01068 PE=4 SV=1 - [A0A0H3C787_CAUCN]	CCNA_01068	0.96858	0.948623	1.00431	0.962465	1.13109	1.13143	0.8494	0.883258	1.04071	1.09119	0.993687	0.953744	0.961667	0.964425	0.850664	1.13373
A0A0H3C789	GPH-family phosphatase OS=Caulobacter crescentus (strain NA1000 / CB15N) GN=CCNA_01715 PE=4 SV=1 - [A0A0H3C789_CAUCN]	CCNA_01715	1.01023	1.0139	0.955385	1.05855	0.989209	1.079	1.03853	1.01247	0.986288	0.939027	1.04783	1.05033	1.02574	1.0574	0.981049	1.07783
A0A0H3C794	RNA polymerase sigma factor OS=Caulobacter crescentus (strain NA1000 / CB15N) GN=CCNA_01721 PE=3 SV=1 - [A0A0H3C794_CAUCN]	CCNA_01721	1.02603	0.972567	1.06421	0.953761	0.913566	0.946264	1.1162	1.08711	1.03665	0.99078	0.929566	1.0463	1.02676	0.964127	1.00792	0.956548
A0A0H3C798	FecR family protein OS=Caulobacter crescentus (strain NA1000 / CB15N) GN=CCNA_00595 PE=4 SV=1 - [A0A0H3C798_CAUCN]	CCNA_00595	0.961189	0.943464	1.17247	1.05534	0.936148	0.967274	1.03252	1.18014	0.886955	1.00303	1.09795	0.884275	0.874912	0.819797	1.09104	0.751389
A0A0H3C799	O-linked N-acetylglucosamine transferase OS=Caulobacter crescentus (strain NA1000 / CB15N) GN=CCNA_01164 PE=4 SV=1 - [A0A0H3C799_CAUCN]	CCNA_01164	0.987284	1.17532	0.996036	1.07737	1.0073	1.0758	0.995229	0.927376	0.905244	0.868036	1.09124	1.04286	1.07317	0.991214	1.00146	0.989768
A0A0H3C7A0	Methyl-accepting chemotaxis protein OS=Caulobacter crescentus (strain NA1000 / CB15N) GN=CCNA_01727 PE=4 SV=1 - [A0A0H3C7A0_CAUCN]	CCNA_01727	1.01777	0.979068	0.899649	1.07384	1.03447	1.0079	1.03307	1.04093	0.968712	1.00541	1.05509	0.963502	0.992443	1.1313	1.06543	1.06182
A0A0H3C7A1	HATPase superfamily protein OS=Caulobacter crescentus (strain NA1000 / CB15N) GN=CCNA_01083 PE=4 SV=1 - [A0A0H3C7A1_CAUCN]	CCNA_01083	1.09066	0.996792	1.02842	0.882466	0.87791	0.913201	0.872634	0.945578	0.894141	0.968277	0.809111	0.923435	0.922857	1.06053	0.966344	1.09746
A0A0H3C7A4	DNA repair protein RadA OS=Caulobacter crescentus (strain NA1000 / CB15N) GN=radA PE=3 SV=1 - [A0A0H3C7A4_CAUCN]	radA	0.938131	0.931007	0.94758	1.04008	1.04305	1.06798	1.03818	1.15043	0.971423	0.955106	1.10868	1.01708	0.902431	0.990029	0.97388	1.01658
A0A0H3C7A5	Uncharacterized protein OS=Caulobacter crescentus (strain NA1000 / CB15N) GN=CCNA_01089 PE=4 SV=1 - [A0A0H3C7A5_CAUCN]	CCNA_01089	1.02611	1.01848	1.05445	0.911554	0.9393	0.936179	1.06445	1.04124	1.02851	1.18463	0.888359	0.868205	1.02229	0.973122	0.973696	0.99941
A0A0H3C7A6	Phosphoglycerate mutase family protein OS=Caulobacter crescentus (strain NA1000 / CB15N) GN=CCNA_01413 PE=3 SV=1 - [A0A0H3C7A6_CAUCN]	CCNA_01413	1.00027	0.944672	0.964431	0.928813	1.08918	0.981581	1.09205	1.06659	1.06396	0.995945	0.928558	1.0683	1.02386	1.03717	0.946241	1.09609
A0A0H3C7A7	LysR-family transcriptional regulator OS=Caulobacter crescentus (strain NA1000 / CB15N) GN=CCNA_01174 PE=4 SV=1 - [A0A0H3C7A7_CAUCN]	CCNA_01174	0.849004	0.932368	0.95322	1.00858	1.00926	1.05507	0.971882	0.957003	1.1862	1.02145	1.18796	1.16129	1.01555	0.890669	0.955936	0.931724
A0A0H3C7A8	Replicative DNA helicase OS=Caulobacter crescentus (strain NA1000 / CB15N) GN=CCNA_01737 PE=3 SV=1 - [A0A0H3C7A8_CAUCN]	CCNA_01737	0.959073	1.04024	0.949491	1.31641	1.19266	1.21319	0.856913	0.868603	0.847997	0.784686	1.37259	1.08068	0.986543	1.01009	1.08508	0.930888
A0A0H3C7B0	ROS/MUCR transcriptional regulator OS=Caulobacter crescentus (strain NA1000 / CB15N) GN=CCNA_01418 PE=4 SV=1 - [A0A0H3C7B0_CAUCN]	CCNA_01418	0.89116	0.839456	0.822372	1.23253	1.22091	1.25397	1.05403	0.935754	0.952395	0.980982	1.38306	0.97086	1.1264	1.08365	0.982903	1.10249
A0A0H3C7B1	Phosphoadenylyl-sulfate reductase (thioredoxin) OS=Caulobacter crescentus (strain NA1000 / CB15N) GN=cysH PE=3 SV=1 - [A0A0H3C7B1_CAUCN]	cysH	0.913708	1.22662	0.886172	1.01661	0.813603	0.816272	1.21632	1.14779	0.853867	1.16401	1.11262	0.733555	1.0597	1.03107	1.24543	0.827884
A0A0H3C7B2	Thioredoxin peroxidase OS=Caulobacter crescentus (strain NA1000 / CB15N) GN=CCNA_01745 PE=4 SV=1 - [A0A0H3C7B2_CAUCN]	CCNA_01745	1.09123	1.07444	1.01749	0.952042	0.955476	0.930089	0.998492	1.03575	0.962614	1.04905	0.872448	0.917601	0.964026	1.07247	1.0236	1.04774
A0A0H3C7B3	ADP-heptose--LPS heptosyltransferase OS=Caulobacter crescentus (strain NA1000 / CB15N) GN=CCNA_01103 PE=4 SV=1 - [A0A0H3C7B3_CAUCN]	CCNA_01103	0.992438	0.974333	0.982336	1.07257	1.13035	0.997398	1.06011	0.892301	0.989486	0.957994	1.08074	1.03287	1.18806	1.01028	1.07537	0.939476
A0A0H3C7B4	K(+)-insensitive pyrophosphate-energized proton pump OS=Caulobacter crescentus (strain NA1000 / CB15N) GN=hppA PE=3 SV=1 - [A0A0H3C7B4_CAUCN]	hppA	0.995786	1.06563	1.06883	0.887486	0.954917	0.882767	0.978663	1.09871	1.04707	1.09032	0.891242	0.960339	0.890735	0.93166	1.00535	0.926706
A0A0H3C7B5	MutT/nudix family hydrolase OS=Caulobacter crescentus (strain NA1000 / CB15N) GN=CCNA_01184 PE=4 SV=1 - [A0A0H3C7B5_CAUCN]	CCNA_01184	1.02251	0.999663	1.05352	0.981136	0.988167	1.01631	0.890336	0.959202	1.06797	1.00352	0.95954	1.06423	0.928205	0.970562	0.965386	1.00536
A0A0H3C7B6	Aminodeoxychorismate lyase OS=Caulobacter crescentus (strain NA1000 / CB15N) GN=CCNA_01751 PE=4 SV=1 - [A0A0H3C7B6_CAUCN]	CCNA_01751	0.937977	0.980836	1.00427	0.998236	0.978762	0.958135	1.07777	1.13671	1.02353	1.0688	1.06424	0.957639	0.948144	0.933993	1.04185	0.896473
A0A0H3C7B7	Nucleoside-diphosphate-sugar epimerase OS=Caulobacter crescentus (strain NA1000 / CB15N) GN=CCNA_01108 PE=4 SV=1 - [A0A0H3C7B7_CAUCN]	CCNA_01108	1.12578	1.03773	1.0406	1.04755	1.03404	1.03877	0.915536	0.940514	0.909672	0.919184	0.930508	0.989652	0.973441	1.08186	1.00845	1.07279
A0A0H3C7B8	Phosphate acyltransferase OS=Caulobacter crescentus (strain NA1000 / CB15N) GN=plsX PE=3 SV=1 - [A0A0H3C7B8_CAUCN]	plsX	1.05755	1.04415	1.03124	0.917962	0.938175	0.962324	1.06717	1.03818	1.03771	1.02384	0.868009	1.01355	1.02793	1.02552	0.953902	1.07507
A0A0H3C7B9	TonB-dependent receptor OS=Caulobacter crescentus (strain NA1000 / CB15N) GN=CCNA_01189 PE=3 SV=1 - [A0A0H3C7B9_CAUCN]	CCNA_01189	1.00098	0.985756	1.04178	0.969335	0.983033	0.971424	1.04128	1.0394	0.961672	1.08862	0.968384	0.883389	1.00181	0.960834	0.99785	0.962904
A0A0H3C7C1	Cysteine desulfurase subunit SufE OS=Caulobacter crescentus (strain NA1000 / CB15N) GN=sufE PE=4 SV=1 - [A0A0H3C7C1_CAUCN]	sufE											#DIV/0!	#DIV/0!	#DIV/0!	#DIV/0!	#DIV/0!	#DIV/0!
A0A0H3C7C2	dTDP-glucose 4,6-dehydratase OS=Caulobacter crescentus (strain NA1000 / CB15N) GN=CCNA_01439 PE=4 SV=1 - [A0A0H3C7C2_CAUCN]	CCNA_01439	0.953084	0.930129	1.00169	1.09162	0.990897	1.01552	1.00052	1.03012	1.0987	1.03166	1.14536	1.06499	0.971268	0.951474	1.07494	0.885145
A0A0H3C7C3	TonB-dependent receptor OS=Caulobacter crescentus (strain NA1000 / CB15N) GN=CCNA_01194 PE=4 SV=1 - [A0A0H3C7C3_CAUCN]	CCNA_01194	1.00723	1.03127	1.06189	0.955133	0.933495	0.920556	0.908667	1.06919	1.15453	1.02217	0.94828	1.12949	0.849862	0.948521	1.03756	0.914183
A0A0H3C7C4	YjgP/YjgQ family membrane permease OS=Caulobacter crescentus (strain NA1000 / CB15N) GN=CCNA_01761 PE=4 SV=1 - [A0A0H3C7C4_CAUCN]	CCNA_01761	0.930688	0.927819	1.00521	1.03739	1.05377	1.108	1.00226	0.983039	0.959587	1.00738	1.11465	0.952556	1.01955	0.925868	0.93627	0.988889
A0A0H3C7C5	MoxR-like ATPase OS=Caulobacter crescentus (strain NA1000 / CB15N) GN=CCNA_00601 PE=4 SV=1 - [A0A0H3C7C5_CAUCN]	CCNA_00601	1.01977	1.09312	1.06566	0.86691	0.791603	0.73708	1.37387	1.33061	0.76881	0.823092	0.850108	0.93405	1.03251	0.956934	1.17614	0.813621
A0A0H3C7C6	Uncharacterized protein OS=Caulobacter crescentus (strain NA1000 / CB15N) GN=CCNA_01119 PE=4 SV=1 - [A0A0H3C7C6_CAUCN]	CCNA_01119	1.19832	0.797001	0.828134	1.35789	1.07169	0.979128	1.01435	1.01396	0.776929	0.998725	1.13316	0.77792	1.00038	1.44702	1.38684	1.04339
A0A0H3C7C7	Glucose-1-phosphate thymidylyltransferase OS=Caulobacter crescentus (strain NA1000 / CB15N) GN=CCNA_01199 PE=3 SV=1 - [A0A0H3C7C7_CAUCN]	CCNA_01199	1.03708	1.05263	1.04906	0.959003	0.99517	1.01402	0.990934	1.04835	0.982027	1.01409	0.924719	0.968382	0.945229	0.988579	0.945747	1.04529
A0A0H3C7C8	Aminotransferase OS=Caulobacter crescentus (strain NA1000 / CB15N) GN=CCNA_01446 PE=3 SV=1 - [A0A0H3C7C8_CAUCN]	CCNA_01446	0.959245	0.944963	1.03063	0.963588	0.967914	0.961183	1.0705	1.02755	1.01111	1.07967	1.00453	0.9365	1.0418	0.930734	1.0025	0.928411
A0A0H3C7C9	CsgG-related curli protein OS=Caulobacter crescentus (strain NA1000 / CB15N) GN=CCNA_01766 PE=4 SV=1 - [A0A0H3C7C9_CAUCN]	CCNA_01766	1.07359	1.04941	1.16025	0.864395	0.772574	0.76081	1.25607	1.71504	0.854591	0.842995	0.805149	1.01376	0.732384	0.925302	1.13615	0.814418
A0A0H3C7D3	dTDP-glucose 4,6-dehydratase OS=Caulobacter crescentus (strain NA1000 / CB15N) GN=CCNA_01204 PE=4 SV=1 - [A0A0H3C7D3_CAUCN]	CCNA_01204	1.0047	0.914324	0.970506	1.1075	1.10349	1.10787	1.02687	0.989907	0.927769	0.9337	1.10232	0.993649	1.03734	1.03523	0.999663	1.03558
A0A0H3C7D5	Cold shock protein cspD OS=Caulobacter crescentus (strain NA1000 / CB15N) GN=cspD PE=4 SV=1 - [A0A0H3C7D5_CAUCN]	cspD	1.14017	1.07368	1.04475	0.928415	0.987541	1.01072	1.18552	1.11571	0.817053	0.861542	0.814278	0.948361	1.06257	1.09134	0.918566	1.18809
A0A0H3C7D7	Hybrid sensor histidine kinase/receiver domain protein OS=Caulobacter crescentus (strain NA1000 / CB15N) GN=CCNA_01777 PE=4 SV=1 - [A0A0H3C7D7_CAUCN]	CCNA_01777	0.928276	0.888665	1.007	1.01588	1.07269	1.15445	1.01523	0.986083	0.965643	1.04451	1.09437	0.924494	1.02956	0.921825	0.879972	1.04756
A0A0H3C7D9	Nucleotidyltransferase family protein OS=Caulobacter crescentus (strain NA1000 / CB15N) GN=CCNA_01210 PE=4 SV=1 - [A0A0H3C7D9_CAUCN]	CCNA_01210	0.956429	1.00502	0.995743	0.950936	0.960835	0.992013	0.982024	0.994581	1.12635	1.07898	0.994256	1.04391	0.987375	0.960518	0.958592	1.00201
A0A0H3C7E2	Uncharacterized protein OS=Caulobacter crescentus (strain NA1000 / CB15N) GN=CCNA_01464 PE=4 SV=1 - [A0A0H3C7E2_CAUCN]	CCNA_01464	1.28393	1.19528	1.19712	0.848167	0.814634	0.78056	0.983288	1.06892	0.85607	0.95888	0.660602	0.892781	0.919886	1.07251	1.08661	0.987022
A0A0H3C7E3	Polyphosphate kinase OS=Caulobacter crescentus (strain NA1000 / CB15N) GN=ppk1 PE=3 SV=1 - [A0A0H3C7E3_CAUCN]	ppk1	0.934054	0.920166	0.951725	1.23759	1.20744	1.16769	0.894347	0.915887	0.94225	0.888013	1.32496	1.06108	0.976481	0.981433	1.05986	0.926
A0A0H3C7E5	Histidine triad (HIT) hydrolase OS=Caulobacter crescentus (strain NA1000 / CB15N) GN=CCNA_01215 PE=4 SV=1 - [A0A0H3C7E5_CAUCN]	CCNA_01215	1.10064	1.04672	1.08024	0.947608	1.02422	0.987351	0.932204	0.971841	1.10303	0.938198	0.860958	1.17569	0.959214	1.01889	0.959748	1.06163
A0A0H3C7E9	7-keto-8-aminopelargonate synthetase OS=Caulobacter crescentus (strain NA1000 / CB15N) GN=CCNA_01220 PE=3 SV=1 - [A0A0H3C7E9_CAUCN]	CCNA_01220	0.953815	0.947518	0.94365	1.05372	1.05067	1.05961	0.971281	0.9533	1.14984	0.984013	1.10474	1.16852	1.01886	1.01077	0.994436	1.01643
A0A0H3C7F4	Uncharacterized protein OS=Caulobacter crescentus (strain NA1000 / CB15N) GN=CCNA_01154 PE=4 SV=1 - [A0A0H3C7F4_CAUCN]	CCNA_01154	0.972403	0.928517	1.04777	1.19158	1.28234	1.2546	0.809229	0.814129	0.870901	0.852988	1.2254	1.021	0.99398	0.928066	0.94977	0.977148
A0A0H3C7F6	Glycerophosphotransferase-related protein OS=Caulobacter crescentus (strain NA1000 / CB15N) GN=CCNA_01225 PE=4 SV=1 - [A0A0H3C7F6_CAUCN]	CCNA_01225	1.00273	0.953582	0.991277	1.01631	1.07607	1.02343	1.03301	0.94762	0.952358	0.984691	1.01354	0.967164	1.09011	1.01156	0.993046	1.01864
A0A0H3C7F7	Tetratricopeptide repeat family protein OS=Caulobacter crescentus (strain NA1000 / CB15N) GN=CCNA_00637 PE=4 SV=1 - [A0A0H3C7F7_CAUCN]	CCNA_00637	1.0409	1.08183	1.03519	0.926195	0.996352	0.953887	1.08522	1.15684	0.852475	0.902027	0.889798	0.945066	0.938088	1.00552	0.970969	1.03558
A0A0H3C7F8	Transporter, major facilitator superfamily OS=Caulobacter crescentus (strain NA1000 / CB15N) GN=CCNA_01159 PE=4 SV=1 - [A0A0H3C7F8_CAUCN]	CCNA_01159	0.639338	1.30944	0.874748	0.972307	0.743482	0.755611	2.04895	1.62058	0.787715	0.705715	1.5208	1.11619	1.26433	0.730882	1.28678	0.567992
A0A0H3C7F9	Tetratricopeptide repeat family protein OS=Caulobacter crescentus (strain NA1000 / CB15N) GN=CCNA_01479 PE=4 SV=1 - [A0A0H3C7F9_CAUCN]	CCNA_01479	0.923084	1.07996	1.06446	1.08037	1.12571	1.17958	1.00612	0.974412	0.848507	0.807406	1.1704	1.05091	1.03254	0.867188	0.9159	0.946815
A0A0H3C7G1	Arylsulfatase family protein OS=Caulobacter crescentus (strain NA1000 / CB15N) GN=CCNA_01230 PE=4 SV=1 - [A0A0H3C7G1_CAUCN]	CCNA_01230	1.02775	1.16434	1.02515	0.946817	1.04124	1.01048	0.994297	0.900695	0.929589	0.992929	0.921255	0.936208	1.10392	1.00253	0.936996	1.06994
A0A0H3C7G3	FkbM methyltransferase family protein OS=Caulobacter crescentus (strain NA1000 / CB15N) GN=CCNA_01165 PE=4 SV=1 - [A0A0H3C7G3_CAUCN]	CCNA_01165	1.04562	1.0429	1.0598	1.01847	1.01199	1.05417	0.940484	0.972965	0.9242	0.953446	0.974034	0.969326	0.966617	0.986617	0.966131	1.0212
A0A0H3C7G6	Acyl-acyl carrier protein synthetase OS=Caulobacter crescentus (strain NA1000 / CB15N) GN=CCNA_01807 PE=4 SV=1 - [A0A0H3C7G6_CAUCN]	CCNA_01807	1.15892	1.00474	1.1019	0.948841	0.906119	0.944788	0.899852	0.969852	0.98615	1.02356	0.818731	0.963452	0.927824	1.05175	1.00429	1.04725
A0A0H3C7G9	Zn-dependent hydrolase, glyoxalase II family OS=Caulobacter crescentus (strain NA1000 / CB15N) GN=CCNA_01241 PE=4 SV=1 - [A0A0H3C7G9_CAUCN]	CCNA_01241	1.0036	1.00599	1.00261	1.02426	1.02827	1.03632	1.00199	0.961687	1.00559	0.948793	1.02059	1.05986	1.04191	1.00099	0.988363	1.01278
A0A0H3C7H0	FAD-dependent dehydrogenase OS=Caulobacter crescentus (strain NA1000 / CB15N) GN=CCNA_01490 PE=4 SV=1 - [A0A0H3C7H0_CAUCN]	CCNA_01490	0.987159	0.962822	0.944712	1.0068	1.00661	1.01853	1.03288	1.0263	0.965537	1.0719	1.0199	0.900774	1.00641	1.04493	0.988479	1.05711
A0A0H3C7H1	Nitrogen regulation protein ntrB OS=Caulobacter crescentus (strain NA1000 / CB15N) GN=CCNA_01814 PE=4 SV=1 - [A0A0H3C7H1_CAUCN]	CCNA_01814	1.04694	1.10639	0.98939	0.957089	0.902429	0.87698	1.07738	1.13311	0.832219	0.964171	0.914174	0.863145	0.950817	1.05817	1.09135	0.969601
A0A0H3C7H4	Methyltransferase OS=Caulobacter crescentus (strain NA1000 / CB15N) GN=CCNA_01246 PE=3 SV=1 - [A0A0H3C7H4_CAUCN]	CCNA_01246	0.991134	0.980876	1.00557	0.924987	0.982761	0.945858	1.05419	1.13777	1.00873	1.09157	0.933261	0.92411	0.92654	0.98564	0.977934	1.00788
A0A0H3C7H6	GTPase HflX OS=Caulobacter crescentus (strain NA1000 / CB15N) GN=hflX PE=3 SV=1 - [A0A0H3C7H6_CAUCN]	hflX	0.954122	0.937289	0.907298	1.03251	0.93234	0.960401	1.08519	1.09081	1.11339	1.10703	1.08216	1.00575	0.994849	1.05161	1.07508	0.978165
A0A0H3C7H7	Type I restriction-modification system specificity subunit OS=Caulobacter crescentus (strain NA1000 / CB15N) GN=CCNA_00657 PE=4 SV=1 - [A0A0H3C7H7_CAUCN]	CCNA_00657	1.03157	1.15338	1.02679	0.999377	0.989559	0.956802	0.998575	0.993747	0.994068	0.927083	0.968796	1.07225	1.00486	1.00465	1.0445	0.961849
A0A0H3C7H9	Penicillin acylase OS=Caulobacter crescentus (strain NA1000 / CB15N) GN=CCNA_01180 PE=4 SV=1 - [A0A0H3C7H9_CAUCN]	CCNA_01180	1.07374	1.11265	1.08789	1.0019	1.02096	1.00034	1.01322	0.957556	0.877998	0.83092	0.933101	1.05666	1.05813	0.986991	1.00157	0.985447
A0A0H3C7I0	Vitamin B12 receptor OS=Caulobacter crescentus (strain NA1000 / CB15N) GN=CCNA_01826 PE=3 SV=1 - [A0A0H3C7I0_CAUCN]	CCNA_01826	1.05219	1.08453	1.06134	1.01387	1.04679	1.02673	0.987181	1.00297	0.868854	0.902172	0.963576	0.963069	0.984255	0.991382	0.987472	1.00396
A0A0H3C7I5	Tryptophan halogenase superfamily protein OS=Caulobacter crescentus (strain NA1000 / CB15N) GN=CCNA_01831 PE=4 SV=1 - [A0A0H3C7I5_CAUCN]	CCNA_01831	1.09939	1.24444	1.1242	0.916198	0.876964	0.932234	1.03506	1.23259	0.838289	0.844278	0.833371	0.992907	0.839745	0.977931	0.982799	0.995047
A0A0H3C7I6	Cystine transport ATP-binding protein OS=Caulobacter crescentus (strain NA1000 / CB15N) GN=CCNA_01506 PE=4 SV=1 - [A0A0H3C7I6_CAUCN]	CCNA_01506	0.94301	1.24044	0.909897	1.03116	0.978773	1.01666	0.939844	0.944246	0.990426	1.02189	1.09347	0.969207	0.995338	1.03639	1.01426	1.02182
A0A0H3C7I7	Capsular polysaccharide biosynthesis protein OS=Caulobacter crescentus (strain NA1000 / CB15N) GN=CCNA_00668 PE=4 SV=1 - [A0A0H3C7I7_CAUCN]	CCNA_00668	0.943707	0.988818	0.908035	1.07578	1.1053	1.01707	1.00989	0.962493	1.05175	1.0024	1.13995	1.04923	1.04925	1.03929	1.05772	0.982573
A0A0H3C7I8	Cation/multidrug efflux pump, AcrB family OS=Caulobacter crescentus (strain NA1000 / CB15N) GN=acrB3 PE=3 SV=1 - [A0A0H3C7I8_CAUCN]	acrB3	0.924115	0.953255	1.01342	1.03735	1.0339	1.00168	1.00592	0.973929	0.942941	1.01459	1.12254	0.929381	1.03285	0.911879	1.03561	0.880525
A0A0H3C7I9	Uncharacterized protein OS=Caulobacter crescentus (strain NA1000 / CB15N) GN=CCNA_01190 PE=4 SV=1 - [A0A0H3C7I9_CAUCN]	CCNA_01190	0.923047	1.01533	1.02119	0.993483	1.13725	1.14061	0.965852	0.976113	0.965554	1.00167	1.07631	0.963944	0.989488	0.903897	0.871011	1.03776
A0A0H3C7J0	Acyl-CoA thioesterase I/lysophospholipase OS=Caulobacter crescentus (strain NA1000 / CB15N) GN=CCNA_01836 PE=4 SV=1 - [A0A0H3C7J0_CAUCN]	CCNA_01836	0.780327	0.870994	0.909655	1.10824	0.990526	0.99544	1.10318	1.00974	1.28288	1.03642	1.42022	1.2378	1.09254	0.857827	1.11331	0.770519
A0A0H3C7J3	LacI-family transcriptional regulator OS=Caulobacter crescentus (strain NA1000 / CB15N) GN=CCNA_01195 PE=4 SV=1 - [A0A0H3C7J3_CAUCN]	CCNA_01195	0.999111	0.987206	0.936833	1.19558	1.11904	1.16551	0.949646	0.917605	0.918515	0.905099	1.19665	1.01482	1.03492	1.06648	1.0258	1.03965
A0A0H3C7J4	NTF2 superfamily protein OS=Caulobacter crescentus (strain NA1000 / CB15N) GN=CCNA_01267 PE=4 SV=1 - [A0A0H3C7J4_CAUCN]	CCNA_01267											#DIV/0!	#DIV/0!	#DIV/0!	#DIV/0!	#DIV/0!	#DIV/0!
A0A0H3C7J5	Malate synthase OS=Caulobacter crescentus (strain NA1000 / CB15N) GN=CCNA_01843 PE=3 SV=1 - [A0A0H3C7J5_CAUCN]	CCNA_01843	0.652376	2.25353	0.826844	1.21732	0.750677	0.663658	0.862666	0.854307	0.824856	1.01743	1.86599	0.810727	1.00978	0.788995	1.83426	0.430143
A0A0H3C7J6	NAD(P)H:FMN oxidoreductase family protein OS=Caulobacter crescentus (strain NA1000 / CB15N) GN=CCNA_01516 PE=4 SV=1 - [A0A0H3C7J6_CAUCN]	CCNA_01516	1.0053	0.979025	0.957127	1.18883	1.10027	1.19863	0.998784	0.910498	0.883581	0.853429	1.18256	1.03533	1.09696	1.05033	0.991829	1.05898
A0A0H3C7J7	2-hydroxychromene-2-carboxylate isomerase OS=Caulobacter crescentus (strain NA1000 / CB15N) GN=CCNA_00680 PE=4 SV=1 - [A0A0H3C7J7_CAUCN]	CCNA_00680	0.935491	0.989735	0.974458	1.09353	1.09954	1.21398	0.906105	1.02271	0.963725	0.902754	1.16894	1.06754	0.88598	0.960012	0.900783	1.06575
A0A0H3C7K1	ATP-dependent protease subunit OS=Caulobacter crescentus (strain NA1000 / CB15N) GN=CCNA_01522 PE=4 SV=1 - [A0A0H3C7K1_CAUCN]	CCNA_01522	0.929339	0.971163	0.959181	1.07511	1.11078	1.09786	0.845058	0.836919	1.08925	1.05726	1.15686	1.03026	1.00972	0.968888	0.979275	0.989394
A0A0H3C7K4	NAD kinase OS=Caulobacter crescentus (strain NA1000 / CB15N) GN=nadK PE=3 SV=1 - [A0A0H3C7K4_CAUCN]	nadK	1.00445	0.986977	1.05877	1.01896	1.09045	0.959635	0.952197	0.902042	1.09225	0.919317	1.01444	1.18811	1.0556	0.948702	1.06182	0.893469
A0A0H3C7K6	Flagellin OS=Caulobacter crescentus (strain NA1000 / CB15N) GN=fljK PE=3 SV=1 - [A0A0H3C7K6_CAUCN]	fljK	1.17238	0.972197	0.961491	0.57826	0.51607	0.499291	0.737511	0.991133	1.82246	1.43792	0.493237	1.26743	0.74411	1.21933	1.15816	1.05282
A0A0H3C7K7	CarD-family transcriptional regulator OS=Caulobacter crescentus (strain NA1000 / CB15N) GN=CCNA_00690 PE=4 SV=1 - [A0A0H3C7K7_CAUCN]	CCNA_00690	1.03014	0.996498	0.922652	0.969798	1.00474	0.933398	1.14448	1.07598	0.985642	1.00253	0.941423	0.983151	1.06366	1.1165	1.039	1.07459
A0A0H3C7K8	MobA-like NTP transferase domain protein OS=Caulobacter crescentus (strain NA1000 / CB15N) GN=CCNA_01211 PE=4 SV=1 - [A0A0H3C7K8_CAUCN]	CCNA_01211	0.936509	1.17524	1.02389	1.05008	0.952232	0.935942	0.944132	1.11126	0.945437	0.991485	1.12127	0.953556	0.849608	0.914655	1.12195	0.815236
A0A0H3C7L0	AraC-family transcriptional regulator OS=Caulobacter crescentus (strain NA1000 / CB15N) GN=CCNA_01858 PE=4 SV=1 - [A0A0H3C7L0_CAUCN]	CCNA_01858	1.00576	1.10903	1.08485	0.840163	0.847388	0.785798	0.880161	1.08505	1.12914	1.20616	0.835356	0.936149	0.811171	0.92709	1.06918	0.8671
A0A0H3C7L1	Metal-dependent hydrolase OS=Caulobacter crescentus (strain NA1000 / CB15N) GN=CCNA_00695 PE=4 SV=1 - [A0A0H3C7L1_CAUCN]	CCNA_00695	1.06781	1.04168	1.02957	1.02072	1.0257	0.973139	0.900154	0.928495	1.0013	1.00132	0.955893	0.999983	0.969477	1.03714	1.04889	0.988803
A0A0H3C7L2	Phosphohydrolase, Icc family OS=Caulobacter crescentus (strain NA1000 / CB15N) GN=CCNA_01216 PE=4 SV=1 - [A0A0H3C7L2_CAUCN]	CCNA_01216	0.997607	1.09313	1.03215	1.01978	1.05644	1.03966	0.939515	0.978289	0.968205	0.99984	1.02222	0.96836	0.960366	0.966529	0.980875	0.985374
A0A0H3C7L3	Uncharacterized protein OS=Caulobacter crescentus (strain NA1000 / CB15N) GN=CCNA_01533 PE=4 SV=1 - [A0A0H3C7L3_CAUCN]	CCNA_01533	1.07069	1.06116	0.901234	0.973204	0.906384	1.06612	1.02288	1.03974	0.966725	1.03078	0.908951	0.937857	0.983786	1.18803	0.912844	1.30146
A0A0H3C7L7	Acyl carrier protein OS=Caulobacter crescentus (strain NA1000 / CB15N) GN=CCNA_01221 PE=4 SV=1 - [A0A0H3C7L7_CAUCN]	CCNA_01221	0.888818	0.935449	0.948716	1.03062	1.04567	1.05602	0.973153	0.986003	1.21196	1.04671	1.15954	1.15787	0.986967	0.936863	0.975942	0.959958
A0A0H3C7L8	Pyruvate phosphate dikinase OS=Caulobacter crescentus (strain NA1000 / CB15N) GN=CCNA_01538 PE=4 SV=1 - [A0A0H3C7L8_CAUCN]	CCNA_01538	1.08664	1.04671	1.09029	1.06224	1.01388	1.04782	0.74629	0.796946	0.972015	1.03066	0.977546	0.943099	0.936438	0.996653	1.01376	0.983126
A0A0H3C7M1	Cobaltochelatase cobT subunit OS=Caulobacter crescentus (strain NA1000 / CB15N) GN=CCNA_00708 PE=4 SV=1 - [A0A0H3C7M1_CAUCN]	CCNA_00708	0.978847	0.985896	0.963246	1.0785	1.00268	1.05059	1.04636	1.02059	0.990301	0.983608	1.1018	1.0068	1.02525	1.0162	1.02656	0.989902
A0A0H3C7M2	Uncharacterized protein OS=Caulobacter crescentus (strain NA1000 / CB15N) GN=CCNA_01226 PE=4 SV=1 - [A0A0H3C7M2_CAUCN]	CCNA_01226	1.00472	1.03823	0.996664	0.967051	0.995973	1.01225	1.0341	1.01041	0.99684	1.04343	0.962509	0.955354	1.02344	1.00808	0.955344	1.0552
A0A0H3C7M5	Formylglycine-generating sulfatase OS=Caulobacter crescentus (strain NA1000 / CB15N) GN=CCNA_01231 PE=4 SV=1 - [A0A0H3C7M5_CAUCN]	CCNA_01231											#DIV/0!	#DIV/0!	#DIV/0!	#DIV/0!	#DIV/0!	#DIV/0!
A0A0H3C7N3	Amino acid permease OS=Caulobacter crescentus (strain NA1000 / CB15N) GN=CCNA_01242 PE=4 SV=1 - [A0A0H3C7N3_CAUCN]	CCNA_01242	1.0521	1.06968	1.09666	1.04588	0.955163	1.00783	0.937513	1.00451	0.919231	0.873268	0.994086	1.05263	0.933306	0.959371	1.03775	0.92447
A0A0H3C7N4	Uncharacterized protein OS=Caulobacter crescentus (strain NA1000 / CB15N) GN=CCNA_00729 PE=4 SV=1 - [A0A0H3C7N4_CAUCN]	CCNA_00729	1.00514	0.965836	0.935707	1.0984	0.9724	0.958767	1.11313	1.18401	0.851862	1.07388	1.09278	0.793259	0.940129	1.07421	1.14564	0.937648
A0A0H3C7P0	Ribosomal large subunit pseudouridine synthase C OS=Caulobacter crescentus (strain NA1000 / CB15N) GN=CCNA_01343 PE=4 SV=1 - [A0A0H3C7P0_CAUCN]	CCNA_01343	0.996194	0.993783	1.01058	0.918852	0.9645	0.901135	1.06927	1.18555	1.03384	1.06241	0.922363	0.97311	0.901914	0.985768	1.01966	0.966761
A0A0H3C7P1	Soluble lytic murein transglycosylase OS=Caulobacter crescentus (strain NA1000 / CB15N) GN=CCNA_01252 PE=4 SV=1 - [A0A0H3C7P1_CAUCN]	CCNA_01252	1.00959	1.02833	1.02783	1.02257	1.03294	0.992293	1.0321	1.02819	0.968601	0.963527	1.01286	1.00527	1.0038	0.982258	1.03052	0.953171
A0A0H3C7P2	HAD superfamily sugar phosphatase OS=Caulobacter crescentus (strain NA1000 / CB15N) GN=CCNA_00742 PE=4 SV=1 - [A0A0H3C7P2_CAUCN]	CCNA_00742	0.935667	1.01364	0.995129	0.948553	0.942903	0.972031	1.11621	0.978102	1.10094	1.06123	1.01377	1.03741	1.1412	0.940248	0.975846	0.96352
A0A0H3C7P4	Nickel-responsive regulator NikR OS=Caulobacter crescentus (strain NA1000 / CB15N) GN=CCNA_01902 PE=4 SV=1 - [A0A0H3C7P4_CAUCN]	CCNA_01902	1.02176	0.899085	0.931439	0.921833	1.11813	1.05238	1.01148	1.03036	1.11408	0.997825	0.902203	1.11651	0.981676	1.09697	0.875951	1.25232
A0A0H3C7P6	Cyclic-di-GMP phosphodiesterase, flagellum assembly factor TipF OS=Caulobacter crescentus (strain NA1000 / CB15N) GN=tipF PE=4 SV=1 - [A0A0H3C7P6_CAUCN]	tipF	1.00434	1.00079	1.00412	1.02618	0.998517	1.0388	0.950361	0.969593	1.05778	1.00317	1.02175	1.05444	0.980164	1.00021	0.98785	1.01252
A0A0H3C7P7	Myo-inositol-hexaphosphate 3-phosphohydrolase OS=Caulobacter crescentus (strain NA1000 / CB15N) GN=CCNA_01353 PE=4 SV=1 - [A0A0H3C7P7_CAUCN]	CCNA_01353	0.992317	0.986129	1.00971	1.12271	1.12081	1.17244	0.978925	0.901895	0.929398	0.852115	1.1314	1.09069	1.08541	0.982776	0.957583	1.02631
A0A0H3C7P9	NAD(FAD)-utilizing dehydrogenase OS=Caulobacter crescentus (strain NA1000 / CB15N) GN=CCNA_01545 PE=4 SV=1 - [A0A0H3C7P9_CAUCN]	CCNA_01545	0.956875	0.93412	0.973049	1.00064	1.08392	0.997414	1.13134	1.14433	0.947322	0.98522	1.04574	0.961533	0.988649	0.983378	1.00324	0.980206
A0A0H3C7Q0	Pyruvate dehydrogenase E1 component OS=Caulobacter crescentus (strain NA1000 / CB15N) GN=CCNA_01263 PE=4 SV=1 - [A0A0H3C7Q0_CAUCN]	CCNA_01263	1.10524	1.09716	1.11588	0.960102	0.986651	1.05673	0.878299	0.95726	0.941537	0.911863	0.868683	1.03254	0.917513	0.99046	0.908558	1.09014
A0A0H3C7Q1	3-hydroxybutyryl-CoA dehydrogenase OS=Caulobacter crescentus (strain NA1000 / CB15N) GN=CCNA_00752 PE=4 SV=1 - [A0A0H3C7Q1_CAUCN]	CCNA_00752	1.04909	1.06706	1.03442	0.931443	0.950202	0.935124	0.976139	1.00429	0.998856	1.05824	0.887856	0.943881	0.971969	1.01419	0.996064	1.01819
A0A0H3C7Q3	Protein ydhR OS=Caulobacter crescentus (strain NA1000 / CB15N) GN=CCNA_01912 PE=4 SV=1 - [A0A0H3C7Q3_CAUCN]	CCNA_01912	0.938291	0.821757	0.939321	1.09319	1.12068	1.0769	0.957679	0.926497	1.09966	1.02019	1.16509	1.07789	1.03366	0.998903	1.01513	0.984013
A0A0H3C7Q4	Cytochrome c OS=Caulobacter crescentus (strain NA1000 / CB15N) GN=CCNA_01268 PE=4 SV=1 - [A0A0H3C7Q4_CAUCN]	CCNA_01268	1.10381	1.05289	1.05199	1.1369	1.19386	1.13594	1.07202	1.03361	0.650811	0.64064	1.02998	1.01588	1.03716	1.04926	1.00085	1.04837
A0A0H3C7Q5	Myo-inositol catabolism protein IolE OS=Caulobacter crescentus (strain NA1000 / CB15N) GN=iolE PE=4 SV=1 - [A0A0H3C7Q5_CAUCN]	iolE	1.41042	1.35336	1.42972	0.828532	0.847803	0.785821	0.73429	0.659394	0.843603	0.731756	0.587437	1.15285	1.11358	0.986501	1.05435	0.935647
A0A0H3C7Q6	Lysyl-tRNA synthetase OS=Caulobacter crescentus (strain NA1000 / CB15N) GN=CCNA_00757 PE=3 SV=1 - [A0A0H3C7Q6_CAUCN]	CCNA_00757	0.996131	1.05327	0.952573	0.913823	1.13421	1.0258	1.12498	0.836102	1.09841	0.926742	0.917372	1.18524	1.34551	1.04573	0.89084	1.17387
A0A0H3C7Q7	LacI-family transcriptional regulator OS=Caulobacter crescentus (strain NA1000 / CB15N) GN=CCNA_01556 PE=4 SV=1 - [A0A0H3C7Q7_CAUCN]	CCNA_01556	1.00728	1.02412	0.973517	1.04566	0.941123	0.994947	1.02352	1.03309	0.985342	1.01099	1.03811	0.974633	0.990734	1.03468	1.05097	0.984497
A0A0H3C7Q8	Alpha-methylacyl-CoA racemase OS=Caulobacter crescentus (strain NA1000 / CB15N) GN=CCNA_01917 PE=4 SV=1 - [A0A0H3C7Q8_CAUCN]	CCNA_01917	1.15008	1.11026	1.24349	0.989468	1.08852	0.977285	0.871088	0.880459	0.981122	0.818353	0.860344	1.1989	0.989357	0.924884	1.01247	0.913497
A0A0H3C7Q9	Piperideine-6-carboxylate dehydrogenase OS=Caulobacter crescentus (strain NA1000 / CB15N) GN=CCNA_01274 PE=3 SV=1 - [A0A0H3C7Q9_CAUCN]	CCNA_01274	1.01416	0.964295	0.979731	1.04652	1.05957	1.00003	0.97671	1.0281	1.01918	1.04436	1.03192	0.975895	0.950017	1.03514	1.0465	0.989144
A0A0H3C7R0	Two-component sensor histidine kinase OS=Caulobacter crescentus (strain NA1000 / CB15N) GN=CCNA_01363 PE=4 SV=1 - [A0A0H3C7R0_CAUCN]	CCNA_01363	0.984759	1.28091	0.88673	0.971297	0.987102	0.862957	0.919868	1.00264	1.09067	1.02809	0.986329	1.06086	0.917448	1.11055	1.12554	0.986679
A0A0H3C7R1	Electron transfer flavoprotein alpha subunit OS=Caulobacter crescentus (strain NA1000 / CB15N) GN=CCNA_00763 PE=4 SV=1 - [A0A0H3C7R1_CAUCN]	CCNA_00763	0.941769	0.943809	0.968346	1.04338	1.00337	1.01745	0.844864	0.907962	1.11886	1.11244	1.10789	1.00578	0.930505	0.972554	1.02549	0.948384
A0A0H3C7R2	2-dehydro-3-deoxygluconokinase OS=Caulobacter crescentus (strain NA1000 / CB15N) GN=CCNA_01563 PE=4 SV=1 - [A0A0H3C7R2_CAUCN]	CCNA_01563	0.955266	0.935605	0.922808	1.08081	1.06156	1.0447	1.02966	1.02486	0.98688	0.984655	1.13142	1.00226	1.00468	1.03517	1.03456	1.00059
A0A0H3C7R4	Cell development regulator SpmY OS=Caulobacter crescentus (strain NA1000 / CB15N) GN=spmY PE=4 SV=1 - [A0A0H3C7R4_CAUCN]	spmY	1.12223	1.04456	1.0043	1.08807	1.12492	1.13825	0.827092	0.923485	0.89808	0.801603	0.969568	1.12035	0.895621	1.11742	0.955917	1.16896
A0A0H3C7R5	Acyl-CoA dehydrogenase OS=Caulobacter crescentus (strain NA1000 / CB15N) GN=CCNA_01368 PE=3 SV=1 - [A0A0H3C7R5_CAUCN]	CCNA_01368	0.932245	0.942768	0.964735	1.02104	1.00236	1.0365	0.88182	0.962575	1.18102	1.0625	1.09525	1.11155	0.916105	0.966323	0.985085	0.980954
A0A0H3C7R6	Uncharacterized protein OS=Caulobacter crescentus (strain NA1000 / CB15N) GN=CCNA_00768 PE=4 SV=1 - [A0A0H3C7R6_CAUCN]	CCNA_00768	0.909721	1.18262	0.905654	1.09134	0.988128	0.976835	1.03337	1.18126	0.932376	0.952385	1.19964	0.978991	0.874809	1.00449	1.11722	0.899099
A0A0H3C7R8	Enoyl-CoA hydratase OS=Caulobacter crescentus (strain NA1000 / CB15N) GN=CCNA_01927 PE=4 SV=1 - [A0A0H3C7R8_CAUCN]	CCNA_01927	1.18991	1.11477	1.05899	1.08888	1.05314	1.0105	0.91633	0.726722	0.92502	0.83848	0.915099	1.10321	1.26091	1.12363	1.07757	1.04275
A0A0H3C7R9	Proline iminopeptidase OS=Caulobacter crescentus (strain NA1000 / CB15N) GN=CCNA_01285 PE=3 SV=1 - [A0A0H3C7R9_CAUCN]	CCNA_01285	1.11977	1.1274	0.98829	1.05725	0.970001	0.862557	0.977982	0.908886	0.973713	0.876925	0.944167	1.11037	1.07602	1.13304	1.22572	0.924389
A0A0H3C7S0	Fe-S cluster assembly ABC-type transport system, permease and ATPase components OS=Caulobacter crescentus (strain NA1000 / CB15N) GN=CCNA_01374 PE=4 SV=1 - [A0A0H3C7S0_CAUCN]	CCNA_01374	0.921589	0.915371	0.969047	1.14931	0.9988	1.08853	1.0015	0.947789	1.07618	0.987033	1.2471	1.09032	1.05667	0.951026	1.05583	0.900734
A0A0H3C7S1	Glucose / sorbosone dehydrogenase OS=Caulobacter crescentus (strain NA1000 / CB15N) GN=CCNA_01575 PE=4 SV=1 - [A0A0H3C7S1_CAUCN]	CCNA_01575	0.861984	0.81313	0.814505	1.17732	1.17767	1.17645	0.866882	0.854345	1.21565	1.06539	1.36583	1.14104	1.01467	1.05829	1.00074	1.05751
A0A0H3C7S2	Ring hydroxylating diooxygenase OS=Caulobacter crescentus (strain NA1000 / CB15N) GN=CCNA_00774 PE=4 SV=1 - [A0A0H3C7S2_CAUCN]	CCNA_00774											#DIV/0!	#DIV/0!	#DIV/0!	#DIV/0!	#DIV/0!	#DIV/0!
A0A0H3C7S5	Type I secretion outer membrane protein rsaFb OS=Caulobacter crescentus (strain NA1000 / CB15N) GN=rsaFb PE=4 SV=1 - [A0A0H3C7S5_CAUCN]	rsaFb	0.967156	1.00466	0.9853	0.953012	0.978979	1.02239	1.03825	1.0324	1.10607	1.0364	0.985375	1.06722	1.00566	0.981585	0.932139	1.05305
A0A0H3C7S9	FeS assembly protein SufD OS=Caulobacter crescentus (strain NA1000 / CB15N) GN=sufD PE=4 SV=1 - [A0A0H3C7S9_CAUCN]	sufD	1.01662	1.00299	0.953991	1.01709	0.985033	1.04621	1.05688	0.961306	1.00951	0.995146	1.00046	1.01444	1.09942	1.06565	0.97217	1.09615
A0A0H3C7T1	Amidase family protein OS=Caulobacter crescentus (strain NA1000 / CB15N) GN=CCNA_01384 PE=3 SV=1 - [A0A0H3C7T1_CAUCN]	CCNA_01384	1.10548	1.10211	1.06207	0.862433	0.925342	0.874126	0.905618	1.13607	1.10173	0.967768	0.780145	1.13843	0.797148	1.04087	0.986623	1.05498
A0A0H3C7T2	Peptidoglycan-associated outer membrane lipoprotein OS=Caulobacter crescentus (strain NA1000 / CB15N) GN=CCNA_00784 PE=3 SV=1 - [A0A0H3C7T2_CAUCN]	CCNA_00784	0.935865	0.895696	0.965412	1.07805	1.05547	1.10542	0.979753	1.08731	0.970778	0.952387	1.15193	1.01931	0.901084	0.969395	0.975236	0.994011
A0A0H3C7T3	Sulfurtransferase FdhD OS=Caulobacter crescentus (strain NA1000 / CB15N) GN=fdhD PE=3 SV=1 - [A0A0H3C7T3_CAUCN]	fdhD	0.952299	1.01979	1.04342	0.937197	0.994896	1.0302	0.996103	1.09945	0.957458	1.06715	0.984141	0.89721	0.906	0.912673	0.909727	1.00324
A0A0H3C7T4	Rrf2 family protein OS=Caulobacter crescentus (strain NA1000 / CB15N) GN=CCNA_01942 PE=4 SV=1 - [A0A0H3C7T4_CAUCN]	CCNA_01942											#DIV/0!	#DIV/0!	#DIV/0!	#DIV/0!	#DIV/0!	#DIV/0!
A0A0H3C7T5	DNA polymerase III epsilon-like protein OS=Caulobacter crescentus (strain NA1000 / CB15N) GN=CCNA_01591 PE=4 SV=1 - [A0A0H3C7T5_CAUCN]	CCNA_01591	1.14114	1.09809	1.03071	1.05275	1.1831	1.17061	0.716631	0.618982	0.972676	0.883192	0.922546	1.10132	1.15776	1.10714	0.899318	1.23109
A0A0H3C7T8	50S ribosomal protein L3 OS=Caulobacter crescentus (strain NA1000 / CB15N) GN=rplC PE=3 SV=1 - [A0A0H3C7T8_CAUCN]	rplC	1.05529	1.00869	1.01716	0.926084	0.926113	0.900927	1.0482	1.05668	1.03027	1.05641	0.877567	0.975259	0.991978	1.03749	1.02792	1.0093
A0A0H3C7U0	DNA helicase OS=Caulobacter crescentus (strain NA1000 / CB15N) GN=uvrD PE=3 SV=1 - [A0A0H3C7U0_CAUCN]	uvrD	0.945184	0.953084	0.939489	1.13613	1.07994	1.13635	0.986231	0.947426	0.941603	0.967918	1.20202	0.972813	1.04096	1.00606	0.99981	1.00625
A0A0H3C7U1	Uracil DNA glycosylase superfamily protein OS=Caulobacter crescentus (strain NA1000 / CB15N) GN=CCNA_01394 PE=4 SV=1 - [A0A0H3C7U1_CAUCN]	CCNA_01394	0.980787	1.06158	0.989405	0.995373	0.968214	1.11344	1.08716	1.06181	0.966189	0.909586	1.01487	1.06223	1.02388	0.99129	0.89396	1.10888
A0A0H3C7U2	Oxygen sensory histidine kinase FixL OS=Caulobacter crescentus (strain NA1000 / CB15N) GN=fixL PE=4 SV=1 - [A0A0H3C7U2_CAUCN]	fixL	1.04642	1.06876	1.08014	1.01626	1.05693	1.05536	0.968491	0.932707	0.892934	0.928922	0.971177	0.961257	1.03837	0.968779	0.962953	1.00605
A0A0H3C7U3	ABC2-family membrane transporter OS=Caulobacter crescentus (strain NA1000 / CB15N) GN=CCNA_01334 PE=4 SV=1 - [A0A0H3C7U3_CAUCN]	CCNA_01334	0.919821	0.909748	1.02888	1.06411	1.19268	1.10549	1.12869	1.04431	0.910877	0.86151	1.15687	1.0573	1.0808	0.894003	0.96257	0.928767
A0A0H3C7U4	Zinc metalloprotease OS=Caulobacter crescentus (strain NA1000 / CB15N) GN=CCNA_01955 PE=4 SV=1 - [A0A0H3C7U4_CAUCN]	CCNA_01955	1.02751	0.998097	0.975101	0.970169	0.935894	0.95209	0.963285	1.03824	1.05303	1.13781	0.944194	0.925484	0.927803	1.05375	1.01899	1.03411
A0A0H3C7U6	Uncharacterized protein OS=Caulobacter crescentus (strain NA1000 / CB15N) GN=CCNA_01601 PE=4 SV=1 - [A0A0H3C7U6_CAUCN]	CCNA_01601	0.607599	0.575302	0.665235	1.6598	1.5724	1.7541	0.966995	0.603206	1.04379	0.682792	2.73174	1.52871	1.60309	0.91336	0.946243	0.965249
A0A0H3C7U7	ArsR-family transcriptional regulator OS=Caulobacter crescentus (strain NA1000 / CB15N) GN=CCNA_01339 PE=4 SV=1 - [A0A0H3C7U7_CAUCN]	CCNA_01339											#DIV/0!	#DIV/0!	#DIV/0!	#DIV/0!	#DIV/0!	#DIV/0!
A0A0H3C7U8	Nitrogen regulatory protein GlnK OS=Caulobacter crescentus (strain NA1000 / CB15N) GN=glnK PE=3 SV=1 - [A0A0H3C7U8_CAUCN]	glnK	1.15343	1.18365	1.21383	0.843348	0.880444	0.873306	1.16713	1.19932	0.781367	0.789916	0.731164	0.989177	0.973162	0.950243	0.965695	0.983998
A0A0H3C7V0	Uncharacterized protein OS=Caulobacter crescentus (strain NA1000 / CB15N) GN=CCNA_01344 PE=4 SV=1 - [A0A0H3C7V0_CAUCN]	CCNA_01344	0.98889	1.06574	1.02915	0.979123	1.01935	0.976875	0.951769	1.06641	1.0405	0.951556	0.990123	1.09347	0.892495	0.960878	1.0023	0.958671
A0A0H3C7V1	TetR-family transcriptional regulator OS=Caulobacter crescentus (strain NA1000 / CB15N) GN=CCNA_00811 PE=4 SV=1 - [A0A0H3C7V1_CAUCN]	CCNA_00811	1.01577	1.10223	0.939195	1.00855	0.838129	0.974592	0.864298	0.885106	1.1632	1.11321	0.992891	1.0449	0.976491	1.08153	1.03484	1.04512
A0A0H3C7V2	Phosphohydrolase, MutT/nudix family OS=Caulobacter crescentus (strain NA1000 / CB15N) GN=CCNA_01408 PE=4 SV=1 - [A0A0H3C7V2_CAUCN]	CCNA_01408	0.790553	0.963901	0.884806	1.09447	1.16013	1.15011	1.10776	0.978781	1.03779	0.987418	1.38444	1.05101	1.13178	0.893476	0.951621	0.938899
A0A0H3C7V3	Uncharacterized protein OS=Caulobacter crescentus (strain NA1000 / CB15N) GN=CCNA_01963 PE=4 SV=1 - [A0A0H3C7V3_CAUCN]	CCNA_01963											#DIV/0!	#DIV/0!	#DIV/0!	#DIV/0!	#DIV/0!	#DIV/0!
A0A0H3C7V4	Rod shape-determining protein MreB OS=Caulobacter crescentus (strain NA1000 / CB15N) GN=mreB PE=1 SV=1 - [A0A0H3C7V4_CAUCN]	mreB	1.01446	0.964363	1.01813	1.08228	1.03803	1.0211	0.978085	0.980336	0.953189	1.01453	1.06685	0.939539	0.997704	0.996392	1.05991	0.940068
A0A0H3C7V7	3-hydroxyisobutyryl-CoA hydrolase OS=Caulobacter crescentus (strain NA1000 / CB15N) GN=CCNA_01414 PE=4 SV=1 - [A0A0H3C7V7_CAUCN]	CCNA_01414	1.09371	1.05226	1.07286	0.971414	0.97223	0.983801	0.978505	0.897469	0.991413	0.934385	0.888179	1.06103	1.09029	1.01944	0.987409	1.03244
A0A0H3C7V8	Aspartyl-tRNA synthetase OS=Caulobacter crescentus (strain NA1000 / CB15N) GN=CCNA_01969 PE=3 SV=1 - [A0A0H3C7V8_CAUCN]	CCNA_01969	0.996677	0.992519	0.995058	0.987134	0.966297	0.989671	1.02888	1.03495	1.03076	1.03726	0.990426	0.993729	0.994132	1.00163	0.997436	1.0042
A0A0H3C7V9	Myo-inositol 2-dehydrogenase IdhA OS=Caulobacter crescentus (strain NA1000 / CB15N) GN=idhA PE=4 SV=1 - [A0A0H3C7V9_CAUCN]	idhA	1.42275	1.32397	1.39059	0.82845	0.745675	0.767906	0.784829	0.725217	0.925761	0.754306	0.582286	1.2273	1.0822	1.02313	1.07884	0.948358
A0A0H3C7W0	Uracil-DNA glycosylase OS=Caulobacter crescentus (strain NA1000 / CB15N) GN=CCNA_01618 PE=4 SV=1 - [A0A0H3C7W0_CAUCN]	CCNA_01618	0.909059	0.889391	0.978204	1.05409	0.949411	1.00488	1.07043	1.1022	1.09022	1.14882	1.15954	0.948988	0.971176	0.929315	1.04897	0.885929
A0A0H3C7W2	Serine hydroxymethyltransferase OS=Caulobacter crescentus (strain NA1000 / CB15N) GN=glyA PE=3 SV=1 - [A0A0H3C7W2_CAUCN]	glyA	1.08508	1.0531	1.08516	1.04477	1.04136	1.01948	0.923343	0.935749	0.878424	0.880463	0.962847	0.997685	0.986742	0.999929	1.02481	0.975722
A0A0H3C7W4	Myo-inositol catabolism protein IolB OS=Caulobacter crescentus (strain NA1000 / CB15N) GN=iolB PE=4 SV=1 - [A0A0H3C7W4_CAUCN]	iolB	1.41428	1.43576	1.37639	0.762311	0.779241	0.770763	0.827938	0.89752	0.904782	0.69203	0.53901	1.30743	0.922474	1.02753	0.989034	1.03892
A0A0H3C7W8	Alkaline phosphatase OS=Caulobacter crescentus (strain NA1000 / CB15N) GN=CCNA_01636 PE=4 SV=1 - [A0A0H3C7W8_CAUCN]	CCNA_01636	0.968468	1.02901	0.956239	1.08722	1.08043	1.06847	1.04318	0.977264	0.970275	0.914284	1.12262	1.06124	1.06745	1.01279	1.01755	0.995324
A0A0H3C7X0	tRNA-dihydrouridine(20/20a) synthase OS=Caulobacter crescentus (strain NA1000 / CB15N) GN=dusA PE=3 SV=1 - [A0A0H3C7X0_CAUCN]	dusA	1.05866	1.01775	1.03365	0.973808	0.923148	0.901486	1.04994	1.13573	0.957231	1.04724	0.91985	0.914052	0.924462	1.0242	1.08023	0.948133
A0A0H3C7X1	Flagellin OS=Caulobacter crescentus (strain NA1000 / CB15N) GN=fljM PE=3 SV=1 - [A0A0H3C7X1_CAUCN]	fljM	1.17742	0.747303	0.747519	0.667193	0.556434	0.570256	0.883191	1.255	1.83587	1.47444	0.566658	1.24513	0.703736	1.5751	1.16999	1.34625
A0A0H3C7X2	3-oxoacyl-[acyl-carrier-protein] synthase 3 OS=Caulobacter crescentus (strain NA1000 / CB15N) GN=fabH PE=3 SV=1 - [A0A0H3C7X2_CAUCN]	fabH	1.04654	1.04808	1.06573	0.90069	0.95078	0.965577	1.0252	1.05914	0.969712	0.992389	0.860637	0.977148	0.967956	0.981992	0.9328	1.05274
A0A0H3C7X3	2-nitropropane dioxygenase family protein OS=Caulobacter crescentus (strain NA1000 / CB15N) GN=CCNA_01641 PE=4 SV=1 - [A0A0H3C7X3_CAUCN]	CCNA_01641	0.947566	0.899705	0.944205	1.10212	1.02425	0.997342	1.00176	0.943388	1.12134	1.04159	1.16311	1.07657	1.06188	1.00356	1.10506	0.908151
A0A0H3C7X4	Lipid-A-disaccharide synthase OS=Caulobacter crescentus (strain NA1000 / CB15N) GN=lpxB PE=3 SV=1 - [A0A0H3C7X4_CAUCN]	lpxB	1.03048	0.968693	1.06414	0.982095	0.939258	1.01187	0.934934	0.990006	1.07329	1.02039	0.953042	1.05184	0.944372	0.968371	0.970572	0.997733
A0A0H3C7X5	Acyl-CoA dehydrogenase, short-chain specific OS=Caulobacter crescentus (strain NA1000 / CB15N) GN=CCNA_01369 PE=3 SV=1 - [A0A0H3C7X5_CAUCN]	CCNA_01369	1.06587	1.04607	1.03376	0.959043	0.920738	0.896383	0.824078	0.953349	1.16287	1.06245	0.899771	1.09451	0.864403	1.03106	1.0699	0.963699
A0A0H3C7X7	Glucan 1,4-beta-glucosidase OS=Caulobacter crescentus (strain NA1000 / CB15N) GN=CCNA_00839 PE=4 SV=1 - [A0A0H3C7X7_CAUCN]	CCNA_00839	0.796466	0.899245	0.83203	0.758244	0.77558	0.773484	2.38384	2.25399	0.733772	0.723674	0.952011	1.01395	1.05761	0.957256	0.980297	0.976496
A0A0H3C7X8	50S ribosomal protein L13 OS=Caulobacter crescentus (strain NA1000 / CB15N) GN=rplM PE=3 SV=1 - [A0A0H3C7X8_CAUCN]	rplM	1.01261	1.1279	1.0901	0.900225	0.923496	0.960972	0.977677	1.12625	1.0283	0.997928	0.889015	1.03043	0.86808	0.928913	0.936787	0.991595
A0A0H3C7Y0	Lactoylglutathione lyase OS=Caulobacter crescentus (strain NA1000 / CB15N) GN=CCNA_01375 PE=4 SV=1 - [A0A0H3C7Y0_CAUCN]	CCNA_01375	0.900993	0.877959	0.927598	1.1475	1.06342	1.16475	0.904616	0.849779	1.1103	1.01037	1.27359	1.09891	1.06453	0.971319	0.985193	0.985918
A0A0H3C7Y1	Peptidyl-prolyl cis-trans isomerase OS=Caulobacter crescentus (strain NA1000 / CB15N) GN=CCNA_01655 PE=3 SV=1 - [A0A0H3C7Y1_CAUCN]	CCNA_01655	0.988165	0.983089	0.982946	0.982255	0.975653	0.996464	1.02817	1.06773	0.972444	1.0082	0.994019	0.964533	0.962955	1.00531	0.985741	1.01985
A0A0H3C7Y3	Homoserine dehydrogenase OS=Caulobacter crescentus (strain NA1000 / CB15N) GN=CCNA_01447 PE=3 SV=1 - [A0A0H3C7Y3_CAUCN]	CCNA_01447	0.992084	1.09898	1.10118	0.923025	0.973672	0.898228	1.03862	0.992349	1.03361	1.04978	0.93039	0.984597	1.04663	0.900925	1.02761	0.876721
A0A0H3C7Y4	Pole-organizing protein popZ OS=Caulobacter crescentus (strain NA1000 / CB15N) GN=popZ PE=4 SV=1 - [A0A0H3C7Y4_CAUCN]	popZ	1.05222	1.20338	1.03232	1.08321	0.978075	0.968476	0.967069	0.916067	1.02201	0.886107	1.02945	1.15337	1.05568	1.01927	1.11847	0.911312
A0A0H3C7Y5	Inosine-uridine nucleoside N-ribohydrolase OS=Caulobacter crescentus (strain NA1000 / CB15N) GN=CCNA_02005 PE=4 SV=1 - [A0A0H3C7Y5_CAUCN]	CCNA_02005	0.984627	0.976694	0.995119	1.07461	1.0498	1.07395	0.992711	0.939603	0.96465	0.971523	1.09139	0.992926	1.05652	0.989457	1.00061	0.988851
A0A0H3C7Y7	Outer membrane efflux protein OS=Caulobacter crescentus (strain NA1000 / CB15N) GN=CCNA_00849 PE=3 SV=1 - [A0A0H3C7Y7_CAUCN]	CCNA_00849	0.793211	0.826151	0.821836	0.961793	0.978105	0.975435	1.11332	1.17321	1.23654	1.23454	1.21253	1.00163	0.948945	0.96517	0.986015	0.97886
A0A0H3C7Y8	rRNA methylase OS=Caulobacter crescentus (strain NA1000 / CB15N) GN=CCNA_01385 PE=4 SV=1 - [A0A0H3C7Y8_CAUCN]	CCNA_01385	0.993094	0.85007	0.814383	1.05282	1.04536	0.86199	1.10984	1.2652	1.0099	1.17455	1.06014	0.859818	0.8772	1.21944	1.22138	0.998414
A0A0H3C7Y9	Sulfate/thiosulfate import ATP-binding protein CysA OS=Caulobacter crescentus (strain NA1000 / CB15N) GN=cysA PE=3 SV=1 - [A0A0H3C7Y9_CAUCN]	cysA	1.0052	1.00213	0.990112	0.934491	0.925544	0.91784	1.19268	1.11141	1.00621	1.04262	0.929653	0.965074	1.07313	1.01524	1.01814	0.997152
A0A0H3C7Z0	Uncharacterized protein OS=Caulobacter crescentus (strain NA1000 / CB15N) GN=CCNA_01452 PE=4 SV=1 - [A0A0H3C7Z0_CAUCN]	CCNA_01452	0.950809	1.10348	1.08524	0.923762	0.92896	0.973989	0.941641	0.887463	1.05243	0.993752	0.971554	1.05905	1.06105	0.876132	0.948432	0.923768
A0A0H3C7Z1	Methylmalonyl CoA epimerase OS=Caulobacter crescentus (strain NA1000 / CB15N) GN=CCNA_02011 PE=4 SV=1 - [A0A0H3C7Z1_CAUCN]	CCNA_02011	0.980276	1.04097	1.0173	1.04986	1.00586	1.05773	0.850234	0.878221	1.03857	0.964215	1.07098	1.07712	0.968131	0.963607	0.992558	0.970832
A0A0H3C7Z3	Outer membrane protein OS=Caulobacter crescentus (strain NA1000 / CB15N) GN=CCNA_01675 PE=4 SV=1 - [A0A0H3C7Z3_CAUCN]	CCNA_01675	0.958948	0.947292	1.00856	0.987445	1.08804	1.02624	1.03775	1.12532	0.96845	0.95478	1.02972	1.01432	0.922177	0.950809	0.962196	0.988166
A0A0H3C7Z6	NADH-quinone oxidoreductase chain M OS=Caulobacter crescentus (strain NA1000 / CB15N) GN=nuoM PE=4 SV=1 - [A0A0H3C7Z6_CAUCN]	nuoM	1.0024	1.13689	1.05112	0.919519	1.02187	1.01406	0.997811	0.918473	0.998525	0.979283	0.917318	1.01965	1.08638	0.95365	0.906769	1.0517
A0A0H3C7Z7	Acetyltransferase, GNAT family OS=Caulobacter crescentus (strain NA1000 / CB15N) GN=CCNA_00859 PE=4 SV=1 - [A0A0H3C7Z7_CAUCN]	CCNA_00859	1.03172	1.02097	0.959032	0.88125	0.89498	0.897997	1.09951	1.15989	0.946903	1.02646	0.854152	0.922496	0.947944	1.0758	0.981351	1.09624
A0A0H3C7Z8	N-succinylarginine dihydrolase OS=Caulobacter crescentus (strain NA1000 / CB15N) GN=astB PE=3 SV=1 - [A0A0H3C7Z8_CAUCN]	astB	1.0044	0.978375	0.968953	1.06023	1.03513	1.01672	1.04095	0.992325	0.964117	0.989339	1.05558	0.974506	1.049	1.03659	1.0428	0.994042
A0A0H3C7Z9	Electron transfer flavoprotein-ubiquinone oxidoreductase FzeA OS=Caulobacter crescentus (strain NA1000 / CB15N) GN=fzeA PE=4 SV=1 - [A0A0H3C7Z9_CAUCN]	fzeA	1.03209	1.00282	1.02713	1.05839	0.991223	1.02913	0.858023	0.907914	1.00896	0.991863	1.02548	1.01723	0.945048	1.00483	1.02843	0.97705
A0A0H3C801	Alpha-ketoglutaric semialdehyde dehydrogenase xylA OS=Caulobacter crescentus (strain NA1000 / CB15N) GN=xylA PE=3 SV=1 - [A0A0H3C801_CAUCN]	xylA	0.704236	0.705945	0.682372	0.689701	0.660354	0.846966	0.676049	5.28787	0.639408	0.834565	0.97936	0.766157	0.127849	1.03204	0.814319	1.26737
A0A0H3C802	NADH-quinone oxidoreductase subunit H OS=Caulobacter crescentus (strain NA1000 / CB15N) GN=nuoH PE=3 SV=1 - [A0A0H3C802_CAUCN]	nuoH	0.9499	0.980734	1.02022	1.00857	1.00871	1.03317	1.05145	1.08524	0.964833	0.980088	1.06177	0.984435	0.968862	0.931074	0.976192	0.953782
A0A0H3C804	Glycine--tRNA ligase beta subunit OS=Caulobacter crescentus (strain NA1000 / CB15N) GN=glyS PE=3 SV=1 - [A0A0H3C804_CAUCN]	glyS	1.04061	1.01194	1.01979	0.948784	0.942528	0.937132	1.00273	1.03126	1.02981	1.06705	0.911753	0.965097	0.972333	1.02042	1.01243	1.00789
A0A0H3C805	Carbon-nitrogen hydrolase family protein OS=Caulobacter crescentus (strain NA1000 / CB15N) GN=CCNA_00871 PE=4 SV=1 - [A0A0H3C805_CAUCN]	CCNA_00871	0.906282	0.899664	0.911481	1.20367	1.0971	1.0551	0.96646	0.955991	1.09748	1.04366	1.32814	1.05157	1.01095	0.994296	1.14081	0.87157
A0A0H3C806	Cbb3-type cytochrome c oxidase subunit OS=Caulobacter crescentus (strain NA1000 / CB15N) GN=ccoP PE=3 SV=1 - [A0A0H3C806_CAUCN]	ccoP	0.676238	1.05024	1.05933	1.31985	1.50669	1.56704	0.721495	0.674677	0.85259	0.629194	1.95175	1.35505	1.06939	0.638366	0.842257	0.757923
A0A0H3C808	NADH-quinone oxidoreductase chain E OS=Caulobacter crescentus (strain NA1000 / CB15N) GN=nuoE PE=4 SV=1 - [A0A0H3C808_CAUCN]	nuoE	1.04771	1.03778	1.0399	0.9696	0.957694	0.965229	1.08696	1.05519	0.949706	0.971404	0.925444	0.977663	1.0301	1.00751	1.00453	1.00297
A0A0H3C809	Delta-aminolevulinic acid dehydratase OS=Caulobacter crescentus (strain NA1000 / CB15N) GN=CCNA_01409 PE=3 SV=1 - [A0A0H3C809_CAUCN]	CCNA_01409	0.987683	1.02226	0.988034	0.954176	0.978402	1.01789	0.995885	0.992661	1.02708	1.04836	0.966075	0.979694	1.00325	0.999645	0.937402	1.0664
A0A0H3C810	7,8-dihydro-8-oxoguanine-triphosphatase OS=Caulobacter crescentus (strain NA1000 / CB15N) GN=CCNA_00876 PE=4 SV=1 - [A0A0H3C810_CAUCN]	CCNA_00876	0.99341	0.973859	1.03134	0.940659	0.92312	0.977121	1.02982	1.02127	1.05204	1.12599	0.9469	0.93433	1.00837	0.963227	0.962684	1.00056
A0A0H3C811	OmpW family outer membrane cation channel OS=Caulobacter crescentus (strain NA1000 / CB15N) GN=ompW PE=4 SV=1 - [A0A0H3C811_CAUCN]	ompW	0.810779	1.4023	1.38633	0.945662	1.1757	1.18548	0.750403	0.736512	0.796301	0.726081	1.16636	1.09671	1.01886	0.584839	0.797703	0.733155
A0A0H3C813	Methyltransferase OS=Caulobacter crescentus (strain NA1000 / CB15N) GN=CCNA_01415 PE=4 SV=1 - [A0A0H3C813_CAUCN]	CCNA_01415	1.04106	1.04516	1.01996	1.01285	0.990914	0.973044	1.01441	0.989813	0.969129	0.982359	0.972897	0.986532	1.02485	1.02069	1.04091	0.980581
A0A0H3C814	NADH-quinone oxidoreductase subunit A OS=Caulobacter crescentus (strain NA1000 / CB15N) GN=nuoA PE=3 SV=1 - [A0A0H3C814_CAUCN]	nuoA	1.01234	1.00933	1.01226	1.05227	1.03638	1.00395	1.08224	1.03725	0.94721	0.918227	1.03944	1.03156	1.04337	1.00008	1.04813	0.954152
A0A0H3C815	Uncharacterized protein OS=Caulobacter crescentus (strain NA1000 / CB15N) GN=CCNA_01480 PE=4 SV=1 - [A0A0H3C815_CAUCN]	CCNA_01480	1.00908	0.99805	0.989393	1.08331	1.05399	1.03659	0.903501	0.940769	0.981431	0.903767	1.07356	1.08593	0.960385	1.0199	1.04507	0.975913
A0A0H3C816	ABC transporter ATP-binding protein OS=Caulobacter crescentus (strain NA1000 / CB15N) GN=CCNA_00881 PE=4 SV=1 - [A0A0H3C816_CAUCN]	CCNA_00881	1.0254	1.03387	1.02725	1.00347	1.01731	1.06316	0.938526	1.04093	0.948981	0.965399	0.978612	0.982994	0.901619	0.998199	0.943859	1.05757
A0A0H3C818	Uncharacterized protein OS=Caulobacter crescentus (strain NA1000 / CB15N) GN=CCNA_00887 PE=4 SV=1 - [A0A0H3C818_CAUCN]	CCNA_00887											#DIV/0!	#DIV/0!	#DIV/0!	#DIV/0!	#DIV/0!	#DIV/0!
A0A0H3C819	6,7-dimethyl-8-ribityllumazine synthase OS=Caulobacter crescentus (strain NA1000 / CB15N) GN=ribH PE=3 SV=1 - [A0A0H3C819_CAUCN]	ribH	0.977971	0.965677	1.05275	0.962538	0.966193	0.927812	1.03106	1.08091	1.00817	1.10331	0.98422	0.913768	0.953882	0.928967	1.03743	0.895452
A0A0H3C821	Fumarylacetoacetate (FAA) hydrolase family protein OS=Caulobacter crescentus (strain NA1000 / CB15N) GN=CCNA_01486 PE=4 SV=1 - [A0A0H3C821_CAUCN]	CCNA_01486	0.77198	0.688679	0.84945	1.17096	1.11214	1.22682	1.0787	0.91886	1.21693	1.07628	1.51682	1.13069	1.17396	0.908799	0.954468	0.952152
A0A0H3C823	Phosphoenolpyruvate-protein phosphotransferase PtsP OS=Caulobacter crescentus (strain NA1000 / CB15N) GN=ptsP PE=3 SV=1 - [A0A0H3C823_CAUCN]	ptsP	1.04165	1.03205	1.03394	1.05908	1.07675	1.07332	0.946477	0.973123	0.895057	0.929655	1.01673	0.962784	0.972618	1.00745	0.986726	1.021
A0A0H3C824	Imidazolonepropionase related amidohydrolase OS=Caulobacter crescentus (strain NA1000 / CB15N) GN=CCNA_02050 PE=4 SV=1 - [A0A0H3C824_CAUCN]	CCNA_02050	1.16951	1.17473	1.15667	0.950262	0.948926	0.942869	0.980134	0.978186	0.883674	0.809717	0.812529	1.09134	1.00199	1.0111	1.00784	1.00323
A0A0H3C825	Cystathionine beta-lyase OS=Caulobacter crescentus (strain NA1000 / CB15N) GN=CCNA_01491 PE=3 SV=1 - [A0A0H3C825_CAUCN]	CCNA_01491	0.958296	0.953168	0.992824	1.04296	0.98683	1.11522	1.00627	0.986086	1.01653	0.966381	1.08835	1.0519	1.02047	0.965223	0.935209	1.03209
A0A0H3C826	Beta-barrel assembly machine (BAM) protein BamE OS=Caulobacter crescentus (strain NA1000 / CB15N) GN=bamE PE=4 SV=1 - [A0A0H3C826_CAUCN]	bamE	1.03756	1.02331	1.04954	0.878858	0.895071	0.931566	1.02729	1.11059	1.04286	1.04162	0.847047	1.00119	0.924991	0.988578	0.943419	1.04787
A0A0H3C829	ATP12 family chaperone protein OS=Caulobacter crescentus (strain NA1000 / CB15N) GN=CCNA_02056 PE=4 SV=1 - [A0A0H3C829_CAUCN]	CCNA_02056	1.04678	1.06006	1.1082	0.953868	0.9796	0.958225	1.00464	1.02342	0.995292	0.976847	0.911242	1.01888	0.981646	0.944574	0.995453	0.948889
A0A0H3C831	ADP-L-glycero-D-manno-heptose-6-epimerase OS=Caulobacter crescentus (strain NA1000 / CB15N) GN=hldD PE=3 SV=1 - [A0A0H3C831_CAUCN]	hldD	0.944742	0.939728	0.955898	1.003	0.964453	0.973179	0.995048	0.974147	1.09844	1.14415	1.06167	0.960048	1.02146	0.98833	1.03064	0.958944
A0A0H3C832	MerR-family transcriptional regulator OS=Caulobacter crescentus (strain NA1000 / CB15N) GN=CCNA_01434 PE=4 SV=1 - [A0A0H3C832_CAUCN]	CCNA_01434	1.07907	1.01096	1.00832	1.18324	1.11289	1.22649	0.846068	0.767993	1.0029	0.725626	1.09654	1.38211	1.10166	1.07017	0.96474	1.10928
A0A0H3C834	Inositol ABC transporter, periplasmic inositol-binding protein IbpA OS=Caulobacter crescentus (strain NA1000 / CB15N) GN=ibpA PE=1 SV=1 - [A0A0H3C834_CAUCN]	ibpA	1.3966	1.33029	1.39802	0.717259	0.848191	0.738914	0.803279	0.838754	0.974926	0.782904	0.513577	1.24527	0.957705	0.998984	0.970694	1.02914
A0A0H3C835	DNA repair protein RecN OS=Caulobacter crescentus (strain NA1000 / CB15N) GN=CCNA_02062 PE=3 SV=1 - [A0A0H3C835_CAUCN]	CCNA_02062	0.9913	1.03552	0.955705	1.08567	1.06538	1.0623	0.949902	1.00246	0.961535	0.951425	1.09519	1.01063	0.94757	1.03725	1.02199	1.01492
A0A0H3C836	Short chain dehydrogenase OS=Caulobacter crescentus (strain NA1000 / CB15N) GN=CCNA_01728 PE=4 SV=1 - [A0A0H3C836_CAUCN]	CCNA_01728	0.998934	0.998399	0.995337	1.03592	1.02904	1.00635	1.0448	0.992299	0.985174	0.982142	1.03702	1.00309	1.05291	1.00361	1.02938	0.974969
A0A0H3C837	Uncharacterized protein OS=Caulobacter crescentus (strain NA1000 / CB15N) GN=CCNA_01443 PE=4 SV=1 - [A0A0H3C837_CAUCN]	CCNA_01443	0.962761	1.01429	0.996123	0.955814	0.995615	1.04366	1.01994	1.02583	1.00287	1.07115	0.992785	0.936257	0.994261	0.966508	0.915826	1.05534
A0A0H3C840	Fructose-1,6-bisphosphatase OS=Caulobacter crescentus (strain NA1000 / CB15N) GN=glpX PE=3 SV=1 - [A0A0H3C840_CAUCN]	glpX	1.11453	1.12333	1.13273	0.977978	0.893477	0.949084	0.864604	0.902547	1.00885	0.969169	0.87748	1.04094	0.95796	0.983936	1.03044	0.954866
A0A0H3C841	Conserved membrane spanning protein OS=Caulobacter crescentus (strain NA1000 / CB15N) GN=CCNA_02067 PE=4 SV=1 - [A0A0H3C841_CAUCN]	CCNA_02067	1.09564	1.04635	1.13263	0.900522	0.976558	1.00724	1.01175	1.10482	0.923542	0.906829	0.821911	1.01843	0.915755	0.967346	0.894047	1.08199
A0A0H3C842	Cystine transport system permease protein OS=Caulobacter crescentus (strain NA1000 / CB15N) GN=CCNA_01507 PE=3 SV=1 - [A0A0H3C842_CAUCN]	CCNA_01507	1.09958	0.964879	0.989787	0.937687	0.977326	0.968625	1.05303	0.927885	1.06274	1.0439	0.852771	1.01805	1.13487	1.11092	0.96806	1.14758
A0A0H3C843	Alanine racemase OS=Caulobacter crescentus (strain NA1000 / CB15N) GN=CCNA_01733 PE=3 SV=1 - [A0A0H3C843_CAUCN]	CCNA_01733	0.985712	0.941407	0.989646	1.03014	0.941761	1.0054	1.09462	1.07096	1.00671	1.06151	1.04507	0.948368	1.02209	0.996024	1.02461	0.972102
A0A0H3C844	Beta-lactamase family protein OS=Caulobacter crescentus (strain NA1000 / CB15N) GN=CCNA_00912 PE=4 SV=1 - [A0A0H3C844_CAUCN]	CCNA_00912	1.02616	1.09969	0.97584	1.05865	0.952505	1.03262	1.0721	1.08669	0.946111	0.857962	1.03166	1.10274	0.986573	1.05157	1.02521	1.02571
A0A0H3C846	ATP-dependent protease subunit OS=Caulobacter crescentus (strain NA1000 / CB15N) GN=CCNA_02072 PE=4 SV=1 - [A0A0H3C846_CAUCN]	CCNA_02072	1.0253	1.04813	1.01796	1.01009	0.915418	0.971409	0.980613	0.984327	0.979161	1.01364	0.985162	0.965983	0.996227	1.00721	1.03982	0.968643
A0A0H3C847	Electron transport complex I subunit, NADH-ubiquinone oxidoreductase OS=Caulobacter crescentus (strain NA1000 / CB15N) GN=CCNA_01453 PE=4 SV=1 - [A0A0H3C847_CAUCN]	CCNA_01453	0.990565	1.01318	1.0157	1.00623	1.03729	1.04532	1.01058	0.944775	0.973145	0.959361	1.01581	1.01437	1.06965	0.97525	0.962604	1.01314
A0A0H3C848	TonB-dependent outer membrane receptor OS=Caulobacter crescentus (strain NA1000 / CB15N) GN=CCNA_01738 PE=3 SV=1 - [A0A0H3C848_CAUCN]	CCNA_01738	0.883731	0.895249	0.929721	1.01612	0.997731	1.02378	1.02794	0.995048	1.20971	1.08727	1.1498	1.11261	1.03305	0.950534	0.99251	0.957707
A0A0H3C849	Antitoxin protein parD-1 OS=Caulobacter crescentus (strain NA1000 / CB15N) GN=parD-1 PE=4 SV=1 - [A0A0H3C849_CAUCN]	parD-1	1.05609	0.92562	0.920979	0.891061	0.837408	1.01435	1.06313	1.37403	1.03128	1.08317	0.843738	0.952089	0.773728	1.1467	0.878453	1.30536
A0A0H3C850	Segregation and condensation protein B OS=Caulobacter crescentus (strain NA1000 / CB15N) GN=scpB PE=3 SV=1 - [A0A0H3C850_CAUCN]	scpB	0.910758	0.934017	0.947775	0.997697	1.17265	1.1219	0.990721	0.772866	1.21869	0.949577	1.09546	1.2834	1.28188	0.960943	0.889296	1.08057
A0A0H3C851	Uncharacterized protein OS=Caulobacter crescentus (strain NA1000 / CB15N) GN=CCNA_01517 PE=4 SV=1 - [A0A0H3C851_CAUCN]	CCNA_01517	0.915061	0.956476	0.943382	1.22376	1.19805	1.21855	0.905217	0.911971	0.890969	0.827919	1.33735	1.07616	0.992595	0.969979	1.00427	0.965851
A0A0H3C853	Malonyl CoA-acyl carrier protein transacylase OS=Caulobacter crescentus (strain NA1000 / CB15N) GN=CCNA_01746 PE=3 SV=1 - [A0A0H3C853_CAUCN]	CCNA_01746	0.999905	0.992957	1.02704	1.01403	0.990547	1.00204	1.02466	0.987446	1.02079	1.0252	1.01412	0.995699	1.03769	0.973578	1.01196	0.962067
A0A0H3C855	Chaperone protein ClpB OS=Caulobacter crescentus (strain NA1000 / CB15N) GN=clpB PE=3 SV=1 - [A0A0H3C855_CAUCN]	clpB	0.911205	0.948675	0.937243	1.0347	1.02361	1.04293	0.958326	0.952405	1.18373	1.04719	1.13553	1.13039	1.00622	0.972219	0.992103	0.979958
A0A0H3C856	Exodeoxyribonuclease III OS=Caulobacter crescentus (strain NA1000 / CB15N) GN=CCNA_02090 PE=4 SV=1 - [A0A0H3C856_CAUCN]	CCNA_02090	0.972439	0.918321	0.964855	1.10493	1.10091	1.11494	0.943091	0.888077	0.984837	0.998932	1.13625	0.98589	1.06195	1.00786	0.991027	1.01699
A0A0H3C858	YicC-family protein OS=Caulobacter crescentus (strain NA1000 / CB15N) GN=CCNA_01752 PE=4 SV=1 - [A0A0H3C858_CAUCN]	CCNA_01752	0.978669	1.00701	0.957758	0.9786	0.977766	0.919156	0.988602	1.02959	1.11456	1.03354	0.99993	1.0784	0.960194	1.02183	1.06467	0.959762
A0A0H3C860	FlaG superfamily protein OS=Caulobacter crescentus (strain NA1000 / CB15N) GN=CCNA_01529 PE=4 SV=1 - [A0A0H3C860_CAUCN]	CCNA_01529	1.15156	0.981901	0.991013	0.953569	0.853695	1.00946	1.06467	1.04865	1.02467	0.981209	0.828064	1.04429	1.01527	1.16201	0.94463	1.23012
A0A0H3C861	Polyferredoxin protein fixG OS=Caulobacter crescentus (strain NA1000 / CB15N) GN=fixG PE=4 SV=1 - [A0A0H3C861_CAUCN]	fixG											#DIV/0!	#DIV/0!	#DIV/0!	#DIV/0!	#DIV/0!	#DIV/0!
A0A0H3C862	Ribosomal RNA small subunit methyltransferase A OS=Caulobacter crescentus (strain NA1000 / CB15N) GN=rsmA PE=3 SV=1 - [A0A0H3C862_CAUCN]	rsmA	1.02522	1.03878	1.0658	0.929641	0.879341	0.916026	1.04934	1.09172	0.990618	1.06567	0.906773	0.929576	0.961179	0.961928	1.01486	0.947841
A0A0H3C863	6,7-dimethyl-8-ribityllumazine synthase OS=Caulobacter crescentus (strain NA1000 / CB15N) GN=ribH PE=3 SV=1 - [A0A0H3C863_CAUCN]	ribH	0.772145	0.758174	0.75845	0.820334	0.72355	0.806891	2.29097	2.31459	0.893581	0.808505	1.06241	1.10523	0.989794	1.01806	1.01666	1.00137
A0A0H3C864	NAD/NADH-dependent eicosanoid dehydrogenase OS=Caulobacter crescentus (strain NA1000 / CB15N) GN=CCNA_02095 PE=4 SV=1 - [A0A0H3C864_CAUCN]	CCNA_02095	0.949056	0.955853	1.02841	0.90536	0.981061	0.94853	0.870488	0.957627	1.19997	1.26383	0.953959	0.949472	0.909006	0.92284	0.954487	0.966843
A0A0H3C865	Uncharacterized protein OS=Caulobacter crescentus (strain NA1000 / CB15N) GN=CCNA_01534 PE=4 SV=1 - [A0A0H3C865_CAUCN]	CCNA_01534	1.00524	1.07633	1.07143	0.912549	0.917199	0.973827	0.998006	1.13539	0.98117	1.02356	0.907792	0.958586	0.879002	0.938224	0.937075	1.00123
A0A0H3C866	CRP-family transcription regulator FtrB OS=Caulobacter crescentus (strain NA1000 / CB15N) GN=ftrB PE=4 SV=1 - [A0A0H3C866_CAUCN]	ftrB	0.793519	0.81197	0.88353	1.20858	1.27149	1.38195	0.965144	0.957252	0.849972	1.0361	1.52306	0.820357	1.00824	0.898123	0.874548	1.02696
A0A0H3C867	YjgP/YjgQ family membrane permease OS=Caulobacter crescentus (strain NA1000 / CB15N) GN=CCNA_01762 PE=4 SV=1 - [A0A0H3C867_CAUCN]	CCNA_01762	1.01091	0.933799	0.99616	1.01859	1.02462	1.04165	1.04454	1.03174	0.957373	0.978115	1.00759	0.978794	1.01241	1.01481	0.97786	1.03779
A0A0H3C869	Acetyltransferase OS=Caulobacter crescentus (strain NA1000 / CB15N) GN=CCNA_00937 PE=4 SV=1 - [A0A0H3C869_CAUCN]	CCNA_00937	0.92696	1.01952	0.922533	1.07915	1.09418	1.05291	0.958631	0.929035	1.02695	1.03815	1.16418	0.989205	1.03186	1.0048	1.02492	0.980372
A0A0H3C870	Cyclase homology domain protein OS=Caulobacter crescentus (strain NA1000 / CB15N) GN=CCNA_01481 PE=4 SV=1 - [A0A0H3C870_CAUCN]	CCNA_01481											#DIV/0!	#DIV/0!	#DIV/0!	#DIV/0!	#DIV/0!	#DIV/0!
A0A0H3C871	Pirin family protein OS=Caulobacter crescentus (strain NA1000 / CB15N) GN=CCNA_01539 PE=3 SV=1 - [A0A0H3C871_CAUCN]	CCNA_01539	0.982907	1.0014	0.961641	1.14175	1.07191	1.14126	0.909516	0.859768	1.06852	0.920901	1.1616	1.1603	1.05786	1.02211	1.00043	1.02168
A0A0H3C874	TonB-dependent outer membrane receptor OS=Caulobacter crescentus (strain NA1000 / CB15N) GN=CCNA_02106 PE=4 SV=1 - [A0A0H3C874_CAUCN]	CCNA_02106	1.00885	1.09077	1.00256	0.932202	0.963928	0.971081	1.16736	1.19757	0.960652	0.933614	0.924024	1.02896	0.974778	1.00628	0.959963	1.04825
A0A0H3C875	GntR-family transcriptional regulator OS=Caulobacter crescentus (strain NA1000 / CB15N) GN=CCNA_01487 PE=4 SV=1 - [A0A0H3C875_CAUCN]	CCNA_01487	1.00665	1.07926	0.971321	0.992914	0.936292	0.986512	0.957126	1.01761	1.00878	1.08358	0.986359	0.930972	0.940567	1.03637	1.00649	1.02969
A0A0H3C877	Aspartate racemase OS=Caulobacter crescentus (strain NA1000 / CB15N) GN=CCNA_02113 PE=3 SV=1 - [A0A0H3C877_CAUCN]	CCNA_02113	1.03288	1.03041	1.04232	1.05932	1.02947	1.08799	0.982456	0.912364	1.0004	0.884495	1.0256	1.13104	1.07682	0.990942	0.973653	1.01776
A0A0H3C878	Flagellar hook protein FlgE OS=Caulobacter crescentus (strain NA1000 / CB15N) GN=flgE PE=3 SV=1 - [A0A0H3C878_CAUCN]	flgE	1.20713	1.04332	0.944978	0.969211	0.9465	0.866836	0.926966	0.886309	1.12665	0.98059	0.802905	1.14895	1.04587	1.27742	1.1181	1.14249
A0A0H3C879	3-mercaptopyruvate sulfurtransferase OS=Caulobacter crescentus (strain NA1000 / CB15N) GN=CCNA_01492 PE=4 SV=1 - [A0A0H3C879_CAUCN]	CCNA_01492	0.918472	0.966589	1.02708	1.11064	1.05922	1.07042	0.9133	0.959718	1.05076	0.985597	1.20923	1.06611	0.951633	0.894258	1.03758	0.86187
A0A0H3C880	Penicillin-binding protein OS=Caulobacter crescentus (strain NA1000 / CB15N) GN=CCNA_01778 PE=4 SV=1 - [A0A0H3C880_CAUCN]	CCNA_01778	1.14671	1.00808	1.06923	1.0686	1.07562	1.01521	1.15452	1.01471	0.781047	0.784443	0.931884	0.995671	1.13779	1.07247	1.05259	1.01888
A0A0H3C881	ATP-dependent helicase, dinG family OS=Caulobacter crescentus (strain NA1000 / CB15N) GN=CCNA_02118 PE=4 SV=1 - [A0A0H3C881_CAUCN]	CCNA_02118	1.02815	0.888646	0.869432	1.06369	1.11044	1.11407	1.10216	1.14333	0.924001	0.928115	1.03456	0.995567	0.963994	1.18256	0.954781	1.23856
A0A0H3C882	3-hydroxy-3-methylglutaryl CoA synthase OS=Caulobacter crescentus (strain NA1000 / CB15N) GN=CCNA_01498 PE=4 SV=1 - [A0A0H3C882_CAUCN]	CCNA_01498											#DIV/0!	#DIV/0!	#DIV/0!	#DIV/0!	#DIV/0!	#DIV/0!
A0A0H3C883	Flagellar assembly protein FlbE/FliH OS=Caulobacter crescentus (strain NA1000 / CB15N) GN=flbE PE=4 SV=1 - [A0A0H3C883_CAUCN]	flbE	1.00124	1.04054	0.94622	1.03548	1.02843	1.07242	0.930911	0.90758	1.0468	0.992471	1.0342	1.05474	1.02571	1.05815	0.96556	1.09589
A0A0H3C884	Chromosome replication regulator protein HdaA OS=Caulobacter crescentus (strain NA1000 / CB15N) GN=hdaA PE=4 SV=1 - [A0A0H3C884_CAUCN]	hdaA	0.920962	0.927784	0.87654	1.29761	1.30768	1.32289	0.880297	0.854558	0.884506	0.801677	1.40897	1.10332	1.03012	1.05068	0.980886	1.07115
A0A0H3C885	Conserved membrane spanning protein OS=Caulobacter crescentus (strain NA1000 / CB15N) GN=CCNA_01502 PE=4 SV=1 - [A0A0H3C885_CAUCN]	CCNA_01502	0.980691	1.02237	1.00322	1.06233	1.10847	1.11147	0.960187	0.965198	0.931611	0.932296	1.08325	0.999265	0.994809	0.977546	0.955794	1.02276
A0A0H3C890	Cystine-binding protein OS=Caulobacter crescentus (strain NA1000 / CB15N) GN=CCNA_01508 PE=3 SV=1 - [A0A0H3C890_CAUCN]	CCNA_01508	1.07114	1.0359	1.01674	1.02766	1.03118	1.05215	0.980292	0.960997	0.938391	0.948596	0.959414	0.989242	1.02008	1.05351	0.976729	1.07861
A0A0H3C893	Acetyltransferase component of pyruvate dehydrogenase complex OS=Caulobacter crescentus (strain NA1000 / CB15N) GN=CCNA_01803 PE=3 SV=1 - [A0A0H3C893_CAUCN]	CCNA_01803	1.14058	1.05258	1.08775	0.923955	0.926464	0.901257	1.12733	1.05004	0.966258	0.943201	0.810074	1.02445	1.0736	1.04857	1.02519	1.02281
A0A0H3C895	Long-chain-fatty-acid--CoA ligase OS=Caulobacter crescentus (strain NA1000 / CB15N) GN=CCNA_00970 PE=4 SV=1 - [A0A0H3C895_CAUCN]	CCNA_00970	1.07462	1.08931	1.07029	0.995084	1.01442	0.99451	0.858101	0.940054	1.0338	0.889739	0.92599	1.16191	0.912821	1.00404	1.00058	1.00346
A0A0H3C896	DEAD-box RNA helicase-like protein OS=Caulobacter crescentus (strain NA1000 / CB15N) GN=CCNA_01546 PE=3 SV=1 - [A0A0H3C896_CAUCN]	CCNA_01546	1.01544	1.00152	1.03528	0.91448	0.91233	0.904584	1.08177	1.14154	0.99619	1.0625	0.900572	0.937593	0.947644	0.980842	1.01094	0.970228
A0A0H3C897	Lysophospholipase L2 OS=Caulobacter crescentus (strain NA1000 / CB15N) GN=CCNA_01808 PE=4 SV=1 - [A0A0H3C897_CAUCN]	CCNA_01808											#DIV/0!	#DIV/0!	#DIV/0!	#DIV/0!	#DIV/0!	#DIV/0!
A0A0H3C898	Universal stress protein family OS=Caulobacter crescentus (strain NA1000 / CB15N) GN=CCNA_01519 PE=4 SV=1 - [A0A0H3C898_CAUCN]	CCNA_01519	0.819484	1.30243	1.23828	0.967387	1.25354	1.23872	0.725461	0.850639	0.90523	0.780642	1.18048	1.1596	0.852843	0.661791	0.780954	0.847414
A0A0H3C899	Polar localization protein TipN OS=Caulobacter crescentus (strain NA1000 / CB15N) GN=tipN PE=1 SV=1 - [A0A0H3C899_CAUCN]	tipN	1.04841	1.01834	1.00435	0.930546	0.950859	0.922445	1.04259	1.08534	0.988778	1.03355	0.88758	0.956683	0.960617	1.04386	1.00878	1.03478
A0A0H3C8A0	FlbA protein OS=Caulobacter crescentus (strain NA1000 / CB15N) GN=flbA PE=4 SV=1 - [A0A0H3C8A0_CAUCN]	flbA	1.08182	1.08837	1.10759	0.905296	0.913385	0.852818	1.033	0.95226	1.01311	1.05425	0.836829	0.960976	1.08479	0.976731	1.06153	0.920112
A0A0H3C8A1	Nitrogen assimilation regulatory protein NtrC OS=Caulobacter crescentus (strain NA1000 / CB15N) GN=ntrC PE=4 SV=1 - [A0A0H3C8A1_CAUCN]	ntrC	0.978808	1.07785	1.02329	1.01259	0.968965	0.959218	1.04048	1.03364	0.968921	1.00314	1.03451	0.965883	1.00662	0.956528	1.05564	0.906116
A0A0H3C8A2	2-deoxy-D-gluconate 3-dehydrogenase OS=Caulobacter crescentus (strain NA1000 / CB15N) GN=CCNA_01559 PE=4 SV=1 - [A0A0H3C8A2_CAUCN]	CCNA_01559	0.928513	0.974469	0.951916	0.971104	1.01024	0.994117	1.05046	1.02311	1.05488	1.12307	1.04587	0.939286	1.02673	0.975416	0.976851	0.998531
A0A0H3C8A3	MazG protein OS=Caulobacter crescentus (strain NA1000 / CB15N) GN=CCNA_01821 PE=4 SV=1 - [A0A0H3C8A3_CAUCN]	CCNA_01821	0.977719	1.0267	1.05123	1.03523	1.03231	1.00503	0.954601	1.01338	0.980615	1.01022	1.05882	0.970699	0.941997	0.930072	1.03005	0.902941
A0A0H3C8A4	Flagellin OS=Caulobacter crescentus (strain NA1000 / CB15N) GN=fljJ PE=3 SV=1 - [A0A0H3C8A4_CAUCN]	fljJ	1.29873	0.981984	0.984038	0.891371	0.785988	0.681024	1.12274	1.03583	1.09447	1.10364	0.686339	0.991691	1.08391	1.3198	1.30887	1.00835
A0A0H3C8A5	Uncharacterized protein OS=Caulobacter crescentus (strain NA1000 / CB15N) GN=CCNA_01566 PE=4 SV=1 - [A0A0H3C8A5_CAUCN]	CCNA_01566	1.00932	0.980976	1.04244	1.01043	0.993911	1.05177	0.991239	1.0169	1.03433	0.891829	1.0011	1.15978	0.974769	0.968225	0.960699	1.00783
A0A0H3C8A6	Cobyric acid synthase OS=Caulobacter crescentus (strain NA1000 / CB15N) GN=cobQ PE=3 SV=1 - [A0A0H3C8A6_CAUCN]	cobQ	0.895829	0.968829	0.963172	1.00948	0.973157	1.0153	1.00694	1.06661	1.01759	1.03973	1.12687	0.978709	0.944059	0.930083	0.994267	0.935445
A0A0H3C8A7	Single-stranded DNA-binding protein OS=Caulobacter crescentus (strain NA1000 / CB15N) GN=CCNA_01535 PE=3 SV=1 - [A0A0H3C8A7_CAUCN]	CCNA_01535	0.941082	0.948571	0.948889	1.15409	1.17105	1.20479	0.956193	0.845383	0.998928	0.857209	1.22634	1.16533	1.13108	0.991772	0.957918	1.03534
A0A0H3C8A8	Arsenate reductase OS=Caulobacter crescentus (strain NA1000 / CB15N) GN=CCNA_01571 PE=3 SV=1 - [A0A0H3C8A8_CAUCN]	CCNA_01571	1.01031	1.01873	1.00901	1.00737	1.02269	0.978587	1.00061	1.08637	1.00139	1.00683	0.997091	0.994601	0.921056	1.00129	1.02941	0.972676
A0A0H3C8A9	Beta-glucosidase OS=Caulobacter crescentus (strain NA1000 / CB15N) GN=CCNA_01832 PE=4 SV=1 - [A0A0H3C8A9_CAUCN]	CCNA_01832	1.10439	1.20727	1.09875	0.913267	0.902221	0.904873	1.10203	1.19137	0.79413	0.769161	0.826942	1.03246	0.925012	1.00513	1.00928	0.995894
A0A0H3C8B0	LysR-family transcriptional regulator OS=Caulobacter crescentus (strain NA1000 / CB15N) GN=CCNA_01541 PE=4 SV=1 - [A0A0H3C8B0_CAUCN]	CCNA_01541	1.08343	1.05826	1.02819	0.981089	0.892589	1.07832	0.921462	1.00113	0.998508	0.981896	0.905542	1.01692	0.920421	1.05372	0.909832	1.15815
A0A0H3C8B2	6-phosphogluconolactonase OS=Caulobacter crescentus (strain NA1000 / CB15N) GN=pgl PE=4 SV=1 - [A0A0H3C8B2_CAUCN]	pgl	1.01072	0.934862	0.964457	0.917299	0.88136	0.913575	1.39489	1.44836	0.957923	0.882189	0.907569	1.08585	0.963083	1.04797	1.00408	1.04371
A0A0H3C8B4	Protease 4 OS=Caulobacter crescentus (strain NA1000 / CB15N) GN=sppA PE=3 SV=1 - [A0A0H3C8B4_CAUCN]	sppA	1.08284	1.02646	1.05107	1.01126	1.02735	0.926115	1.01042	0.988938	0.963998	1.01052	0.933898	0.95396	1.02172	1.03022	1.09194	0.943483
A0A0H3C8B7	Uncharacterized protein OS=Caulobacter crescentus (strain NA1000 / CB15N) GN=CCNA_01581 PE=4 SV=1 - [A0A0H3C8B7_CAUCN]	CCNA_01581	0.870915	0.736004	1.29464	0.978881	1.15769	1.26403	0.98942	0.893629	1.10551	0.811241	1.12397	1.36273	1.10719	0.672706	0.774413	0.868665
A0A0H3C8B9	Quinol cytochrome oxidase polypeptide III OS=Caulobacter crescentus (strain NA1000 / CB15N) GN=qoxC PE=3 SV=1 - [A0A0H3C8B9_CAUCN]	qoxC	0.944028	0.936675	0.986271	0.928283	0.921464	0.958615	1.12912	1.07454	1.06167	1.17041	0.983322	0.90709	1.0508	0.95717	0.968359	0.988445
A0A0H3C8C3	SN-glycerol-3-phosphate transport ATP-binding protein OS=Caulobacter crescentus (strain NA1000 / CB15N) GN=CCNA_01592 PE=4 SV=1 - [A0A0H3C8C3_CAUCN]	CCNA_01592	1.1006	1.06974	1.05329	0.968997	0.912353	0.976115	0.853449	0.933621	1.04329	1.04748	0.880425	0.995999	0.914128	1.04492	0.992708	1.05259
A0A0H3C8C4	GntR-family transcriptional regulator OS=Caulobacter crescentus (strain NA1000 / CB15N) GN=CCNA_01854 PE=4 SV=1 - [A0A0H3C8C4_CAUCN]	CCNA_01854	0.559302	0.381356	0.266675	1.41038	1.52057	1.6301	0.343097	0.316176	1.71395	1.59869	2.52168	1.0721	1.08515	2.09732	0.865208	2.42406
A0A0H3C8C5	GCN5-related N-acetyltransferase OS=Caulobacter crescentus (strain NA1000 / CB15N) GN=CCNA_02154 PE=4 SV=1 - [A0A0H3C8C5_CAUCN]	CCNA_02154	0.934561	0.952392	0.987195	1.05688	1.05247	1.02302	0.914078	1.16706	1.05694	0.963999	1.13088	1.09642	0.78323	0.946684	1.03309	0.91636
A0A0H3C8C6	RHH DNA-binding protein OS=Caulobacter crescentus (strain NA1000 / CB15N) GN=CCNA_01597 PE=4 SV=1 - [A0A0H3C8C6_CAUCN]	CCNA_01597	0.912554	0.919883	0.966405	0.914328	0.967871	0.862192	0.978978	1.04869	1.29842	1.17119	1.00194	1.10863	0.933521	0.944277	1.06047	0.890433
A0A0H3C8C7	Nodulation protein N OS=Caulobacter crescentus (strain NA1000 / CB15N) GN=CCNA_00991 PE=4 SV=1 - [A0A0H3C8C7_CAUCN]	CCNA_00991	0.983563	0.881845	0.999402	1.095	1.0808	1.012	0.918466	0.948025	1.09159	1.01169	1.11329	1.07897	0.968821	0.984152	1.08201	0.909561
A0A0H3C8C8	TonB-dependent receptor OS=Caulobacter crescentus (strain NA1000 / CB15N) GN=CCNA_01859 PE=4 SV=1 - [A0A0H3C8C8_CAUCN]	CCNA_01859	1.05743	1.07938	1.05005	0.730534	0.725515	0.693494	1.05855	1.09059	1.08666	1.42411	0.69086	0.763046	0.970613	1.00702	1.05341	0.955962
A0A0H3C8D0	Glutathione S-transferase OS=Caulobacter crescentus (strain NA1000 / CB15N) GN=CCNA_01602 PE=3 SV=1 - [A0A0H3C8D0_CAUCN]	CCNA_01602	1.03061	1.03547	1.01556	0.986216	1.04823	1.04399	0.991739	1.02759	0.9461	0.949213	0.956924	0.99672	0.965114	1.01482	0.944664	1.07427
A0A0H3C8D1	Enoyl-CoA hydratase OS=Caulobacter crescentus (strain NA1000 / CB15N) GN=CCNA_00996 PE=4 SV=1 - [A0A0H3C8D1_CAUCN]	CCNA_00996	0.967403	1.09887	0.980779	0.947149	1.04348	0.959729	0.834152	1.11161	1.07811	1.03811	0.979063	1.03854	0.750402	0.986362	0.986891	0.999464
A0A0H3C8D2	TetR-family transcriptional regulator OS=Caulobacter crescentus (strain NA1000 / CB15N) GN=CCNA_01864 PE=4 SV=1 - [A0A0H3C8D2_CAUCN]	CCNA_01864	1.03913	0.973994	1.0636	0.955229	1.01984	0.975317	1.04595	1.0432	0.961507	1.00062	0.919259	0.960913	1.00264	0.976993	0.979404	0.997538
A0A0H3C8D3	Lysophospholipase OS=Caulobacter crescentus (strain NA1000 / CB15N) GN=CCNA_02165 PE=4 SV=1 - [A0A0H3C8D3_CAUCN]	CCNA_02165	0.892807	0.953976	0.891218	0.970856	1.11941	0.915499	0.957377	1.12337	1.16307	1.1186	1.08742	1.03975	0.852236	1.00178	1.06047	0.944663
A0A0H3C8D5	SNARE associated protein family OS=Caulobacter crescentus (strain NA1000 / CB15N) GN=CCNA_01607 PE=4 SV=1 - [A0A0H3C8D5_CAUCN]	CCNA_01607	0.957109	0.952102	0.974285	0.903426	0.956576	0.937502	1.23192	1.06197	1.11213	1.0539	0.943911	1.05525	1.16003	0.982371	0.963652	1.01943
A0A0H3C8D6	Ribokinase OS=Caulobacter crescentus (strain NA1000 / CB15N) GN=rbsK PE=3 SV=1 - [A0A0H3C8D6_CAUCN]	rbsK	1.07911	1.11204	1.07178	0.868068	0.936132	0.788915	1.07256	1.0429	1.03722	1.03761	0.804433	0.999623	1.02844	1.00683	1.10033	0.915026
A0A0H3C8D7	NagC-family transcriptional regulator OS=Caulobacter crescentus (strain NA1000 / CB15N) GN=CCNA_01870 PE=4 SV=1 - [A0A0H3C8D7_CAUCN]	CCNA_01870											#DIV/0!	#DIV/0!	#DIV/0!	#DIV/0!	#DIV/0!	#DIV/0!
A0A0H3C8D8	Nucleoside permease nupC OS=Caulobacter crescentus (strain NA1000 / CB15N) GN=CCNA_02171 PE=4 SV=1 - [A0A0H3C8D8_CAUCN]	CCNA_02171	1.03754	1.05296	1.11552	0.984464	0.98952	0.957425	1.06128	1.00741	0.876766	0.947787	0.948847	0.925067	1.05347	0.930095	1.02824	0.904549
A0A0H3C8D9	Undecaprenyl-phosphate beta-N-acetyl-D-fucosaminephosphotransferase OS=Caulobacter crescentus (strain NA1000 / CB15N) GN=CCNA_01553 PE=4 SV=1 - [A0A0H3C8D9_CAUCN]	CCNA_01553	0.995669	1.03213	0.994168	0.924954	0.884744	1.02173	1.03955	1.1759	0.97649	1.07806	0.928978	0.905786	0.884051	1.00151	0.905279	1.1063
A0A0H3C8E2	Phosphoenolpyruvate carboxylase OS=Caulobacter crescentus (strain NA1000 / CB15N) GN=ppc PE=3 SV=1 - [A0A0H3C8E2_CAUCN]	ppc	1.01426	1.00705	0.998247	0.93583	0.930932	0.921335	1.12298	0.972842	1.00443	1.10964	0.922677	0.905187	1.15433	1.01604	1.01573	1.0003
A0A0H3C8E4	Acyl-CoA thioesterase II OS=Caulobacter crescentus (strain NA1000 / CB15N) GN=CCNA_01877 PE=4 SV=1 - [A0A0H3C8E4_CAUCN]	CCNA_01877	0.956385	1.03696	1.02774	1.08342	1.00053	1.10033	0.945831	0.844469	1.08135	0.92379	1.13282	1.17056	1.12003	0.930567	0.984625	0.945098
A0A0H3C8E5	NYN domain protein OS=Caulobacter crescentus (strain NA1000 / CB15N) GN=CCNA_01619 PE=4 SV=1 - [A0A0H3C8E5_CAUCN]	CCNA_01619	0.842272	0.878785	0.878025	0.93597	0.963197	1.00147	1.09597	1.22043	1.16886	1.17906	1.11124	0.991347	0.898017	0.959281	0.934592	1.02642
A0A0H3C8E6	Proline iminopeptidase OS=Caulobacter crescentus (strain NA1000 / CB15N) GN=CCNA_01567 PE=3 SV=1 - [A0A0H3C8E6_CAUCN]	CCNA_01567	0.960535	0.958084	0.962975	1.13709	1.20313	1.14049	0.933472	0.890153	0.943813	0.878312	1.18381	1.07458	1.04866	0.997466	0.997024	1.00044
A0A0H3C8E7	Cys-tRNA(Pro)/Cys-tRNA(Cys) deacylase OS=Caulobacter crescentus (strain NA1000 / CB15N) GN=CCNA_01014 PE=3 SV=1 - [A0A0H3C8E7_CAUCN]	CCNA_01014	1.03072	1.03161	1.21202	0.868471	0.930363	0.891986	1.02761	1.10236	1.03069	0.961082	0.842587	1.07243	0.932193	0.850416	0.973637	0.873442
A0A0H3C8E9	Phosphatase/phosphohexomutase family protein OS=Caulobacter crescentus (strain NA1000 / CB15N) GN=CCNA_02181 PE=4 SV=1 - [A0A0H3C8E9_CAUCN]	CCNA_02181	0.903884	0.996054	0.940758	1.01662	0.996302	0.999774	0.994168	0.991184	1.13314	1.06938	1.12473	1.05961	1.00301	0.960804	1.01685	0.94488
A0A0H3C8F1	Beta-glucosidase OS=Caulobacter crescentus (strain NA1000 / CB15N) GN=CCNA_01019 PE=4 SV=1 - [A0A0H3C8F1_CAUCN]	CCNA_01019	1.08209	1.14869	1.11071	0.896043	0.901554	0.900941	1.5566	1.08524	0.836387	0.693793	0.828064	1.20553	1.43434	0.974236	0.994564	0.979562
A0A0H3C8F2	Adapter for ClpXP proteolysis of tmRNA-tagged proteins SspB OS=Caulobacter crescentus (strain NA1000 / CB15N) GN=sspB PE=4 SV=1 - [A0A0H3C8F2_CAUCN]	sspB	1.02132	1.03142	1.07336	0.969469	0.976598	0.95193	1.00161	0.988568	1.00026	0.936701	0.949227	1.06785	1.01319	0.951519	1.01842	0.934306
A0A0H3C8F4	IclR family HTH transcriptional regulator OS=Caulobacter crescentus (strain NA1000 / CB15N) GN=CCNA_01888 PE=4 SV=1 - [A0A0H3C8F4_CAUCN]	CCNA_01888											#DIV/0!	#DIV/0!	#DIV/0!	#DIV/0!	#DIV/0!	#DIV/0!
A0A0H3C8F5	DNA topoisomerase 4 subunit A OS=Caulobacter crescentus (strain NA1000 / CB15N) GN=parC PE=3 SV=1 - [A0A0H3C8F5_CAUCN]	parC	0.973228	0.977247	0.968794	1.16066	1.11072	1.15893	0.977776	0.977968	0.925792	0.883663	1.19259	1.04768	0.999804	1.00458	1.00149	1.00308
A0A0H3C8F8	Endodeoxyribonuclease RusA OS=Caulobacter crescentus (strain NA1000 / CB15N) GN=rusA PE=4 SV=1 - [A0A0H3C8F8_CAUCN]	rusA	0.788572	0.905043	0.984343	0.988568	0.985119	1.18119	1.0277	1.04877	1.26489	0.955071	1.25362	1.32439	0.979906	0.801115	0.836924	0.957213
A0A0H3C8F9	Uncharacterized protein OS=Caulobacter crescentus (strain NA1000 / CB15N) GN=CCNA_01024 PE=4 SV=1 - [A0A0H3C8F9_CAUCN]	CCNA_01024	0.808152	0.847625	0.875821	1.19277	1.21058	1.26949	0.918994	0.784324	1.17342	0.929493	1.47592	1.26243	1.1717	0.922736	0.939567	0.982087
A0A0H3C8G0	Gluconate 5-dehydrogenase OS=Caulobacter crescentus (strain NA1000 / CB15N) GN=CCNA_01642 PE=4 SV=1 - [A0A0H3C8G0_CAUCN]	CCNA_01642	0.995718	0.977814	0.963913	1.06934	1.03139	1.02881	0.941997	0.927375	1.04005	1.03447	1.07394	1.0054	1.01577	1.033	1.0394	0.993842
A0A0H3C8G2	Mg-dependent Dnase TatD OS=Caulobacter crescentus (strain NA1000 / CB15N) GN=CCNA_01898 PE=4 SV=1 - [A0A0H3C8G2_CAUCN]	CCNA_01898	0.9294	0.986517	0.949996	0.998196	0.971399	0.99574	1.08441	1.05914	0.979383	1.04956	1.07402	0.933138	1.02386	0.97832	1.00247	0.975914
A0A0H3C8G4	Alpha-L-rhamnosidase OS=Caulobacter crescentus (strain NA1000 / CB15N) GN=CCNA_01029 PE=4 SV=1 - [A0A0H3C8G4_CAUCN]	CCNA_01029	0.996471	1.10191	1.06077	0.959452	1.02595	0.917258	0.995412	0.982149	0.965683	1.01837	0.96285	0.948267	1.0135	0.939383	1.046	0.898071
A0A0H3C8G5	Superoxide dismutase [Cu-Zn] OS=Caulobacter crescentus (strain NA1000 / CB15N) GN=CCNA_01650 PE=3 SV=1 - [A0A0H3C8G5_CAUCN]	CCNA_01650	1.04776	1.03117	1.00123	1.06748	1.08782	1.01195	0.883811	0.948532	0.972098	1.02767	1.01883	0.945922	0.931767	1.04647	1.05488	0.992031
A0A0H3C8G6	Uncharacterized protein OS=Caulobacter crescentus (strain NA1000 / CB15N) GN=CCNA_01587 PE=4 SV=1 - [A0A0H3C8G6_CAUCN]	CCNA_01587											#DIV/0!	#DIV/0!	#DIV/0!	#DIV/0!	#DIV/0!	#DIV/0!
A0A0H3C8G9	TonB-dependent outer membrane receptor OS=Caulobacter crescentus (strain NA1000 / CB15N) GN=CCNA_01034 PE=3 SV=1 - [A0A0H3C8G9_CAUCN]	CCNA_01034	1.1988	1.24305	1.19567	0.846737	0.83963	0.819464	1.0421	1.15155	0.810102	0.918903	0.70632	0.881596	0.904954	1.00262	1.03328	0.970321
A0A0H3C8H0	Xaa-pro aminopeptidase OS=Caulobacter crescentus (strain NA1000 / CB15N) GN=CCNA_01593 PE=4 SV=1 - [A0A0H3C8H0_CAUCN]	CCNA_01593	0.984665	0.938411	0.997842	1.05274	1.02259	1.02861	1.02477	1.04946	0.997515	1.05678	1.06914	0.943922	0.976471	0.986795	1.02346	0.964175
A0A0H3C8H2	Thymidylate synthase OS=Caulobacter crescentus (strain NA1000 / CB15N) GN=thyA PE=3 SV=1 - [A0A0H3C8H2_CAUCN]	thyA	0.861824	0.851092	0.925584	1.32839	1.33653	1.35521	0.793744	0.860375	0.850104	0.832595	1.54137	1.02103	0.922556	0.931114	0.98021	0.949913
A0A0H3C8H5	Osmosensitive K+ channel histidine kinase kdpD OS=Caulobacter crescentus (strain NA1000 / CB15N) GN=kdpD PE=4 SV=1 - [A0A0H3C8H5_CAUCN]	kdpD	0.968728	0.981352	0.977713	1.12841	1.0621	1.04809	0.921287	1.04269	0.948793	0.988706	1.16484	0.959631	0.883569	0.99081	1.07664	0.920282
A0A0H3C8H7	Old yellow enzyme (OYE)-family NADH:flavin oxidoreductase OS=Caulobacter crescentus (strain NA1000 / CB15N) GN=CCNA_02213 PE=4 SV=1 - [A0A0H3C8H7_CAUCN]	CCNA_02213	0.740285	0.719212	0.71398	1.20785	1.12574	1.2096	0.881922	0.792954	1.488	1.16107	1.63161	1.28158	1.1122	1.03684	0.998555	1.03834
A0A0H3C8I0	Aminotransferase OS=Caulobacter crescentus (strain NA1000 / CB15N) GN=CCNA_01603 PE=3 SV=1 - [A0A0H3C8I0_CAUCN]	CCNA_01603	1.00206	0.976777	0.988409	1.07058	1.03446	1.06074	1.06089	1.076	0.916698	0.960757	1.06838	0.954141	0.985954	1.01381	1.00928	1.00449
A0A0H3C8I1	Diguanylate receptor protein dgrA OS=Caulobacter crescentus (strain NA1000 / CB15N) GN=dgrA PE=4 SV=1 - [A0A0H3C8I1_CAUCN]	dgrA	1.00108	0.981802	1.01595	1.0226	0.995984	0.955291	1.0284	0.990758	1.06395	0.988771	1.02149	1.07603	1.038	0.985364	1.07046	0.920508
A0A0H3C8I2	DnaJ-like protein djlA OS=Caulobacter crescentus (strain NA1000 / CB15N) GN=CCNA_02218 PE=4 SV=1 - [A0A0H3C8I2_CAUCN]	CCNA_02218	1.0132	1.00327	1.03062	1.02144	1.06864	1.11979	1.0064	0.972712	0.932784	0.920522	1.00814	1.01332	1.03463	0.98309	0.912168	1.07775
A0A0H3C8I4	Cyclic di-GMP effector protein PopA OS=Caulobacter crescentus (strain NA1000 / CB15N) GN=popA PE=4 SV=1 - [A0A0H3C8I4_CAUCN]	popA	0.947993	0.941855	0.972684	1.09492	1.09763	1.11423	0.991263	0.954076	1.01404	0.88668	1.15498	1.14364	1.03898	0.974616	0.982669	0.991805
A0A0H3C8I5	TetR-family transcriptional regulator OS=Caulobacter crescentus (strain NA1000 / CB15N) GN=CCNA_01608 PE=4 SV=1 - [A0A0H3C8I5_CAUCN]	CCNA_01608	0.841909	0.939151	1.02302	0.988509	1.08608	1.116	1.11811	1.20279	1.01431	0.904146	1.17413	1.12184	0.929599	0.822962	0.885762	0.929101
A0A0H3C8I6	Uncharacterized protein OS=Caulobacter crescentus (strain NA1000 / CB15N) GN=CCNA_01676 PE=4 SV=1 - [A0A0H3C8I6_CAUCN]	CCNA_01676	1.00889	0.977978	1.02709	1.00055	1.01583	1.04874	1.00758	1.01556	0.953037	0.971213	0.991732	0.981285	0.992146	0.982276	0.95405	1.02959
A0A0H3C8I8	Beta-lactamase, type II OS=Caulobacter crescentus (strain NA1000 / CB15N) GN=CCNA_02223 PE=4 SV=1 - [A0A0H3C8I8_CAUCN]	CCNA_02223	1.14824	1.04276	1.12839	0.877013	0.963537	0.918064	0.971028	1.04733	1.03134	0.915563	0.763788	1.12645	0.927143	1.01759	0.955285	1.06522
A0A0H3C8I9	ATP-dependent RNA helicase OS=Caulobacter crescentus (strain NA1000 / CB15N) GN=CCNA_01923 PE=3 SV=1 - [A0A0H3C8I9_CAUCN]	CCNA_01923	1.08372	1.05055	1.03961	0.860828	0.873443	0.853587	1.06902	1.10225	1.06508	1.07084	0.794326	0.994623	0.969848	1.04243	1.00848	1.03366
A0A0H3C8J0	Cell elongation specific D,D-transpeptidase OS=Caulobacter crescentus (strain NA1000 / CB15N) GN=CCNA_01615 PE=4 SV=1 - [A0A0H3C8J0_CAUCN]	CCNA_01615	0.953324	0.95754	0.98861	1.0984	1.10342	1.00626	0.913795	1.015	1.03609	0.983242	1.15218	1.05375	0.900288	0.964307	1.09157	0.883411
A0A0H3C8J1	S-layer protein rsaA OS=Caulobacter crescentus (strain NA1000 / CB15N) GN=rsaA PE=4 SV=1 - [A0A0H3C8J1_CAUCN]	rsaA	1.01118	1.06377	1.00792	1.02592	1.04013	1.04043	0.948801	0.987955	0.950939	0.945513	1.01458	1.00574	0.960369	1.00323	0.986055	1.01741
A0A0H3C8J4	2-amino-4-hydroxy-6-hydroxymethyldihydropteridine pyrophosphokinase OS=Caulobacter crescentus (strain NA1000 / CB15N) GN=CCNA_01620 PE=4 SV=1 - [A0A0H3C8J4_CAUCN]	CCNA_01620	1.04157	1.17598	1.10343	1.00985	0.840946	0.764896	0.787983	0.893	1.18201	1.07852	0.969546	1.09595	0.8824	0.943937	1.32024	0.714973
A0A0H3C8J5	Perosamine synthetase OS=Caulobacter crescentus (strain NA1000 / CB15N) GN=CCNA_01064 PE=3 SV=1 - [A0A0H3C8J5_CAUCN]	CCNA_01064	0.957494	0.953549	1.00051	1.07158	0.994778	0.971012	1.00829	1.08097	1.00114	1.0139	1.11915	0.98742	0.932768	0.957011	1.10357	0.867197
A0A0H3C8J6	Conserved ACT domain protein OS=Caulobacter crescentus (strain NA1000 / CB15N) GN=CCNA_01928 PE=4 SV=1 - [A0A0H3C8J6_CAUCN]	CCNA_01928	1.15476	0.974985	0.955204	1.06998	1.05851	1.07773	0.975521	0.926741	0.95531	0.882684	0.926581	1.08228	1.05264	1.20891	0.992803	1.21768
A0A0H3C8J7	Exopolyphosphatase GppA OS=Caulobacter crescentus (strain NA1000 / CB15N) GN=CCNA_01686 PE=4 SV=1 - [A0A0H3C8J7_CAUCN]	CCNA_01686	0.942076	1.00629	1.01308	1.00092	1.01307	0.998531	0.971767	1.02469	1.07846	0.989881	1.06246	1.08949	0.948351	0.92991	1.00239	0.927689
A0A0H3C8J9	Methyltransferase OS=Caulobacter crescentus (strain NA1000 / CB15N) GN=CCNA_01069 PE=4 SV=1 - [A0A0H3C8J9_CAUCN]	CCNA_01069	1.01014	1.06025	1.07084	1.00962	1.04414	0.96402	0.972753	0.964641	0.986448	0.913678	0.999493	1.07965	1.00841	0.943309	1.04731	0.900701
A0A0H3C8K1	Signal peptidase I OS=Caulobacter crescentus (strain NA1000 / CB15N) GN=CCNA_01629 PE=3 SV=1 - [A0A0H3C8K1_CAUCN]	CCNA_01629	0.936014	0.923188	0.991612	1.0849	1.02454	1.08032	1.01704	1.05381	0.974193	0.971921	1.15906	1.00234	0.96511	0.943932	1.00423	0.939955
A0A0H3C8K3	tRNA/rRNA methyltransferase OS=Caulobacter crescentus (strain NA1000 / CB15N) GN=CCNA_01691 PE=4 SV=1 - [A0A0H3C8K3_CAUCN]	CCNA_01691	0.935418	0.955672	0.967748	0.95236	1.05933	0.957508	1.07318	1.06838	1.07804	1.0885	1.01811	0.990388	1.00449	0.966592	0.994623	0.971817
A0A0H3C8K5	D-alanyl-D-alanine serine-type carboxypeptidase OS=Caulobacter crescentus (strain NA1000 / CB15N) GN=CCNA_02243 PE=3 SV=1 - [A0A0H3C8K5_CAUCN]	CCNA_02243	1.04074	0.962867	0.892773	1.09806	0.952078	0.94452	1.07352	1.04204	1.0618	0.998964	1.05507	1.06291	1.03021	1.16574	1.16256	1.00274
A0A0H3C8K6	Beta-lactamase family protein OS=Caulobacter crescentus (strain NA1000 / CB15N) GN=CCNA_01638 PE=4 SV=1 - [A0A0H3C8K6_CAUCN]	CCNA_01638	0.98233	0.988299	0.945752	1.1216	1.0512	1.09162	0.988929	0.954165	1.01006	0.941071	1.14178	1.07331	1.03643	1.03868	1.02747	1.01091
A0A0H3C8K7	ATP-dependent transporter SufC OS=Caulobacter crescentus (strain NA1000 / CB15N) GN=sufC PE=4 SV=1 - [A0A0H3C8K7_CAUCN]	sufC	0.936797	0.972845	0.986599	1.0707	0.994872	1.07072	0.990023	1.04485	1.04048	0.979346	1.14294	1.06242	0.947528	0.949521	0.999984	0.949537
A0A0H3C8K8	Uncharacterized protein OS=Caulobacter crescentus (strain NA1000 / CB15N) GN=CCNA_01079 PE=4 SV=1 - [A0A0H3C8K8_CAUCN]	CCNA_01079	0.742767	0.900257	0.755264	1.28542	1.29037	1.04148	1.03394	0.926062	1.01036	1.12513	1.73058	0.897999	1.11649	0.983455	1.23422	0.796823
A0A0H3C8L1	Chemotaxis motB protein OS=Caulobacter crescentus (strain NA1000 / CB15N) GN=CCNA_01644 PE=4 SV=1 - [A0A0H3C8L1_CAUCN]	CCNA_01644	1.08578	1.11858	1.08323	1.02886	1.01122	0.971139	0.944253	0.915953	0.879239	0.89736	0.947574	0.979807	1.0309	1.00236	1.05943	0.946126
A0A0H3C8L2	Alpha/beta hydrolase family protein OS=Caulobacter crescentus (strain NA1000 / CB15N) GN=CCNA_01943 PE=4 SV=1 - [A0A0H3C8L2_CAUCN]	CCNA_01943	1.0568	1.00634	1.08834	0.935114	0.949612	0.998535	1.0085	1.0115	0.980741	1.02686	0.884851	0.955091	0.997033	0.971024	0.936486	1.03688
A0A0H3C8L3	Uncharacterized protein OS=Caulobacter crescentus (strain NA1000 / CB15N) GN=CCNA_01084 PE=4 SV=1 - [A0A0H3C8L3_CAUCN]	CCNA_01084	1.09059	1.15404	1.12404	0.847423	0.912696	0.837071	1.08869	0.873877	1.02005	1.03968	0.777033	0.981116	1.24582	0.970238	1.01237	0.958387
A0A0H3C8L4	DNA gyrase subunit A OS=Caulobacter crescentus (strain NA1000 / CB15N) GN=gyrA PE=3 SV=1 - [A0A0H3C8L4_CAUCN]	gyrA	0.999046	0.973621	0.982636	1.1148	1.095	1.09618	0.984031	0.983907	0.93925	0.894989	1.11587	1.04945	1.00013	1.0167	1.01699	0.999715
A0A0H3C8L7	Bactofilin A BacA OS=Caulobacter crescentus (strain NA1000 / CB15N) GN=bacA PE=4 SV=1 - [A0A0H3C8L7_CAUCN]	bacA	0.991985	1.05822	1.01502	0.977247	1.00283	1.00723	0.972381	0.953239	0.977873	1.0717	0.985143	0.912451	1.02008	0.977302	0.970231	1.00729
A0A0H3C8L8	Uncharacterized protein OS=Caulobacter crescentus (strain NA1000 / CB15N) GN=CCNA_01090 PE=4 SV=1 - [A0A0H3C8L8_CAUCN]	CCNA_01090	1.05665	1.09486	0.987353	0.931077	0.875668	0.907409	0.947081	1.0069	1.12711	1.19422	0.881161	0.943803	0.940593	1.07018	1.02608	1.04298
A0A0H3C8L9	Uncharacterized protein OS=Caulobacter crescentus (strain NA1000 / CB15N) GN=CCNA_01657 PE=4 SV=1 - [A0A0H3C8L9_CAUCN]	CCNA_01657	1.06092	0.984525	1.00881	1.08244	1.03352	0.867472	0.971346	0.988341	0.936478	1.08994	1.02029	0.8592	0.982805	1.05166	1.24782	0.8428
A0A0H3C8M0	Octanoyltransferase OS=Caulobacter crescentus (strain NA1000 / CB15N) GN=lipB PE=3 SV=1 - [A0A0H3C8M0_CAUCN]	lipB	0.950078	0.981771	0.940427	0.969067	0.989652	1.04202	0.96768	0.941159	1.16984	1.07957	1.01999	1.08361	1.02818	1.01026	0.929993	1.08631
A0A0H3C8M2	Outer membrane protein OS=Caulobacter crescentus (strain NA1000 / CB15N) GN=CCNA_01956 PE=4 SV=1 - [A0A0H3C8M2_CAUCN]	CCNA_01956	0.968049	0.998434	1.01826	0.986158	0.965909	0.978479	1.01118	0.998073	1.04676	1.03894	1.01871	1.00752	1.01313	0.950686	1.00785	0.943283
A0A0H3C8M3	Two-component response regulator kdpE OS=Caulobacter crescentus (strain NA1000 / CB15N) GN=kdpE PE=4 SV=1 - [A0A0H3C8M3_CAUCN]	kdpE	0.981203	1.06961	0.978823	1.04976	1.05421	1.02151	0.945322	1.05534	0.969231	0.948411	1.06987	1.02195	0.895749	1.00243	1.02766	0.975451
A0A0H3C8M4	Phenylalanine--tRNA ligase beta subunit OS=Caulobacter crescentus (strain NA1000 / CB15N) GN=pheT PE=3 SV=1 - [A0A0H3C8M4_CAUCN]	pheT	1.0213	0.97689	1.01374	0.936964	0.934029	0.901086	1.11506	1.11107	0.98577	1.10173	0.917424	0.894751	1.00359	1.00745	1.03982	0.968876
A0A0H3C8M5	CopY/TcrY family transcriptional repressor OS=Caulobacter crescentus (strain NA1000 / CB15N) GN=CCNA_01712 PE=4 SV=1 - [A0A0H3C8M5_CAUCN]	CCNA_01712	0.926218	0.994227	1.01978	0.9585	1.03522	1.0503	1.16936	1.21959	0.899349	0.959974	1.03485	0.936847	0.958816	0.908251	0.912594	0.995241
A0A0H3C8M7	NADH dehydrogenase OS=Caulobacter crescentus (strain NA1000 / CB15N) GN=CCNA_01964 PE=4 SV=1 - [A0A0H3C8M7_CAUCN]	CCNA_01964	1.0094	1.0661	0.96814	0.926028	1.01592	0.942805	1.05593	0.937732	1.04442	0.978048	0.917407	1.06787	1.12605	1.04262	0.982205	1.0615
A0A0H3C8M8	Transglutaminase-like enzyme OS=Caulobacter crescentus (strain NA1000 / CB15N) GN=CCNA_01672 PE=4 SV=1 - [A0A0H3C8M8_CAUCN]	CCNA_01672	0.987488	1.06016	0.943808	1.09749	1.22637	1.21153	0.874489	0.994343	0.971997	0.733961	1.1114	1.32432	0.879464	1.04628	0.905874	1.15499
A0A0H3C8M9	L-aminopeptidase/D-esterase dmpA OS=Caulobacter crescentus (strain NA1000 / CB15N) GN=CCNA_02269 PE=4 SV=1 - [A0A0H3C8M9_CAUCN]	CCNA_02269	1.07769	0.981933	1.03043	1.03905	0.944539	1.06894	1.01757	0.93046	1.01449	0.920221	0.964149	1.10244	1.09362	1.04586	0.972037	1.07595
A0A0H3C8N1	Glycosyltransferase OS=Caulobacter crescentus (strain NA1000 / CB15N) GN=CCNA_01104 PE=4 SV=1 - [A0A0H3C8N1_CAUCN]	CCNA_01104	0.985846	0.926413	0.988279	1.04722	0.922625	1.06106	1.07686	1.13506	0.938036	0.999067	1.06225	0.938912	0.948724	0.997539	0.986956	1.01072
A0A0H3C8N2	Triosephosphate isomerase OS=Caulobacter crescentus (strain NA1000 / CB15N) GN=tpiA PE=3 SV=1 - [A0A0H3C8N2_CAUCN]	tpiA	0.991824	0.943957	1.00407	0.954191	1.04164	0.982999	0.972227	0.980908	1.02515	1.07875	0.962057	0.950311	0.99115	0.987801	0.970694	1.01762
A0A0H3C8N3	Carboxypeptidase G2 OS=Caulobacter crescentus (strain NA1000 / CB15N) GN=CCNA_01677 PE=4 SV=1 - [A0A0H3C8N3_CAUCN]	CCNA_01677	1.00847	0.997193	1.03323	1.08571	1.03721	1.05743	0.970749	0.97571	0.953184	0.889795	1.0766	1.07124	0.994916	0.976034	1.02675	0.950607
A0A0H3C8N4	EF-Hand domain protein OS=Caulobacter crescentus (strain NA1000 / CB15N) GN=CCNA_02274 PE=4 SV=1 - [A0A0H3C8N4_CAUCN]	CCNA_02274	1.00623	0.998238	0.944887	0.983769	1.18345	0.916506	0.851215	1.1037	1.08606	0.997854	0.977683	1.0884	0.771238	1.06492	1.07339	0.992106
A0A0H3C8N5	Conserved hypothetical membrane protein OS=Caulobacter crescentus (strain NA1000 / CB15N) GN=CCNA_01724 PE=4 SV=1 - [A0A0H3C8N5_CAUCN]	CCNA_01724	0.976889	0.917881	0.983351	1.04151	0.972402	1.023	1.07806	1.02762	1.00877	1.02415	1.06615	0.984981	1.04908	0.993428	1.01809	0.975772
A0A0H3C8N6	Conserved hypothetical cytosolic protein OS=Caulobacter crescentus (strain NA1000 / CB15N) GN=CCNA_01109 PE=4 SV=1 - [A0A0H3C8N6_CAUCN]	CCNA_01109	1.01465	0.988567	0.980154	1.11532	1.08041	1.11357	0.942391	1.01719	0.894111	0.940607	1.09921	0.950568	0.926468	1.0352	1.00157	1.03357
A0A0H3C8N7	2-nonaprenyl-3-methyl-6-methoxy-1,4-benzoquinol hydroxylase OS=Caulobacter crescentus (strain NA1000 / CB15N) GN=coq7 PE=3 SV=1 - [A0A0H3C8N7_CAUCN]	coq7	0.931133	1.00431	0.948114	1.02478	1.09873	1.07519	1.03362	0.936281	0.99367	1.03521	1.10057	0.959877	1.10397	0.98209	0.953114	1.0304
A0A0H3C8N9	1-acyl-sn-glycerol-3-phosphate acyltransferase OS=Caulobacter crescentus (strain NA1000 / CB15N) GN=CCNA_01977 PE=4 SV=1 - [A0A0H3C8N9_CAUCN]	CCNA_01977	1.08917	1.03686	1.07804	0.90944	0.942892	0.923171	1.05107	1.05417	1.03281	1.02146	0.834981	1.01111	0.997054	1.01032	0.985127	1.02558
A0A0H3C8P2	Transcription elongation factor GreB OS=Caulobacter crescentus (strain NA1000 / CB15N) GN=greB PE=4 SV=1 - [A0A0H3C8P2_CAUCN]	greB	1.07507	1.22167	1.08285	0.843102	0.743383	0.874816	1.04272	1.13348	0.997527	1.08241	0.784228	0.921578	0.919927	0.99282	0.963747	1.03017
A0A0H3C8P3	Ribosomal RNA large subunit methyltransferase E OS=Caulobacter crescentus (strain NA1000 / CB15N) GN=rlmE PE=3 SV=1 - [A0A0H3C8P3_CAUCN]	rlmE	1.02866	0.985873	1.05255	0.947551	0.944147	1.01023	1.05822	1.00028	0.998267	0.985163	0.921151	1.0133	1.05792	0.977307	0.937953	1.04196
A0A0H3C8P5	Glutamate--tRNA ligase OS=Caulobacter crescentus (strain NA1000 / CB15N) GN=gltX PE=3 SV=1 - [A0A0H3C8P5_CAUCN]	gltX	1.03732	0.990549	1.02425	1.00028	1.00437	1.01629	0.993269	0.990604	0.945899	1.04881	0.964287	0.901882	1.00269	1.01277	0.984247	1.02898
A0A0H3C8P7	Uncharacterized protein OS=Caulobacter crescentus (strain NA1000 / CB15N) GN=CCNA_02290 PE=4 SV=1 - [A0A0H3C8P7_CAUCN]	CCNA_02290	1.02507	1.06264	1.00905	1.01455	1.10022	1.04324	0.925826	0.891335	0.994382	0.952443	0.989737	1.04403	1.0387	1.01587	0.9725	1.0446
A0A0H3C8Q0	Uncharacterized protein OS=Caulobacter crescentus (strain NA1000 / CB15N) GN=CCNA_01125 PE=4 SV=1 - [A0A0H3C8Q0_CAUCN]	CCNA_01125	1.05243	0.989757	1.07942	1.0576	1.06183	1.04499	0.963993	0.833599	0.944932	0.969413	1.00491	0.974746	1.15642	0.974994	1.01207	0.963369
A0A0H3C8Q1	UDP-2,3-diacylglucosamine pyrophosphatase LpxI OS=Caulobacter crescentus (strain NA1000 / CB15N) GN=lpxI PE=1 SV=1 - [A0A0H3C8Q1_CAUCN]	lpxI	1.02627	0.961366	1.03536	0.959682	0.95027	1.00301	1.03742	1.06305	1.00641	1.05435	0.935121	0.954524	0.975892	0.991219	0.956803	1.03597
A0A0H3C8Q2	Uncharacterized protein OS=Caulobacter crescentus (strain NA1000 / CB15N) GN=CCNA_02295 PE=4 SV=1 - [A0A0H3C8Q2_CAUCN]	CCNA_02295	1.0616	0.922932	0.977022	1.00247	0.943982	1.01577	1.06635	1.07002	1.03354	0.999472	0.944308	1.03409	0.996564	1.08656	0.986907	1.10098
A0A0H3C8Q3	3-oxoacyl-(Acyl-carrier protein) reductase OS=Caulobacter crescentus (strain NA1000 / CB15N) GN=CCNA_01747 PE=4 SV=1 - [A0A0H3C8Q3_CAUCN]	CCNA_01747	0.991893	0.99204	0.995353	1.04646	1.00021	1.0028	1.01351	0.937086	1.02059	1.02126	1.05501	0.999352	1.08156	0.996524	1.04354	0.95495
A0A0H3C8Q4	Sensory transduction histidine kinase/receiver protein CckA OS=Caulobacter crescentus (strain NA1000 / CB15N) GN=cckA PE=4 SV=1 - [A0A0H3C8Q4_CAUCN]	cckA	1.01318	0.982902	0.949082	1.0893	1.04248	1.00656	0.962387	0.980172	0.997741	0.970444	1.07513	1.02813	0.981855	1.06754	1.08221	0.986445
A0A0H3C8Q5	Isoprenyl transferase OS=Caulobacter crescentus (strain NA1000 / CB15N) GN=CCNA_01996 PE=3 SV=1 - [A0A0H3C8Q5_CAUCN]	CCNA_01996	1.06224	1.09571	1.01703	0.92452	0.894613	0.977003	1.02918	1.06936	0.966916	0.974054	0.870349	0.992672	0.962427	1.04445	0.946282	1.10374
A0A0H3C8Q6	Cell division protein FtsX OS=Caulobacter crescentus (strain NA1000 / CB15N) GN=ftsX PE=4 SV=1 - [A0A0H3C8Q6_CAUCN]	ftsX											#DIV/0!	#DIV/0!	#DIV/0!	#DIV/0!	#DIV/0!	#DIV/0!
A0A0H3C8Q7	Guanylate kinase OS=Caulobacter crescentus (strain NA1000 / CB15N) GN=gmk PE=3 SV=1 - [A0A0H3C8Q7_CAUCN]	gmk	0.982456	1.02753	0.938133	0.904666	0.976519	0.890082	1.02506	1.09772	1.15482	1.0798	0.920821	1.06948	0.933808	1.04725	1.01639	1.03036
A0A0H3C8Q8	Ribosomal-protein-alanine acetyltransferase OS=Caulobacter crescentus (strain NA1000 / CB15N) GN=CCNA_01137 PE=4 SV=1 - [A0A0H3C8Q8_CAUCN]	CCNA_01137	0.990991	1.06021	1.00788	1.02109	1.00954	1.03227	1.09692	0.939702	1.01917	0.900028	1.03038	1.13238	1.1673	0.983242	0.989169	0.994008
A0A0H3C8Q9	Chorismate mutase-family protein OS=Caulobacter crescentus (strain NA1000 / CB15N) GN=CCNA_02305 PE=4 SV=1 - [A0A0H3C8Q9_CAUCN]	CCNA_02305	1.00469	1.02409	0.92736	1.01372	1.0772	1.09972	1.00539	1.10089	0.998823	0.932948	1.00899	1.07061	0.913256	1.08339	0.921799	1.1753
A0A0H3C8R0	Lipoprotein-releasing system ATP-binding protein LolD OS=Caulobacter crescentus (strain NA1000 / CB15N) GN=lolD PE=3 SV=1 - [A0A0H3C8R0_CAUCN]	lolD	0.833807	0.913008	1.18829	0.939832	0.787632	1.20253	0.864739	0.988793	1.21764	1.08557	1.12716	1.12166	0.874539	0.701688	0.781543	0.897823
A0A0H3C8R1	4-hydroxythreonine-4-phosphate dehydrogenase OS=Caulobacter crescentus (strain NA1000 / CB15N) GN=pdxA PE=3 SV=1 - [A0A0H3C8R1_CAUCN]	pdxA											#DIV/0!	#DIV/0!	#DIV/0!	#DIV/0!	#DIV/0!	#DIV/0!
A0A0H3C8R2	Endoribonuclease L-PSP OS=Caulobacter crescentus (strain NA1000 / CB15N) GN=CCNA_01143 PE=4 SV=1 - [A0A0H3C8R2_CAUCN]	CCNA_01143											#DIV/0!	#DIV/0!	#DIV/0!	#DIV/0!	#DIV/0!	#DIV/0!
A0A0H3C8R4	Endo-1,3-1,4-beta glucanase-related protein OS=Caulobacter crescentus (strain NA1000 / CB15N) GN=CCNA_01698 PE=4 SV=1 - [A0A0H3C8R4_CAUCN]	CCNA_01698	1.20322	1.15211	1.09628	0.954205	0.927401	0.933909	0.881161	0.925237	0.991601	0.880428	0.793042	1.12627	0.952363	1.09755	1.02173	1.07421
A0A0H3C8R5	Metal-dependent hydrolase OS=Caulobacter crescentus (strain NA1000 / CB15N) GN=CCNA_02012 PE=4 SV=1 - [A0A0H3C8R5_CAUCN]	CCNA_02012	0.952813	0.967941	0.976336	1.05929	1.03243	1.02216	1.0223	1.04988	0.965662	0.982954	1.11175	0.982408	0.973726	0.975907	1.03633	0.941695
A0A0H3C8R6	Probable cytosol aminopeptidase OS=Caulobacter crescentus (strain NA1000 / CB15N) GN=pepA PE=3 SV=1 - [A0A0H3C8R6_CAUCN]	pepA	1.01318	0.976646	0.996809	1.026	1.0557	1.02439	0.973678	0.963278	0.998874	1.04922	1.01265	0.952014	1.0108	1.01642	1.00157	1.01484
A0A0H3C8R7	TonB-dependent outer membrane receptor OS=Caulobacter crescentus (strain NA1000 / CB15N) GN=CCNA_01149 PE=3 SV=1 - [A0A0H3C8R7_CAUCN]	CCNA_01149											#DIV/0!	#DIV/0!	#DIV/0!	#DIV/0!	#DIV/0!	#DIV/0!
A0A0H3C8R8	Cro/CI-family transcriptional regulator OS=Caulobacter crescentus (strain NA1000 / CB15N) GN=CCNA_02315 PE=4 SV=1 - [A0A0H3C8R8_CAUCN]	CCNA_02315	0.875999	1.10537	0.826816	1.30968	0.881435	1.08567	1.06599	0.712098	1.11361	0.982119	1.49507	1.13389	1.49696	1.05948	1.20633	0.878272
A0A0H3C8S0	NADH-quinone oxidoreductase chain L OS=Caulobacter crescentus (strain NA1000 / CB15N) GN=nuoL PE=4 SV=1 - [A0A0H3C8S0_CAUCN]	nuoL	0.968213	0.97485	0.99075	1.08112	0.976838	1.03682	1.14968	1.13421	0.941988	0.972023	1.11661	0.9691	1.01363	0.977253	1.04272	0.937213
A0A0H3C8S1	TonB-dependent outer membrane receptor OS=Caulobacter crescentus (strain NA1000 / CB15N) GN=CCNA_01155 PE=3 SV=1 - [A0A0H3C8S1_CAUCN]	CCNA_01155	1.0628	1.07235	1.0594	1.16129	1.13036	1.13996	0.860728	0.873578	0.895858	0.787995	1.09268	1.13688	0.98529	1.0032	1.01871	0.984774
A0A0H3C8S3	2'-deoxycytidine 5'-triphosphate deaminase OS=Caulobacter crescentus (strain NA1000 / CB15N) GN=CCNA_02320 PE=4 SV=1 - [A0A0H3C8S3_CAUCN]	CCNA_02320	1.02938	1.00299	1.04826	0.969485	1.03257	0.965576	1.00689	0.991956	0.989753	1.00771	0.941812	0.98218	1.01505	0.981993	1.00405	0.978034
A0A0H3C8S6	NADH-quinone oxidoreductase OS=Caulobacter crescentus (strain NA1000 / CB15N) GN=nuoG PE=3 SV=1 - [A0A0H3C8S6_CAUCN]	nuoG	1.0371	1.00655	1.01135	1.04408	1.0025	1.00835	1.06054	1.02905	0.94769	0.94826	1.00674	0.999399	1.0306	1.02546	1.03544	0.990365
A0A0H3C8S8	2'-5' RNA ligase family protein OS=Caulobacter crescentus (strain NA1000 / CB15N) GN=CCNA_01713 PE=4 SV=1 - [A0A0H3C8S8_CAUCN]	CCNA_01713	0.988733	0.899228	0.963813	1.13968	1.09711	1.12829	0.956031	1.01324	0.930594	0.965121	1.15266	0.964225	0.94354	1.02586	1.01009	1.01561
A0A0H3C8S9	Transport permease protein OS=Caulobacter crescentus (strain NA1000 / CB15N) GN=CCNA_02327 PE=3 SV=1 - [A0A0H3C8S9_CAUCN]	CCNA_02327											#DIV/0!	#DIV/0!	#DIV/0!	#DIV/0!	#DIV/0!	#DIV/0!
A0A0H3C8T1	NTF2 superfamily protein OS=Caulobacter crescentus (strain NA1000 / CB15N) GN=CCNA_02028 PE=4 SV=1 - [A0A0H3C8T1_CAUCN]	CCNA_02028	1.04824	1.03637	1.00519	1.1489	1.13509	1.19078	0.905755	0.735528	1.01309	0.757984	1.09603	1.33656	1.23144	1.04283	0.964828	1.08084
A0A0H3C8T4	Lipid A biosynthesis lauroyl acyltransferase OS=Caulobacter crescentus (strain NA1000 / CB15N) GN=CCNA_02333 PE=4 SV=1 - [A0A0H3C8T4_CAUCN]	CCNA_02333	1.0061	1.01586	1.05926	1.01874	0.995543	0.981922	1.02417	1.0282	1.00058	0.965372	1.01256	1.03647	0.996081	0.94982	1.0375	0.91549
A0A0H3C8T5	Histidine phosphotransferase ShpA OS=Caulobacter crescentus (strain NA1000 / CB15N) GN=shpA PE=4 SV=1 - [A0A0H3C8T5_CAUCN]	shpA	1.28199	1.11474	1.05133	0.973696	0.958503	0.871679	0.867428	0.846084	1.09192	0.845446	0.759518	1.29153	1.02523	1.2194	1.11704	1.09164
A0A0H3C8T6	Beta-barrel assembly machine (BAM) protein BamB OS=Caulobacter crescentus (strain NA1000 / CB15N) GN=bamB PE=4 SV=1 - [A0A0H3C8T6_CAUCN]	bamB	0.977436	1.00642	0.987977	0.958632	0.962334	0.989591	1.01188	0.983786	1.04582	1.08606	0.980763	0.962948	1.02855	0.98933	0.968716	1.02128
A0A0H3C8T7	Luciferase-like monooxygenase OS=Caulobacter crescentus (strain NA1000 / CB15N) GN=CCNA_02034 PE=4 SV=1 - [A0A0H3C8T7_CAUCN]	CCNA_02034	0.658065	0.664348	0.735822	1.16536	1.22926	1.17851	0.80139	0.749933	1.5521	1.227	1.77089	1.26495	1.06862	0.894326	0.988839	0.904421
A0A0H3C8T8	Uncharacterized protein OS=Caulobacter crescentus (strain NA1000 / CB15N) GN=CCNA_02338 PE=4 SV=1 - [A0A0H3C8T8_CAUCN]	CCNA_02338	1.00151	0.982516	1.02003	0.959392	0.922062	1.02043	0.95172	0.982338	1.11125	1.06073	0.957945	1.04763	0.968831	0.981847	0.940183	1.04431
A0A0H3C8T9	Uncharacterized protein OS=Caulobacter crescentus (strain NA1000 / CB15N) GN=CCNA_01784 PE=4 SV=1 - [A0A0H3C8T9_CAUCN]	CCNA_01784	1.07581	1.00941	1.03984	1.0218	1.10439	1.02637	0.968373	0.964017	0.933811	0.912901	0.949797	1.02291	1.00452	1.03459	0.99555	1.03922
A0A0H3C8U0	Amidophosphoribosyltransferase OS=Caulobacter crescentus (strain NA1000 / CB15N) GN=purF PE=3 SV=1 - [A0A0H3C8U0_CAUCN]	purF	0.976632	0.952158	0.981359	1.05734	1.03245	1.06467	1.02289	0.97893	0.998837	0.963352	1.08263	1.03683	1.04491	0.995183	0.993113	1.00209
A0A0H3C8U1	Uncharacterized protein OS=Caulobacter crescentus (strain NA1000 / CB15N) GN=CCNA_01176 PE=4 SV=1 - [A0A0H3C8U1_CAUCN]	CCNA_01176	1.01159	1.11471	1.06974	0.795654	0.82054	0.86403	1.20349	1.16604	0.989615	1.05372	0.786534	0.939161	1.03212	0.945649	0.920864	1.02692
A0A0H3C8U2	Uncharacterized protein OS=Caulobacter crescentus (strain NA1000 / CB15N) GN=CCNA_02343 PE=4 SV=1 - [A0A0H3C8U2_CAUCN]	CCNA_02343	1.04707	1.0335	1.01635	0.959835	1.01739	0.960213	0.944546	0.998686	0.958735	1.0957	0.916684	0.874998	0.945788	1.03023	0.999606	1.03064
A0A0H3C8U4	Nitrogen regulatory protein P-II OS=Caulobacter crescentus (strain NA1000 / CB15N) GN=glnB PE=3 SV=1 - [A0A0H3C8U4_CAUCN]	glnB	1.03309	0.981528	1.0172	1.00847	0.921236	1.03094	0.952915	1.20227	0.934445	1.03082	0.976168	0.906504	0.792599	1.01562	0.978201	1.03825
A0A0H3C8U6	Pyruvate dehydrogenase E1 component subunit alpha OS=Caulobacter crescentus (strain NA1000 / CB15N) GN=pdhA PE=4 SV=1 - [A0A0H3C8U6_CAUCN]	pdhA	1.10198	1.07165	1.09171	0.879269	0.878886	0.889921	1.12914	1.07712	0.99168	0.94905	0.797902	1.04492	1.0483	1.0094	0.98803	1.02163
A0A0H3C8U8	Imidazolonepropionase related amidohydrolase OS=Caulobacter crescentus (strain NA1000 / CB15N) GN=CCNA_02051 PE=4 SV=1 - [A0A0H3C8U8_CAUCN]	CCNA_02051	1.14599	1.11001	1.17519	0.956579	0.974111	0.933671	0.989393	0.988702	0.859162	0.829315	0.834718	1.03599	1.0007	0.975153	1.02453	0.9518
A0A0H3C8U9	Nucleoside phosphorylase OS=Caulobacter crescentus (strain NA1000 / CB15N) GN=CCNA_02349 PE=4 SV=1 - [A0A0H3C8U9_CAUCN]	CCNA_02349	1.02469	1.02644	1.05246	0.987326	1.05827	0.97143	0.945066	0.99052	1.00914	0.985956	0.963537	1.02351	0.954111	0.973612	1.01636	0.957937
A0A0H3C8V1	Glutathione peroxidase OS=Caulobacter crescentus (strain NA1000 / CB15N) GN=CCNA_01804 PE=3 SV=1 - [A0A0H3C8V1_CAUCN]	CCNA_01804	1.09203	1.11755	1.11146	0.910517	0.943802	0.920881	1.12036	1.06069	0.913629	0.899817	0.833784	1.01535	1.05626	0.982521	0.988745	0.993705
A0A0H3C8V5	Coenzyme Q-binding protein OS=Caulobacter crescentus (strain NA1000 / CB15N) GN=CCNA_01810 PE=4 SV=1 - [A0A0H3C8V5_CAUCN]	CCNA_01810	1.02384	1.08704	0.904295	0.943027	0.969739	0.907329	1.03783	1.01105	1.15313	1.01253	0.921072	1.13886	1.02648	1.13219	1.03934	1.08933
A0A0H3C8V6	Glycosyl transferase family 2 protein OS=Caulobacter crescentus (strain NA1000 / CB15N) GN=CCNA_02360 PE=4 SV=1 - [A0A0H3C8V6_CAUCN]	CCNA_02360	0.961089	0.99964	1.01982	0.984115	0.952199	0.957779	1.1419	1.06905	0.99945	1.03772	1.02396	0.96312	1.06814	0.942407	1.0275	0.917187
A0A0H3C8V7	Iron-regulated outer membrane virulence protein OS=Caulobacter crescentus (strain NA1000 / CB15N) GN=CCNA_01196 PE=3 SV=1 - [A0A0H3C8V7_CAUCN]	CCNA_01196	1.03665	1.02336	1.00647	1.01044	1.02092	1.01162	0.966386	0.976349	0.999221	0.954852	0.974721	1.04647	0.989795	1.02998	0.998831	1.03118
A0A0H3C8V9	Outer membrane protein assembly factor BamD OS=Caulobacter crescentus (strain NA1000 / CB15N) GN=bamD PE=3 SV=1 - [A0A0H3C8V9_CAUCN]	bamD	1.04813	1.00295	0.99449	0.917506	0.97013	0.958877	1.01397	0.962143	1.02674	1.11707	0.875371	0.91914	1.05387	1.05394	0.956854	1.10146
A0A0H3C8W0	Nitrogen regulation protein ntrY OS=Caulobacter crescentus (strain NA1000 / CB15N) GN=ntrY PE=4 SV=1 - [A0A0H3C8W0_CAUCN]	ntrY	0.928073	1.00436	1.10199	0.977075	1.04672	0.989902	1.0566	0.963368	0.986408	1.00411	1.0528	0.982368	1.09677	0.842179	0.987042	0.853235
A0A0H3C8W1	Uncharacterized protein OS=Caulobacter crescentus (strain NA1000 / CB15N) GN=CCNA_01201 PE=4 SV=1 - [A0A0H3C8W1_CAUCN]	CCNA_01201	1.02493	1.07546	1.02736	0.985258	0.9788	0.974947	0.923224	1.08593	0.98287	0.991841	0.961294	0.990955	0.850169	0.997635	1.01058	0.987194
A0A0H3C8W2	Glucoamylase OS=Caulobacter crescentus (strain NA1000 / CB15N) GN=CCNA_02365 PE=4 SV=1 - [A0A0H3C8W2_CAUCN]	CCNA_02365	0.976199	0.974929	0.965138	0.820635	0.82844	0.943931	1.54792	1.30679	0.952133	0.948503	0.840643	1.00383	1.18452	1.01146	0.86938	1.16343
A0A0H3C8W3	Mth938-like membrane protein OS=Caulobacter crescentus (strain NA1000 / CB15N) GN=CCNA_02068 PE=4 SV=1 - [A0A0H3C8W3_CAUCN]	CCNA_02068	1.04756	1.00879	0.876531	0.875617	0.966764	0.956931	0.992739	0.98365	1.13127	1.18528	0.835864	0.95443	1.00924	1.19512	0.915026	1.3061
A0A0H3C8W5	Methyltransferase OS=Caulobacter crescentus (strain NA1000 / CB15N) GN=CCNA_01748 PE=4 SV=1 - [A0A0H3C8W5_CAUCN]	CCNA_01748	0.989289	0.945454	1.03344	0.991118	1.06143	0.932208	0.962809	0.943604	1.00745	0.976102	1.00185	1.03211	1.02035	0.957274	1.06319	0.900376
A0A0H3C8W7	Uncharacterized protein OS=Caulobacter crescentus (strain NA1000 / CB15N) GN=CCNA_01828 PE=4 SV=1 - [A0A0H3C8W7_CAUCN]	CCNA_01828	1.00852	0.988743	1.05283	1.03014	1.0265	0.977639	0.94355	0.935338	1.07519	0.970576	1.02144	1.10778	1.00878	0.957909	1.0537	0.909092
A0A0H3C8W8	TonB-dependent maltose outer membrane transporter malA OS=Caulobacter crescentus (strain NA1000 / CB15N) GN=malA PE=3 SV=1 - [A0A0H3C8W8_CAUCN]	malA	0.89726	0.946034	0.927416	0.776178	0.836056	0.794701	2.34924	1.96641	0.722327	0.592074	0.865054	1.21999	1.19468	0.967483	0.976692	0.990571
A0A0H3C8W9	Cupin domain transcriptional regulator OS=Caulobacter crescentus (strain NA1000 / CB15N) GN=CCNA_02073 PE=4 SV=1 - [A0A0H3C8W9_CAUCN]	CCNA_02073											#DIV/0!	#DIV/0!	#DIV/0!	#DIV/0!	#DIV/0!	#DIV/0!
A0A0H3C8X0	dATP pyrophosphohydrolase OS=Caulobacter crescentus (strain NA1000 / CB15N) GN=CCNA_01212 PE=4 SV=1 - [A0A0H3C8X0_CAUCN]	CCNA_01212	1.03578	1.0181	1.04885	0.935296	0.986735	1.00995	0.993117	1.02436	1.01869	0.949879	0.902984	1.07244	0.969497	0.987538	0.926078	1.06637
A0A0H3C8X1	Glucosylceramidase OS=Caulobacter crescentus (strain NA1000 / CB15N) GN=CCNA_01833 PE=3 SV=1 - [A0A0H3C8X1_CAUCN]	CCNA_01833	1.05944	0.983377	1.01774	0.943244	0.98829	0.890003	1.07341	1.19591	1.0584	0.929061	0.890321	1.13922	0.897571	1.04097	1.05982	0.982216
A0A0H3C8X4	Phosphatidylglycerophosphate synthase OS=Caulobacter crescentus (strain NA1000 / CB15N) GN=CCNA_01217 PE=3 SV=1 - [A0A0H3C8X4_CAUCN]	CCNA_01217	0.970249	0.994264	0.946444	1.06712	1.04487	1.07997	0.944185	1.00636	1.00173	0.960873	1.09984	1.04252	0.938217	1.02515	0.988101	1.0375
A0A0H3C8X5	Chromosome segregation and condensation protein fusion scpA OS=Caulobacter crescentus (strain NA1000 / CB15N) GN=scpA PE=4 SV=1 - [A0A0H3C8X5_CAUCN]	scpA	1.05967	0.978005	1.11763	0.926265	1.08388	1.08543	0.950024	1.02219	0.95032	0.911666	0.874103	1.0424	0.929399	0.948141	0.853363	1.11106
A0A0H3C8X6	MerR-family transcriptional regulator OS=Caulobacter crescentus (strain NA1000 / CB15N) GN=CCNA_01840 PE=4 SV=1 - [A0A0H3C8X6_CAUCN]	CCNA_01840	1.13078	0.966586	1.02219	1.01955	0.918302	0.95429	0.95601	1.00273	1.00378	1.02764	0.901634	0.976789	0.953409	1.10623	1.06838	1.03542
A0A0H3C8X7	NADH-ubiquinone oxidoreductase OS=Caulobacter crescentus (strain NA1000 / CB15N) GN=CCNA_01222 PE=4 SV=1 - [A0A0H3C8X7_CAUCN]	CCNA_01222	0.970278	0.986115	1.11119	0.912452	1.02396	1.04504	0.957615	1.02471	1.05754	0.986739	0.940403	1.07175	0.934524	0.873187	0.873129	1.00007
A0A0H3C8X9	Uncharacterized protein OS=Caulobacter crescentus (strain NA1000 / CB15N) GN=CCNA_02091 PE=4 SV=1 - [A0A0H3C8X9_CAUCN]	CCNA_02091											#DIV/0!	#DIV/0!	#DIV/0!	#DIV/0!	#DIV/0!	#DIV/0!
A0A0H3C8Y0	Two-component response regulator protein OS=Caulobacter crescentus (strain NA1000 / CB15N) GN=CCNA_01845 PE=4 SV=1 - [A0A0H3C8Y0_CAUCN]	CCNA_01845	0.827225	0.815507	0.872301	0.996486	0.973693	1.0145	1.139	1.1627	1.07514	1.21908	1.20461	0.881924	0.979618	0.948325	0.982241	0.965471
A0A0H3C8Y1	Alkanesulfonate monoxygenase OS=Caulobacter crescentus (strain NA1000 / CB15N) GN=CCNA_01227 PE=4 SV=1 - [A0A0H3C8Y1_CAUCN]	CCNA_01227	1.00277	1.02284	0.981724	1.07699	1.01974	1.01517	0.924148	0.864767	1.112	0.963355	1.07401	1.15429	1.06867	1.02144	1.0609	0.962808
A0A0H3C8Y3	Quinol cytochrome oxidase polypeptide I OS=Caulobacter crescentus (strain NA1000 / CB15N) GN=qoxB PE=3 SV=1 - [A0A0H3C8Y3_CAUCN]	qoxB	0.885219	0.921917	0.938895	0.96595	1.00875	0.994565	1.08967	1.09956	0.966056	1.21006	1.0912	0.798356	0.990998	0.94283	0.971229	0.97076
A0A0H3C8Y4	Chaperone SurA OS=Caulobacter crescentus (strain NA1000 / CB15N) GN=CCNA_01759 PE=4 SV=1 - [A0A0H3C8Y4_CAUCN]	CCNA_01759	1.0084	1.0014	0.969676	0.956335	0.938489	0.907119	1.04846	1.05464	1.04643	1.09012	0.948366	0.959923	0.994137	1.03994	1.05425	0.98642
A0A0H3C8Y5	CusF-family protein OS=Caulobacter crescentus (strain NA1000 / CB15N) GN=CCNA_02096 PE=4 SV=1 - [A0A0H3C8Y5_CAUCN]	CCNA_02096	0.902007	0.917919	0.942699	1.12549	1.14814	1.17897	0.964753	0.971169	0.993598	0.951744	1.24776	1.04398	0.993394	0.956834	0.954637	1.0023
A0A0H3C8Y7	Superoxide dismutase OS=Caulobacter crescentus (strain NA1000 / CB15N) GN=CCNA_01855 PE=3 SV=1 - [A0A0H3C8Y7_CAUCN]	CCNA_01855	1.10283	1.14954	1.05497	0.8286	0.743285	0.787693	0.984426	1.07382	1.0002	1.26304	0.751341	0.791899	0.916752	1.04537	1.05193	0.993758
A0A0H3C8Z0	Glycosyl hydrolase OS=Caulobacter crescentus (strain NA1000 / CB15N) GN=CCNA_02102 PE=4 SV=1 - [A0A0H3C8Z0_CAUCN]	CCNA_02102	1.02076	1.02506	1.03324	1.02488	1.01097	0.975165	1.0007	0.930235	0.992109	0.972276	1.00403	1.0204	1.07575	0.987929	1.05098	0.940009
A0A0H3C8Z1	ATP-dependent helicase hrpB OS=Caulobacter crescentus (strain NA1000 / CB15N) GN=CCNA_01243 PE=4 SV=1 - [A0A0H3C8Z1_CAUCN]	CCNA_01243	0.98966	1.01939	1.01074	1.03964	0.997183	0.968073	1.01152	1.01833	0.966618	1.00727	1.0505	0.959637	0.99332	0.97914	1.07392	0.911741
A0A0H3C8Z2	Iron-regulated membrane protein OS=Caulobacter crescentus (strain NA1000 / CB15N) GN=CCNA_01860 PE=4 SV=1 - [A0A0H3C8Z2_CAUCN]	CCNA_01860	1.01913	0.951514	1.03055	0.806281	0.848107	0.800208	1.15789	1.12304	1.05738	1.28101	0.791146	0.825429	1.03104	0.988917	1.00759	0.981469
A0A0H3C8Z3	23S rRNA methyltransferase OS=Caulobacter crescentus (strain NA1000 / CB15N) GN=CCNA_02399 PE=4 SV=1 - [A0A0H3C8Z3_CAUCN]	CCNA_02399	1.00492	0.958687	1.1034	0.965674	1.04054	0.993211	1.04042	0.957491	0.948876	1.05189	0.960943	0.902064	1.08661	0.910751	0.972275	0.936723
A0A0H3C8Z4	DNA polymerase III, chi subunit OS=Caulobacter crescentus (strain NA1000 / CB15N) GN=CCNA_01764 PE=4 SV=1 - [A0A0H3C8Z4_CAUCN]	CCNA_01764	0.917906	0.985293	0.954184	1.04965	1.09234	1.20315	0.934537	0.782372	1.17991	0.904528	1.14353	1.30445	1.19449	0.96198	0.872415	1.10266
A0A0H3C8Z5	TolB protein/tail-specific protease OS=Caulobacter crescentus (strain NA1000 / CB15N) GN=CCNA_02108 PE=4 SV=1 - [A0A0H3C8Z5_CAUCN]	CCNA_02108	0.819816	0.934474	0.788365	0.999948	1.02009	1.12168	0.85562	0.961338	1.24892	1.27153	1.21972	0.982218	0.890031	1.03989	0.891475	1.16649
A0A0H3C8Z6	TetR-family transcriptional regulator OS=Caulobacter crescentus (strain NA1000 / CB15N) GN=CCNA_01248 PE=4 SV=1 - [A0A0H3C8Z6_CAUCN]	CCNA_01248	1.00487	1.27047	1.01844	0.963029	1.00885	0.956881	0.985275	0.985988	0.895213	0.945811	0.958363	0.946503	0.999277	0.986672	1.00643	0.980373
A0A0H3C8Z7	Periplasmic multidrug efflux lipoprotein OS=Caulobacter crescentus (strain NA1000 / CB15N) GN=CCNA_01865 PE=3 SV=1 - [A0A0H3C8Z7_CAUCN]	CCNA_01865	1.0854	1.04906	1.14365	0.89568	0.873047	0.91107	1.10404	1.20002	0.946368	0.931302	0.825211	1.01618	0.920011	0.94906	0.983107	0.965367
A0A0H3C8Z8	4-hydroxy-tetrahydrodipicolinate synthase OS=Caulobacter crescentus (strain NA1000 / CB15N) GN=dapA PE=3 SV=1 - [A0A0H3C8Z8_CAUCN]	dapA	1.00535	0.998031	0.988552	0.994178	0.95851	0.932754	0.965074	1.02078	1.0679	1.07291	0.98889	0.995331	0.94543	1.01699	1.06585	0.954157
A0A0H3C8Z9	ABC transporter ATP-binding protein OS=Caulobacter crescentus (strain NA1000 / CB15N) GN=CCNA_02404 PE=4 SV=1 - [A0A0H3C8Z9_CAUCN]	CCNA_02404	1.0285	1.08244	1.01048	0.981364	0.909537	1.05323	0.862538	1.03282	1.04208	1.01907	0.954168	1.02257	0.83513	1.01784	0.931764	1.09237
A0A0H3C902	Class II aldolase and Adducin protein OS=Caulobacter crescentus (strain NA1000 / CB15N) GN=CCNA_01259 PE=4 SV=1 - [A0A0H3C902_CAUCN]	CCNA_01259	1.09771	1.03239	1.07674	0.867662	0.88234	0.944861	0.885475	1.00996	1.10633	1.01826	0.790432	1.0865	0.876744	1.01947	0.918296	1.11017
A0A0H3C903	Hybrid sensor histidine kinase/receiver protein OS=Caulobacter crescentus (strain NA1000 / CB15N) GN=CCNA_02409 PE=4 SV=1 - [A0A0H3C903_CAUCN]	CCNA_02409	0.967912	0.994665	0.864305	1.35784	1.1437	1.12684	1.00761	0.916986	0.934229	0.847969	1.40285	1.10173	1.09883	1.11987	1.205	0.929357
A0A0H3C908	DadA-related amino acid oxidase OS=Caulobacter crescentus (strain NA1000 / CB15N) GN=CCNA_02414 PE=4 SV=1 - [A0A0H3C908_CAUCN]	CCNA_02414	0.969541	1.07884	1.04253	0.933497	0.957035	1.05724	1.00594	1.01613	1.02142	0.998852	0.962824	1.02259	0.989975	0.929984	0.882956	1.05326
A0A0H3C912	TonB1 protein OS=Caulobacter crescentus (strain NA1000 / CB15N) GN=tonB1 PE=4 SV=1 - [A0A0H3C912_CAUCN]	tonB1	1.06181	1.02727	1.02898	0.929173	1.00452	1.0147	0.97921	0.974269	1.02021	0.946433	0.875082	1.07795	1.00507	1.03191	0.915716	1.12689
A0A0H3C913	ABC transporter ATP-binding protein OS=Caulobacter crescentus (strain NA1000 / CB15N) GN=CCNA_01769 PE=4 SV=1 - [A0A0H3C913_CAUCN]	CCNA_01769	1.04794	0.981054	1.03091	0.935298	0.971356	0.89606	1.09129	1.05813	0.992297	1.06409	0.892507	0.932527	1.03134	1.01652	1.04379	0.973878
A0A0H3C915	Pyruvate kinase OS=Caulobacter crescentus (strain NA1000 / CB15N) GN=CCNA_02130 PE=3 SV=1 - [A0A0H3C915_CAUCN]	CCNA_02130	0.805433	0.726819	0.751607	1.18136	1.18909	1.23665	1.05688	1.17395	1.0805	1.01409	1.46674	1.06549	0.900279	1.07161	0.955291	1.12177
A0A0H3C917	Glycerol kinase OS=Caulobacter crescentus (strain NA1000 / CB15N) GN=glpK PE=3 SV=1 - [A0A0H3C917_CAUCN]	glpK	1.24345	1.10732	1.19996	0.899327	0.847621	0.909317	0.948365	0.963157	0.937699	0.923715	0.723251	1.01514	0.984641	1.03624	0.989014	1.04775
A0A0H3C919	DNA polymerase III, delta' subunit OS=Caulobacter crescentus (strain NA1000 / CB15N) GN=CCNA_01899 PE=4 SV=1 - [A0A0H3C919_CAUCN]	CCNA_01899	0.971391	0.955712	0.985139	0.951307	1.0526	1.02957	0.98131	1.07058	0.983147	1.04463	0.979324	0.941145	0.916614	0.986045	0.923986	1.06716
A0A0H3C920	Uncharacterized protein OS=Caulobacter crescentus (strain NA1000 / CB15N) GN=CCNA_01286 PE=4 SV=1 - [A0A0H3C920_CAUCN]	CCNA_01286	0.946174	0.827332	0.847883	1.09465	1.1064	1.22326	1.12876	0.917969	1.01673	1.0098	1.15693	1.00686	1.22963	1.11593	0.894865	1.24703
A0A0H3C921	Histidinol dehydrogenase OS=Caulobacter crescentus (strain NA1000 / CB15N) GN=hisD PE=3 SV=1 - [A0A0H3C921_CAUCN]	hisD	0.956745	0.914315	1.00534	0.955855	0.997767	0.983813	1.01318	0.985617	1.1029	1.09464	0.99907	1.00755	1.02797	0.951665	0.971582	0.9795
A0A0H3C924	Phosphoribosylformylglycinamidine cyclo-ligase OS=Caulobacter crescentus (strain NA1000 / CB15N) GN=purM PE=3 SV=1 - [A0A0H3C924_CAUCN]	purM	1.04504	1.02875	1.04241	1.03534	0.977272	1.0016	1.06939	1.0607	0.942102	0.978291	0.990716	0.963008	1.00819	1.00252	1.03368	0.969851
A0A0H3C926	LysR-family transcriptional regulator OS=Caulobacter crescentus (strain NA1000 / CB15N) GN=CCNA_02437 PE=4 SV=1 - [A0A0H3C926_CAUCN]	CCNA_02437											#DIV/0!	#DIV/0!	#DIV/0!	#DIV/0!	#DIV/0!	#DIV/0!
A0A0H3C927	Stalk-specific protein X OS=Caulobacter crescentus (strain NA1000 / CB15N) GN=stpX PE=4 SV=1 - [A0A0H3C927_CAUCN]	stpX	1.08249	0.981417	1.01049	1.10469	1.21712	1.10738	0.834528	0.859048	0.949623	0.843718	1.02051	1.12552	0.971458	1.07125	0.997567	1.07386
A0A0H3C928	Exopolyphosphatase OS=Caulobacter crescentus (strain NA1000 / CB15N) GN=ppx1 PE=4 SV=1 - [A0A0H3C928_CAUCN]	ppx1	0.935678	0.890236	0.94094	1.18227	1.17051	1.21773	0.924427	0.932265	0.942969	0.79559	1.26354	1.18524	0.991593	0.994408	0.970879	1.02423
A0A0H3C929	16S rRNA m(2)G 1207 methyltransferase RsmC OS=Caulobacter crescentus (strain NA1000 / CB15N) GN=CCNA_01914 PE=4 SV=1 - [A0A0H3C929_CAUCN]	CCNA_01914	0.998629	1.04891	1.02353	0.996204	1.00031	1.05639	1.05891	0.966549	1.02385	0.959307	0.997572	1.06728	1.09556	0.975673	0.943026	1.03462
A0A0H3C930	NAD-dependent formate dehydrogenase alpha subunit OS=Caulobacter crescentus (strain NA1000 / CB15N) GN=CCNA_01301 PE=3 SV=1 - [A0A0H3C930_CAUCN]	CCNA_01301	1.02598	0.941216	0.976015	1.01655	1.04105	0.985236	1.01773	0.83846	1.10074	1.0396	0.990815	1.05882	1.2138	1.05119	1.03178	1.01881
A0A0H3C932	FrnE protein OS=Caulobacter crescentus (strain NA1000 / CB15N) GN=CCNA_01919 PE=4 SV=1 - [A0A0H3C932_CAUCN]	CCNA_01919	0.953413	0.993615	0.918791	1.07788	1.11661	1.07543	0.951297	0.919572	1.05085	0.997768	1.13055	1.05321	1.0345	1.03768	1.00228	1.03533
A0A0H3C933	50S ribosomal protein L22 OS=Caulobacter crescentus (strain NA1000 / CB15N) GN=rplV PE=3 SV=1 - [A0A0H3C933_CAUCN]	rplV	1.04329	1.00629	1.04231	0.923724	0.901835	0.920506	1.03713	1.06148	1.01975	1.0598	0.885399	0.962215	0.977061	1.00093	1.0035	0.997447
A0A0H3C934	Uncharacterized protein OS=Caulobacter crescentus (strain NA1000 / CB15N) GN=CCNA_02448 PE=4 SV=1 - [A0A0H3C934_CAUCN]	CCNA_02448	1.05876	1.01081	1.01347	1.02915	1.03839	1.01033	0.957975	0.951058	1.02487	0.941486	0.972039	1.08856	1.00727	1.04468	1.01863	1.02557
A0A0H3C935	Capsular polysaccharide biosynthesis protein OS=Caulobacter crescentus (strain NA1000 / CB15N) GN=CCNA_01924 PE=4 SV=1 - [A0A0H3C935_CAUCN]	CCNA_01924											#DIV/0!	#DIV/0!	#DIV/0!	#DIV/0!	#DIV/0!	#DIV/0!
A0A0H3C936	ABC-type multidrug transport system, ATPase component OS=Caulobacter crescentus (strain NA1000 / CB15N) GN=CCNA_01335 PE=4 SV=1 - [A0A0H3C936_CAUCN]	CCNA_01335	1.01801	1.04002	1.03854	0.976353	0.992834	1.02401	1.04149	1.00183	1.03397	0.909938	0.959079	1.13631	1.03959	0.980232	0.953465	1.02807
A0A0H3C937	Protein tyrosine phosphatase OS=Caulobacter crescentus (strain NA1000 / CB15N) GN=CCNA_02453 PE=4 SV=1 - [A0A0H3C937_CAUCN]	CCNA_02453	1.00143	1.28281	0.915119	0.936417	0.88935	0.882836	1.08378	1.11352	0.973079	1.02299	0.935083	0.951208	0.973289	1.09431	1.06069	1.0317
A0A0H3C938	Uncharacterized protein OS=Caulobacter crescentus (strain NA1000 / CB15N) GN=CCNA_01929 PE=4 SV=1 - [A0A0H3C938_CAUCN]	CCNA_01929	0.88485	0.993561	1.00626	0.961139	0.943394	0.90378	1.0159	1.10811	0.966885	1.03075	1.08622	0.938038	0.916788	0.879344	1.06347	0.826866
A0A0H3C940	Glucose-6-phosphate 1-dehydrogenase OS=Caulobacter crescentus (strain NA1000 / CB15N) GN=zwf PE=3 SV=1 - [A0A0H3C940_CAUCN]	zwf	0.974438	0.964815	0.956536	0.998863	0.961187	0.951568	1.24699	1.30145	0.876313	0.850649	1.02507	1.03017	0.958158	1.01872	1.0497	0.970481
A0A0H3C942	HesB protein family OS=Caulobacter crescentus (strain NA1000 / CB15N) GN=CCNA_01934 PE=3 SV=1 - [A0A0H3C942_CAUCN]	CCNA_01934	0.913197	0.865751	0.892432	1.18169	1.1099	1.09706	1.03479	0.862049	1.13928	0.951367	1.29401	1.19751	1.20038	1.02327	1.07714	0.949985
A0A0H3C943	Short chain dehydrogenase OS=Caulobacter crescentus (strain NA1000 / CB15N) GN=CCNA_01345 PE=4 SV=1 - [A0A0H3C943_CAUCN]	CCNA_01345	0.911231	0.978286	1.06448	0.949601	1.00652	1.03713	0.987474	0.975347	1.05153	1.07217	1.04211	0.98075	1.01243	0.856036	0.915601	0.934944
A0A0H3C945	Protein translocase subunit secG OS=Caulobacter crescentus (strain NA1000 / CB15N) GN=CCNA_01790 PE=4 SV=1 - [A0A0H3C945_CAUCN]	CCNA_01790	0.948989	0.921128	0.954974	1.01575	1.00923	1.00893	1.16742	1.09849	0.971555	1.02853	1.07035	0.944607	1.06275	0.993733	1.00676	0.987058
A0A0H3C946	Methylmalonyl-CoA mutase beta subunit OS=Caulobacter crescentus (strain NA1000 / CB15N) GN=CCNA_02458 PE=4 SV=1 - [A0A0H3C946_CAUCN]	CCNA_02458	1.11774	1.00458	1.08203	0.928004	1.02775	0.938488	0.936825	0.961016	1.06826	1.03155	0.83025	1.03559	0.974827	1.033	0.988829	1.04467
A0A0H3C947	ADP-ribosylglycohydrolase OS=Caulobacter crescentus (strain NA1000 / CB15N) GN=CCNA_01939 PE=4 SV=1 - [A0A0H3C947_CAUCN]	CCNA_01939	0.903118	0.968916	0.973028	1.10937	1.03087	0.997832	0.998888	0.999916	1.09201	0.99604	1.22838	1.09635	0.998972	0.928152	1.11178	0.834836
A0A0H3C950	Pyruvate dehydrogenase E1 component beta subunit OS=Caulobacter crescentus (strain NA1000 / CB15N) GN=CCNA_01800 PE=4 SV=1 - [A0A0H3C950_CAUCN]	CCNA_01800	1.12784	1.1095	1.09745	0.912735	0.901859	0.875282	1.10351	1.09555	0.927828	0.925522	0.809276	1.00249	1.00727	1.0277	1.04279	0.985526
A0A0H3C951	UDP-glucose 6-dehydrogenase OS=Caulobacter crescentus (strain NA1000 / CB15N) GN=CCNA_02464 PE=3 SV=1 - [A0A0H3C951_CAUCN]	CCNA_02464	0.981865	0.973419	1.08718	0.960927	0.908985	0.971445	1.09769	1.05017	1.00569	1.09293	0.978675	0.920179	1.04525	0.903134	0.989173	0.913019
A0A0H3C952	Uncharacterized protein OS=Caulobacter crescentus (strain NA1000 / CB15N) GN=CCNA_02155 PE=4 SV=1 - [A0A0H3C952_CAUCN]	CCNA_02155	0.992004	0.983751	0.898802	1.02725	0.972684	1.0425	0.978323	0.822487	1.18063	1.07662	1.03553	1.09661	1.18947	1.1037	0.98537	1.12008
A0A0H3C954	Transcriptional regulator IolR OS=Caulobacter crescentus (strain NA1000 / CB15N) GN=iolR PE=4 SV=1 - [A0A0H3C954_CAUCN]	iolR	1.0928	1.08924	1.23966	0.954018	0.919639	0.885108	0.934763	0.966614	1.01916	0.893805	0.873001	1.14025	0.967049	0.881538	1.07786	0.817863
A0A0H3C955	Dihydrolipoyl dehydrogenase OS=Caulobacter crescentus (strain NA1000 / CB15N) GN=CCNA_01805 PE=4 SV=1 - [A0A0H3C955_CAUCN]	CCNA_01805	1.13891	1.0673	1.08568	0.963054	0.936548	0.904376	1.12346	1.04812	0.903425	0.918424	0.845589	0.98367	1.07188	1.04904	1.06488	0.98512
A0A0H3C958	Multimodular transpeptidase-transglycosylase PbpY OS=Caulobacter crescentus (strain NA1000 / CB15N) GN=pbpY PE=4 SV=1 - [A0A0H3C958_CAUCN]	pbpY	1.013	1.03405	1.04148	1.01867	0.985631	0.993613	1.03506	1.00561	0.978898	0.980488	1.0056	0.998378	1.02929	0.972654	1.02522	0.948725
A0A0H3C959	Competence/damage-inducible protein CinA OS=Caulobacter crescentus (strain NA1000 / CB15N) GN=CCNA_01811 PE=4 SV=1 - [A0A0H3C959_CAUCN]	CCNA_01811	1.02078	0.976836	1.08801	1.17668	0.975883	1.0755	0.847981	0.906458	0.98611	0.927411	1.15273	1.06329	0.935489	0.938201	1.09408	0.857526
A0A0H3C960	Malonate-semialdehyde dehydrogenase IolA OS=Caulobacter crescentus (strain NA1000 / CB15N) GN=iolA PE=4 SV=1 - [A0A0H3C960_CAUCN]	iolA	1.60207	1.51801	1.5915	0.720517	0.706206	0.686565	0.728436	0.659518	0.83375	0.676002	0.44974	1.23335	1.1045	1.00664	1.04945	0.959207
A0A0H3C962	MarR-family transcriptional regulator OS=Caulobacter crescentus (strain NA1000 / CB15N) GN=CCNA_02474 PE=4 SV=1 - [A0A0H3C962_CAUCN]	CCNA_02474	0.997554	0.941722	1.08419	0.864307	1.01415	1.03793	0.98578	1.11961	1.09524	0.975156	0.866426	1.12314	0.880465	0.920092	0.832721	1.10492
A0A0H3C963	Nitrogen assimilation regulatory protein ntrX OS=Caulobacter crescentus (strain NA1000 / CB15N) GN=ntrX PE=4 SV=1 - [A0A0H3C963_CAUCN]	ntrX	1.04058	1.02882	1.01102	1.0235	1.01619	1.01352	0.983507	1.02329	0.983503	0.954995	0.983588	1.02985	0.961123	1.02924	1.00985	1.01921
A0A0H3C964	ABC-type transporter, permease component OS=Caulobacter crescentus (strain NA1000 / CB15N) GN=CCNA_02172 PE=3 SV=1 - [A0A0H3C964_CAUCN]	CCNA_02172	0.967895	1.02249	1.1026	0.931706	0.944732	1.0004	1.11823	1.1474	1.08788	0.924927	0.962611	1.17618	0.974577	0.877827	0.931334	0.942549
A0A0H3C965	ThiaminS ubiquitin-like sulfur carrier protein ThiS OS=Caulobacter crescentus (strain NA1000 / CB15N) GN=thiS PE=4 SV=1 - [A0A0H3C965_CAUCN]	thiS	0.98944	0.971188	1.02789	0.951553	0.938945	0.91181	1.11307	1.06714	1.08921	1.0368	0.961709	1.05055	1.04304	0.96259	1.04359	0.922387
A0A0H3C970	Vitamin B12-dependent ribonucleotide reductase OS=Caulobacter crescentus (strain NA1000 / CB15N) GN=CCNA_01966 PE=4 SV=1 - [A0A0H3C970_CAUCN]	CCNA_01966	1.08703	0.961755	0.951971	0.96939	0.918952	0.857647	1.14569	1.02761	1.07123	1.06222	0.891779	1.00848	1.11492	1.14187	1.13029	1.01025
A0A0H3C971	Uncharacterized protein OS=Caulobacter crescentus (strain NA1000 / CB15N) GN=CCNA_01371 PE=4 SV=1 - [A0A0H3C971_CAUCN]	CCNA_01371	1.18443	1.14324	1.11247	0.829756	0.725829	0.69227	0.991977	1.12609	1.07102	1.06037	0.700555	1.01004	0.880905	1.06468	1.1986	0.888271
A0A0H3C972	Trans-feruloyl-CoA hydratase OS=Caulobacter crescentus (strain NA1000 / CB15N) GN=CCNA_02484 PE=4 SV=1 - [A0A0H3C972_CAUCN]	CCNA_02484	0.910271	0.955736	1.11307	0.949059	0.978239	1.13191	1.00296	0.95154	1.09486	0.982078	1.04261	1.11484	1.05404	0.817798	0.838454	0.975365
A0A0H3C973	SalR-family ligand-binding transcriptional regulator OS=Caulobacter crescentus (strain NA1000 / CB15N) GN=CCNA_01829 PE=4 SV=1 - [A0A0H3C973_CAUCN]	CCNA_01829	1.10092	1.03213	1.02552	1.12658	0.97326	0.958008	1.06662	1.01633	0.891572	0.880849	1.0233	1.01217	1.04948	1.07353	1.17596	0.912897
A0A0H3C974	Phosphoserine phosphatase OS=Caulobacter crescentus (strain NA1000 / CB15N) GN=CCNA_02182 PE=4 SV=1 - [A0A0H3C974_CAUCN]	CCNA_02182	1.00483	1.00004	0.981038	0.995448	0.938818	0.933646	1.12522	1.08131	0.95718	1.04005	0.990668	0.920316	1.04061	1.02425	1.06619	0.960656
A0A0H3C975	Peptidyl-prolyl cis-trans isomerase OS=Caulobacter crescentus (strain NA1000 / CB15N) GN=CCNA_01971 PE=4 SV=1 - [A0A0H3C975_CAUCN]	CCNA_01971	1.0427	0.990167	1.01141	1.03688	0.99076	0.969006	1.05197	1.01059	0.980163	1.0271	0.994413	0.954306	1.04094	1.03094	1.07004	0.963459
A0A0H3C976	Glutathione S-transferase OS=Caulobacter crescentus (strain NA1000 / CB15N) GN=CCNA_01376 PE=3 SV=1 - [A0A0H3C976_CAUCN]	CCNA_01376	0.654869	0.717669	0.619597	1.22457	1.0955	1.28414	0.766317	0.965981	1.53566	1.1508	1.86994	1.33443	0.793305	1.05693	0.953607	1.10835
A0A0H3C977	Oxidoreductase OS=Caulobacter crescentus (strain NA1000 / CB15N) GN=CCNA_01834 PE=3 SV=1 - [A0A0H3C977_CAUCN]	CCNA_01834	0.827167	0.853301	0.861807	1.2688	1.20652	1.24924	0.908969	0.944255	1.09507	0.886421	1.53391	1.23539	0.962631	0.959805	1.01566	0.945005
A0A0H3C978	PaaI-family thioesterase OS=Caulobacter crescentus (strain NA1000 / CB15N) GN=CCNA_02188 PE=4 SV=1 - [A0A0H3C978_CAUCN]	CCNA_02188	1.00157	1.04514	1.01871	0.939223	1.00718	1.06685	1.10672	1.05782	1.01787	0.874462	0.937748	1.164	1.04622	0.983182	0.880371	1.11678
A0A0H3C979	Acetate/3-ketoacid CoA transferase, subunit B OS=Caulobacter crescentus (strain NA1000 / CB15N) GN=CCNA_02489 PE=4 SV=1 - [A0A0H3C979_CAUCN]	CCNA_02489	0.541995	0.536722	0.58199	0.507796	0.565257	0.512954	0.585266	0.789321	0.902723	3.6611	0.936902	0.246572	0.74148	0.931278	0.989946	0.940737
A0A0H3C980	Methyltransferase OS=Caulobacter crescentus (strain NA1000 / CB15N) GN=CCNA_01978 PE=4 SV=1 - [A0A0H3C980_CAUCN]	CCNA_01978	1.01742	1.0435	1.12261	0.933293	0.924932	1.20872	0.995814	1.15444	0.794797	0.960269	0.917309	0.827681	0.862592	0.906302	0.772132	1.17377
A0A0H3C981	Valine--tRNA ligase OS=Caulobacter crescentus (strain NA1000 / CB15N) GN=valS PE=3 SV=1 - [A0A0H3C981_CAUCN]	valS	0.983646	0.951639	0.98608	0.95647	0.950264	0.923092	1.06085	1.06077	1.01465	1.09741	0.972372	0.924584	1.00008	0.997532	1.03616	0.96272
A0A0H3C982	Uncharacterized protein OS=Caulobacter crescentus (strain NA1000 / CB15N) GN=CCNA_02193 PE=4 SV=1 - [A0A0H3C982_CAUCN]	CCNA_02193	1.00272	1.17206	0.920371	0.996993	1.02479	1.00734	0.976213	0.967924	0.986518	0.980002	0.994289	1.00665	1.00856	1.08947	0.989726	1.10078
A0A0H3C984	3-oxoadipate enol-lactonase/4-carboxymuconolactone decarboxylase OS=Caulobacter crescentus (strain NA1000 / CB15N) GN=CCNA_02494 PE=4 SV=1 - [A0A0H3C984_CAUCN]	CCNA_02494	0.80885	0.809991	0.858302	0.709266	0.791553	0.705319	0.87494	0.821513	0.999557	2.39239	0.876882	0.417807	1.06503	0.942384	1.0056	0.937139
A0A0H3C985	Citrate synthase OS=Caulobacter crescentus (strain NA1000 / CB15N) GN=CCNA_01983 PE=3 SV=1 - [A0A0H3C985_CAUCN]	CCNA_01983	1.03521	1.01235	1.0243	0.979664	0.97279	0.962704	1.00426	1.02742	0.982486	1.07337	0.946344	0.915331	0.97746	1.01065	1.01762	0.993154
A0A0H3C986	Trans-isoprenyl diphosphate synthase OS=Caulobacter crescentus (strain NA1000 / CB15N) GN=CCNA_02198 PE=3 SV=1 - [A0A0H3C986_CAUCN]	CCNA_02198	1.01216	1.03221	1.00535	0.922404	0.927635	0.919469	1.02455	1.07884	1.03294	1.06597	0.911323	0.969014	0.949677	1.00678	1.00319	1.00357
A0A0H3C987	Uncharacterized protein OS=Caulobacter crescentus (strain NA1000 / CB15N) GN=CCNA_01386 PE=4 SV=1 - [A0A0H3C987_CAUCN]	CCNA_01386	0.52606	0.458293	0.456993	1.45636	1.31833	1.35681	1.44499	1.16353	1.22737	0.817165	2.76844	1.50199	1.2419	1.15113	1.07338	1.07244
A0A0H3C988	Two-component sensor histidine kinase OS=Caulobacter crescentus (strain NA1000 / CB15N) GN=CCNA_01846 PE=4 SV=1 - [A0A0H3C988_CAUCN]	CCNA_01846	0.762208	0.829712	0.823023	1.00961	1.00276	1.12364	1.20055	1.02958	1.12584	1.22842	1.32459	0.916491	1.16605	0.926108	0.898517	1.03071
A0A0H3C990	YceI-like domain protein OS=Caulobacter crescentus (strain NA1000 / CB15N) GN=CCNA_02203 PE=3 SV=1 - [A0A0H3C990_CAUCN]	CCNA_02203	1.00501	1.02245	1.01592	0.966545	0.947402	0.956232	0.902068	0.984468	1.08441	1.13874	0.961722	0.95229	0.9163	0.98927	1.01078	0.978715
A0A0H3C992	OmpH-like outer membrane protein OS=Caulobacter crescentus (strain NA1000 / CB15N) GN=CCNA_01991 PE=4 SV=1 - [A0A0H3C992_CAUCN]	CCNA_01991	1.03182	0.9905	1.00554	0.966312	0.963415	0.977208	1.00002	1.01472	1.03521	1.08658	0.936511	0.952721	0.985514	1.02614	0.98885	1.03771
A0A0H3C993	Type IV secretory pathway, VirB10 channel protein OS=Caulobacter crescentus (strain NA1000 / CB15N) GN=CCNA_02504 PE=4 SV=1 - [A0A0H3C993_CAUCN]	CCNA_02504	1.09618	1.09695	1.21635	1.07193	0.932352	0.941282	1.09492	0.771205	0.974874	0.781228	0.977883	1.24787	1.41975	0.901207	1.1388	0.791363
A0A0H3C994	Ubiquinol oxidase subunit 2 OS=Caulobacter crescentus (strain NA1000 / CB15N) GN=qoxA PE=3 SV=1 - [A0A0H3C994_CAUCN]	qoxA	0.84238	0.957403	0.863919	0.981559	0.895659	0.992221	1.17589	1.15514	1.09528	1.34096	1.16522	0.81679	1.01796	0.975069	0.989254	0.985661
A0A0H3C996	Tetratricopeptide repeat family protein OS=Caulobacter crescentus (strain NA1000 / CB15N) GN=CCNA_01396 PE=4 SV=1 - [A0A0H3C996_CAUCN]	CCNA_01396	1.03953	1.07321	0.996156	0.9934	0.96337	0.981096	0.969355	1.05564	0.936514	0.97862	0.955627	0.956974	0.918265	1.04354	1.01254	1.03061
A0A0H3C997	Uridylate kinase OS=Caulobacter crescentus (strain NA1000 / CB15N) GN=pyrH PE=3 SV=1 - [A0A0H3C997_CAUCN]	pyrH	1.04856	1.03651	1.05904	0.937132	0.929377	0.900045	1.1082	1.07581	0.955034	1.03018	0.893735	0.927059	1.0301	0.990106	1.04121	0.950922
A0A0H3C998	Glycosyltransferase hfsG OS=Caulobacter crescentus (strain NA1000 / CB15N) GN=hfsG PE=4 SV=1 - [A0A0H3C998_CAUCN]	hfsG	1.06502	1.00969	1.05892	0.932647	1.01052	1.00438	1.03964	1.01945	0.953599	0.984019	0.875711	0.969085	1.0198	1.00576	0.928577	1.08312
A0A0H3C999	Ferrichrome-iron receptor OS=Caulobacter crescentus (strain NA1000 / CB15N) GN=CCNA_01856 PE=3 SV=1 - [A0A0H3C999_CAUCN]	CCNA_01856	1.06319	1.06037	1.07083	0.788234	0.76146	0.734668	1.02054	1.07622	1.07885	1.36088	0.741384	0.79276	0.94826	0.992869	1.07291	0.925397
A0A0H3C9A0	Uncharacterized protein OS=Caulobacter crescentus (strain NA1000 / CB15N) GN=CCNA_02214 PE=4 SV=1 - [A0A0H3C9A0_CAUCN]	CCNA_02214											#DIV/0!	#DIV/0!	#DIV/0!	#DIV/0!	#DIV/0!	#DIV/0!
A0A0H3C9A1	GIY-YIG domain protein OS=Caulobacter crescentus (strain NA1000 / CB15N) GN=CCNA_01405 PE=4 SV=1 - [A0A0H3C9A1_CAUCN]	CCNA_01405	1.03494	0.967492	1.03174	0.816777	1.00229	0.823336	1.28182	1.2253	1.0803	0.947591	0.789204	1.14004	1.04613	1.0031	0.992033	1.01116
A0A0H3C9A2	Lipoprotein releasing system transmembrane protein lolE OS=Caulobacter crescentus (strain NA1000 / CB15N) GN=CCNA_02007 PE=3 SV=1 - [A0A0H3C9A2_CAUCN]	CCNA_02007	0.940579	0.855556	0.94491	1.08331	1.06247	1.10467	1.14265	1.06028	0.950525	1.00487	1.15175	0.945915	1.07769	0.995416	0.980662	1.01505
A0A0H3C9A3	Uncharacterized protein OS=Caulobacter crescentus (strain NA1000 / CB15N) GN=CCNA_02219 PE=4 SV=1 - [A0A0H3C9A3_CAUCN]	CCNA_02219	0.967191	0.97025	0.953366	0.930505	0.934172	0.946245	1.03227	1.0349	1.0292	1.12734	0.96207	0.912942	0.997463	1.0145	0.983366	1.03166
A0A0H3C9A4	Uncharacterized protein OS=Caulobacter crescentus (strain NA1000 / CB15N) GN=CCNA_01861 PE=4 SV=1 - [A0A0H3C9A4_CAUCN]	CCNA_01861	0.929098	0.904428	1.00621	1.1489	1.04338	0.97163	0.90959	0.761821	1.17674	1.08139	1.23658	1.08818	1.19397	0.923365	1.18245	0.780891
A0A0H3C9A5	Polysaccharide secretin protein hfsD OS=Caulobacter crescentus (strain NA1000 / CB15N) GN=hfsD PE=4 SV=1 - [A0A0H3C9A5_CAUCN]	hfsD	1.03472	0.982937	0.972587	0.937123	1.01035	0.998885	1.00686	1.04041	1.03135	1.05381	0.905678	0.978694	0.967752	1.06388	0.938169	1.134
A0A0H3C9A7	Type III pantothenate kinase OS=Caulobacter crescentus (strain NA1000 / CB15N) GN=coaX PE=3 SV=1 - [A0A0H3C9A7_CAUCN]	coaX	1.04643	1.07099	1.01442	0.880996	0.922066	0.88957	0.989039	1.04392	1.03416	1.13554	0.841903	0.91072	0.947431	1.03156	0.990362	1.0416
A0A0H3C9A8	Methylenetetrahydrofolate reductase OS=Caulobacter crescentus (strain NA1000 / CB15N) GN=CCNA_02224 PE=3 SV=1 - [A0A0H3C9A8_CAUCN]	CCNA_02224	1.10298	1.11482	1.07485	1.0106	0.985068	0.957878	0.977414	1.00854	0.922227	0.873758	0.916252	1.05547	0.969142	1.02616	1.05505	0.972626
A0A0H3C9A9	Cation/multidrug efflux pump acrB4 OS=Caulobacter crescentus (strain NA1000 / CB15N) GN=acrB4 PE=3 SV=1 - [A0A0H3C9A9_CAUCN]	acrB4	1.2907	1.19968	1.31382	0.872575	0.82194	0.875214	0.886013	1.15447	0.895075	0.720955	0.676049	1.24151	0.767464	0.982399	0.996985	0.98537
A0A0H3C9B2	NADH-quinone oxidoreductase chain J OS=Caulobacter crescentus (strain NA1000 / CB15N) GN=nuoJ PE=3 SV=1 - [A0A0H3C9B2_CAUCN]	nuoJ	1.02411	0.910153	0.990019	1.10838	1.09895	1.01639	1.13616	0.956995	0.903411	0.959382	1.08229	0.941659	1.18721	1.03443	1.09051	0.948579
A0A0H3C9B4	3-hydroxyisobutyrate dehydrogenase OS=Caulobacter crescentus (strain NA1000 / CB15N) GN=CCNA_01416 PE=3 SV=1 - [A0A0H3C9B4_CAUCN]	CCNA_01416	1.18384	1.2177	1.17237	0.885261	0.941846	0.866364	0.892391	0.94176	0.971777	0.882785	0.74779	1.10081	0.947578	1.00978	1.02181	0.988223
A0A0H3C9B7	NADH:flavin oxidoreductases, old yellow enzyme family OS=Caulobacter crescentus (strain NA1000 / CB15N) GN=CCNA_01879 PE=4 SV=1 - [A0A0H3C9B7_CAUCN]	CCNA_01879	0.986164	0.990528	1.05748	0.948554	0.967295	0.862774	1.18687	1.24075	0.923218	1.03221	0.961862	0.894409	0.956579	0.932558	1.09942	0.848224
A0A0H3C9B8	Thiamine-monophosphate kinase OS=Caulobacter crescentus (strain NA1000 / CB15N) GN=thiL PE=3 SV=1 - [A0A0H3C9B8_CAUCN]	thiL	0.941551	0.910422	0.94669	1.04366	0.993386	0.956335	1.03897	0.956771	0.991143	1.06992	1.10845	0.92637	1.08591	0.994571	1.09131	0.911352
A0A0H3C9B9	NADH-quinone oxidoreductase chain F OS=Caulobacter crescentus (strain NA1000 / CB15N) GN=nuoF PE=4 SV=1 - [A0A0H3C9B9_CAUCN]	nuoF	1.08779	1.04619	1.04256	1.00464	1.00033	0.960629	1.03698	1.05651	0.931114	0.953771	0.923557	0.976244	0.981514	1.04339	1.04581	0.997683
A0A0H3C9C0	Uncharacterized protein OS=Caulobacter crescentus (strain NA1000 / CB15N) GN=CCNA_02239 PE=4 SV=1 - [A0A0H3C9C0_CAUCN]	CCNA_02239	0.925948	1.24458	0.918954	1.02427	0.967957	1.01945	1.08783	1.0411	0.912205	0.975894	1.10619	0.934738	1.04488	1.00761	1.00474	1.00286
A0A0H3C9C3	Aminotransferase class I family protein OS=Caulobacter crescentus (strain NA1000 / CB15N) GN=CCNA_02244 PE=4 SV=1 - [A0A0H3C9C3_CAUCN]	CCNA_02244	1.10917	1.03407	1.08627	0.949897	0.926514	0.882163	0.975105	0.999237	0.970137	1.03117	0.8564	0.940808	0.97585	1.02109	1.07678	0.948278
A0A0H3C9C4	Ubiquinol-cytochrome C reductase chaperone OS=Caulobacter crescentus (strain NA1000 / CB15N) GN=CCNA_01429 PE=4 SV=1 - [A0A0H3C9C4_CAUCN]	CCNA_01429	0.995978	0.941257	1.02735	0.936324	0.983887	1.00551	1.02533	1.05494	0.99989	1.11406	0.940105	0.897522	0.971937	0.969466	0.931196	1.0411
A0A0H3C9C5	NADH-quinone oxidoreductase subunit D OS=Caulobacter crescentus (strain NA1000 / CB15N) GN=nuoD PE=3 SV=1 - [A0A0H3C9C5_CAUCN]	nuoD	1.01826	1.02032	0.995153	1.0307	0.960046	0.967773	1.02724	1.01401	0.986032	0.923093	1.01222	1.06818	1.01304	1.02321	1.06502	0.960745
A0A0H3C9C6	N-acyl-L-amino acid amidohydrolase OS=Caulobacter crescentus (strain NA1000 / CB15N) GN=CCNA_02540 PE=4 SV=1 - [A0A0H3C9C6_CAUCN]	CCNA_02540	1.03984	1.05899	1.02128	1.09032	1.11444	1.13833	0.932757	0.894996	0.898614	0.853824	1.04854	1.05246	1.04219	1.01817	0.957828	1.063
A0A0H3C9C8	Conserved hypothetical cytosolic protein OS=Caulobacter crescentus (strain NA1000 / CB15N) GN=CCNA_02249 PE=4 SV=1 - [A0A0H3C9C8_CAUCN]	CCNA_02249	0.970391	0.944385	0.89215	0.980591	1.02789	0.968053	1.00214	0.950273	1.13496	1.13397	1.01051	1.00087	1.05458	1.0877	1.01295	1.07379
A0A0H3C9D0	Response regulator receiver protein DivK OS=Caulobacter crescentus (strain NA1000 / CB15N) GN=divK PE=4 SV=1 - [A0A0H3C9D0_CAUCN]	divK	0.926608	0.951608	0.910232	0.99024	1.11574	1.03317	1.04714	1.04615	1.0261	1.05907	1.06867	0.968875	1.00094	1.01799	0.958448	1.06212
A0A0H3C9D3	Isovaleryl-CoA dehydrogenase OS=Caulobacter crescentus (strain NA1000 / CB15N) GN=CCNA_02254 PE=3 SV=1 - [A0A0H3C9D3_CAUCN]	CCNA_02254	1.14789	1.12162	1.13017	0.884708	0.867307	0.873175	0.915051	0.967082	1.01515	1.01975	0.770724	0.995495	0.946198	1.01568	1.01321	1.00244
A0A0H3C9D4	Poly(3-hydroxyalkanoate) polymerase OS=Caulobacter crescentus (strain NA1000 / CB15N) GN=CCNA_01444 PE=4 SV=1 - [A0A0H3C9D4_CAUCN]	CCNA_01444	1.02352	1.00411	1.00774	1.04138	1.09358	1.05226	0.91164	0.882525	0.957881	0.967119	1.01744	0.990448	1.03299	1.01566	0.98966	1.02627
A0A0H3C9D5	Thymidylate kinase OS=Caulobacter crescentus (strain NA1000 / CB15N) GN=tmk PE=3 SV=1 - [A0A0H3C9D5_CAUCN]	tmk	0.997583	1.08001	1.01371	0.987509	0.898641	0.987329	1.06379	1.01438	0.993239	1.03309	0.989902	0.96143	1.04871	0.984089	1.00018	0.983909
A0A0H3C9D6	ATP-dependent clp protease ATP-binding subunit ClpA OS=Caulobacter crescentus (strain NA1000 / CB15N) GN=clpA PE=3 SV=1 - [A0A0H3C9D6_CAUCN]	clpA	0.936588	0.872282	0.923647	1.18467	1.0893	1.07956	0.959098	0.879533	1.05588	1.03933	1.26488	1.01592	1.09046	1.01401	1.09737	0.924038
A0A0H3C9D7	Glutamine synthetase OS=Caulobacter crescentus (strain NA1000 / CB15N) GN=glnA PE=3 SV=1 - [A0A0H3C9D7_CAUCN]	glnA	1.02916	0.990568	1.02375	1.09533	1.07904	1.07295	1.05674	1.07354	0.82905	0.867664	1.06429	0.955496	0.984353	1.00529	1.02086	0.984744
A0A0H3C9D9	Fructose-1,6-bisphosphatase class 1 OS=Caulobacter crescentus (strain NA1000 / CB15N) GN=fbp PE=3 SV=1 - [A0A0H3C9D9_CAUCN]	fbp	1.08959	1.05091	1.09502	0.931182	0.904736	0.891758	0.953501	0.945043	1.01418	1.00844	0.854614	1.0057	1.00895	0.995046	1.04421	0.952918
A0A0H3C9E0	DNA topoisomerase 4 subunit B OS=Caulobacter crescentus (strain NA1000 / CB15N) GN=parE PE=3 SV=1 - [A0A0H3C9E0_CAUCN]	parE	0.963914	0.954038	0.967413	1.11852	1.11051	1.12795	0.952455	0.948048	0.965747	0.905375	1.1604	1.06668	1.00465	0.996382	0.991637	1.00479
A0A0H3C9E2	Enantioselective peptide amidase OS=Caulobacter crescentus (strain NA1000 / CB15N) GN=CCNA_02558 PE=4 SV=1 - [A0A0H3C9E2_CAUCN]	CCNA_02558	1.11816	1.1085	1.12003	1.03759	0.999452	0.929053	0.903415	0.911848	0.921026	0.819325	0.927944	1.12413	0.990752	0.998331	1.11683	0.893899
A0A0H3C9E7	MarR-family transcriptional regulator OS=Caulobacter crescentus (strain NA1000 / CB15N) GN=CCNA_02270 PE=4 SV=1 - [A0A0H3C9E7_CAUCN]	CCNA_02270	0.887886	1.00173	1.06076	0.886573	0.994696	0.929129	1.13267	0.999406	0.999983	1.16046	0.998521	0.861715	1.13334	0.83703	0.954198	0.877208
A0A0H3C9E8	Acyl-CoA dehydrogenase OS=Caulobacter crescentus (strain NA1000 / CB15N) GN=CCNA_02563 PE=3 SV=1 - [A0A0H3C9E8_CAUCN]	CCNA_02563	0.970483	0.920876	1.00115	0.941907	1.12801	1.04048	1.04391	1.1496	1.02619	0.946242	0.970554	1.08449	0.908069	0.969369	0.90526	1.07082
A0A0H3C9F0	Pseudouridine synthase OS=Caulobacter crescentus (strain NA1000 / CB15N) GN=CCNA_01915 PE=3 SV=1 - [A0A0H3C9F0_CAUCN]	CCNA_01915	0.926882	0.955319	0.969818	0.991521	0.949065	0.964387	1.0476	1.1486	1.02166	1.15465	1.06974	0.884823	0.912073	0.955728	1.02814	0.929573
A0A0H3C9F1	Lactate 2-monooxygenase OS=Caulobacter crescentus (strain NA1000 / CB15N) GN=CCNA_01462 PE=4 SV=1 - [A0A0H3C9F1_CAUCN]	CCNA_01462											#DIV/0!	#DIV/0!	#DIV/0!	#DIV/0!	#DIV/0!	#DIV/0!
A0A0H3C9F3	LAO/AO transport system kinase OS=Caulobacter crescentus (strain NA1000 / CB15N) GN=CCNA_02568 PE=4 SV=1 - [A0A0H3C9F3_CAUCN]	CCNA_02568	0.910182	0.921551	1.05962	1.01289	0.725966	1.50385	0.972601	1.27592	0.885847	0.945345	1.11285	0.937062	0.762275	0.858972	0.673535	1.27532
A0A0H3C9F4	Membrane alanine aminopeptidase OS=Caulobacter crescentus (strain NA1000 / CB15N) GN=CCNA_02281 PE=4 SV=1 - [A0A0H3C9F4_CAUCN]	CCNA_02281	1.10598	1.07241	1.04404	1.05014	0.974814	1.0379	0.895063	1.01154	0.981318	0.85618	0.949518	1.14616	0.884851	1.05933	1.01179	1.04698
A0A0H3C9F5	Transcription-repair-coupling factor OS=Caulobacter crescentus (strain NA1000 / CB15N) GN=mfd PE=3 SV=1 - [A0A0H3C9F5_CAUCN]	mfd	0.900615	0.883605	0.92618	1.06369	1.04776	1.04053	1.00832	1.00779	1.13436	1.07956	1.18107	1.05076	1.00053	0.972397	1.02226	0.951226
A0A0H3C9F6	Protein-export membrane protein SecF OS=Caulobacter crescentus (strain NA1000 / CB15N) GN=secF PE=3 SV=1 - [A0A0H3C9F6_CAUCN]	secF	0.996081	0.888428	1.01797	0.999598	0.999871	1.00842	1.07565	1.01348	1.00922	1.06373	1.00353	0.948756	1.06134	0.978494	0.991251	0.98713
A0A0H3C9F7	Cytochrome cbb3 oxidase subunit I ccoN OS=Caulobacter crescentus (strain NA1000 / CB15N) GN=ccoN PE=3 SV=1 - [A0A0H3C9F7_CAUCN]	ccoN	0.631749	1.28471	0.893457	1.31287	1.63392	1.8306	0.62174	0.746174	0.672812	0.520978	2.07815	1.29144	0.833237	0.707084	0.717181	0.985921
A0A0H3C9F8	Proline hydroxylase OS=Caulobacter crescentus (strain NA1000 / CB15N) GN=CCNA_02573 PE=4 SV=1 - [A0A0H3C9F8_CAUCN]	CCNA_02573	0.967814	1.04332	0.986309	0.908351	0.973275	0.849288	1.1554	1.05543	1.057	1.1019	0.93856	0.959247	1.09472	0.981249	1.06954	0.917446
A0A0H3C9G0	Aldehyde dehydrogenase OS=Caulobacter crescentus (strain NA1000 / CB15N) GN=CCNA_01925 PE=3 SV=1 - [A0A0H3C9G0_CAUCN]	CCNA_01925	0.964175	1.01072	1.00165	0.84338	0.873899	0.90271	1.08472	1.23101	1.11822	1.10339	0.874717	1.01344	0.88116	0.962587	0.934275	1.0303
A0A0H3C9G3	Cation pump-linked membrane protein fixH OS=Caulobacter crescentus (strain NA1000 / CB15N) GN=fixH PE=4 SV=1 - [A0A0H3C9G3_CAUCN]	fixH	0.840899	1.14645	1.00212	1.21871	1.18984	1.31111	0.765103	0.752109	0.931895	0.835709	1.44929	1.1151	1.01728	0.83912	0.929522	0.902744
A0A0H3C9G5	ADP-heptose LPS heptosyltransferase OS=Caulobacter crescentus (strain NA1000 / CB15N) GN=CCNA_01930 PE=4 SV=1 - [A0A0H3C9G5_CAUCN]	CCNA_01930	0.993595	1.02943	1.07014	1.02369	1.05119	0.894656	0.925745	0.853719	1.04887	1.04074	1.03029	1.00781	1.08437	0.928469	1.14423	0.811439
A0A0H3C9G6	Phosphoribosylformylglycinamidine synthase subunit PurQ OS=Caulobacter crescentus (strain NA1000 / CB15N) GN=purQ PE=3 SV=1 - [A0A0H3C9G6_CAUCN]	purQ	1.04859	0.983976	1.01384	0.957552	0.937098	0.9741	1.08332	1.04954	0.98535	1.03516	0.91318	0.951881	1.03219	1.03428	0.983012	1.05215
A0A0H3C9G7	Diaminopimelate decarboxylase OS=Caulobacter crescentus (strain NA1000 / CB15N) GN=lysA PE=3 SV=1 - [A0A0H3C9G7_CAUCN]	lysA	1.07203	1.02342	1.01986	0.992054	0.958847	0.951	1.04925	1.04153	0.983337	1.00871	0.925401	0.974849	1.00741	1.05115	1.04317	1.00765
A0A0H3C9G8	Coproporphyrinogen-III oxidase OS=Caulobacter crescentus (strain NA1000 / CB15N) GN=hemN PE=3 SV=1 - [A0A0H3C9G8_CAUCN]	hemN	0.741419	1.60298	1.57309	0.767595	1.37821	1.07802	0.650151	0.619936	0.853658	0.685127	1.03531	1.24599	1.04874	0.471313	0.71204	0.661918
A0A0H3C9G9	Anhydromuramoyl-peptide exo-beta-N-acetylglucosaminidase OS=Caulobacter crescentus (strain NA1000 / CB15N) GN=CCNA_02085 PE=4 SV=1 - [A0A0H3C9G9_CAUCN]	CCNA_02085	1.01021	0.975032	0.94546	1.04664	1.06514	0.995306	1.00399	0.957044	1.02177	1.00895	1.03607	1.0127	1.04905	1.06848	1.05158	1.01607
A0A0H3C9H0	FeS assembly SUF system protein OS=Caulobacter crescentus (strain NA1000 / CB15N) GN=CCNA_01935 PE=4 SV=1 - [A0A0H3C9H0_CAUCN]	CCNA_01935	0.9594	0.920976	0.957006	1.15012	1.09548	1.02702	0.912133	0.920871	1.08967	1.04681	1.19879	1.04095	0.990511	1.0025	1.11986	0.895203
A0A0H3C9H1	YdcF-like family protein OS=Caulobacter crescentus (strain NA1000 / CB15N) GN=CCNA_02301 PE=4 SV=1 - [A0A0H3C9H1_CAUCN]	CCNA_02301	0.958349	1.02873	0.959866	1.07277	1.1764	1.15021	0.998909	0.944011	0.915522	0.871437	1.1194	1.05059	1.05815	0.99842	0.932676	1.07049
A0A0H3C9H2	Aldo-keto reductase family protein OS=Caulobacter crescentus (strain NA1000 / CB15N) GN=CCNA_02590 PE=4 SV=1 - [A0A0H3C9H2_CAUCN]	CCNA_02590	1.00402	1.00018	1.07562	0.99994	1.06604	1.03128	0.959628	0.973765	0.976894	0.999298	0.995938	0.97758	0.985482	0.933431	0.969607	0.96269
A0A0H3C9H3	ABC transporter-associated protein SufB OS=Caulobacter crescentus (strain NA1000 / CB15N) GN=sufB PE=4 SV=1 - [A0A0H3C9H3_CAUCN]	sufB	0.974061	0.939687	0.946575	1.07333	1.03418	1.06638	0.989174	0.95902	1.01702	1.00658	1.10191	1.01037	1.03144	1.02904	1.00651	1.02238
A0A0H3C9H6	Histidinol-phosphate aminotransferase OS=Caulobacter crescentus (strain NA1000 / CB15N) GN=hisC PE=3 SV=1 - [A0A0H3C9H6_CAUCN]	hisC	1.00298	1.06921	1.05003	1.00595	0.971326	1.01172	1.0344	1.06158	0.941388	0.980959	1.00297	0.959661	0.974397	0.955191	0.994297	0.96067
A0A0H3C9H7	Uncharacterized protein OS=Caulobacter crescentus (strain NA1000 / CB15N) GN=CCNA_02597 PE=4 SV=1 - [A0A0H3C9H7_CAUCN]	CCNA_02597	0.748798	0.806785	0.845093	1.12693	1.10119	1.17985	1.18308	1.06315	1.2179	0.924066	1.50499	1.31798	1.11281	0.886054	0.955146	0.927664
A0A0H3C9H8	Anhydro-N-acetylmuramic acid kinase OS=Caulobacter crescentus (strain NA1000 / CB15N) GN=anmK PE=3 SV=1 - [A0A0H3C9H8_CAUCN]	anmK	0.937755	1.00926	0.958105	1.04355	1.04144	1.10739	1.18004	1.05697	1.0053	0.936819	1.11282	1.0731	1.11644	0.97876	0.942358	1.03863
A0A0H3C9I1	Molybdopterin-guanine dinucleotide biosynthesis protein A OS=Caulobacter crescentus (strain NA1000 / CB15N) GN=CCNA_02098 PE=4 SV=1 - [A0A0H3C9I1_CAUCN]	CCNA_02098	0.966041	0.970363	0.95833	1.08748	1.07805	1.09578	0.966578	0.936132	0.948981	0.890414	1.12571	1.06577	1.03252	1.00805	0.992428	1.01574
A0A0H3C9I2	Dihydroxyacid dehydratase OS=Caulobacter crescentus (strain NA1000 / CB15N) GN=ilvD PE=3 SV=1 - [A0A0H3C9I2_CAUCN]	ilvD	0.982576	1.07373	0.996364	0.971995	0.949987	0.993294	1.03086	1.19506	0.983672	0.945551	0.989232	1.04032	0.862599	0.986162	0.978558	1.00777
A0A0H3C9I3	N-acetylmuramoyl-L-alanine amidase OS=Caulobacter crescentus (strain NA1000 / CB15N) GN=CCNA_01952 PE=4 SV=1 - [A0A0H3C9I3_CAUCN]	CCNA_01952											#DIV/0!	#DIV/0!	#DIV/0!	#DIV/0!	#DIV/0!	#DIV/0!
A0A0H3C9I5	Isocitrate dehydrogenase [NADP] OS=Caulobacter crescentus (strain NA1000 / CB15N) GN=CCNA_02607 PE=3 SV=1 - [A0A0H3C9I5_CAUCN]	CCNA_02607	0.967941	0.948965	0.97061	1.2494	1.19712	1.21039	0.942284	0.888603	0.842165	0.87822	1.29079	0.958945	1.06041	0.99725	1.03224	0.966107
A0A0H3C9I7	Cysteine synthase OS=Caulobacter crescentus (strain NA1000 / CB15N) GN=CCNA_01493 PE=4 SV=1 - [A0A0H3C9I7_CAUCN]	CCNA_01493	0.808538	0.831655	0.842804	1.02963	0.995294	1.00657	0.972817	0.945914	1.29993	1.17834	1.27344	1.10318	1.02844	0.959343	1.02291	0.937861
A0A0H3C9I8	Acetyl-CoA carboxylase biotin carboxyl carrier protein subunit OS=Caulobacter crescentus (strain NA1000 / CB15N) GN=CCNA_01960 PE=4 SV=1 - [A0A0H3C9I8_CAUCN]	CCNA_01960	1.03492	1.03821	1.04812	0.972391	0.935278	0.961781	0.990766	1.02159	1.0189	1.01199	0.939581	1.00683	0.969822	0.987409	1.01103	0.976636
A0A0H3C9I9	O-succinylhomoserine sulfhydrylase OS=Caulobacter crescentus (strain NA1000 / CB15N) GN=metZ PE=3 SV=1 - [A0A0H3C9I9_CAUCN]	metZ	0.99541	0.986478	0.979304	1.04412	1.01542	1.03266	1.01372	1.00339	0.985512	1.02491	1.04894	0.961561	1.0103	1.01645	1.0111	1.00529
A0A0H3C9J0	Alanine--tRNA ligase OS=Caulobacter crescentus (strain NA1000 / CB15N) GN=alaS PE=3 SV=1 - [A0A0H3C9J0_CAUCN]	alaS	1.0169	0.976917	1.00434	0.99517	0.975842	0.97708	0.993905	0.996297	0.989731	1.02746	0.978632	0.963281	0.997599	1.01251	1.01851	0.9941
A0A0H3C9J2	Uncharacterized protein OS=Caulobacter crescentus (strain NA1000 / CB15N) GN=CCNA_01967 PE=4 SV=1 - [A0A0H3C9J2_CAUCN]	CCNA_01967	1.17989	1.13885	1.11629	0.911301	0.880161	0.895221	0.891332	0.963896	0.976046	1.00314	0.772361	0.972986	0.924718	1.05698	1.01796	1.03833
A0A0H3C9J4	Cell cycle regulatory protein GcrA OS=Caulobacter crescentus (strain NA1000 / CB15N) GN=gcrA PE=4 SV=1 - [A0A0H3C9J4_CAUCN]	gcrA	1.03636	0.883194	0.794935	1.06435	0.994582	0.879402	1.25158	0.928959	1.18754	1.06317	1.027	1.11698	1.34729	1.30371	1.21031	1.07717
A0A0H3C9J5	AsnC-family transcriptional regulator OS=Caulobacter crescentus (strain NA1000 / CB15N) GN=CCNA_02618 PE=4 SV=1 - [A0A0H3C9J5_CAUCN]	CCNA_02618	1.03685	0.932351	1.0944	1.05339	1.00452	1.04307	0.960004	0.97189	1.0212	0.924259	1.01595	1.10488	0.98777	0.947413	1.0099	0.938128
A0A0H3C9J6	Anthranilate synthase component I OS=Caulobacter crescentus (strain NA1000 / CB15N) GN=CCNA_01972 PE=4 SV=1 - [A0A0H3C9J6_CAUCN]	CCNA_01972	0.986518	1.03132	1.03235	1.05479	1.00726	0.990524	0.972121	0.991624	0.987718	1.02675	1.0692	0.961988	0.980332	0.955605	1.06488	0.897384
A0A0H3C9J8	ATP-dependent DNA helicase recG OS=Caulobacter crescentus (strain NA1000 / CB15N) GN=recG PE=4 SV=1 - [A0A0H3C9J8_CAUCN]	recG											#DIV/0!	#DIV/0!	#DIV/0!	#DIV/0!	#DIV/0!	#DIV/0!
A0A0H3C9J9	Transcriptional regulator of stalk biogenesis staR OS=Caulobacter crescentus (strain NA1000 / CB15N) GN=staR PE=4 SV=1 - [A0A0H3C9J9_CAUCN]	staR	0.696372	0.586643	0.476921	1.41826	1.43714	1.51806	0.966999	0.61117	1.46471	0.753156	2.03665	1.94477	1.58221	1.46014	0.934258	1.56289
A0A0H3C9K0	Cell division protein FtsA OS=Caulobacter crescentus (strain NA1000 / CB15N) GN=ftsA PE=3 SV=1 - [A0A0H3C9K0_CAUCN]	ftsA	1.05323	0.916196	0.921336	1.15808	1.0334	0.997602	1.03364	0.973307	0.959492	0.984375	1.09955	0.974723	1.06199	1.14316	1.16087	0.984744
A0A0H3C9K1	LexA repressor OS=Caulobacter crescentus (strain NA1000 / CB15N) GN=lexA PE=3 SV=1 - [A0A0H3C9K1_CAUCN]	lexA	1.01834	0.914779	0.931466	1.11296	1.07635	1.0506	0.970437	0.874706	1.03269	0.916695	1.09292	1.12654	1.10944	1.09326	1.05936	1.032
A0A0H3C9K3	Methyltransferase OS=Caulobacter crescentus (strain NA1000 / CB15N) GN=CCNA_02339 PE=4 SV=1 - [A0A0H3C9K3_CAUCN]	CCNA_02339	1.00425	0.843005	0.86864	0.978249	1.09777	1.07889	1.04952	0.926104	1.10509	1.1123	0.974105	0.993516	1.13327	1.15612	0.906719	1.27506
A0A0H3C9K7	3-oxoacyl-(Acyl-carrier-protein) synthase III OS=Caulobacter crescentus (strain NA1000 / CB15N) GN=CCNA_01509 PE=4 SV=1 - [A0A0H3C9K7_CAUCN]	CCNA_01509	0.950155	0.895537	1.03129	1.06399	1.05289	1.08537	0.907535	0.955872	1.08926	1.03834	1.11981	1.04904	0.949431	0.921331	0.980303	0.939843
A0A0H3C9K8	UDP-N-acetylmuramoyl-tripeptide--D-alanyl-D-alanine ligase OS=Caulobacter crescentus (strain NA1000 / CB15N) GN=murF PE=3 SV=1 - [A0A0H3C9K8_CAUCN]	murF	0.90953	0.929553	0.95169	1.12668	1.08709	1.15902	0.954028	0.890532	0.957321	0.947015	1.23875	1.01088	1.0713	0.955699	0.972094	0.983134
A0A0H3C9L0	Outer membrane protein assembly factor BamA OS=Caulobacter crescentus (strain NA1000 / CB15N) GN=bamA PE=3 SV=1 - [A0A0H3C9L0_CAUCN]	bamA	0.99518	1.03418	1.01855	0.957051	0.970656	0.982819	1.02946	1.05583	1.00895	1.02788	0.961686	0.981582	0.975027	0.977058	0.973781	1.00337
A0A0H3C9L1	Glucan 1,4-beta-glucosidase OS=Caulobacter crescentus (strain NA1000 / CB15N) GN=celD PE=4 SV=1 - [A0A0H3C9L1_CAUCN]	celD	0.871553	0.788135	0.816279	0.908329	0.757165	0.904381	1.96386	1.75547	0.995254	0.862198	1.0422	1.15432	1.11871	1.06772	1.00437	1.06307
A0A0H3C9L3	Dimeric ferredoxin-like protein OS=Caulobacter crescentus (strain NA1000 / CB15N) GN=CCNA_02350 PE=4 SV=1 - [A0A0H3C9L3_CAUCN]	CCNA_02350	1.02267	1.08836	1.01601	1.05492	0.962163	0.950144	0.931753	0.96474	0.940378	0.992236	1.03153	0.947737	0.965807	1.00656	1.11028	0.906585
A0A0H3C9L4	PaiB transcriptional regulator OS=Caulobacter crescentus (strain NA1000 / CB15N) GN=CCNA_02649 PE=4 SV=1 - [A0A0H3C9L4_CAUCN]	CCNA_02649											#DIV/0!	#DIV/0!	#DIV/0!	#DIV/0!	#DIV/0!	#DIV/0!
A0A0H3C9L7	Uncharacterized protein OS=Caulobacter crescentus (strain NA1000 / CB15N) GN=CCNA_01520 PE=4 SV=1 - [A0A0H3C9L7_CAUCN]	CCNA_01520	0.818148	1.05768	1.12427	1.03953	1.29338	1.32001	0.818777	0.801764	0.997001	0.820921	1.27059	1.21449	1.02122	0.727718	0.787518	0.924065
A0A0H3C9M0	Biotin-(Acetyl-CoA carboxylase) ligase OS=Caulobacter crescentus (strain NA1000 / CB15N) GN=CCNA_02014 PE=4 SV=1 - [A0A0H3C9M0_CAUCN]	CCNA_02014	0.871575	1.09526	0.901985	1.11323	1.01805	1.01392	0.958656	1.12828	0.958309	1.00291	1.27727	0.955532	0.849665	0.966286	1.09795	0.880079
A0A0H3C9M1	Two-component receiver domain protein OS=Caulobacter crescentus (strain NA1000 / CB15N) GN=CCNA_02659 PE=4 SV=1 - [A0A0H3C9M1_CAUCN]	CCNA_02659	0.996229	1.08343	1.12096	0.94393	1.0267	1.03631	0.948818	1.02662	0.96839	0.925004	0.947504	1.0469	0.924219	0.888724	0.910861	0.975697
A0A0H3C9M2	Polysaccharide biosynthesis protein celD OS=Caulobacter crescentus (strain NA1000 / CB15N) GN=CCNA_02361 PE=4 SV=1 - [A0A0H3C9M2_CAUCN]	CCNA_02361	0.912062	0.929139	0.903654	1.0339	1.06814	1.11796	1.01656	1.07717	1.04331	1.03045	1.13358	1.01248	0.94373	1.00931	0.924807	1.09137
A0A0H3C9M3	Flagellar biosynthesis regulatory protein flaF OS=Caulobacter crescentus (strain NA1000 / CB15N) GN=flaF PE=4 SV=1 - [A0A0H3C9M3_CAUCN]	flaF	1.15771	0.978838	0.768276	1.21551	1.00921	1.03953	1.06917	1.02152	0.905411	0.903356	1.04993	1.00228	1.04665	1.5069	1.16929	1.28873
A0A0H3C9M5	NADH-quinone oxidoreductase subunit I OS=Caulobacter crescentus (strain NA1000 / CB15N) GN=nuoI PE=3 SV=1 - [A0A0H3C9M5_CAUCN]	nuoI	1.01251	1.06548	1.02475	1.04587	1.00201	0.985087	0.964274	0.957011	1.05077	0.947313	1.03295	1.10921	1.00759	0.988055	1.06171	0.930631
A0A0H3C9M8	Acetyltransferase OS=Caulobacter crescentus (strain NA1000 / CB15N) GN=CCNA_01531 PE=4 SV=1 - [A0A0H3C9M8_CAUCN]	CCNA_01531	1.03813	1.13638	1.06048	1.08879	1.11794	1.07562	0.90749	0.976568	0.889748	0.805482	1.04879	1.10462	0.929264	0.978923	1.01224	0.967087
A0A0H3C9N8	Glutathione reductase OS=Caulobacter crescentus (strain NA1000 / CB15N) GN=CCNA_02387 PE=3 SV=1 - [A0A0H3C9N8_CAUCN]	CCNA_02387	0.980953	0.927174	0.928911	1.06748	1.1029	1.04887	0.934833	0.928078	1.045	0.982388	1.08821	1.06374	1.00728	1.05602	1.01775	1.03761
A0A0H3C9N9	Endoglucanase H OS=Caulobacter crescentus (strain NA1000 / CB15N) GN=CCNA_02137 PE=4 SV=1 - [A0A0H3C9N9_CAUCN]	CCNA_02137	1.04529	1.04781	1.05117	0.938019	0.926073	0.903609	1.03466	1.10391	0.987462	1.05536	0.897375	0.935664	0.937273	0.994412	1.03808	0.957934
A0A0H3C9P0	TonB-dependent receptor OS=Caulobacter crescentus (strain NA1000 / CB15N) GN=CCNA_02048 PE=3 SV=1 - [A0A0H3C9P0_CAUCN]	CCNA_02048	1.11576	1.1489	1.10793	0.887062	0.907513	0.877426	0.952523	0.970837	1.06465	0.940495	0.795029	1.13201	0.981136	1.00707	1.01098	0.996128
A0A0H3C9P1	Uncharacterized protein OS=Caulobacter crescentus (strain NA1000 / CB15N) GN=CCNA_02395 PE=4 SV=1 - [A0A0H3C9P1_CAUCN]	CCNA_02395	1.05901	1.07882	1.00773	0.945222	0.8976	0.961093	0.920081	0.982877	1.09871	1.02859	0.892552	1.06817	0.93611	1.05089	0.983487	1.06853
A0A0H3C9P5	Dimethylallyltransferase/geranyltranstransferase OS=Caulobacter crescentus (strain NA1000 / CB15N) GN=CCNA_02150 PE=3 SV=1 - [A0A0H3C9P5_CAUCN]	CCNA_02150	1.02622	1.06335	1.10344	0.901216	0.932502	0.966483	1.0499	0.985532	1.02128	0.919881	0.87819	1.11023	1.06532	0.930019	0.93247	0.997371
A0A0H3C9P6	Pseudouridine synthase OS=Caulobacter crescentus (strain NA1000 / CB15N) GN=CCNA_02059 PE=3 SV=1 - [A0A0H3C9P6_CAUCN]	CCNA_02059	1.02667	1.01271	1.0142	0.85967	0.926656	0.859897	1.02393	1.05628	1.04321	1.12632	0.837336	0.926206	0.969371	1.0123	0.999735	1.01257
A0A0H3C9P7	ABC membrane transporter, periplasmic component OS=Caulobacter crescentus (strain NA1000 / CB15N) GN=CCNA_02405 PE=4 SV=1 - [A0A0H3C9P7_CAUCN]	CCNA_02405	1.08358	1.07908	1.01728	0.98778	1.04799	1.00806	0.983027	1.06751	0.904457	0.923936	0.911593	0.978918	0.920861	1.06517	0.979882	1.08704
A0A0H3C9P9	Acylamino-acid-releasing enzyme OS=Caulobacter crescentus (strain NA1000 / CB15N) GN=CCNA_02065 PE=4 SV=1 - [A0A0H3C9P9_CAUCN]	CCNA_02065	1.0405	1.04054	1.06934	1.08569	1.09339	1.13051	0.89102	0.924358	0.873686	0.825304	1.04343	1.05862	0.963935	0.973034	0.960355	1.0132
A0A0H3C9Q1	TetR-family transcriptional regulator OS=Caulobacter crescentus (strain NA1000 / CB15N) GN=CCNA_02161 PE=4 SV=1 - [A0A0H3C9Q1_CAUCN]	CCNA_02161	1.062	1.12437	1.03652	0.94364	0.966796	0.943694	1.05451	0.978245	0.925715	0.92933	0.888552	0.99611	1.07796	1.02458	0.999942	1.02464
A0A0H3C9Q2	Glutathione S-transferase OS=Caulobacter crescentus (strain NA1000 / CB15N) GN=CCNA_02167 PE=4 SV=1 - [A0A0H3C9Q2_CAUCN]	CCNA_02167	0.955311	0.978706	0.985804	0.975508	1.00383	1.0713	0.952127	1.0498	0.989038	1.10724	1.02114	0.893249	0.906964	0.969068	0.910582	1.06423
A0A0H3C9Q4	Protein translocase subunit SecD OS=Caulobacter crescentus (strain NA1000 / CB15N) GN=secD PE=3 SV=1 - [A0A0H3C9Q4_CAUCN]	secD	0.988137	0.959857	1.0164	1.00236	0.962052	0.996103	1.00985	1.03907	1.03516	1.03105	1.01439	1.00399	0.971881	0.972198	1.00628	0.96613
A0A0H3C9Q5	Xre-family transcriptional regulator OS=Caulobacter crescentus (strain NA1000 / CB15N) GN=CCNA_02415 PE=4 SV=1 - [A0A0H3C9Q5_CAUCN]	CCNA_02415	0.882802	1.06574	0.873646	1.12701	0.990514	1.09739	1.17912	0.877368	1.09487	0.900504	1.27663	1.21584	1.34393	1.01048	1.027	0.983916
A0A0H3C9Q6	ABC transporter ATP-binding protein OS=Caulobacter crescentus (strain NA1000 / CB15N) GN=CCNA_02173 PE=4 SV=1 - [A0A0H3C9Q6_CAUCN]	CCNA_02173	1.03189	1.04968	0.988831	0.947049	0.922439	0.922422	1.17148	1.19453	1.00877	0.933483	0.917783	1.08066	0.980705	1.04354	1.0267	1.01641
A0A0H3C9Q7	Sulfate adenylyltransferase subunit 1/adenylylsulfate kinase OS=Caulobacter crescentus (strain NA1000 / CB15N) GN=CCNA_01549 PE=3 SV=1 - [A0A0H3C9Q7_CAUCN]	CCNA_01549	0.964008	1.00646	0.962868	0.899278	0.914686	0.882028	1.2151	1.11835	1.01439	1.11838	0.932853	0.90701	1.08652	1.00118	1.01956	0.98198
A0A0H3C9Q8	TonB accessory protein exbD OS=Caulobacter crescentus (strain NA1000 / CB15N) GN=exbD PE=3 SV=1 - [A0A0H3C9Q8_CAUCN]	exbD	1.11283	0.963114	1.22218	0.980055	0.945434	0.981738	1.00239	1.00702	0.898124	0.97249	0.880686	0.92353	0.995399	0.910529	0.998286	0.912092
A0A0H3C9Q9	Peptidoglycan binding endopeptidase DipM OS=Caulobacter crescentus (strain NA1000 / CB15N) GN=dipM PE=4 SV=1 - [A0A0H3C9Q9_CAUCN]	dipM	0.973699	0.984156	0.981817	1.06261	1.03773	1.0611	1.01387	0.965614	0.988972	0.98649	1.09131	1.00252	1.04997	0.991732	1.00142	0.990322
A0A0H3C9R0	Short-chain alcohol dehydrogenase OS=Caulobacter crescentus (strain NA1000 / CB15N) GN=CCNA_02178 PE=3 SV=1 - [A0A0H3C9R0_CAUCN]	CCNA_02178	0.854561	0.901545	0.962837	1.04111	0.998362	0.970743	0.925147	0.977659	1.25528	1.21036	1.2183	1.03712	0.946288	0.887545	1.07249	0.827555
A0A0H3C9R2	Ribonuclease, CafA family OS=Caulobacter crescentus (strain NA1000 / CB15N) GN=CCNA_02426 PE=4 SV=1 - [A0A0H3C9R2_CAUCN]	CCNA_02426	1.04172	0.852249	1.10864	1.03163	1.09358	1.00224	0.902544	1.02072	1.04027	0.95661	0.990313	1.08745	0.884222	0.939637	1.02932	0.912873
A0A0H3C9R3	HesB protein family OS=Caulobacter crescentus (strain NA1000 / CB15N) GN=CCNA_02088 PE=3 SV=1 - [A0A0H3C9R3_CAUCN]	CCNA_02088	0.763207	0.804273	0.775688	1.11851	1.07165	1.08921	0.825671	0.706613	1.51734	1.25284	1.46553	1.21112	1.16849	0.98391	1.02689	0.958143
A0A0H3C9R4	Competence damage-inducible protein cinA OS=Caulobacter crescentus (strain NA1000 / CB15N) GN=CCNA_02184 PE=4 SV=1 - [A0A0H3C9R4_CAUCN]	CCNA_02184	0.99533	1.01471	1.02181	0.890078	0.997462	0.9809	1.02991	1.05442	0.978079	1.10992	0.894254	0.881212	0.976759	0.974084	0.907409	1.07348
A0A0H3C9R8	Uncharacterized protein OS=Caulobacter crescentus (strain NA1000 / CB15N) GN=CCNA_02093 PE=4 SV=1 - [A0A0H3C9R8_CAUCN]	CCNA_02093	1.09267	1.07087	1.05827	1.02897	0.921762	0.977721	0.915748	0.95642	0.924569	0.863053	0.941709	1.07128	0.957475	1.03251	1.05242	0.981078
A0A0H3C9R9	Cytochrome c domain membrane protein OS=Caulobacter crescentus (strain NA1000 / CB15N) GN=CCNA_02690 PE=4 SV=1 - [A0A0H3C9R9_CAUCN]	CCNA_02690	1.1334	1.1069	1.10071	0.9373	0.886372	0.87494	1.02637	0.93316	0.883484	1.11218	0.826977	0.79437	1.09988	1.0297	1.07127	0.961195
A0A0H3C9S3	Uncharacterized protein OS=Caulobacter crescentus (strain NA1000 / CB15N) GN=CCNA_02695 PE=4 SV=1 - [A0A0H3C9S3_CAUCN]	CCNA_02695	1.0123	0.982274	1.08489	0.966816	0.982457	1.04026	0.997957	0.92453	0.971103	1.06327	0.955068	0.913315	1.07942	0.933087	0.929402	1.00397
A0A0H3C9S6	Fumarate hydratase class II OS=Caulobacter crescentus (strain NA1000 / CB15N) GN=fumC PE=3 SV=1 - [A0A0H3C9S6_CAUCN]	fumC	0.985408	0.943124	0.951891	1.07397	1.06895	1.03924	0.987481	0.959829	0.973601	1.08177	1.08988	0.900006	1.02881	1.03521	1.03342	1.00173
A0A0H3C9S7	Xanthine dehydrogenase accessory protein XdhC OS=Caulobacter crescentus (strain NA1000 / CB15N) GN=CCNA_02700 PE=4 SV=1 - [A0A0H3C9S7_CAUCN]	CCNA_02700	1.10019	1.07848	1.01407	1.08449	0.935698	0.935428	1.00455	1.0085	1.03048	0.844556	0.985731	1.22014	0.99609	1.08493	1.15936	0.935802
A0A0H3C9S8	Carboxymethylenebutenolidase OS=Caulobacter crescentus (strain NA1000 / CB15N) GN=CCNA_02443 PE=4 SV=1 - [A0A0H3C9S8_CAUCN]	CCNA_02443	1.06491	1.08328	1.01659	0.903559	0.891243	0.921221	1.08569	1.09864	1.04521	0.971139	0.848482	1.07628	0.988207	1.04754	0.980828	1.06801
A0A0H3C9T1	Methyltransferase OS=Caulobacter crescentus (strain NA1000 / CB15N) GN=CCNA_02199 PE=4 SV=1 - [A0A0H3C9T1_CAUCN]	CCNA_02199	1.06978	1.08102	0.99061	1.09497	0.930682	1.05993	0.946398	0.946049	0.966519	0.902283	1.02355	1.07119	1.00037	1.07992	1.03306	1.04536
A0A0H3C9T3	Uncharacterized protein OS=Caulobacter crescentus (strain NA1000 / CB15N) GN=CCNA_02449 PE=4 SV=1 - [A0A0H3C9T3_CAUCN]	CCNA_02449	1.11873	1.03834	1.13242	0.925582	1.02676	0.931101	0.995771	0.919172	0.996183	0.994938	0.827353	1.00125	1.08333	0.987909	0.994073	0.993799
A0A0H3C9T4	Phosphate-binding protein OS=Caulobacter crescentus (strain NA1000 / CB15N) GN=CCNA_01583 PE=4 SV=1 - [A0A0H3C9T4_CAUCN]	CCNA_01583	0.98973	0.989206	1.00867	0.933166	0.951834	0.929768	1.04558	1.08246	1.02431	1.10401	0.942849	0.927814	0.965925	0.981221	1.00365	0.977648
A0A0H3C9T5	PilF-related tetratricopeptide repeat protein OS=Caulobacter crescentus (strain NA1000 / CB15N) GN=CCNA_02111 PE=4 SV=1 - [A0A0H3C9T5_CAUCN]	CCNA_02111	1.11992	1.13258	1.10422	0.964087	0.999102	0.962656	0.872291	0.924371	1.00025	0.896689	0.860852	1.11549	0.943659	1.01422	1.00149	1.01272
A0A0H3C9T6	Uncharacterized protein OS=Caulobacter crescentus (strain NA1000 / CB15N) GN=CCNA_02205 PE=4 SV=1 - [A0A0H3C9T6_CAUCN]	CCNA_02205	0.677385	0.678826	0.68024	1.40893	1.293	1.1199	1.56658	1.07439	1.17079	0.683544	2.07995	1.71283	1.45811	0.995802	1.25809	0.791521
A0A0H3C9T7	Holdfast attachment protein hfaB OS=Caulobacter crescentus (strain NA1000 / CB15N) GN=hfaB PE=4 SV=1 - [A0A0H3C9T7_CAUCN]	hfaB	1.22895	1.14984	1.08226	0.881392	0.805185	0.799611	1.02262	1.15651	0.909838	0.987523	0.717194	0.921333	0.884229	1.13553	1.10228	1.03017
A0A0H3C9T9	N-methylhydantoinase HyuB OS=Caulobacter crescentus (strain NA1000 / CB15N) GN=CCNA_02454 PE=4 SV=1 - [A0A0H3C9T9_CAUCN]	CCNA_02454	0.984404	0.999194	1.00861	1.05879	0.963385	0.924692	0.885086	0.928637	0.986304	1.03795	1.07557	0.950241	0.953102	0.975998	1.14502	0.852383
A0A0H3C9U0	Dihydrofolate reductase OS=Caulobacter crescentus (strain NA1000 / CB15N) GN=CCNA_02210 PE=3 SV=1 - [A0A0H3C9U0_CAUCN]	CCNA_02210	0.931869	1.15929	0.943692	1.06521	1.06482	1.01707	1.02053	1.04829	0.910157	1.0099	1.14309	0.901234	0.973516	0.987472	1.04734	0.942842
A0A0H3C9U1	Maltose/maltodextrin transport ATP-binding protein malK OS=Caulobacter crescentus (strain NA1000 / CB15N) GN=malK PE=4 SV=1 - [A0A0H3C9U1_CAUCN]	malK	0.921982	0.852122	0.914257	1.01075	0.981848	1.21385	1.17531	0.933212	1.23583	0.878572	1.09628	1.40664	1.25942	1.00845	0.832678	1.21109
A0A0H3C9U3	Ribosomal protein L11 methyltransferase OS=Caulobacter crescentus (strain NA1000 / CB15N) GN=prmA PE=3 SV=1 - [A0A0H3C9U3_CAUCN]	prmA	1.00935	1.03222	1.05581	0.975615	1.02215	0.95917	1.08665	1.04677	0.972951	1.01685	0.966578	0.956833	1.03809	0.955996	1.01714	0.939881
A0A0H3C9U4	Methylmalonyl-CoA mutase alpha subunit OS=Caulobacter crescentus (strain NA1000 / CB15N) GN=CCNA_02459 PE=4 SV=1 - [A0A0H3C9U4_CAUCN]	CCNA_02459	1.14373	1.09838	1.13046	0.896515	0.899741	0.845355	0.900782	0.972224	1.03087	1.02226	0.783855	1.00843	0.926517	1.01173	1.06052	0.953996
A0A0H3C9U5	Acyl-CoA dehydrogenase OS=Caulobacter crescentus (strain NA1000 / CB15N) GN=CCNA_02215 PE=3 SV=1 - [A0A0H3C9U5_CAUCN]	CCNA_02215	1.07003	0.909444	1.07832	0.893129	1.07811	0.90455	0.985134	1.02587	1.13665	0.974618	0.834677	1.16625	0.960287	0.992312	0.987374	1.005
A0A0H3C9U7	ATP-dependent helicase OS=Caulobacter crescentus (strain NA1000 / CB15N) GN=CCNA_02121 PE=4 SV=1 - [A0A0H3C9U7_CAUCN]	CCNA_02121	0.946062	0.881049	0.911758	1.11347	1.12945	1.16629	0.943515	1.09865	1.05177	1.0242	1.17695	1.02692	0.858797	1.03762	0.954708	1.08685
A0A0H3C9U8	UDP-glucose 6-dehydrogenase OS=Caulobacter crescentus (strain NA1000 / CB15N) GN=CCNA_02465 PE=3 SV=1 - [A0A0H3C9U8_CAUCN]	CCNA_02465	1.00859	0.877345	0.949466	0.977361	1.03891	1.00263	1.08725	1.15766	0.980877	1.07896	0.969042	0.909092	0.93918	1.06227	0.974796	1.08973
A0A0H3C9V2	Oxacillin resistance-associated protein fmtC OS=Caulobacter crescentus (strain NA1000 / CB15N) GN=CCNA_02127 PE=4 SV=1 - [A0A0H3C9V2_CAUCN]	CCNA_02127	1.10718	1.06783	0.931158	1.03849	1.04268	1.03503	1.10678	0.958132	0.878972	0.822262	0.937961	1.06897	1.15514	1.18904	1.00335	1.18507
A0A0H3C9V5	Uncharacterized protein OS=Caulobacter crescentus (strain NA1000 / CB15N) GN=CCNA_02732 PE=4 SV=1 - [A0A0H3C9V5_CAUCN]	CCNA_02732	1.0151	1.01045	1.0139	1.27439	1.20241	1.22666	0.924324	0.738601	0.875499	0.726827	1.25543	1.20455	1.25145	1.00118	1.03891	0.963687
A0A0H3C9V6	ArsR family/SAM-dependent transcriptional regulator OS=Caulobacter crescentus (strain NA1000 / CB15N) GN=CCNA_02225 PE=4 SV=1 - [A0A0H3C9V6_CAUCN]	CCNA_02225	1.09422	1.0529	1.07473	1.00084	0.974155	0.960313	1.02091	0.959479	0.961732	0.936429	0.914658	1.02702	1.06402	1.01813	1.0422	0.976908
A0A0H3C9V7	LacI-family transcriptional regulator OS=Caulobacter crescentus (strain NA1000 / CB15N) GN=CCNA_02132 PE=4 SV=1 - [A0A0H3C9V7_CAUCN]	CCNA_02132	0.940495	1.00485	0.967124	0.960244	0.97591	0.934212	1.46317	1.29272	0.945562	0.875894	1.021	1.07954	1.13185	0.972466	1.02787	0.946103
A0A0H3C9V9	Transcriptional regulator vanR OS=Caulobacter crescentus (strain NA1000 / CB15N) GN=vanR PE=4 SV=1 - [A0A0H3C9V9_CAUCN]	vanR	0.669	0.695229	0.730152	0.704486	0.682443	0.746023	0.762267	0.837509	1.00836	2.92946	1.05304	0.344213	0.91016	0.916248	0.944321	0.970272
A0A0H3C9W0	3-ketoacyl-(Acyl-carrier-protein) reductase OS=Caulobacter crescentus (strain NA1000 / CB15N) GN=CCNA_02738 PE=4 SV=1 - [A0A0H3C9W0_CAUCN]	CCNA_02738	0.938639	0.932847	0.961556	1.07035	1.02051	0.936841	0.979506	0.957395	1.08444	1.15268	1.14032	0.940796	1.02309	0.976166	1.14251	0.854407
A0A0H3C9W1	Gluconate 2-dehydrogenase OS=Caulobacter crescentus (strain NA1000 / CB15N) GN=CCNA_02230 PE=3 SV=1 - [A0A0H3C9W1_CAUCN]	CCNA_02230	0.958086	1.08878	0.953637	0.96906	1.12551	1.00667	0.955505	0.974379	1.04598	1.04039	1.01145	1.00538	0.980629	1.00466	0.962635	1.04366
A0A0H3C9W3	Rod shape-determining protein RodA OS=Caulobacter crescentus (strain NA1000 / CB15N) GN=rodA PE=3 SV=1 - [A0A0H3C9W3_CAUCN]	rodA	0.968096	0.862861	1.09008	1.1058	1.04978	1.09965	1.01691	1.05879	0.904712	0.963854	1.14225	0.93864	0.96045	0.888098	1.0056	0.883155
A0A0H3C9W4	TonB dependent receptor OS=Caulobacter crescentus (strain NA1000 / CB15N) GN=CCNA_02743 PE=3 SV=1 - [A0A0H3C9W4_CAUCN]	CCNA_02743	0.888311	0.940703	0.884297	0.84532	0.887187	0.890214	1.34269	1.37296	1.16136	1.12798	0.951604	1.02959	0.977953	1.00454	0.94957	1.05789
A0A0H3C9W6	Rsh ppGpp hydrolase-synthetase OS=Caulobacter crescentus (strain NA1000 / CB15N) GN=spoT PE=3 SV=1 - [A0A0H3C9W6_CAUCN]	spoT	0.947464	0.95637	0.967112	1.13047	1.10288	1.11578	1.0383	1.01111	0.884655	0.93535	1.19315	0.9458	1.02689	0.979684	1.01317	0.966953
A0A0H3C9W9	Aminoacyl peptidase OS=Caulobacter crescentus (strain NA1000 / CB15N) GN=CCNA_02753 PE=4 SV=1 - [A0A0H3C9W9_CAUCN]	CCNA_02753	0.988223	1.00135	1.07115	0.926398	1.04181	1.0243	0.974202	1.00117	0.985842	0.935398	0.937439	1.05393	0.973069	0.922579	0.904423	1.02008
A0A0H3C9X0	Glycerophosphoryl diester phosphodiesterase OS=Caulobacter crescentus (strain NA1000 / CB15N) GN=CCNA_02240 PE=4 SV=1 - [A0A0H3C9X0_CAUCN]	CCNA_02240	0.854885	1.02138	0.913146	1.12444	1.11653	1.14352	0.912095	0.822764	1.0017	1.0008	1.31531	1.0009	1.10857	0.936197	0.983309	0.952088
A0A0H3C9X3	Methionine aminopeptidase OS=Caulobacter crescentus (strain NA1000 / CB15N) GN=map PE=3 SV=1 - [A0A0H3C9X3_CAUCN]	map	0.960573	0.963823	1.02893	0.957321	0.989361	0.975132	1.0594	1.01303	1.05594	1.05017	0.996615	1.00549	1.04577	0.933566	0.981735	0.950934
A0A0H3C9X4	Beta-lactamase family protein OS=Caulobacter crescentus (strain NA1000 / CB15N) GN=CCNA_01639 PE=4 SV=1 - [A0A0H3C9X4_CAUCN]	CCNA_01639	0.97027	0.971023	0.927231	1.05103	0.995856	1.06215	0.826606	1.0234	1.11494	1.01406	1.08323	1.09948	0.807707	1.04642	0.989527	1.05749
A0A0H3C9X5	DnaJ domain protein OS=Caulobacter crescentus (strain NA1000 / CB15N) GN=CCNA_02245 PE=4 SV=1 - [A0A0H3C9X5_CAUCN]	CCNA_02245	0.968715	0.956436	0.98947	0.935986	1.12142	0.961702	1.16198	1.0817	1.07971	0.906593	0.966214	1.19095	1.07421	0.979024	0.97326	1.00592
A0A0H3C9X7	3-hydroxyisobutyrate dehydrogenase OS=Caulobacter crescentus (strain NA1000 / CB15N) GN=CCNA_01645 PE=4 SV=1 - [A0A0H3C9X7_CAUCN]	CCNA_01645	0.989784	0.967544	0.974527	1.08332	1.08205	1.08383	0.995003	0.944618	0.947608	0.957742	1.09451	0.989418	1.05334	1.01566	0.99953	1.01613
A0A0H3C9X8	Methylcrotonyl-CoA carboxylase biotin-containing subunit OS=Caulobacter crescentus (strain NA1000 / CB15N) GN=CCNA_02250 PE=4 SV=1 - [A0A0H3C9X8_CAUCN]	CCNA_02250	1.08576	1.05328	1.08514	0.977492	0.977998	0.989675	0.97222	0.963049	0.983342	0.910347	0.900285	1.08018	1.00952	1.00057	0.987691	1.01304
A0A0H3C9Y1	Peptidyl-prolyl cis-trans isomerase OS=Caulobacter crescentus (strain NA1000 / CB15N) GN=CCNA_01653 PE=3 SV=1 - [A0A0H3C9Y1_CAUCN]	CCNA_01653	1.00303	0.974326	1.0016	0.916404	0.949862	0.962087	0.981876	0.998836	1.06895	1.1759	0.913633	0.909055	0.98302	1.00144	0.952517	1.05136
A0A0H3C9Y2	Uncharacterized protein OS=Caulobacter crescentus (strain NA1000 / CB15N) GN=CCNA_02138 PE=4 SV=1 - [A0A0H3C9Y2_CAUCN]	CCNA_02138	1.09067	1.01433	0.934125	0.985546	0.893485	0.916231	1.14033	1.09306	0.932971	0.992243	0.903613	0.940264	1.04325	1.16759	1.07565	1.08547
A0A0H3C9Y4	Lysozyme OS=Caulobacter crescentus (strain NA1000 / CB15N) GN=spmX PE=3 SV=1 - [A0A0H3C9Y4_CAUCN]	spmX	1.14641	1.09748	1.10901	0.950542	0.940443	0.840242	1.05157	1.0405	0.995406	0.878799	0.829145	1.13269	1.01063	1.03373	1.13127	0.913772
A0A0H3C9Y5	Type IV secretory pathway, VirB11 ATPase OS=Caulobacter crescentus (strain NA1000 / CB15N) GN=CCNA_02505 PE=4 SV=1 - [A0A0H3C9Y5_CAUCN]	CCNA_02505	1.00835	1.07796	1.12348	0.994474	1.07116	0.996167	0.97721	0.966821	0.97958	0.834684	0.986243	1.17359	1.01075	0.89752	0.998301	0.899048
A0A0H3C9Y6	Uncharacterized protein OS=Caulobacter crescentus (strain NA1000 / CB15N) GN=CCNA_02774 PE=4 SV=1 - [A0A0H3C9Y6_CAUCN]	CCNA_02774	1.18035	1.23589	1.23726	0.868339	0.859785	0.807913	1.11342	1.09354	0.9908	0.817491	0.735661	1.212	1.01818	0.954006	1.07479	0.887619
A0A0H3C9Y7	Queuine tRNA-ribosyltransferase OS=Caulobacter crescentus (strain NA1000 / CB15N) GN=tgt PE=3 SV=1 - [A0A0H3C9Y7_CAUCN]	tgt	1.00357	1.08407	1.03889	0.919962	0.93026	1.02412	0.989898	1.03107	0.951052	1.07915	0.916694	0.881296	0.960067	0.965993	0.898294	1.07536
A0A0H3C9Y8	Flagellar L-ring protein OS=Caulobacter crescentus (strain NA1000 / CB15N) GN=flgH PE=3 SV=1 - [A0A0H3C9Y8_CAUCN]	flgH	1.08076	1.11174	1.17721	0.842114	0.836564	0.798579	1.13731	1.06841	0.993134	1.02539	0.779185	0.968546	1.06448	0.91807	1.05452	0.870608
A0A0H3C9Y9	Conserved hypothetical membrane protein OS=Caulobacter crescentus (strain NA1000 / CB15N) GN=CCNA_02260 PE=4 SV=1 - [A0A0H3C9Y9_CAUCN]	CCNA_02260	0.983545	0.945573	0.995103	1.13506	1.06231	1.07107	0.965473	1.05425	0.938964	0.945412	1.15405	0.99318	0.915789	0.988385	1.05974	0.932668
A0A0H3C9Z2	Phosphoglycerate mutase OS=Caulobacter crescentus (strain NA1000 / CB15N) GN=CCNA_02152 PE=4 SV=1 - [A0A0H3C9Z2_CAUCN]	CCNA_02152	1.07515	1.07041	0.973655	0.842402	0.86712	0.981221	1.06022	1.3728	0.987413	0.972917	0.783523	1.0149	0.772309	1.10424	0.858524	1.2862
A0A0H3C9Z6	HipB-family transcriptional regulator OS=Caulobacter crescentus (strain NA1000 / CB15N) GN=CCNA_02157 PE=4 SV=1 - [A0A0H3C9Z6_CAUCN]	CCNA_02157											#DIV/0!	#DIV/0!	#DIV/0!	#DIV/0!	#DIV/0!	#DIV/0!
A0A0H3C9Z8	AlphaE superfamily protein OS=Caulobacter crescentus (strain NA1000 / CB15N) GN=CCNA_01673 PE=4 SV=1 - [A0A0H3C9Z8_CAUCN]	CCNA_01673	1.31433	1.11313	1.02592	0.96005	0.881825	0.96177	1.00637	1.12927	0.878113	0.727146	0.730446	1.20762	0.891171	1.28112	0.998211	1.28342
A0A0H3C9Z9	Stalk cross-band protein StpD OS=Caulobacter crescentus (strain NA1000 / CB15N) GN=stpD PE=4 SV=1 - [A0A0H3C9Z9_CAUCN]	stpD	1.08964	1.20467	1.14282	0.897257	0.924358	0.944429	1.01206	1.02752	0.966538	0.950951	0.823443	1.01639	0.984954	0.953469	0.950053	1.0036
A0A0H3CA02	Uncharacterized protein OS=Caulobacter crescentus (strain NA1000 / CB15N) GN=CCNA_02523 PE=4 SV=1 - [A0A0H3CA02_CAUCN]	CCNA_02523	1.04739	1.10002	1.02116	0.948206	0.904315	0.964901	1.17856	1.22198	0.901729	0.901598	0.905301	1.00015	0.964471	1.02569	0.982698	1.04375
A0A0H3CA03	Arginine N-succinyltransferase, beta chain OS=Caulobacter crescentus (strain NA1000 / CB15N) GN=CCNA_01678 PE=4 SV=1 - [A0A0H3CA03_CAUCN]	CCNA_01678	0.993664	1.05566	0.948593	1.04111	1.0949	1.11542	1.00647	0.907173	0.928826	0.871854	1.04775	1.06535	1.10946	1.04751	0.933383	1.12228
A0A0H3CA05	Thioesterase superfamily protein OS=Caulobacter crescentus (strain NA1000 / CB15N) GN=CCNA_02169 PE=4 SV=1 - [A0A0H3CA05_CAUCN]	CCNA_02169											#DIV/0!	#DIV/0!	#DIV/0!	#DIV/0!	#DIV/0!	#DIV/0!
A0A0H3CA07	SAM-dependent methyltransferase OS=Caulobacter crescentus (strain NA1000 / CB15N) GN=CCNA_02530 PE=4 SV=1 - [A0A0H3CA07_CAUCN]	CCNA_02530	0.952262	1.14325	1.00912	1.09403	1.10508	1.0958	0.912827	0.958764	0.873162	0.909985	1.14887	0.959535	0.952088	0.943655	0.998382	0.945184
A0A0H3CA08	Multidrug resistance efflux pump OS=Caulobacter crescentus (strain NA1000 / CB15N) GN=CCNA_02174 PE=4 SV=1 - [A0A0H3CA08_CAUCN]	CCNA_02174	1.1377	1.10035	1.0549	0.918004	0.883373	0.851261	1.21509	1.19936	0.934319	0.933903	0.806897	1.00045	1.01311	1.07849	1.0784	1.00008
A0A0H3CA12	DNA topoisomerase 1 OS=Caulobacter crescentus (strain NA1000 / CB15N) GN=topA PE=3 SV=1 - [A0A0H3CA12_CAUCN]	topA	1.03267	1.00626	1.00299	0.893529	0.900741	0.891054	1.08064	1.04922	1.10217	1.06553	0.865265	1.03438	1.02995	1.02959	1.00278	1.02674
A0A0H3CA13	Long-chain fatty acid transport protein OS=Caulobacter crescentus (strain NA1000 / CB15N) GN=CCNA_02179 PE=4 SV=1 - [A0A0H3CA13_CAUCN]	CCNA_02179	1.12688	1.13502	1.10052	0.840755	0.861281	0.842673	1.08413	1.17843	0.954047	0.968851	0.746091	0.98472	0.919975	1.02395	0.997723	1.02629
A0A0H3CA14	Nickel-cobalt-cadmium resistance protein NccC OS=Caulobacter crescentus (strain NA1000 / CB15N) GN=CCNA_02806 PE=4 SV=1 - [A0A0H3CA14_CAUCN]	CCNA_02806	1.36165	1.43099	1.34072	0.62674	0.690192	0.572588	1.31058	1.69202	0.601783	0.697262	0.460282	0.863066	0.774567	1.01561	1.09457	0.927856
A0A0H3CA15	Potassium channel protein OS=Caulobacter crescentus (strain NA1000 / CB15N) GN=CCNA_01688 PE=4 SV=1 - [A0A0H3CA15_CAUCN]	CCNA_01688	1.01909	0.984582	1.06016	0.99	1.01922	1.01589	0.957465	0.958787	1.02764	0.987904	0.971453	1.04022	0.99862	0.961262	0.974518	0.986397
A0A0H3CA16	TetR-family transcriptional regulator OS=Caulobacter crescentus (strain NA1000 / CB15N) GN=CCNA_02287 PE=4 SV=1 - [A0A0H3CA16_CAUCN]	CCNA_02287	1.04019	1.0745	0.990295	0.952642	0.977815	0.948013	0.968316	0.992268	1.00662	1.05331	0.915838	0.955679	0.975861	1.05038	1.00488	1.04528
A0A0H3CA17	Acetolactate synthase OS=Caulobacter crescentus (strain NA1000 / CB15N) GN=CCNA_02185 PE=3 SV=1 - [A0A0H3CA17_CAUCN]	CCNA_02185	0.905117	0.937116	0.954016	1.12253	1.1438	1.20604	0.951365	0.97059	0.930928	0.970931	1.24021	0.9588	0.980192	0.948743	0.93076	1.01932
A0A0H3CA18	MutT/nudix family phosphohydrolase OS=Caulobacter crescentus (strain NA1000 / CB15N) GN=CCNA_02541 PE=4 SV=1 - [A0A0H3CA18_CAUCN]	CCNA_02541	0.922344	0.905356	1.01199	1.01179	1.08041	1.05114	0.989126	0.96468	1.02621	1.09643	1.09698	0.935959	1.02534	0.911419	0.962565	0.946865
A0A0H3CA20	Acetyltransferase OS=Caulobacter crescentus (strain NA1000 / CB15N) GN=CCNA_02292 PE=4 SV=1 - [A0A0H3CA20_CAUCN]	CCNA_02292	1.02339	1.08219	1.22913	0.837007	0.863755	0.875656	0.93756	1.20952	0.99656	1.03587	0.817877	0.962054	0.775148	0.832617	0.955863	0.871063
A0A0H3CA22	Penicillin-binding protein OS=Caulobacter crescentus (strain NA1000 / CB15N) GN=CCNA_02190 PE=4 SV=1 - [A0A0H3CA22_CAUCN]	CCNA_02190	0.998405	0.971424	1.05875	1.08323	1.02452	1.0253	0.955207	0.864736	0.958114	0.939367	1.08496	1.01996	1.10462	0.943	1.0565	0.892569
A0A0H3CA24	Uncharacterized protein OS=Caulobacter crescentus (strain NA1000 / CB15N) GN=CCNA_02548 PE=4 SV=1 - [A0A0H3CA24_CAUCN]	CCNA_02548	0.99994	0.892433	0.949132	1.14228	1.14543	1.11195	0.933343	0.914655	0.98613	0.939396	1.14235	1.04975	1.02043	1.05353	1.02728	1.02556
A0A0H3CA25	Hypoxanthine-guanine phosphoribosyltransferase OS=Caulobacter crescentus (strain NA1000 / CB15N) GN=CCNA_02297 PE=4 SV=1 - [A0A0H3CA25_CAUCN]	CCNA_02297	1.00862	1.04506	0.999893	1.01962	1.00702	1.00185	0.965629	0.929568	1.02165	0.987841	1.01091	1.03422	1.03879	1.00872	1.01774	0.991144
A0A0H3CA27	HipA-related phosphatidylinositol 3/4-kinase OS=Caulobacter crescentus (strain NA1000 / CB15N) GN=CCNA_02821 PE=4 SV=1 - [A0A0H3CA27_CAUCN]	CCNA_02821	1.27079	0.902925	1.21219	0.760377	0.861926	0.822217	1.11521	1.35203	1.03032	0.840869	0.598351	1.22531	0.824842	1.04834	0.924789	1.1336
A0A0H3CA31	Cytochrome c OS=Caulobacter crescentus (strain NA1000 / CB15N) GN=CCNA_01704 PE=4 SV=1 - [A0A0H3CA31_CAUCN]	CCNA_01704	1.08913	1.00044	1.01229	0.905322	0.914778	0.955884	0.943049	1.00604	1.0352	1.10451	0.831235	0.937251	0.937392	1.0759	0.947104	1.13599
A0A0H3CA35	Cyclohexadienyl dehydrogenase OS=Caulobacter crescentus (strain NA1000 / CB15N) GN=CCNA_02307 PE=4 SV=1 - [A0A0H3CA35_CAUCN]	CCNA_02307	0.975545	1.05449	0.983069	1.02757	1.01022	1.00584	0.980513	0.997467	0.964776	0.978475	1.05333	0.985999	0.983004	0.992346	1.02161	0.971358
A0A0H3CA37	Uncharacterized protein OS=Caulobacter crescentus (strain NA1000 / CB15N) GN=CCNA_02831 PE=4 SV=1 - [A0A0H3CA37_CAUCN]	CCNA_02831	1.07039	0.982291	1.05682	0.962407	1.04544	0.864135	1.17194	1.17756	0.912321	0.915102	0.899116	0.996961	0.995227	1.01284	1.11372	0.909419
A0A0H3CA39	Uncharacterized protein OS=Caulobacter crescentus (strain NA1000 / CB15N) GN=CCNA_02206 PE=4 SV=1 - [A0A0H3CA39_CAUCN]	CCNA_02206	0.94979	0.995435	0.981358	0.963367	0.951846	0.997362	1.0004	0.943251	1.05383	1.05569	1.0143	0.99824	1.06059	0.967833	0.965916	1.00198
A0A0H3CA40	Spx/MgsR-related protein OS=Caulobacter crescentus (strain NA1000 / CB15N) GN=CCNA_01714 PE=3 SV=1 - [A0A0H3CA40_CAUCN]	CCNA_01714	0.912105	1.02142	0.956057	1.10828	1.11456	1.13363	0.953237	0.873224	1.02404	0.91462	1.21508	1.11963	1.09163	0.954028	0.97764	0.975847
A0A0H3CA41	Uncharacterized protein OS=Caulobacter crescentus (strain NA1000 / CB15N) GN=CCNA_02836 PE=4 SV=1 - [A0A0H3CA41_CAUCN]	CCNA_02836	0.966491	0.881166	1.00596	0.857971	1.00537	0.899258	1.03962	0.956688	1.20279	1.2169	0.887717	0.988404	1.08669	0.960766	0.954088	1.007
A0A0H3CA42	TraB superfamily protein OS=Caulobacter crescentus (strain NA1000 / CB15N) GN=CCNA_02312 PE=4 SV=1 - [A0A0H3CA42_CAUCN]	CCNA_02312	1.01936	1.06165	0.975777	0.99766	0.897375	0.957224	1.15069	1.23455	1.00441	0.942219	0.978717	1.066	0.932078	1.04466	1.04224	1.00232
A0A0H3CA43	Zinc ribbon domain protein OS=Caulobacter crescentus (strain NA1000 / CB15N) GN=CCNA_02211 PE=4 SV=1 - [A0A0H3CA43_CAUCN]	CCNA_02211	1.01327	1.04248	1.03918	1.04369	1.0445	1.02682	0.931849	0.943061	0.966691	0.999094	1.03002	0.967567	0.988111	0.975073	1.01644	0.959305
A0A0H3CA44	Glutathione S-transferase OS=Caulobacter crescentus (strain NA1000 / CB15N) GN=CCNA_02569 PE=4 SV=1 - [A0A0H3CA44_CAUCN]	CCNA_02569	1.09327	1.10325	1.12354	0.945997	0.984378	0.971571	1.02904	1.08525	0.84704	0.905535	0.865292	0.935404	0.948208	0.97306	0.973677	0.999367
A0A0H3CA45	ABM family monooxygenase OS=Caulobacter crescentus (strain NA1000 / CB15N) GN=CCNA_02216 PE=4 SV=1 - [A0A0H3CA45_CAUCN]	CCNA_02216	0.985854	0.922638	0.999421	1.03192	1.00333	0.998403	0.775743	0.882231	1.20783	1.10987	1.04673	1.08826	0.879297	0.986425	1.03357	0.954386
A0A0H3CA50	Methionine synthase I metH OS=Caulobacter crescentus (strain NA1000 / CB15N) GN=CCNA_02221 PE=4 SV=1 - [A0A0H3CA50_CAUCN]	CCNA_02221	1.04798	1.03132	1.00822	1.04487	1.00637	1.02642	1.02152	1.0726	0.931753	0.943872	0.997029	0.98716	0.952383	1.03944	1.01797	1.02109
A0A0H3CA51	DegP/HtrA-family serine protease OS=Caulobacter crescentus (strain NA1000 / CB15N) GN=CCNA_02846 PE=4 SV=1 - [A0A0H3CA51_CAUCN]	CCNA_02846	0.980971	0.983699	0.945212	0.934025	0.899227	0.900926	0.980239	0.941833	1.2125	1.17125	0.952143	1.03521	1.04078	1.03783	1.03674	1.00106
A0A0H3CA54	Uncharacterized protein OS=Caulobacter crescentus (strain NA1000 / CB15N) GN=CCNA_02852 PE=4 SV=1 - [A0A0H3CA54_CAUCN]	CCNA_02852	1.11147	0.861801	0.891191	1.23801	0.939702	1.09829	1.04531	0.981619	0.858332	1.02921	1.11385	0.833969	1.06488	1.24717	1.12722	1.10642
A0A0H3CA55	GTPase Der OS=Caulobacter crescentus (strain NA1000 / CB15N) GN=der PE=3 SV=1 - [A0A0H3CA55_CAUCN]	der	1.00957	1.05487	0.971325	0.9679	0.926482	0.890033	1.02144	1.13671	0.999396	1.04656	0.958725	0.954931	0.898598	1.03937	1.08749	0.955757
A0A0H3CA56	HipA-family phosphatidylinositol 3/4-kinase OS=Caulobacter crescentus (strain NA1000 / CB15N) GN=CCNA_02858 PE=4 SV=1 - [A0A0H3CA56_CAUCN]	CCNA_02858											#DIV/0!	#DIV/0!	#DIV/0!	#DIV/0!	#DIV/0!	#DIV/0!
A0A0H3CA57	Protein ApaG OS=Caulobacter crescentus (strain NA1000 / CB15N) GN=apaG PE=3 SV=1 - [A0A0H3CA57_CAUCN]	apaG	0.932623	0.897765	0.84067	1.1442	1.2437	1.23657	0.895098	0.998398	1.03522	0.885625	1.22686	1.16891	0.896534	1.10938	0.925304	1.19894
A0A0H3CA58	Phosphoribosylformylglycinamidine synthase subunit PurL OS=Caulobacter crescentus (strain NA1000 / CB15N) GN=purL PE=3 SV=1 - [A0A0H3CA58_CAUCN]	purL	0.994363	0.960487	0.971753	1.0278	1.01652	1.03301	1.03329	0.996588	0.965011	1.03904	1.03363	0.92875	1.03683	1.02327	0.994957	1.02845
A0A0H3CA59	ABC transporter ATP-binding protein OS=Caulobacter crescentus (strain NA1000 / CB15N) GN=CCNA_02231 PE=4 SV=1 - [A0A0H3CA59_CAUCN]	CCNA_02231	0.989253	0.946633	0.964245	1.03488	1.02874	1.02889	1.04754	1.02121	0.991211	1.03107	1.04612	0.961347	1.02579	1.02594	1.00582	1.02
A0A0H3CA61	Uncharacterized protein OS=Caulobacter crescentus (strain NA1000 / CB15N) GN=CCNA_02330 PE=4 SV=1 - [A0A0H3CA61_CAUCN]	CCNA_02330	0.870059	0.896361	1.05311	0.982962	1.06331	1.05308	1.08864	1.02734	1.06592	1.02065	1.12977	1.04436	1.05968	0.826178	0.933414	0.885114
A0A0H3CA62	Colicin V production protein CvpA OS=Caulobacter crescentus (strain NA1000 / CB15N) GN=CCNA_01731 PE=4 SV=1 - [A0A0H3CA62_CAUCN]	CCNA_01731	1.03784	0.863278	0.851118	1.0126	1.01205	1.05884	1.02049	1.01353	1.10797	1.09037	0.975687	1.01614	1.00687	1.21938	0.956331	1.27506
A0A0H3CA63	Glutaredoxin OS=Caulobacter crescentus (strain NA1000 / CB15N) GN=CCNA_02591 PE=3 SV=1 - [A0A0H3CA63_CAUCN]	CCNA_02591	0.855868	0.827139	0.88755	1.0669	1.07065	1.06454	0.98009	0.873475	1.24143	1.13089	1.24657	1.09775	1.12206	0.964304	1.00222	0.962171
A0A0H3CA66	Endoribonuclease L-PSP OS=Caulobacter crescentus (strain NA1000 / CB15N) GN=CCNA_02241 PE=4 SV=1 - [A0A0H3CA66_CAUCN]	CCNA_02241	0.977873	0.989476	0.98301	0.991377	1.04255	1.05923	1.00374	1.00083	1.00848	1.02243	1.01381	0.986356	1.00291	0.994774	0.935939	1.06286
A0A0H3CA67	Inositol monophosphatase family protein OS=Caulobacter crescentus (strain NA1000 / CB15N) GN=CCNA_02335 PE=4 SV=1 - [A0A0H3CA67_CAUCN]	CCNA_02335	0.972758	1.01687	0.994241	0.945089	1.03308	0.979336	1.13119	1.01166	1.00144	1.00586	0.971556	0.995605	1.11815	0.978392	0.96503	1.01385
A0A0H3CA70	Division plane positioning ATPase MipZ OS=Caulobacter crescentus (strain NA1000 / CB15N) GN=mipZ PE=1 SV=1 - [A0A0H3CA70_CAUCN]	mipZ	1.02636	0.98033	1.01989	1.04913	1.0335	0.967697	1.03641	0.962003	1.04796	0.952424	1.02219	1.10031	1.07735	1.00634	1.08415	0.928226
A0A0H3CA71	Glyoxalase/bleomycin resistance protein, dioxygenase superfamily OS=Caulobacter crescentus (strain NA1000 / CB15N) GN=CCNA_02873 PE=4 SV=1 - [A0A0H3CA71_CAUCN]	CCNA_02873	0.994237	1.05095	0.988967	1.02018	1.18415	1.06603	0.917018	0.91939	0.997615	0.911016	1.02609	1.09506	0.99742	1.00533	0.956989	1.05051
A0A0H3CA74	Methyltransferase OS=Caulobacter crescentus (strain NA1000 / CB15N) GN=CCNA_02340 PE=4 SV=1 - [A0A0H3CA74_CAUCN]	CCNA_02340	1.04234	1.05284	0.984014	1.08245	0.988546	0.952531	0.932944	0.895123	1.05435	0.996483	1.03847	1.05808	1.04225	1.05928	1.13639	0.932145
A0A0H3CA75	Methylglutaconyl-CoA hydratase OS=Caulobacter crescentus (strain NA1000 / CB15N) GN=CCNA_02251 PE=4 SV=1 - [A0A0H3CA75_CAUCN]	CCNA_02251	0.997566	1.09932	1.06102	1.0274	1.02988	1.06935	0.944643	0.966353	0.953223	0.938149	1.02991	1.01607	0.977533	0.940199	0.960769	0.97859
A0A0H3CA77	3-oxoacyl-[acyl-carrier-protein] synthase 2 OS=Caulobacter crescentus (strain NA1000 / CB15N) GN=CCNA_01750 PE=3 SV=1 - [A0A0H3CA77_CAUCN]	CCNA_01750	1.05445	0.968553	1.05607	0.950927	0.93347	0.908815	1.04279	1.01774	0.979409	1.06484	0.901822	0.919773	1.02461	0.998464	1.04634	0.954247
A0A0H3CA78	Uncharacterized protein OS=Caulobacter crescentus (strain NA1000 / CB15N) GN=CCNA_02608 PE=4 SV=1 - [A0A0H3CA78_CAUCN]	CCNA_02608	0.930998	0.99549	1.04207	1.14051	1.09568	1.06745	0.99355	0.991597	0.918052	0.915058	1.22504	1.00327	1.00197	0.893413	1.06844	0.836181
A0A0H3CA79	Arabinose-5-phosphate isomerase OS=Caulobacter crescentus (strain NA1000 / CB15N) GN=CCNA_02346 PE=3 SV=1 - [A0A0H3CA79_CAUCN]	CCNA_02346	0.983499	0.992898	0.993564	0.954796	0.940466	0.955954	1.02707	1.13197	0.999141	1.09122	0.970815	0.915618	0.907329	0.98987	0.998788	0.991071
A0A0H3CA80	Magnesium transporter MgtE OS=Caulobacter crescentus (strain NA1000 / CB15N) GN=CCNA_02256 PE=3 SV=1 - [A0A0H3CA80_CAUCN]	CCNA_02256	0.990562	1.03467	1.00416	1.0316	1.08239	0.973649	0.930406	0.989748	0.974928	1.02442	1.04143	0.951688	0.940043	0.986456	1.05952	0.93104
A0A0H3CA82	Rieske (2Fe-2S) domain protein OS=Caulobacter crescentus (strain NA1000 / CB15N) GN=CCNA_02613 PE=4 SV=1 - [A0A0H3CA82_CAUCN]	CCNA_02613	1.10288	0.98531	1.03737	0.911538	1.10352	1.0714	0.931281	0.995749	1.08321	0.838182	0.826504	1.29233	0.935256	1.06315	0.850789	1.24961
A0A0H3CA84	Membrane-bound aldehyde dehydrogenase, large subunit OS=Caulobacter crescentus (strain NA1000 / CB15N) GN=CCNA_02352 PE=4 SV=1 - [A0A0H3CA84_CAUCN]	CCNA_02352	0.985978	0.97927	0.96614	0.979931	0.955485	0.972643	0.99403	0.97358	1.09396	1.05448	0.993867	1.03744	1.02101	1.02053	1.00749	1.01294
A0A0H3CA85	Propionyl-CoA carboxylase biotin-containing subunit OS=Caulobacter crescentus (strain NA1000 / CB15N) GN=CCNA_02261 PE=4 SV=1 - [A0A0H3CA85_CAUCN]	CCNA_02261	1.17292	1.15497	1.13592	0.961082	0.889212	0.94552	0.89099	0.980939	0.915755	0.940396	0.819395	0.973797	0.908303	1.03257	1.01646	1.01585
A0A0H3CA87	Stomatin/prohibitin-related protein OS=Caulobacter crescentus (strain NA1000 / CB15N) GN=CCNA_02619 PE=4 SV=1 - [A0A0H3CA87_CAUCN]	CCNA_02619	0.978919	0.982714	0.963802	1.29125	1.20052	1.28136	0.883787	0.877752	0.793432	0.822043	1.31906	0.965195	1.00687	1.01569	1.00772	1.0079
A0A0H3CA88	LPS-assembly protein LptD OS=Caulobacter crescentus (strain NA1000 / CB15N) GN=lptD PE=3 SV=1 - [A0A0H3CA88_CAUCN]	lptD	1.04077	1.03686	1.02983	0.976286	0.979843	0.979597	1.01354	1.01022	0.980252	0.952125	0.938046	1.02954	1.00329	1.01062	0.996621	1.01404
A0A0H3CA89	Methylmalonic acid semialdehyde dehydrogenase OS=Caulobacter crescentus (strain NA1000 / CB15N) GN=CCNA_02357 PE=4 SV=1 - [A0A0H3CA89_CAUCN]	CCNA_02357	1.11962	1.11248	1.1262	0.965483	0.925661	0.906314	0.925097	1.00998	0.9784	0.905168	0.862327	1.0809	0.91596	0.994165	1.06528	0.933239
A0A0H3CA92	Peptidase inhibitor, I78 family OS=Caulobacter crescentus (strain NA1000 / CB15N) GN=CCNA_01765 PE=4 SV=1 - [A0A0H3CA92_CAUCN]	CCNA_01765	0.960125	0.999852	1.00226	0.9298	1.04893	0.991394	0.949161	0.975141	1.1048	1.08148	0.968416	1.02156	0.973358	0.957959	0.937872	1.02142
A0A0H3CA93	D-alanine--D-alanine ligase OS=Caulobacter crescentus (strain NA1000 / CB15N) GN=ddl PE=3 SV=1 - [A0A0H3CA93_CAUCN]	ddl	0.99001	0.933452	0.949772	1.07803	1.06044	1.06315	0.921872	0.886102	1.09966	1.09951	1.08891	1.00014	1.04037	1.04237	1.014	1.02798
A0A0H3CA94	GAF domain-containing protein OS=Caulobacter crescentus (strain NA1000 / CB15N) GN=CCNA_02362 PE=4 SV=1 - [A0A0H3CA94_CAUCN]	CCNA_02362	0.895606	0.897203	0.917685	1.09904	1.07305	1.08459	0.934176	0.950733	1.14209	1.04382	1.22715	1.09414	0.982585	0.97594	1.01332	0.96311
A0A0H3CA95	Uncharacterized protein OS=Caulobacter crescentus (strain NA1000 / CB15N) GN=CCNA_02272 PE=4 SV=1 - [A0A0H3CA95_CAUCN]	CCNA_02272	0.965415	0.973099	0.945843	1.02599	1.08599	1.08488	0.951946	0.914148	1.04303	1.04883	1.06275	0.994476	1.04135	1.02069	0.945723	1.07927
A0A0H3CA99	CelR-family transcriptional regulator OS=Caulobacter crescentus (strain NA1000 / CB15N) GN=CCNA_02367 PE=4 SV=1 - [A0A0H3CA99_CAUCN]	CCNA_02367											#DIV/0!	#DIV/0!	#DIV/0!	#DIV/0!	#DIV/0!	#DIV/0!
A0A0H3CAA0	Conserved hypothetical membrane protein OS=Caulobacter crescentus (strain NA1000 / CB15N) GN=CCNA_02278 PE=4 SV=1 - [A0A0H3CAA0_CAUCN]	CCNA_02278	0.824697	0.911122	0.927953	1.13961	0.990839	1.17867	1.32345	1.2629	0.833763	0.904088	1.38186	0.922214	1.04794	0.888727	0.966863	0.919186
A0A0H3CAA1	HAD superfamily hydrolase OS=Caulobacter crescentus (strain NA1000 / CB15N) GN=CCNA_02908 PE=4 SV=1 - [A0A0H3CAA1_CAUCN]	CCNA_02908	1.00644	1.00511	1.00029	1.02763	0.979376	1.02532	0.987309	0.992225	1.00324	1.0304	1.02106	0.973634	0.995046	1.00615	1.00226	1.00388
A0A0H3CAA2	Ribonuclease D OS=Caulobacter crescentus (strain NA1000 / CB15N) GN=rnd PE=3 SV=1 - [A0A0H3CAA2_CAUCN]	rnd	1.00112	0.972824	1.02108	0.941453	0.958958	0.952927	1.05731	1.09027	1.02489	1.10761	0.940398	0.925314	0.969768	0.980453	0.98796	0.992401
A0A0H3CAA4	UDP-N-acetylmuramoyl-L-alanyl-D-glutamate--2,6-diaminopimelate ligase OS=Caulobacter crescentus (strain NA1000 / CB15N) GN=murE PE=3 SV=1 - [A0A0H3CAA4_CAUCN]	murE	0.892624	0.950781	0.978037	1.12961	1.13489	1.17581	0.892989	0.955605	0.944458	0.983424	1.26549	0.960378	0.934475	0.912669	0.960709	0.949996
A0A0H3CAA6	Zinc metalloprotease OS=Caulobacter crescentus (strain NA1000 / CB15N) GN=CCNA_02914 PE=4 SV=1 - [A0A0H3CAA6_CAUCN]	CCNA_02914	1.05163	1.05175	0.986071	1.05455	1.02904	1.08215	0.927505	0.938736	1.03395	0.876784	1.00277	1.17925	0.988036	1.06649	0.974496	1.0944
A0A0H3CAA9	N-acetyl-anhydromuramyl-L-alanine amidase OS=Caulobacter crescentus (strain NA1000 / CB15N) GN=CCNA_02650 PE=4 SV=1 - [A0A0H3CAA9_CAUCN]	CCNA_02650	0.933162	1.03606	0.953784	1.0341	1.05473	1.04333	1.02064	1.00738	0.979624	0.91704	1.10817	1.06825	1.01316	0.978379	0.991161	0.987104
A0A0H3CAB2	Thiol:disulfide interchange protein tlpA OS=Caulobacter crescentus (strain NA1000 / CB15N) GN=CCNA_02293 PE=4 SV=1 - [A0A0H3CAB2_CAUCN]	CCNA_02293	1.00492	0.976955	0.957272	1.12312	1.03069	1.07743	0.942189	0.900391	1.05056	0.960967	1.11762	1.09323	1.04642	1.04978	1.04241	1.00706
A0A0H3CAB3	EcsC family protein OS=Caulobacter crescentus (strain NA1000 / CB15N) GN=CCNA_01786 PE=4 SV=1 - [A0A0H3CAB3_CAUCN]	CCNA_01786	0.979744	0.90369	0.900427	1.06988	1.00684	1.06769	1.08814	1.04141	1.13578	0.995615	1.092	1.14078	1.04488	1.08809	1.00205	1.08586
A0A0H3CAB5	Alpha/beta hydrolase family protein OS=Caulobacter crescentus (strain NA1000 / CB15N) GN=CCNA_02383 PE=4 SV=1 - [A0A0H3CAB5_CAUCN]	CCNA_02383	1.09184	1.06631	1.13701	1.03288	1.04484	0.932378	0.945234	0.869211	0.972665	0.893067	0.946003	1.08913	1.08746	0.960275	1.1078	0.866834
A0A0H3CAB7	MJ0042 family finger-like domain protein OS=Caulobacter crescentus (strain NA1000 / CB15N) GN=CCNA_02298 PE=4 SV=1 - [A0A0H3CAB7_CAUCN]	CCNA_02298	0.973315	0.983629	0.977626	0.983541	1.07969	0.982028	0.966862	0.992764	1.07673	1.03003	1.01051	1.04534	0.973909	0.995591	1.00154	0.994059
A0A0H3CAB9	Pyridoxamine 5'-phosphate oxidase family protein OS=Caulobacter crescentus (strain NA1000 / CB15N) GN=CCNA_02660 PE=4 SV=1 - [A0A0H3CAB9_CAUCN]	CCNA_02660	0.982533	0.986206	0.97328	1.05805	1.08224	1.06251	0.964636	0.988608	0.997483	0.975547	1.07685	1.02249	0.975752	1.00951	0.995795	1.01377
A0A0H3CAC0	Phosphoglycolate phosphatase OS=Caulobacter crescentus (strain NA1000 / CB15N) GN=gph PE=3 SV=1 - [A0A0H3CAC0_CAUCN]	gph	0.9836	1.06448	0.99018	1.01098	0.882389	0.909437	1.08458	1.07996	0.973509	1.06116	1.02784	0.917403	1.00428	0.993354	1.11166	0.89358
A0A0H3CAC2	Gamma-glutamylcyclotransferase OS=Caulobacter crescentus (strain NA1000 / CB15N) GN=CCNA_02303 PE=3 SV=1 - [A0A0H3CAC2_CAUCN]	CCNA_02303	0.999072	0.916449	1.00929	1.03673	1.0054	1.07791	1.00679	0.963625	1.05886	0.969598	1.03769	1.09206	1.0448	0.989873	0.961796	1.02919
A0A0H3CAC3	Uncharacterized protein OS=Caulobacter crescentus (strain NA1000 / CB15N) GN=CCNA_01801 PE=4 SV=1 - [A0A0H3CAC3_CAUCN]	CCNA_01801	1.00352	1.11001	1.01997	1.04939	1.10695	1.08261	1.01854	0.930943	1.00471	0.963294	1.04571	1.043	1.0941	0.983877	0.969314	1.01502
A0A0H3CAC6	Glutathione S-transferase OS=Caulobacter crescentus (strain NA1000 / CB15N) GN=CCNA_02936 PE=3 SV=1 - [A0A0H3CAC6_CAUCN]	CCNA_02936	0.948316	1.06654	1.02967	0.875773	1.04796	0.927337	1.00037	0.984966	1.10242	1.07382	0.923504	1.02664	1.01564	0.92099	0.944396	0.975216
A0A0H3CAC8	Ferritin-like domain protein OS=Caulobacter crescentus (strain NA1000 / CB15N) GN=CCNA_01806 PE=4 SV=1 - [A0A0H3CAC8_CAUCN]	CCNA_01806	1.03812	1.13053	0.930258	0.988277	0.983236	1.01806	0.951571	1.05558	0.9342	0.98529	0.95199	0.948147	0.901467	1.11595	0.970747	1.14957
A0A0H3CAD0	SalR-family ligand-binding transcriptional regulator OS=Caulobacter crescentus (strain NA1000 / CB15N) GN=CCNA_02401 PE=4 SV=1 - [A0A0H3CAD0_CAUCN]	CCNA_02401	1.00053	1.08395	0.987686	1.00775	1.08497	1.07221	0.944749	0.999433	0.927993	0.934976	1.00722	0.992531	0.945284	1.013	0.939886	1.0778
A0A0H3CAD1	Nucleoside-diphosphate-sugar epimerase OS=Caulobacter crescentus (strain NA1000 / CB15N) GN=CCNA_02942 PE=4 SV=1 - [A0A0H3CAD1_CAUCN]	CCNA_02942	0.978847	1.00445	0.964795	0.943569	0.971741	0.976599	1.00665	1.08704	1.10906	1.11	0.96396	0.999147	0.926047	1.01456	0.966179	1.05008
A0A0H3CAD2	Alpha/beta hydrolase family protein OS=Caulobacter crescentus (strain NA1000 / CB15N) GN=CCNA_02313 PE=4 SV=1 - [A0A0H3CAD2_CAUCN]	CCNA_02313	1.13234	1.03516	0.989392	0.980508	0.9245	0.980999	1.03964	1.06301	0.939299	0.98726	0.86591	0.951419	0.978021	1.14448	0.999499	1.14506
A0A0H3CAD3	tRNA-dihydrouridine synthase OS=Caulobacter crescentus (strain NA1000 / CB15N) GN=CCNA_01813 PE=3 SV=1 - [A0A0H3CAD3_CAUCN]	CCNA_01813	1.02876	1.00394	0.98815	1.05673	1.02429	0.995093	1.04947	1.07809	0.924221	0.957645	1.02718	0.965097	0.973454	1.0411	1.06194	0.980375
A0A0H3CAD4	Membrane lipoprotein OS=Caulobacter crescentus (strain NA1000 / CB15N) GN=CCNA_02406 PE=4 SV=1 - [A0A0H3CAD4_CAUCN]	CCNA_02406	1.06365	1.0899	1.01237	0.967511	0.951418	0.989679	1.00174	0.920539	0.997972	1.01365	0.909618	0.98453	1.08821	1.05065	0.977601	1.07473
A0A0H3CAD5	Uncharacterized protein OS=Caulobacter crescentus (strain NA1000 / CB15N) GN=CCNA_02676 PE=4 SV=1 - [A0A0H3CAD5_CAUCN]	CCNA_02676	1.08944	0.923409	0.929134	1.13373	1.13659	1.12032	0.945511	1.07913	0.914673	0.83987	1.04065	1.08906	0.876179	1.17253	1.01197	1.15866
A0A0H3CAD9	D-alanine aminotransferase OS=Caulobacter crescentus (strain NA1000 / CB15N) GN=CCNA_01818 PE=3 SV=1 - [A0A0H3CAD9_CAUCN]	CCNA_01818	0.955496	1.00066	1.05014	1.0537	1.02334	1.03277	1.00957	1.04164	1.0193	0.930594	1.10278	1.09532	0.969211	0.909872	1.02027	0.891797
A0A0H3CAE1	Methylenetetrahydrofolate--tRNA-(uracil-5-)-methyltransferase TrmFO OS=Caulobacter crescentus (strain NA1000 / CB15N) GN=trmFO PE=3 SV=1 - [A0A0H3CAE1_CAUCN]	trmFO	0.958864	0.921498	0.946372	0.914367	0.944764	0.945593	1.0053	1.07446	1.08358	1.12445	0.953594	0.963655	0.935637	1.0132	0.966977	1.0478
A0A0H3CAE2	Ornithine carbamoyltransferase, catabolic OS=Caulobacter crescentus (strain NA1000 / CB15N) GN=arcB PE=3 SV=1 - [A0A0H3CAE2_CAUCN]	arcB	1.06007	1.0747	0.992322	0.93097	0.975776	0.922954	1.0535	1.0202	0.999064	0.985067	0.878216	1.01421	1.03264	1.06827	1.00869	1.05907
A0A0H3CAE3	DNA-binding protein HU OS=Caulobacter crescentus (strain NA1000 / CB15N) GN=CCNA_02416 PE=3 SV=1 - [A0A0H3CAE3_CAUCN]	CCNA_02416	0.95458	0.954357	0.967294	1.24261	1.21336	1.21896	0.856688	0.761521	1.00186	0.742032	1.30174	1.35016	1.12497	0.986856	1.0194	0.968075
A0A0H3CAE5	Peptidoglycan-specific endopeptidase, M23 family OS=Caulobacter crescentus (strain NA1000 / CB15N) GN=CCNA_02331 PE=4 SV=1 - [A0A0H3CAE5_CAUCN]	CCNA_02331	0.989195	1.01112	0.980824	1.05688	1.04686	0.983424	1.1008	1.06558	0.936225	1.02361	1.06843	0.914628	1.03305	1.00853	1.0747	0.938436
A0A0H3CAE7	TonB-dependent receptor OS=Caulobacter crescentus (strain NA1000 / CB15N) GN=CCNA_01830 PE=4 SV=1 - [A0A0H3CAE7_CAUCN]	CCNA_01830	1.18484	1.17075	1.16319	0.876256	0.858867	0.853017	0.999919	1.43031	0.818169	0.788805	0.739557	1.03723	0.699092	1.01861	1.02724	0.991596
A0A0H3CAE8	Lysophospholipase L2 OS=Caulobacter crescentus (strain NA1000 / CB15N) GN=CCNA_02336 PE=4 SV=1 - [A0A0H3CAE8_CAUCN]	CCNA_02336	1.02889	1.03742	0.992844	0.855452	1.13664	0.993356	0.830945	0.718157	1.18516	1.05091	0.831431	1.12774	1.15705	1.03631	0.861173	1.20337
A0A0H3CAE9	TonB accessory protein exbB OS=Caulobacter crescentus (strain NA1000 / CB15N) GN=exbB PE=3 SV=1 - [A0A0H3CAE9_CAUCN]	exbB	1.07963	1.01648	1.09209	0.992017	0.999466	0.987402	1.02823	1.01559	0.916968	0.927429	0.918848	0.988721	1.01244	0.988594	1.00467	0.983995
A0A0H3CAF0	Thioredoxin reductase OS=Caulobacter crescentus (strain NA1000 / CB15N) GN=CCNA_02964 PE=3 SV=1 - [A0A0H3CAF0_CAUCN]	CCNA_02964	0.930053	0.916926	0.988148	1.0432	1.0876	1.04294	0.98847	0.966175	1.11048	1.05086	1.12166	1.05673	1.02308	0.941208	1.00025	0.94097
A0A0H3CAF1	Small heat shock protein OS=Caulobacter crescentus (strain NA1000 / CB15N) GN=CCNA_02341 PE=3 SV=1 - [A0A0H3CAF1_CAUCN]	CCNA_02341	0.662219	0.583802	0.619797	1.39851	1.06218	0.995701	1.11358	1.03047	1.42791	1.10806	2.11186	1.28865	1.08066	1.06844	1.40455	0.760703
A0A0H3CAF2	ABC transporter ATP-binding protein OS=Caulobacter crescentus (strain NA1000 / CB15N) GN=CCNA_01835 PE=4 SV=1 - [A0A0H3CAF2_CAUCN]	CCNA_01835	0.869345	0.903818	0.858737	1.1013	1.12991	1.16991	0.884582	0.866638	1.09642	1.0118	1.26681	1.08364	1.0207	1.01235	0.94135	1.07543
A0A0H3CAF3	Maf-like protein CCNA_02427 OS=Caulobacter crescentus (strain NA1000 / CB15N) GN=CCNA_02427 PE=3 SV=1 - [A0A0H3CAF3_CAUCN]	CCNA_02427	0.959322	0.987218	0.965946	1.02435	1.00686	1.00167	1.08564	1.09893	1.02936	0.985955	1.06779	1.04403	0.987908	0.993143	1.02264	0.971151
A0A0H3CAF5	Phosphomannomutase/phosphoglucomutase OS=Caulobacter crescentus (strain NA1000 / CB15N) GN=CCNA_02347 PE=4 SV=1 - [A0A0H3CAF5_CAUCN]	CCNA_02347	1.05428	1.0266	1.04503	0.945058	0.939712	0.932122	1.06132	1.02484	0.978285	1.03764	0.896397	0.9428	1.0356	1.00886	1.01388	0.995048
A0A0H3CAF6	UvrABC system protein C OS=Caulobacter crescentus (strain NA1000 / CB15N) GN=uvrC PE=3 SV=1 - [A0A0H3CAF6_CAUCN]	uvrC	0.990219	0.962991	0.889601	1.12168	1.03053	1.09087	1.02541	1.02982	1.00958	0.952994	1.13276	1.05937	0.995713	1.11311	1.02825	1.08252
A0A0H3CAF9	Membrane-bound aldehyde dehydrogenase iron-sulfur protein OS=Caulobacter crescentus (strain NA1000 / CB15N) GN=CCNA_02353 PE=4 SV=1 - [A0A0H3CAF9_CAUCN]	CCNA_02353	1.05309	0.980713	0.983581	0.973872	0.955198	0.951418	0.948315	0.812144	1.15795	0.99747	0.924776	1.16089	1.16767	1.07067	1.0236	1.04598
A0A0H3CAG0	Tryptophan 2,3-dioxygenase OS=Caulobacter crescentus (strain NA1000 / CB15N) GN=kynA PE=3 SV=1 - [A0A0H3CAG0_CAUCN]	kynA	1.11763	1.26701	1.20222	1.06423	1.0574	1.04918	0.80567	0.854238	0.804074	0.762112	0.952219	1.05506	0.943144	0.929643	1.01435	0.916494
A0A0H3CAG2	SURF1-like protein OS=Caulobacter crescentus (strain NA1000 / CB15N) GN=CCNA_01847 PE=3 SV=1 - [A0A0H3CAG2_CAUCN]	CCNA_01847	0.918478	1.00469	0.917363	0.926288	1.04379	1.00478	1.02663	1.0188	1.01467	1.18895	1.0085	0.853414	1.00768	1.00122	0.921883	1.08605
A0A0H3CAG3	FMN reductase OS=Caulobacter crescentus (strain NA1000 / CB15N) GN=CCNA_02358 PE=4 SV=1 - [A0A0H3CAG3_CAUCN]	CCNA_02358	1.00523	1.00138	0.971838	0.964637	1.00354	0.967647	1.08511	1.04467	1.03903	1.05676	0.959622	0.983224	1.03871	1.03435	0.996889	1.03758
A0A0H3CAG4	Methyltransferase OS=Caulobacter crescentus (strain NA1000 / CB15N) GN=CCNA_02985 PE=4 SV=1 - [A0A0H3CAG4_CAUCN]	CCNA_02985	0.913501	1.24603	1.15526	0.825676	1.01507	0.896896	1.16638	1.07569	0.873896	0.989042	0.903859	0.883578	1.08431	0.790734	0.920592	0.858941
A0A0H3CAG6	N(4)-(Beta-N-acetylglucosaminyl)-L-asparaginase OS=Caulobacter crescentus (strain NA1000 / CB15N) GN=CCNA_02444 PE=4 SV=1 - [A0A0H3CAG6_CAUCN]	CCNA_02444	1.11874	0.973343	1.06461	0.960647	0.967169	1.01259	0.952093	1.11682	0.974848	0.940815	0.858688	1.03617	0.852506	1.05084	0.9487	1.10766
A0A0H3CAG7	Uncharacterized protein OS=Caulobacter crescentus (strain NA1000 / CB15N) GN=CCNA_02363 PE=4 SV=1 - [A0A0H3CAG7_CAUCN]	CCNA_02363	0.932816	0.914874	0.906206	1.15925	1.06728	1.06663	1.02981	1.02728	0.979027	0.995915	1.24274	0.983043	1.00246	1.02937	1.08683	0.947124
A0A0H3CAG9	N-carbamoyl-L-amino acid hydrolase OS=Caulobacter crescentus (strain NA1000 / CB15N) GN=CCNA_02686 PE=4 SV=1 - [A0A0H3CAG9_CAUCN]	CCNA_02686	1.03878	0.975639	1.04103	0.96607	0.988823	0.941325	1.02888	1.07535	0.981051	1.04011	0.930004	0.94322	0.956786	0.997836	1.02629	0.972277
A0A0H3CAH0	AraC-family transcriptional regulator OS=Caulobacter crescentus (strain NA1000 / CB15N) GN=CCNA_01857 PE=4 SV=1 - [A0A0H3CAH0_CAUCN]	CCNA_01857	1.04022	1.26272	1.02878	0.829586	0.839796	0.746123	0.9479	1.08477	1.01634	1.31681	0.797506	0.771816	0.873823	1.01113	1.11186	0.909398
A0A0H3CAH2	Conserved hypothetical membrane protein OS=Caulobacter crescentus (strain NA1000 / CB15N) GN=CCNA_02450 PE=4 SV=1 - [A0A0H3CAH2_CAUCN]	CCNA_02450	1.13491	0.968313	0.949022	1.15716	1.09182	1.10493	1.031	0.888749	0.837184	0.884723	1.01961	0.946267	1.16006	1.19587	1.04727	1.14189
A0A0H3CAH3	Patatin family phospholipase domain protein OS=Caulobacter crescentus (strain NA1000 / CB15N) GN=CCNA_02996 PE=4 SV=1 - [A0A0H3CAH3_CAUCN]	CCNA_02996											#DIV/0!	#DIV/0!	#DIV/0!	#DIV/0!	#DIV/0!	#DIV/0!
A0A0H3CAH4	TetR-family transcriptional regulator OS=Caulobacter crescentus (strain NA1000 / CB15N) GN=CCNA_02691 PE=4 SV=1 - [A0A0H3CAH4_CAUCN]	CCNA_02691	1.07917	1.01685	1.06115	0.99807	1.01467	1.13925	0.93485	0.792229	0.907515	0.964971	0.924853	0.940458	1.18003	1.01697	0.876074	1.16083
A0A0H3CAH8	CDP-diacylglycerol--glycerol-3-phosphate 3-phosphatidyltransferase OS=Caulobacter crescentus (strain NA1000 / CB15N) GN=CCNA_03002 PE=3 SV=1 - [A0A0H3CAH8_CAUCN]	CCNA_03002	0.978405	0.950784	1.03002	1.0802	0.967634	1.03128	1.01462	1.00948	1.01193	0.988555	1.10405	1.02365	1.00509	0.949887	1.04744	0.906866
A0A0H3CAH9	AtzE family amidohydrolase OS=Caulobacter crescentus (strain NA1000 / CB15N) GN=CCNA_02696 PE=4 SV=1 - [A0A0H3CAH9_CAUCN]	CCNA_02696	0.96579	0.98908	1.00155	1.00407	0.981868	0.999346	0.949102	1.05623	1.00127	1.01367	1.03964	0.987763	0.898578	0.964291	1.00473	0.959755
A0A0H3CAI1	SIMPL family protein OS=Caulobacter crescentus (strain NA1000 / CB15N) GN=CCNA_02378 PE=4 SV=1 - [A0A0H3CAI1_CAUCN]	CCNA_02378	0.601664	0.623141	0.605226	1.54755	1.51028	1.55669	1.12836	0.953766	0.914549	0.76928	2.57213	1.18884	1.18306	0.994114	0.994131	0.999983
A0A0H3CAI2	Uncharacterized protein OS=Caulobacter crescentus (strain NA1000 / CB15N) GN=CCNA_02460 PE=4 SV=1 - [A0A0H3CAI2_CAUCN]	CCNA_02460	1.03596	1.03355	0.90737	1.07596	1.13738	0.857967	0.96215	1.06766	1.00489	0.989006	1.03861	1.01606	0.90118	1.14172	1.25408	0.910401
A0A0H3CAI3	Putative PD-(D/E)xK nuclease protein OS=Caulobacter crescentus (strain NA1000 / CB15N) GN=CCNA_03008 PE=4 SV=1 - [A0A0H3CAI3_CAUCN]	CCNA_03008	1.06879	1.08328	0.968733	1.03176	1.0684	1.01432	0.917328	0.88505	1.00618	0.982915	0.965355	1.02367	1.03647	1.10329	1.0172	1.08463
A0A0H3CAI4	Xanthine dehydrogenase large subunit OS=Caulobacter crescentus (strain NA1000 / CB15N) GN=CCNA_02701 PE=4 SV=1 - [A0A0H3CAI4_CAUCN]	CCNA_02701	1.06467	1.06514	1.06752	0.970283	0.939942	0.927082	1.00335	0.995283	0.99296	0.990428	0.911347	1.00256	1.0081	0.997329	1.0466	0.952924
A0A0H3CAI6	Very-long-chain acyl-CoA synthetase OS=Caulobacter crescentus (strain NA1000 / CB15N) GN=CCNA_02384 PE=4 SV=1 - [A0A0H3CAI6_CAUCN]	CCNA_02384	1.02754	1.00904	1.03012	1.1045	1.04183	1.05477	0.90546	0.981729	0.95927	0.916829	1.0749	1.04629	0.922311	0.997499	1.04715	0.952586
A0A0H3CAI7	UDP-glucose 4-epimerase OS=Caulobacter crescentus (strain NA1000 / CB15N) GN=CCNA_02466 PE=4 SV=1 - [A0A0H3CAI7_CAUCN]	CCNA_02466	0.915954	1.0079	0.979155	1.04374	0.927128	0.984375	1.04415	1.01714	1.06326	1.12799	1.13951	0.942618	1.02656	0.935454	1.06031	0.882248
A0A0H3CAI8	Alkyl hydroperoxide reductase subunit F OS=Caulobacter crescentus (strain NA1000 / CB15N) GN=CCNA_03013 PE=3 SV=1 - [A0A0H3CAI8_CAUCN]	CCNA_03013	0.998038	0.958664	0.96028	0.982226	0.979131	0.909336	1.05758	1.03172	0.939233	1.09268	0.984157	0.859569	1.02506	1.03932	1.08016	0.962192
A0A0H3CAI9	Rrf2 family protein OS=Caulobacter crescentus (strain NA1000 / CB15N) GN=CCNA_02708 PE=4 SV=1 - [A0A0H3CAI9_CAUCN]	CCNA_02708	1.02383	1.02727	1.12887	0.862981	0.884791	0.844486	1.07345	1.03463	1.00712	1.1518	0.842892	0.874385	1.03752	0.906952	1.0219	0.887514
A0A0H3CAJ6	TonB-dependent receptor OS=Caulobacter crescentus (strain NA1000 / CB15N) GN=CCNA_03023 PE=3 SV=1 - [A0A0H3CAJ6_CAUCN]	CCNA_03023	1.04948	1.08081	1.0488	0.91196	0.921128	0.903977	0.961779	0.910841	0.973161	1.1576	0.868967	0.840669	1.05592	1.00064	1.00883	0.991885
A0A0H3CAJ9	Methyl-accepting chemotaxis protein OS=Caulobacter crescentus (strain NA1000 / CB15N) GN=CCNA_02402 PE=4 SV=1 - [A0A0H3CAJ9_CAUCN]	CCNA_02402	1.01798	0.90239	0.949861	1.075	0.981166	1.04097	1.01086	1.07674	1.04319	0.959491	1.05601	1.08723	0.938818	1.07171	1.03269	1.03779
A0A0H3CAK0	Prephenate dehydratase OS=Caulobacter crescentus (strain NA1000 / CB15N) GN=CCNA_03028 PE=4 SV=1 - [A0A0H3CAK0_CAUCN]	CCNA_03028	1.07664	1.08929	1.05591	0.92656	0.895174	0.904025	1.00166	0.996641	0.953912	1.0517	0.860602	0.907017	1.00504	1.01963	1.02493	0.994835
A0A0H3CAK3	Hydrolase, nudix family OS=Caulobacter crescentus (strain NA1000 / CB15N) GN=CCNA_02407 PE=4 SV=1 - [A0A0H3CAK3_CAUCN]	CCNA_02407	1.00004	1.23467	1.07681	1.10026	1.11594	1.05767	0.905644	0.782446	0.909422	0.803261	1.10022	1.13216	1.15745	0.928705	1.04027	0.892753
A0A0H3CAK6	Cobalt-zinc-cadmium resistance protein czcC OS=Caulobacter crescentus (strain NA1000 / CB15N) GN=CCNA_02471 PE=4 SV=1 - [A0A0H3CAK6_CAUCN]	CCNA_02471	1.05316	1.04018	1.00321	0.877555	0.928354	0.932464	1.00529	1.07575	1.12032	1.06921	0.83326	1.0478	0.934501	1.04979	0.941114	1.11548
A0A0H3CAK7	Glutaminyl-peptide cyclotransferase OS=Caulobacter crescentus (strain NA1000 / CB15N) GN=CCNA_02733 PE=4 SV=1 - [A0A0H3CAK7_CAUCN]	CCNA_02733	0.998515	0.961262	1.04021	0.939643	0.985164	0.992457	0.931925	1.01114	1.0678	1.09789	0.94104	0.972594	0.921654	0.959921	0.946785	1.01387
A0A0H3CAK9	Pilus assembly ATPase CpaE OS=Caulobacter crescentus (strain NA1000 / CB15N) GN=cpaE PE=4 SV=1 - [A0A0H3CAK9_CAUCN]	cpaE	0.993415	0.948942	1.01061	0.935501	0.959796	0.9625	1.04827	0.978674	1.07461	1.11953	0.941702	0.959874	1.07111	0.982987	0.971949	1.01136
A0A0H3CAL1	Vanillate demethylase oxygenase subunit A vanA OS=Caulobacter crescentus (strain NA1000 / CB15N) GN=vanA PE=4 SV=1 - [A0A0H3CAL1_CAUCN]	vanA	0.632695	0.534729	0.586783	0.54285	0.564186	0.520726	0.638901	0.775848	0.991524	3.6736	0.857997	0.269906	0.823487	1.07824	1.04249	1.0343
A0A0H3CAL5	GntR-family transcriptional regulator OS=Caulobacter crescentus (strain NA1000 / CB15N) GN=CCNA_02744 PE=4 SV=1 - [A0A0H3CAL5_CAUCN]	CCNA_02744	0.970256	0.977058	0.968296	1.08768	0.89049	1.18906	1.15055	0.966461	1.05726	0.850565	1.12102	1.24301	1.19047	1.00202	0.914739	1.09542
A0A0H3CAL7	Short chain dehydrogenase OS=Caulobacter crescentus (strain NA1000 / CB15N) GN=CCNA_02422 PE=4 SV=1 - [A0A0H3CAL7_CAUCN]	CCNA_02422	0.855368	0.877984	0.905166	1.00099	1.02099	0.96426	1.02741	0.952803	1.22447	1.16938	1.17025	1.0471	1.0783	0.944984	1.03809	0.910307
A0A0H3CAL9	Para-aminobenzoate synthetase component I OS=Caulobacter crescentus (strain NA1000 / CB15N) GN=CCNA_03048 PE=4 SV=1 - [A0A0H3CAL9_CAUCN]	CCNA_03048	1.02588	1.00111	1.03505	1.063	0.864487	1.03186	0.967556	1.0169	0.953865	1.07118	1.03619	0.890481	0.951481	0.991141	1.03018	0.962105
A0A0H3CAM0	Uncharacterized protein OS=Caulobacter crescentus (strain NA1000 / CB15N) GN=CCNA_02749 PE=4 SV=1 - [A0A0H3CAM0_CAUCN]	CCNA_02749	0.96796	0.978185	1.05592	0.957516	0.968148	0.876964	0.987047	1.0272	1.18739	1.03416	0.98921	1.14817	0.960915	0.916702	1.09185	0.839584
A0A0H3CAM1	Translation initiation factor IF-1 OS=Caulobacter crescentus (strain NA1000 / CB15N) GN=infA PE=3 SV=1 - [A0A0H3CAM1_CAUCN]	infA	0.97235	0.981908	0.99918	1.01808	1.02883	1.07839	0.999981	1.07177	1.01298	0.963408	1.04703	1.05145	0.933022	0.973149	0.94407	1.0308
A0A0H3CAM2	Glyoxalase family protein OS=Caulobacter crescentus (strain NA1000 / CB15N) GN=CCNA_01911 PE=4 SV=1 - [A0A0H3CAM2_CAUCN]	CCNA_01911	0.880806	0.797939	0.952301	1.07335	1.19583	1.11147	0.879764	0.881828	1.28895	0.962665	1.2186	1.33894	0.99766	0.924924	0.965701	0.957775
A0A0H3CAM5	L-lysine/L-arginine carboxypeptidase OS=Caulobacter crescentus (strain NA1000 / CB15N) GN=CCNA_02754 PE=4 SV=1 - [A0A0H3CAM5_CAUCN]	CCNA_02754	1.04278	1.04796	1.06177	1.06509	1.05948	1.0798	0.947282	0.950796	0.901687	0.905456	1.02139	0.995837	0.996304	0.982118	0.986376	0.995684
A0A0H3CAM6	Uncharacterized protein OS=Caulobacter crescentus (strain NA1000 / CB15N) GN=CCNA_02434 PE=4 SV=1 - [A0A0H3CAM6_CAUCN]	CCNA_02434	0.966447	0.979861	1.00873	0.95817	0.943869	0.857624	1.06929	1.05799	1.02267	1.12305	0.991436	0.910618	1.01068	0.958087	1.11724	0.85755
A0A0H3CAM7	Ribonuclease BN OS=Caulobacter crescentus (strain NA1000 / CB15N) GN=CCNA_01916 PE=4 SV=1 - [A0A0H3CAM7_CAUCN]	CCNA_01916	0.97163	1.01467	0.99275	1.06816	1.13918	1.15509	1.06826	0.964603	0.910672	0.842228	1.09934	1.08127	1.10746	0.978725	0.924741	1.05838
A0A0H3CAM8	Protocatechuate 3,4-dioxygenase beta chain OS=Caulobacter crescentus (strain NA1000 / CB15N) GN=CCNA_02491 PE=4 SV=1 - [A0A0H3CAM8_CAUCN]	CCNA_02491	0.857914	0.889549	0.857713	0.80952	0.820726	0.837168	0.8576	1.00664	1.01722	1.88807	0.943591	0.538762	0.851946	1.00023	0.966974	1.0344
A0A0H3CAN2	Uncharacterized protein OS=Caulobacter crescentus (strain NA1000 / CB15N) GN=CCNA_03063 PE=4 SV=1 - [A0A0H3CAN2_CAUCN]	CCNA_03063	0.926344	0.895971	1.018	1.07808	1.00211	0.999877	1.02455	1.03009	1.01167	1.01032	1.16381	1.00134	0.994631	0.909966	1.07822	0.843955
A0A0H3CAN3	Sdh5 family flavination protein OS=Caulobacter crescentus (strain NA1000 / CB15N) GN=CCNA_01921 PE=4 SV=1 - [A0A0H3CAN3_CAUCN]	CCNA_01921	0.830086	0.84464	0.771376	1.34856	0.897233	1.12599	0.961336	0.952256	1.17066	1.12319	1.6246	1.04226	1.00954	1.07611	1.19766	0.898509
A0A0H3CAN6	Glutathionylspermidine synthase family OS=Caulobacter crescentus (strain NA1000 / CB15N) GN=CCNA_02446 PE=4 SV=1 - [A0A0H3CAN6_CAUCN]	CCNA_02446	0.928779	0.938378	0.961466	1.06171	1.01509	1.04844	1.0321	0.978026	1.00137	0.98951	1.14313	1.01199	1.05529	0.966003	1.01266	0.953928
A0A0H3CAN7	Glutathione S-transferase OS=Caulobacter crescentus (strain NA1000 / CB15N) GN=CCNA_03068 PE=4 SV=1 - [A0A0H3CAN7_CAUCN]	CCNA_03068	0.86078	0.917316	0.782535	1.1317	1.16263	1.07718	1.05399	1.04722	1.11212	0.995264	1.31474	1.11741	1.00646	1.09999	1.05061	1.047
A0A0H3CAN8	GGDEF diguanylate cyclase DgcB OS=Caulobacter crescentus (strain NA1000 / CB15N) GN=dgcB PE=4 SV=1 - [A0A0H3CAN8_CAUCN]	dgcB	1.01938	0.947908	0.950903	1.03774	1.01481	1.00091	1.0818	1.08041	0.92585	1.01232	1.01801	0.914583	1.00129	1.07201	1.03679	1.03397
A0A0H3CAP0	Type IV secretory pathway, VirB4 ATPase OS=Caulobacter crescentus (strain NA1000 / CB15N) GN=CCNA_02501 PE=4 SV=1 - [A0A0H3CAP0_CAUCN]	CCNA_02501	1.01349	1.08972	1.18613	1.00468	0.89116	0.992843	0.892022	1.09686	0.976586	0.844189	0.991309	1.15683	0.813248	0.854448	1.01192	0.844381
A0A0H3CAP1	Conserved hypothetical membrane protein OS=Caulobacter crescentus (strain NA1000 / CB15N) GN=CCNA_02451 PE=4 SV=1 - [A0A0H3CAP1_CAUCN]	CCNA_02451	1.1662	1.0277	1.06545	1.06567	0.896997	1.03964	1.08365	0.924407	0.871198	0.863062	0.913799	1.00943	1.17226	1.09456	1.02503	1.06783
A0A0H3CAP7	Arc/MetJ-family transcriptional regulator OS=Caulobacter crescentus (strain NA1000 / CB15N) GN=CCNA_03078 PE=4 SV=1 - [A0A0H3CAP7_CAUCN]	CCNA_03078											#DIV/0!	#DIV/0!	#DIV/0!	#DIV/0!	#DIV/0!	#DIV/0!
A0A0H3CAQ0	Cysteine desulfurase OS=Caulobacter crescentus (strain NA1000 / CB15N) GN=CCNA_01936 PE=3 SV=1 - [A0A0H3CAQ0_CAUCN]	CCNA_01936	0.951741	0.959203	0.925655	1.08495	1.06606	1.11069	1.02779	1.01044	0.983729	1.02281	1.13996	0.961794	1.01718	1.02818	0.97682	1.05258
A0A0H3CAQ1	Uncharacterized protein OS=Caulobacter crescentus (strain NA1000 / CB15N) GN=CCNA_02461 PE=4 SV=1 - [A0A0H3CAQ1_CAUCN]	CCNA_02461	0.991528	0.948707	0.910468	1.09708	1.11625	1.09154	0.891824	0.934608	1.07958	0.968562	1.10646	1.11462	0.954222	1.08903	1.00508	1.08353
A0A0H3CAQ4	Glutathione S-transferase OS=Caulobacter crescentus (strain NA1000 / CB15N) GN=CCNA_02516 PE=4 SV=1 - [A0A0H3CAQ4_CAUCN]	CCNA_02516	0.790064	0.9087	0.901011	0.843994	1.29081	1.20724	1.06029	0.742114	1.39215	0.933175	1.06826	1.49185	1.42874	0.876864	0.699108	1.25426
A0A0H3CAQ6	Cysteine desulfhydrase/Selenocysteine lyase OS=Caulobacter crescentus (strain NA1000 / CB15N) GN=CCNA_01941 PE=3 SV=1 - [A0A0H3CAQ6_CAUCN]	CCNA_01941	0.95659	0.949544	0.952739	1.00666	1.12201	1.00365	0.972085	0.992533	1.008	1.05505	1.05234	0.955406	0.979399	1.00404	1.003	1.00104
A0A0H3CAQ7	Polyisoprenylphosphate hexose-1-phosphotransferase pssZ OS=Caulobacter crescentus (strain NA1000 / CB15N) GN=pssZ PE=4 SV=1 - [A0A0H3CAQ7_CAUCN]	pssZ	0.942879	0.89369	0.859209	1.19786	1.05447	1.13602	1.08452	1.02319	0.946237	0.989697	1.27043	0.956087	1.05994	1.09738	1.05443	1.04073
A0A0H3CAR0	Cobalt-zinc-cadmium resistance protein czcB OS=Caulobacter crescentus (strain NA1000 / CB15N) GN=CCNA_02472 PE=4 SV=1 - [A0A0H3CAR0_CAUCN]	CCNA_02472	1.02075	1.02278	0.969227	0.898485	0.940109	0.849213	0.946002	0.999312	1.01672	1.17673	0.880221	0.864021	0.946654	1.05316	1.05802	0.995404
A0A0H3CAR1	Aspartate carbamoyltransferase OS=Caulobacter crescentus (strain NA1000 / CB15N) GN=pyrB PE=3 SV=1 - [A0A0H3CAR1_CAUCN]	pyrB	0.998976	0.961238	0.984128	1.03028	1.00797	1.03375	1.07069	1.01384	1.01076	0.989402	1.03134	1.02158	1.05607	1.01509	0.996647	1.0185
A0A0H3CAR2	Thioredoxin peroxidase OS=Caulobacter crescentus (strain NA1000 / CB15N) GN=CCNA_01947 PE=4 SV=1 - [A0A0H3CAR2_CAUCN]	CCNA_01947	0.960662	1.05102	0.95053	0.973586	0.94475	0.951524	1.00032	0.976793	1.08645	0.983663	1.01345	1.1045	1.02409	1.01066	1.02319	0.987758
A0A0H3CAR4	Citrate lyase beta subunit OS=Caulobacter crescentus (strain NA1000 / CB15N) GN=CCNA_03094 PE=3 SV=1 - [A0A0H3CAR4_CAUCN]	CCNA_03094	1.14123	1.15622	1.11398	0.968382	0.961037	0.928406	0.882779	1.01522	0.936256	0.883276	0.848544	1.05998	0.869548	1.02446	1.04306	0.982167
A0A0H3CAR5	Vanillate demethylase oxidoreductase subunit vanB OS=Caulobacter crescentus (strain NA1000 / CB15N) GN=vanB PE=4 SV=1 - [A0A0H3CAR5_CAUCN]	vanB											#DIV/0!	#DIV/0!	#DIV/0!	#DIV/0!	#DIV/0!	#DIV/0!
A0A0H3CAR6	Ribonuclease E OS=Caulobacter crescentus (strain NA1000 / CB15N) GN=rne PE=3 SV=1 - [A0A0H3CAR6_CAUCN]	rne	1.02898	1.00719	1.02473	0.938746	0.983352	0.95538	1.01534	1.04405	1.00615	1.04403	0.912308	0.96372	0.972502	1.00415	0.982589	1.02194
A0A0H3CAS2	Ribonuclease R OS=Caulobacter crescentus (strain NA1000 / CB15N) GN=rnr PE=3 SV=1 - [A0A0H3CAS2_CAUCN]	rnr	1.0318	0.992816	1.00508	0.994892	0.969973	0.969353	1.00437	1.06145	1.04026	1.03025	0.964234	1.00972	0.946221	1.02658	1.02635	1.00023
A0A0H3CAS3	Biotin carboxylase OS=Caulobacter crescentus (strain NA1000 / CB15N) GN=CCNA_01961 PE=4 SV=1 - [A0A0H3CAS3_CAUCN]	CCNA_01961	0.994747	1.04529	1.04421	1.01416	0.970837	0.998873	1.02303	0.984866	0.976806	0.989181	1.01951	0.987489	1.03875	0.952627	1.0153	0.938271
A0A0H3CAS4	BolA protein OS=Caulobacter crescentus (strain NA1000 / CB15N) GN=CCNA_03106 PE=3 SV=1 - [A0A0H3CAS4_CAUCN]	CCNA_03106											#DIV/0!	#DIV/0!	#DIV/0!	#DIV/0!	#DIV/0!	#DIV/0!
A0A0H3CAS6	4-hydroxybenzoate 3-monooxygenase OS=Caulobacter crescentus (strain NA1000 / CB15N) GN=CCNA_02487 PE=4 SV=1 - [A0A0H3CAS6_CAUCN]	CCNA_02487	0.647512	0.615514	0.610597	0.648461	0.697793	0.762599	1.03415	0.787887	0.984032	3.23441	1.00147	0.304239	1.31256	1.06046	0.850331	1.24711
A0A0H3CAS8	Pentapeptide repeats containing protein OS=Caulobacter crescentus (strain NA1000 / CB15N) GN=CCNA_01968 PE=4 SV=1 - [A0A0H3CAS8_CAUCN]	CCNA_01968	1.15223	0.939341	0.788458	0.970113	0.933399	0.830499	1.41524	1.31913	0.964154	0.94967	0.841945	1.01525	1.07285	1.46137	1.16811	1.25106
A0A0H3CAT1	Protocatechuate 3,4-dioxygenase alpha chain OS=Caulobacter crescentus (strain NA1000 / CB15N) GN=CCNA_02492 PE=4 SV=1 - [A0A0H3CAT1_CAUCN]	CCNA_02492	0.759978	0.778498	0.726133	0.720439	0.816239	0.813136	0.775726	0.825505	1.04491	2.51807	0.947973	0.414966	0.939698	1.04661	0.886	1.18128
A0A0H3CAT2	Glucokinase OS=Caulobacter crescentus (strain NA1000 / CB15N) GN=CCNA_02549 PE=4 SV=1 - [A0A0H3CAT2_CAUCN]	CCNA_02549	1.00801	0.977682	0.960136	1.09756	1.14031	1.12731	0.937764	0.948853	0.946064	0.895429	1.08883	1.05655	0.988313	1.04987	0.973603	1.07833
A0A0H3CAT5	Transposase OS=Caulobacter crescentus (strain NA1000 / CB15N) GN=CCNA_00548 PE=4 SV=1 - [A0A0H3CAT5_CAUCN]	CCNA_00548	1.07535	1.13124	1.04794	1.02497	1.00018	1.0109	1.02069	0.834526	0.980777	0.867836	0.953154	1.13014	1.22307	1.02615	1.01392	1.01207
A0A0H3CAT7	Adenosine 5'-monophosphoramidase OS=Caulobacter crescentus (strain NA1000 / CB15N) GN=CCNA_02555 PE=4 SV=1 - [A0A0H3CAT7_CAUCN]	CCNA_02555	1.0587	0.95353	0.935837	1.01751	0.93266	0.993047	0.902684	1.04829	1.0611	1.09901	0.961098	0.9655	0.861101	1.13128	1.02464	1.10408
[truncated: 962 more rows]

## Sheet: Replicate 2
Replicate 2			WT 0 min	WT 15 min	WT 30 min	Dlon 0 min	Dlon 15 min	Dlon 30 min	gluc	xyl 1h lon overexpression	Lon depletion (no van)	lon expression (+ van)	Dlon 0/WT 0	Lon depletion (no van)/lon expression (+ van)	gluc/+ xyl 1h lon overexpression	WT 0/WT 30	Dlon 0/Dlon 30	(WT 0/WT 30)/(Dlon 0/Dlon 30)
[truncated: 2,376 more rows]

[truncated: 8 more sheets: averages replicate 1&2, Group higher levels in Dlon, Group higher levels Lon depl, Group lower levels lon OE, Group stabilized in Dlon, Overlap groups see Fig1D, funct. cat. Lon subst see Fig1E, funct. cat. all prot see Fig1E]
